# Supplementary material for: SARS-CoV-2 host-shutoff impacts innate NK cell functions, but antibody-dependent NK activity is strongly activated through non-spike antibodies
Source: eLife journal article supplement (doi:10.7554/elife.74489), 2022-05-19
Supplement: supp [file elife-74489-supp-v1.zip]

# Uncropped Blot From Fig. 3B

## RAd-MICA

Mock    SCV2  
- E P   - E P

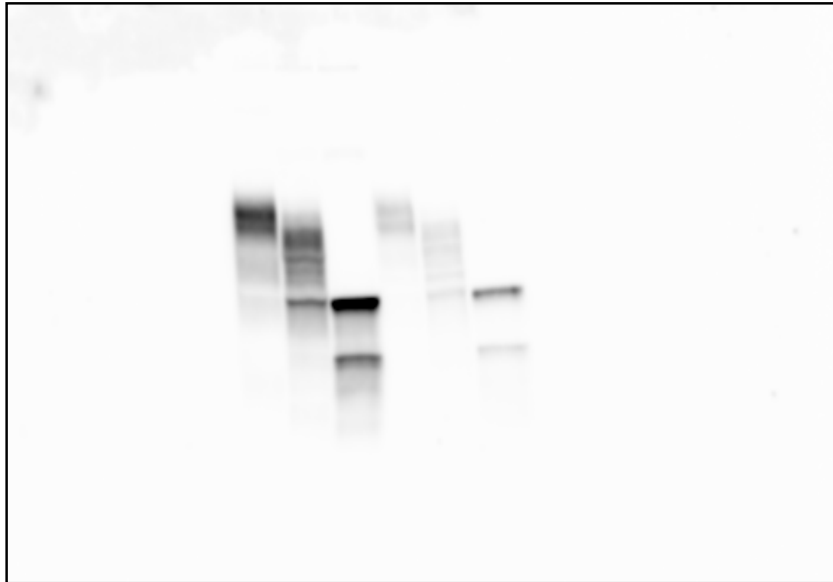

NKL

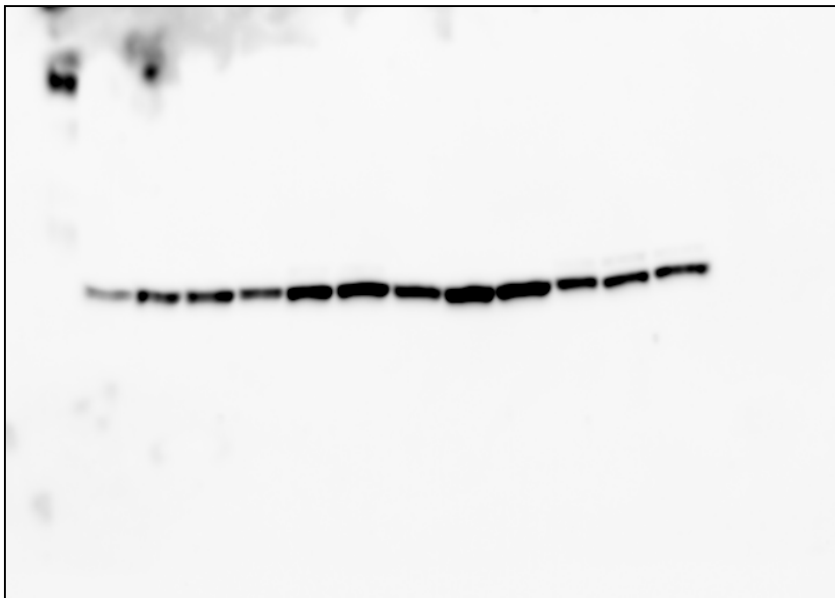

Actin

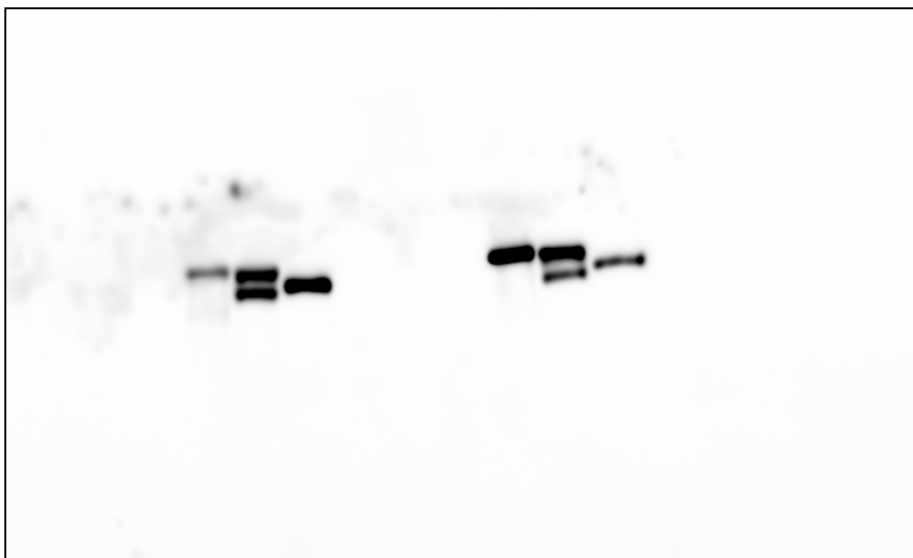

Spike

# Uncropped Blot From Fig. 3B

RAAd-ULBP2

Mock    SCV2

- E P   - E P

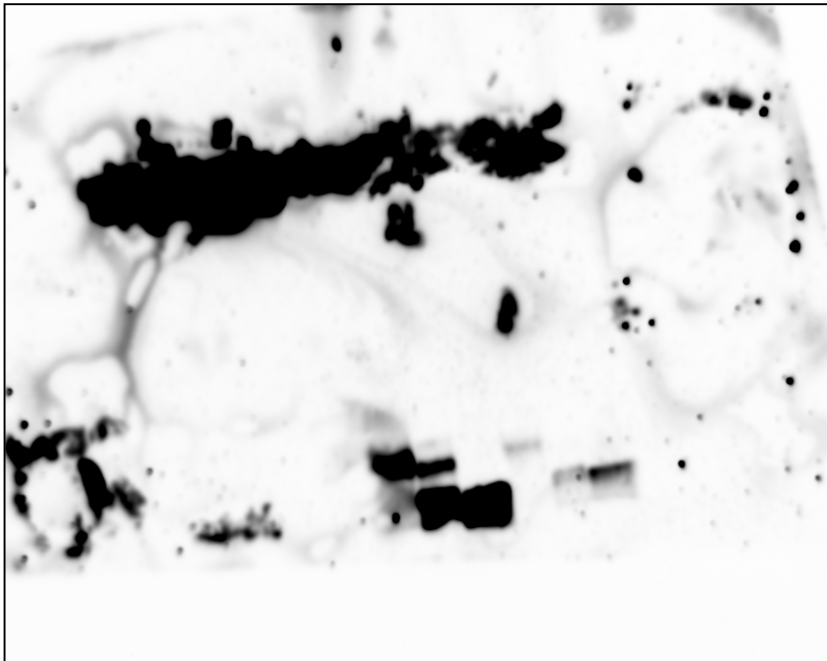

NKL

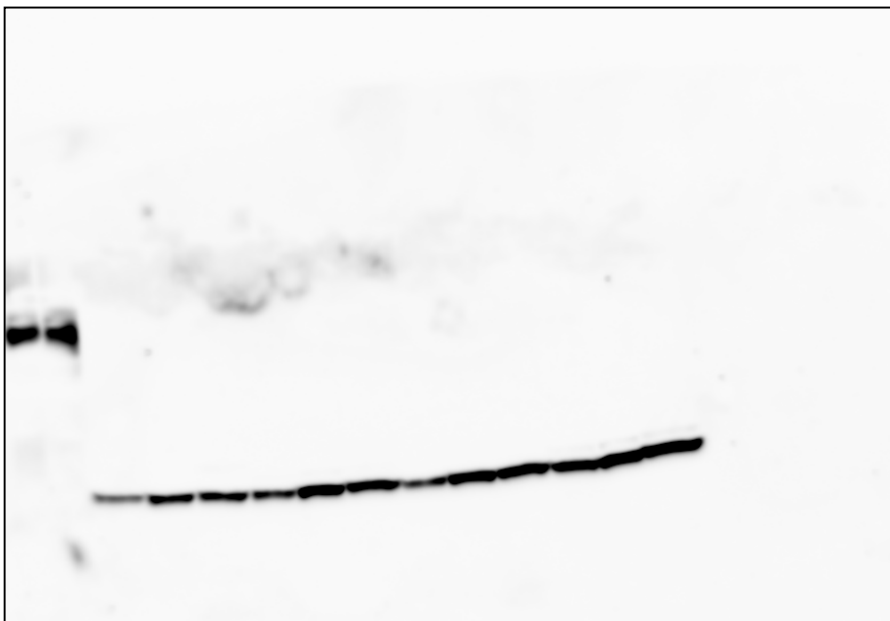

Actin

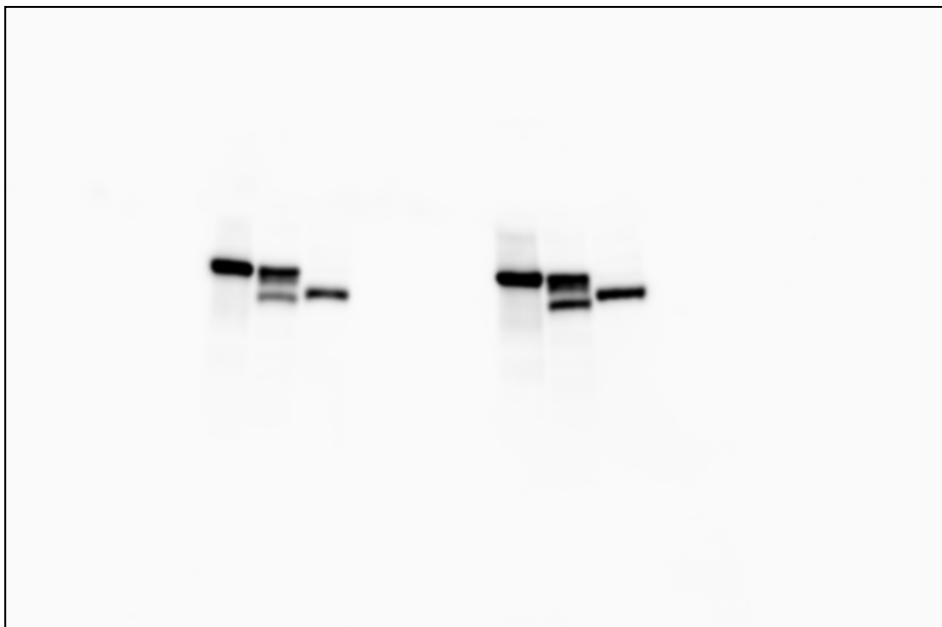

Spike

# Uncropped Blot From Fig. 3B

RAd-B7-H6

Mock    SCV2  
- E P   - E P

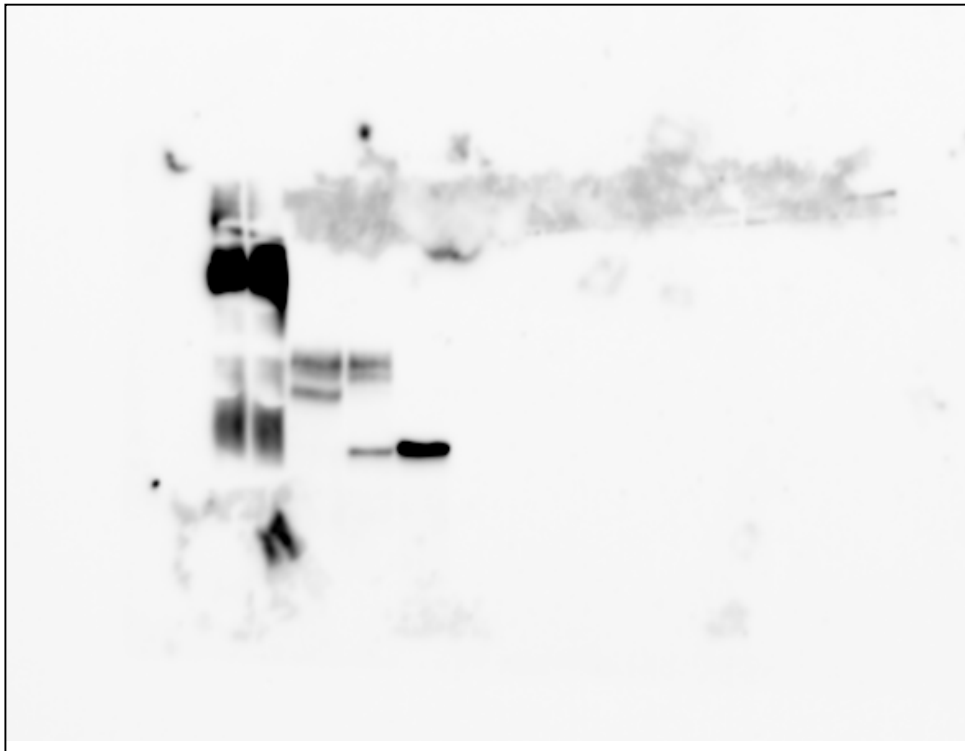

NKL

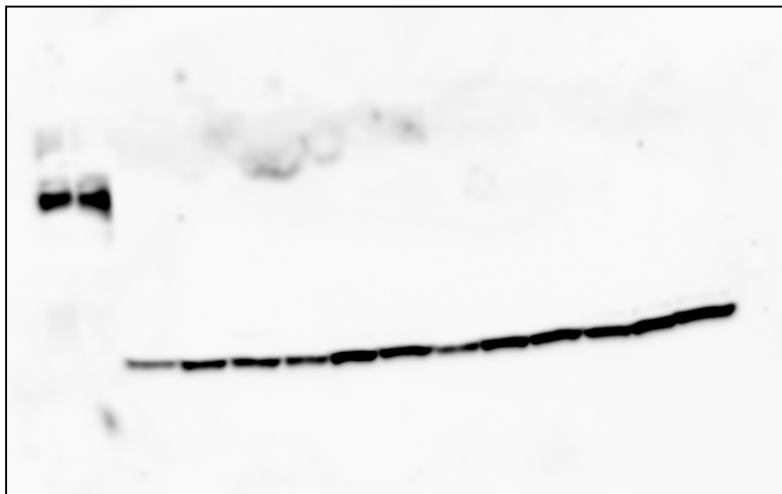

Actin

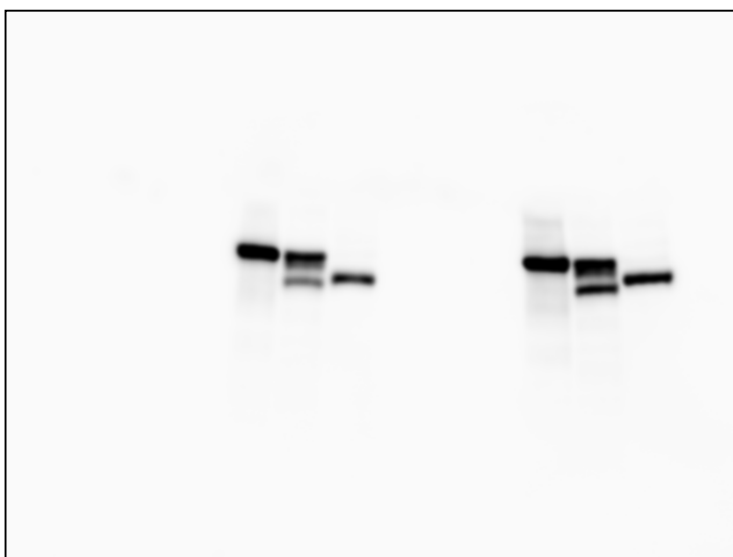

Spike

# Uncropped Blot From Fig. 3C

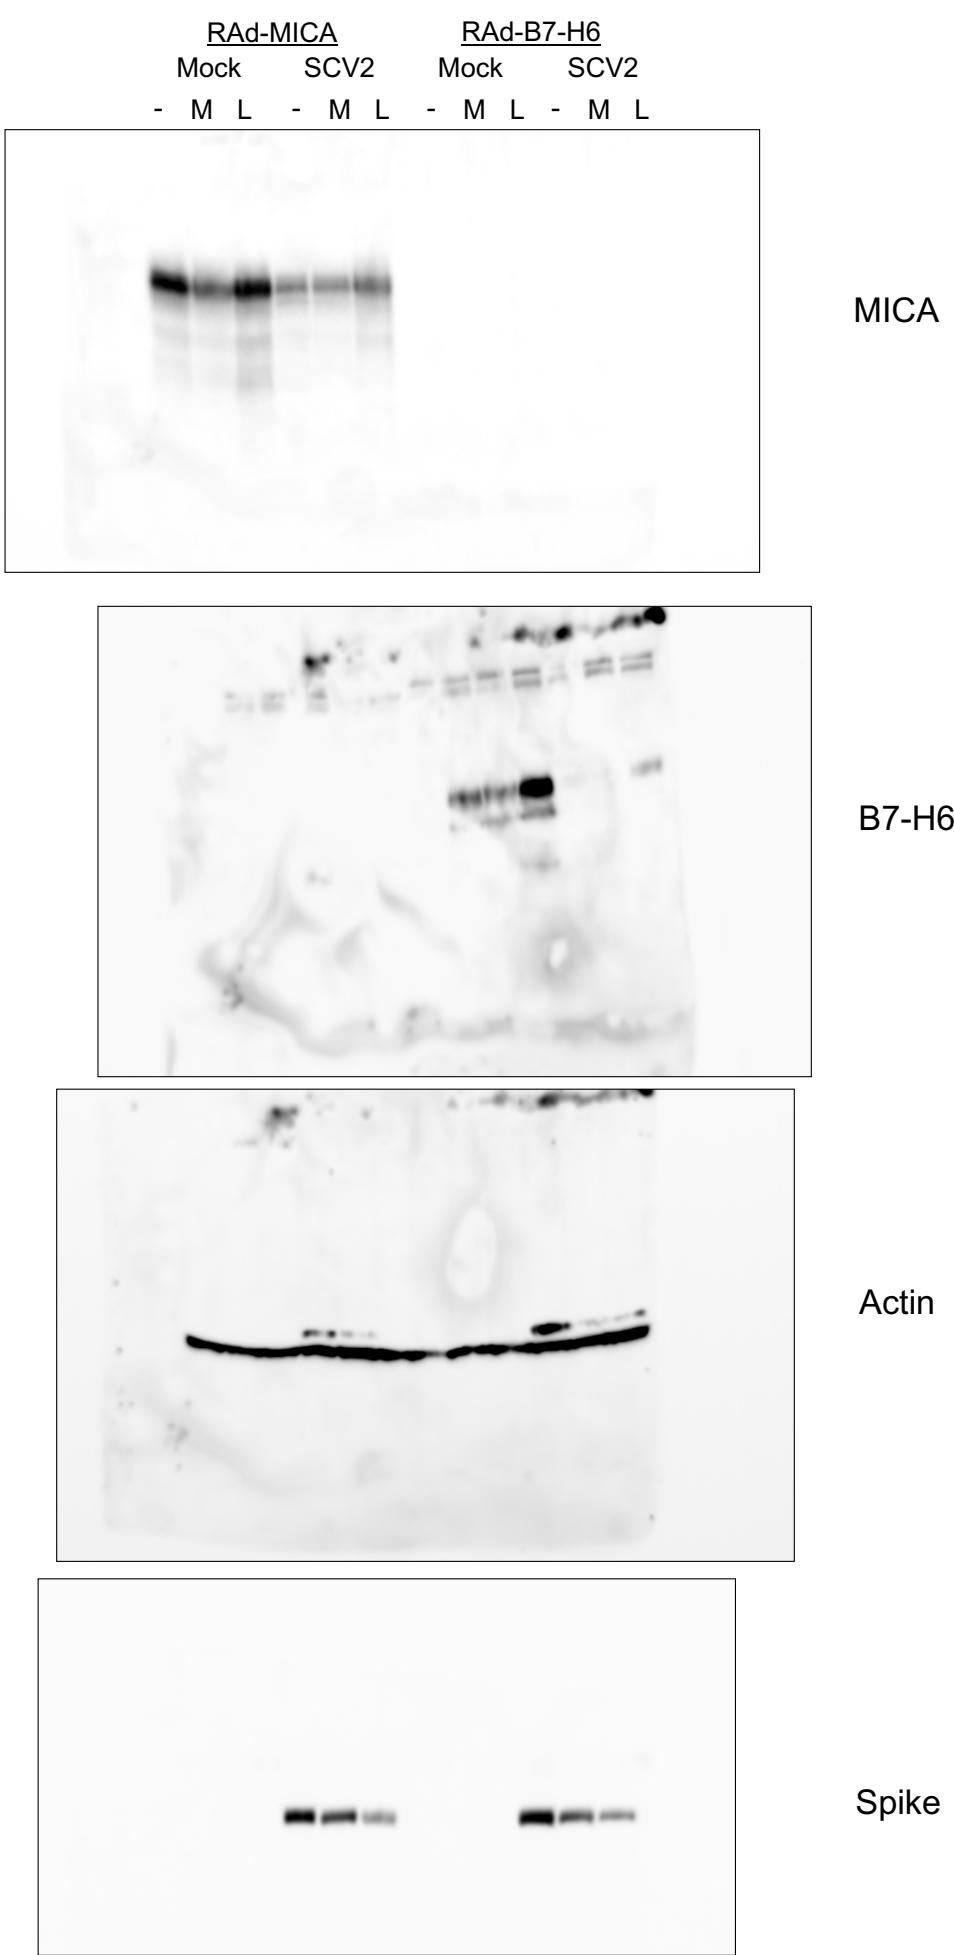

# Uncropped Blot From Fig. 4A

| <u>RAd-MICA</u> |     |      | <u>RAd-B7-H6</u> |     |      | <u>RAd-GFP</u> |     |      |
|-----------------|-----|------|------------------|-----|------|----------------|-----|------|
| -               | CHX | SCV2 | -                | CHX | SCV2 | -              | CHX | SCV2 |

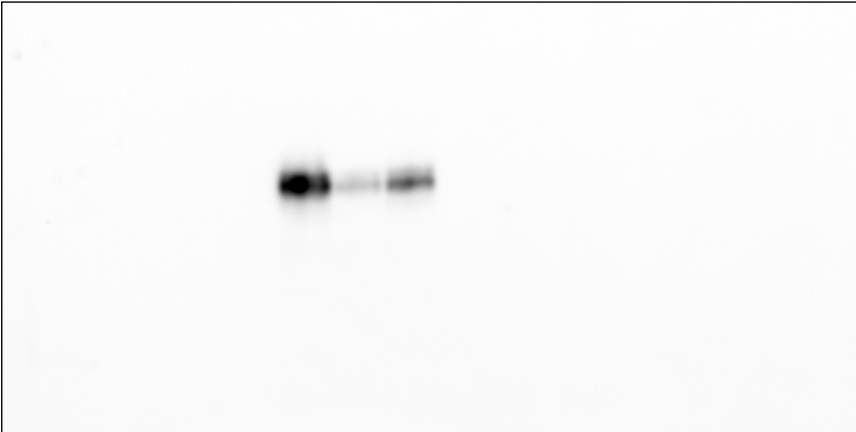

MICA

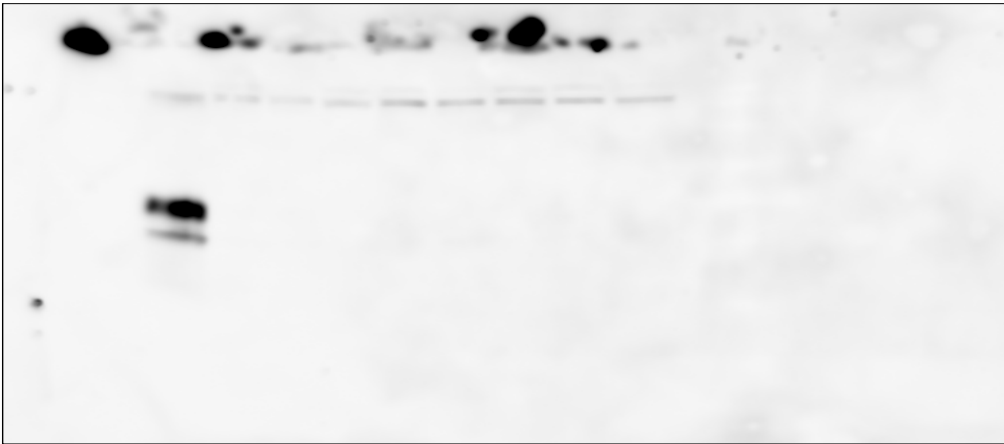

B7-H6

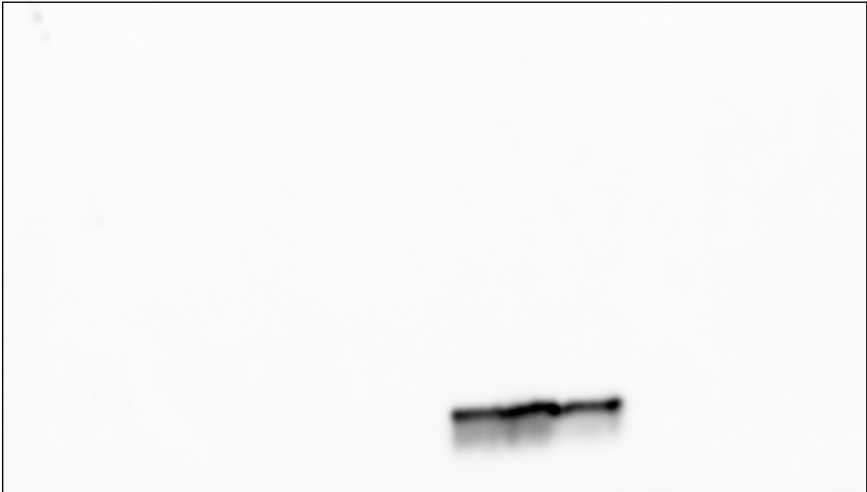

GFP

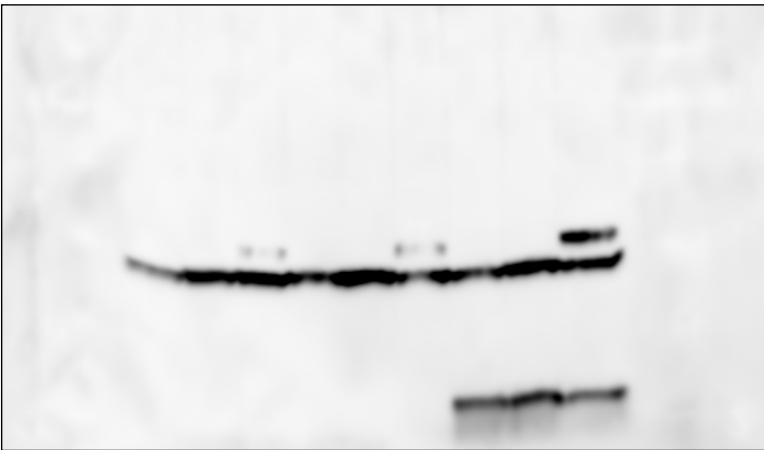

Actin
