# Supplementary material for: SARS-CoV-2 host-shutoff impacts innate NK cell functions, but antibody-dependent NK activity is strongly activated through non-spike antibodies
Source: eLife. 2022 May 19;11:e74489. doi: 10.7554/eLife.74489 (PMC9239683; doi:10.7554/eLife.74489)
Supplement: Supplementary file 1. [file elife-74489-supp1.xlsx]

## Sheet: Key
Master
Database	The search is performed in an itterative manner, first against canonical human (and viral) proteins in the Swissprot database (SP) and second in the tREMBL database (tR)
#Unique	The number of unique peptides used for identification
-10lgP	The -10 log of the p value indicating the likleyhood of a false identification.
Total Abundance	As calculated from a label free analysis of identified proteins using peak areas of precursor ions. Used for calculating the realtive abundance of viral proteins.
GO:CC	The Gene Onology Cellular Component of each protein. Used for calulation of PM enrichment.
Membrane	Proteins with plasma membrane related GO:CC annotation as described in manuscript
Blue Columns	Raw quantitative data for each replicate, from TMT reporter ion intensities.
Red Columns	The average abundance over the replicates, used for creating ratios
Brown Columns	Data relating to ANOVA analysis and clustering
Grey Columns	Data Relating to the LIMMA analysis of each pairwise comparison. Log(2) of the indicated ratio followed by the log(2) p value and non-logged q value.
Red Highlighted Cells	Ratios greater than 2 fold
Green Highlighted Cells	Ratios less than 0.5 fold
Yellow Highlight Cells	q values less than 0.05
Green Columns	Scaled Abundances. Each protein has been given a total value of 1200 and the abundances scales acording to the ratio data. Used for plotting bar charts.
Purple Columns	Relative abundance of each protein per TMT channel. The total abundance value (described above) and ratio data from TMT reporters are used to arrive at these numbers.
Populate Charts
Write gene names to populate the subsequent charts. Be aware that dublicate gene names (like HLA alleles for example) will not work properly here.
Volcano
Volcano plots of each comparison in the dataset showing log(2) fold change on the x-axis and log(2) p-value on the y-axis. Coloured points highlight the proteins selected in the Populate Charts tab.
BarScatter
Bar and scatter plots with standard deviation shown, based on scaled protein abundances

## Sheet: Master
Database	Taxonomy	Accession	Entry Name	Gene ID	Description	GO:CC	Membrane	#Unique	-10lgP	Total Abundance	Mock_1	Mock_2	Mock_3	12h_1	12h_2	12h_3	24h_1	24h_2	24h_3	48h_1	48h_2	48h_3	Mock	12h	24h	48h	ANOVA.p.val	ANOVA.adj.p.val	maxFC	cluster	12h/Mock	log p	q	24h/mock	log p2	q3	48h/mock	log p4	q5	24h/12h	log p6	q7	48h/12h	log p8	q9	48h/24h	log p10	q11	Mock_112
sp	Homo sapiens	A0A024RBG1	NUD4B_HUMAN	NUDT4B	Diphosphoinositol polyphosphate phosphohydrolase NUDT4B	cytoplasm [GO:0005737]; cytosol [GO:0005829]; nucleus [GO:0005634]	FALSE	1	63.31	4200000	65041	73357	65935	42147	48641	56563	50646	49503	59430	43455	57348	47845	68111	49117	53193	49549.3					-0.471665	-7.75096	0.023438	-0.356651	-5.69346	0.0480626	-0.459022	-8.43183	0.00712774	0.115014	-1.11322	0.645055	0.0126432	-0.313822	0.847741	-0.102371	-1.59455	0.466643	118.272
tR	Homo sapiens	A0A087WWU8	A0A087WWU8_HUMAN	TPM3	Tropomyosin alpha-3 chain	cytoskeleton [GO:0005856]	FALSE	2	57.47	36500000	782370	933920	834270	899010	1000600	891320	1086000	1222700	905650	1977100	1225100	1783300	850187	930310	1071450	1.66183e+06					0.129932	-1.10935	0.619552	0.333713	-3.86193	0.131284	0.966924	-13.4759	0.000384951	0.203781	-2.06374	0.435782	0.836992	-11.6593	0.00155451	0.633211	-8.46116	0.0134301	69.3317
tR	Homo sapiens	A0A087WYL5	A0A087WYL5_HUMAN	SEZ6L2	Seizure 6-like protein 2	endoplasmic reticulum [GO:0005783]; integral component of membrane [GO:0016021]; neuronal cell body [GO:0043025]	FALSE	2	63.56	42500000	2233800	2067900	2725300	2122200	1282400	962980	948080	758040	750260	615490	1737600	774710	2.34233e+06	1455860	818793	1042600					-0.686075	-4.54343	0.11804	-1.51638	-10.618	0.00332248	-1.16776	-9.07129	0.00485131	-0.8303	-4.59616	0.14982	-0.481686	-3.08901	0.183849	0.348615	-0.827941	0.685536	157.877
tR	Homo sapiens	A0A087X0K9	A0A087X0K9_HUMAN	TJP1	Tight junction protein ZO-1	bicellular tight junction [GO:0005923]; cell junction [GO:0030054]; cytosol [GO:0005829]; plasma membrane [GO:0005886]	TRUE	1	43.43	4150000	262970	309180	255280	290910	329570	327990	411000	543840	461650	681120	604520	654460	275810	316157	472163	646700					0.196965	-2.78449	0.276748	0.775611	-14.7388	0.000388899	1.22942	-22.0017	3.90525e-06	0.578646	-11.0546	0.0155388	1.03246	-19.3744	4.36774e-05	0.453811	-8.90028	0.0108223	61.4836
tR	Homo sapiens	A0A096LP07	A0A096LP07_HUMAN	GPS1	COP9 signalosome complex subunit 1	COP9 signalosome [GO:0008180]; cytosol [GO:0005829]; nucleoplasm [GO:0005654]	FALSE	1	30.11	0	129030	103280	148990	115620	102850	128200	146570	129080	151920	144900	179160	146760	127100	115557	142523	156940					-0.137364	-1.22457	0.585435	0.165234	-2.09566	0.345261	0.304249	-4.3224	0.0835491	0.302598	-4.06138	0.184998	0.441613	-6.51751	0.0260567	0.139015	-1.41524	0.512646	95.204
tR	Homo sapiens	A0A096LP69	A0A096LP69_HUMAN	CD99	CD99 antigen	integral component of membrane [GO:0016021]	TRUE	1	74.79	35700000	632320	397580	548370	726860	573860	583780	460670	531820	426330	480720	400720	422940	526090	628167	472940	434793					0.255838	-2.87974	0.263752	-0.153652	-1.57129	0.454345	-0.27498	-2.88815	0.19529	-0.40949	-5.44526	0.107958	-0.530818	-7.06818	0.0191816	-0.121327	-0.836364	0.683751	122.662
tR	Homo sapiens	A0A0A0MSI3	A0A0A0MSI3_HUMAN	PTER	Phosphotriesterase-related protein	0	FALSE	1	37.02	5170000	1748500	2003200	1814400	1233800	1147500	1213700	1365000	1270800	1407800	1855400	1626100	1413100	1.85537e+06	1.19833e+06	1.34787e+06	1.63153e+06					-0.630675	-14.6625	0.000766227	-0.461027	-10.0028	0.00461211	-0.185476	-3.98294	0.102663	0.169649	-3.70529	0.215792	0.445199	-9.71877	0.00438079	0.275551	-4.53567	0.101862	115.927
tR	Homo sapiens	A0A0A0MSU4	A0A0A0MSU4_HUMAN	ABCA8	ATP-binding cassette sub-family A member 8	integral component of membrane [GO:0016021]	TRUE	2	81.5	20900000	1072000	904080	1092200	1292300	1254400	1254100	852560	819310	932950	557780	757970	503800	1022760	1.26693e+06	868273	606517	0.000459597	0.0014579	2.08887	2	0.308873	-5.21914	0.0850901	-0.236246	-3.74406	0.139435	-0.753848	-13.9508	0.000293854	-0.545119	-10.426	0.0184601	-1.06272	-19.0862	4.96587e-05	-0.517602	-9.13377	0.00961621	113.907
sp	Homo sapiens	A0A0B4J2D5	GAL3B_HUMAN	GATD3B	Glutamine amidotransferase-like class 1 domain-containing protein 3B mitochondrial	mitochondrion [GO:0005739]	FALSE	5	134.28	164000000	2513900	3526700	1974400	2681000	2770200	2605300	2470800	2162500	2499800	4592900	4794100	4438100	2.67167e+06	2685500	2377700	4.60837e+06					0.0074507	-0.385557	0.854279	-0.168173	-1.40264	0.497795	0.786515	-11.7353	0.00102939	-0.175624	-2.0254	0.441555	0.779065	-10.9729	0.00219861	0.954689	-13.9096	0.00111838	81.4665
tR	Homo sapiens	A0A0C4DGB5	A0A0C4DGB5_HUMAN	CAST	Calpastatin	cytosol [GO:0005829]; endoplasmic reticulum [GO:0005783]	FALSE	4	122.9	56800000	590820	659890	662940	727310	857350	830320	948960	928960	1003600	1523900	1617200	1653000	637883	804993	960507	1.59803e+06					0.335684	-9.45944	0.0101764	0.590503	-15.829	0.00021598	1.32493	-28.7023	1.93162e-07	0.254819	-5.66727	0.0981147	0.989249	-23.4665	9.69354e-06	0.73443	-19.0777	0.00013962	59.0611
tR	Homo sapiens	A0A0C4DH18	A0A0C4DH18_HUMAN	ARL6IP4	ADP-ribosylation factor-like protein 6-interacting protein 4	nuclear speck [GO:0016607]; nucleolus [GO:0005730]	FALSE	1	39.56	4030000	48530	60899	46277	48324	56778	53426	36976	31202	39102	28337	48532	39251	51902	52842.7	35760	38706.7					0.0259131	-0.239544	0.906969	-0.537443	-6.45021	0.0316765	-0.423208	-4.94544	0.0577087	-0.563357	-6.98551	0.0601657	-0.449121	-5.47259	0.0471292	0.114235	-0.769529	0.706341	108.319
tR	Homo sapiens	A0A0D9SF60	A0A0D9SF60_HUMAN	PKP4	Plakophilin-4	cell junction [GO:0030054]; plasma membrane [GO:0005886]	TRUE	1	34.88	3940000	92125	114500	95695	89224	98659	98144	97434	92503	98724	87232	142080	118470	100773	95342.3	96220.3	115927					-0.0799251	-0.593927	0.781161	-0.0667002	-0.281697	0.874736	0.202107	-2.19729	0.293353	0.0132249	-0.267247	0.891078	0.282032	-3.24086	0.16868	0.268807	-2.71806	0.26302	90.2604
tR	Homo sapiens	A0A0J9YW04	A0A0J9YW04_HUMAN	MYO15B	Unconventional myosin-XVB (Fragment)	cytoskeleton [GO:0005856]	FALSE	1	129.22	1500000	44523	60328	33837	38541	28138	41930	44689	40613	39433	31534	36368	29934	46229.3	36203	41578.3	32612					-0.352699	-2.63226	0.297697	-0.152977	-0.636486	0.73628	-0.503406	-4.30937	0.0841978	0.199723	-1.60192	0.527299	-0.150706	-0.968673	0.602386	-0.350429	-3.11219	0.21333	113.708
tR	Homo sapiens	A0A0J9YY01	A0A0J9YY01_HUMAN	MYO15B	Unconventional myosin-XVB	myosin complex [GO:0016459]	FALSE	2	135.77	36000000	643730	721140	635190	642240	623160	667900	691490	788070	652840	763610	620170	750930	666687	644433	710800	711570					-0.0489778	-1.22037	0.586499	0.0924348	-1.1066	0.578521	0.0939968	-0.583889	0.730756	0.141413	-2.82543	0.313158	0.142975	-2.10996	0.321072	0.00156201	-0.398966	0.83612	94.199
sp	Homo sapiens	A0A0U1RRK4	LBHD2_HUMAN	LBHD2	LBH domain-containing protein 2	0	FALSE	1	30.27	2950000	195500	218580	200310	123900	118510	108320	97243	101310	88625	102070	143410	81324	204797	116910	95726	108935					-0.808794	-12.042	0.0029353	-1.09721	-16.2941	0.000170505	-0.910729	-14.4914	0.000216048	-0.288416	-3.58483	0.226114	-0.101935	-1.66482	0.409086	0.18648	-1.25706	0.55555	148.565
tR	Homo sapiens	A0A140T8W8	A0A140T8W8_HUMAN	HLA-A	HLA class I histocompatibility antigen A alpha chain	0	FALSE	2	135.98	333000000	1570100	1635400	1375700	1521700	1782700	1630800	1563700	1558800	1536100	1840700	2284600	1994300	1.52707e+06	1.64507e+06	1.55287e+06	2.03987e+06					0.107383	-1.22753	0.584966	0.0241709	-0.682276	0.719453	0.417712	-8.37413	0.00736766	-0.0832121	-0.403019	0.855382	0.310329	-6.15023	0.0321395	0.393541	-7.01215	0.0275201	92.8385
tR	Homo sapiens	A0A140T975	A0A140T975_HUMAN	HLA-A	HLA class I histocompatibility antigen A alpha chain	0	FALSE	1	120.39	60100000	1202200	1177700	1298100	1151300	1692000	1520600	1151400	692250	1126200	1114500	2414500	1253500	1226000	1.45463e+06	989950	1.59417e+06					0.246697	-1.18899	0.595335	-0.308531	-2.31537	0.306705	0.378843	-1.94231	0.340142	-0.555228	-4.26911	0.173003	0.132147	-0.492784	0.786317	0.687375	-5.2727	0.06972	91.3396
tR	Homo sapiens	A0A140T986	A0A140T986_HUMAN	MICA	MHC class I polypeptide-related sequence A	integral component of membrane [GO:0016021]	TRUE	2	71.06	78100000	4619500	3637300	4541100	1879800	1883000	1790000	1008200	784550	860940	717500	1426700	985710	4.26597e+06	1.85093e+06	884563	1.0433e+06	3.51793e-05	0.000230735	4.82268	1	-1.20462	-15.6918	0.000445364	-2.26984	-25.6499	1.4852e-06	-2.03171	-24.1198	1.41853e-06	-1.06522	-14.0751	0.00559653	-0.827094	-11.4082	0.00176457	0.238121	-1.81232	0.419896	229.69
tR	Homo sapiens	A0A140T997	A0A140T997_HUMAN	HLA-B	HLA class I histocompatibility antigen B alpha chain (Fragment)	0	FALSE	2	117.25	171000000	1626000	1173100	1117700	1404900	1319000	1198800	1265700	1350900	1393900	5962100	6236100	5244600	1305600	1.30757e+06	1.33683e+06	5.81427e+06					0.00217154	-0.117115	0.956036	0.0341066	-0.878749	0.650335	2.15488	-30.7792	7.03996e-08	0.0319351	-0.714692	0.754695	2.15271	-30.6788	3.10871e-07	2.12078	-30.1428	6.76102e-07	66.6102
tR	Homo sapiens	A0A140T9H4	A0A140T9H4_HUMAN	MICB	MHC class I polypeptide-related sequence B (Fragment)	0	FALSE	1	29.31	72300000	322840	341030	361640	251640	290630	265810	314050	204650	228420	156240	294710	188110	341837	269360	249040	213020					-0.343772	-3.53765	0.194274	-0.45693	-4.7615	0.0800799	-0.682318	-7.74993	0.0106803	-0.113158	-0.635827	0.785417	-0.338547	-2.8456	0.211702	-0.225389	-1.7883	0.424433	120.322
tR	Homo sapiens	A0A140TA02	A0A140TA02_HUMAN	HLA-B	HLA class I histocompatibility antigen B alpha chain	0	FALSE	1	108.71	0	32106	23434	33428	29854	45595	36685	46391	33222	43492	303880	203210	311590	29656	37378	41035	272893					0.333865	-3.24438	0.223157	0.468531	-4.47379	0.093874	3.20194	-28.8179	1.85614e-07	0.134666	-0.650102	0.780256	2.86808	-26.7661	2.24726e-06	2.73341	-26.1565	5.71482e-06	33.7104
sp	Homo sapiens	A0A1B0GTL2	CT204_HUMAN	C20orf204	Uncharacterized protein C20orf204	0	FALSE	1	29.17	10100000	636250	663100	558990	753250	538780	779600	525210	362110	598260	481170	445990	356150	619447	690543	495193	427770					0.156752	-0.858504	0.692892	-0.322988	-3.28041	0.179892	-0.534145	-5.93864	0.0317947	-0.47974	-4.85191	0.13587	-0.690897	-7.59995	0.0142031	-0.211157	-1.60556	0.464058	113.975
tR	Homo sapiens	A0A1B0GUM1	A0A1B0GUM1_HUMAN	PLEKHA7	Pleckstrin homology domain-containing family A member 7 (Fragment)	0	FALSE	1	34.23	9220000	353180	284120	290350	345520	281700	378450	416060	284830	266990	241080	291970	275560	309217	335223	322627	269537					0.116504	-1.07949	0.62747	0.0612476	-0.455953	0.803736	-0.198137	-1.19216	0.522862	-0.0552569	-0.501385	0.835515	-0.314641	-2.75366	0.222958	-0.259384	-1.89248	0.404458	114.242
tR	Homo sapiens	A0A1B0GW05	A0A1B0GW05_HUMAN	DPY19L1	Probable C-mannosyltransferase DPY19L1	integral component of membrane [GO:0016021]	TRUE	2	76.84	76900000	247440	216300	278850	283490	244200	275310	297540	217980	275480	240100	299080	276670	247530	267667	263667	271950	0.79187	0.801212	1.09865		0.112834	-1.37524	0.545158	0.0911118	-0.941758	0.628876	0.135738	-1.85386	0.35829	-0.0217223	-0.294324	0.882182	0.0229039	-0.294324	0.856882	0.0446262	-0.639848	0.758264	94.1899
tR	Homo sapiens	A0A1C7CYX9	A0A1C7CYX9_HUMAN	DPYSL2	Dihydropyrimidinase-related protein 2	cytosol [GO:0005829]; dendrite [GO:0030425]; growth cone [GO:0030426]; myelin sheath [GO:0043209]; neuronal cell body [GO:0043025]; plasma membrane [GO:0005886]; protein-containing complex [GO:0032991]; terminal bouton [GO:0043195]	TRUE	6	101.08	42700000	784380	760350	910870	1153600	981750	1177400	1260600	1028000	1230200	1529400	1715800	1576200	818533	1104250	1.17293e+06	1.60713e+06	0.000171809	0.000712145	1.96343	4	0.431954	-8.67386	0.0150097	0.519008	-11.0152	0.0026638	0.973377	-19.3893	1.51827e-05	0.0870542	-1.37514	0.58023	0.541423	-11.2891	0.00187118	0.454369	-8.96374	0.0104663	66.7153
tR	Homo sapiens	A0A1W2PP35	A0A1W2PP35_HUMAN	HNRNPU	Heterogeneous nuclear ribonucleoprotein U (Fragment)	nucleoplasm [GO:0005654]	FALSE	1	56.8	10200000	167370	164440	174160	129820	114240	130850	136050	136110	148630	225280	210220	206520	168657	124970	140263	214007					-0.432508	-12.9146	0.00187883	-0.265951	-6.52416	0.0304221	0.343566	-10.3206	0.0023506	0.166556	-5.11022	0.123102	0.776074	-21.5962	1.74082e-05	0.609518	-17.1587	0.000315405	103.331
tR	Homo sapiens	A0A286YES6	A0A286YES6_HUMAN	MACF1	Microtubule-actin cross-linking factor 1 isoforms 1/2/3/5	0	FALSE	1	45.19	974000	40764	40360	34294	28372	31253	40267	36800	31606	33684	41363	47087	45245	38472.7	33297.3	34030	44565					-0.208427	-3.33599	0.214086	-0.177027	-2.72331	0.245388	0.212077	-2.7157	0.215676	0.0314005	-0.316086	0.873825	0.420504	-7.38079	0.0160705	0.389104	-6.68953	0.032372	108.44
tR	Homo sapiens	A0A2R8Y566	A0A2R8Y566_HUMAN	RELCH	RAB11-binding protein RELCH	trans-Golgi network [GO:0005802]	FALSE	1	40.5	360000	32490	14635	17604	25965	35332	35301	42199	44932	41349	25164	32439	30803	21576.3	32199.3	42826.7	29468.7					0.577581	-5.91757	0.0594612	0.98906	-10.8024	0.00299954	0.449732	-4.41097	0.0793396	0.411479	-3.4628	0.238373	-0.127849	-0.779703	0.668359	-0.539328	-4.92127	0.0840067	103.085
tR	Homo sapiens	A0A2R8Y611	A0A2R8Y611_HUMAN	AP3D1	AP-3 complex subunit delta-1 (Fragment)	AP-3 adaptor complex [GO:0030123]	FALSE	1	60.27	8880000	88996	91214	74128	95528	103670	110250	108110	130710	123800	98779	104110	114030	84779.3	103149	120873	105640					0.28295	-5.86234	0.0610387	0.511711	-10.63	0.00330025	0.317367	-6.67056	0.0204431	0.228762	-3.34569	0.250234	0.0344172	-0.375731	0.82404	-0.194344	-2.63141	0.275143	85.8948
tR	Homo sapiens	A0A2R8Y635	A0A2R8Y635_HUMAN	ATP13A3	Cation-transporting ATPase (Fragment)	integral component of membrane [GO:0016021]	TRUE	1	55.08	39300000	173550	194460	161010	181370	151610	214150	133250	156600	143140	141210	125270	135540	176340	182377	144330	134007					0.0485614	-0.432975	0.836046	-0.288989	-4.51935	0.0915514	-0.396055	-7.30488	0.01394	-0.33755	-5.41919	0.108982	-0.444616	-8.21927	0.0100727	-0.107066	-1.64008	0.456449	108.97
tR	Homo sapiens	A0A494C0G5	A0A494C0G5_HUMAN	AGRN	Agrin	integral component of membrane [GO:0016021]	TRUE	1	56.17	0	31300	40027	30710	33347	30019	35395	33724	33407	30788	26338	39080	34527	34012.3	32920.3	32639.7	33315					-0.047079	-0.24783	0.903605	-0.0594317	-0.571944	0.760687	-0.0298861	-0.029564	0.98463	-0.0123526	-0.282119	0.885832	0.0171929	-0.282119	0.861844	0.0295456	-0.611595	0.76915	94.2151
tR	Homo sapiens	A0A494C0R8	A0A494C0R8_HUMAN	CLUH	Clustered mitochondria protein homolog	cytoplasm [GO:0005737]	FALSE	1	56.49	21700000	95905	119250	108130	91947	112400	114640	110490	104180	122680	102930	123090	96045	107762	106329	112450	107355					-0.0193089	-0.117612	0.956036	0.0614396	-1.42919	0.491018	-0.00545468	-0.487566	0.772242	0.0807485	-1.23882	0.611555	0.0138543	-0.345068	0.835202	-0.0668943	-0.758586	0.709467	88.413
tR	Homo sapiens	A0A494C1G7	A0A494C1G7_HUMAN	SPTBN2	Spectrin beta chain non-erythrocytic 2 (Fragment)	0	FALSE	1	38.88	1060000	21531	22247	18471	9043.2	13991	13122	8682.8	10292	18384	13944	21858	19873	20749.7	12052.1	12452.9	18558.3					-0.783808	-6.77144	0.0380168	-0.736603	-6.77144	0.026534	-0.161021	-0.981147	0.586206	0.0472051	-7.20771e-15	1	0.622787	-4.92551	0.0640923	0.575582	-4.92551	0.0838463	134.963
tR	Homo sapiens	A0A499FIZ0	A0A499FIZ0_HUMAN	WDR26	WD repeat-containing protein 26	0	FALSE	1	55.26	775000	22285	21895	23020	21778	20436	17981	26203	19882	23811	17654	25780	17584	22400	20065	23298.7	20339.3					-0.158818	-1.79313	0.447438	0.0567487	-0.50617	0.786382	-0.139226	-1.36635	0.473831	0.215566	-2.65025	0.337314	0.0195912	-0.26176	0.870735	-0.195975	-2.16641	0.349832	103.527
tR	Homo sapiens	A0A590UKA1	A0A590UKA1_HUMAN	GNAS	Guanine nucleotide-binding protein G(s) subunit alpha isoforms short (Fragment)	0	FALSE	1	58.85	16900000	573130	454210	549120	566570	611430	652160	657150	578220	677440	545920	638400	605610	525487	610053	637603	596643					0.215281	-3.44347	0.204013	0.279005	-5.00018	0.070249	0.183215	-3.44347	0.1407	0.0637238	-0.841474	0.714229	-0.0320666	-3.60385e-14	1	-0.0957904	-0.841474	0.681789	96.7395
tR	Homo sapiens	A0A5F9UQ55	A0A5F9UQ55_HUMAN	FBXW4	F-box/WD repeat-containing protein 4	0	FALSE	2	82.86	4710000	177890	174180	168510	142120	125000	141690	131950	136240	123710	115040	113900	124650	173527	136270	130633	117863					-0.348689	-10.2671	0.00689191	-0.409634	-11.2741	0.00231793	-0.558042	-15.8463	0.000100499	-0.0609449	-0.516866	0.830481	-0.209353	-4.85871	0.0666441	-0.148408	-3.82784	0.147611	127.453
tR	Homo sapiens	A0A5H1ZRS1	A0A5H1ZRS1_HUMAN	PCM1	Pericentriolar material 1 protein	centrosome [GO:0005813]	FALSE	1	47.82	15100000	378690	567110	123520	56836	66942	89186	83190	81526	86271	68638	66326	68325	356440	70988	83662.3	67763					-2.32801	-12.6021	0.00220891	-2.09101	-10.9351	0.00278004	-2.39509	-12.6021	0.000630397	0.237003	-0.966885	0.680573	-0.0670774	0	1	-0.30408	-0.966885	0.641714	261.683
sp	Homo sapiens	A0AV96	RBM47_HUMAN	RBM47	RNA-binding protein 47	nucleus [GO:0005634]	FALSE	9	227.8	109000000	2892300	2927700	2971500	2713900	2774700	2570600	2969000	2507400	2876600	2626600	2954700	2737600	2930500	2686400	2.78433e+06	2.77297e+06					-0.125473	-2.67652	0.291302	-0.0738149	-1.03989	0.597425	-0.0797166	-1.80207	0.369073	0.0516578	-1.17261	0.630564	0.0457561	-0.516503	0.776711	-0.00590166	-0.516503	0.807177	103.535
sp	Homo sapiens	A0AVT1	UBA6_HUMAN	UBA6	Ubiquitin-like modifier-activating enzyme 6	cytoplasm [GO:0005737]; cytosol [GO:0005829]; nucleus [GO:0005634]	FALSE	11	164.63	69100000	2887900	2990200	3064400	2417200	2666600	2893800	3852400	3401600	3317700	3152800	3934800	3416800	2.98083e+06	2659200	3523900	3.50147e+06					-0.164723	-3.01243	0.24772	0.241457	-5.3029	0.0594926	0.232244	-4.44742	0.0777488	0.406181	-9.74027	0.0229261	0.396967	-8.88981	0.00697135	-0.00921363	-0.410362	0.832878	91.206
sp	Homo sapiens	A0FGR8	ESYT2_HUMAN	ESYT2	Extended synaptotagmin-2	endoplasmic reticulum membrane [GO:0005789]; endoplasmic reticulum-plasma membrane contact site [GO:0140268]; extrinsic component of cytoplasmic side of plasma membrane [GO:0031234]; integral component of plasma membrane [GO:0005887]; intrinsic component of endoplasmic reticulum membrane [GO:0031227]; membrane [GO:0016020]; organelle membrane contact site [GO:0044232]	TRUE	22	325.94	1190000000	32169000	30351000	33827000	35986000	35832000	39420000	40770000	40072000	41163000	33504000	36834000	38173000	3.21157e+07	3.70793e+07	4.06683e+07	3.61703e+07	0.0034707	0.00703389	1.26631		0.207338	-5.78446	0.0633269	0.340629	-11.3724	0.00220068	0.17153	-4.65588	0.0685582	0.133291	-4.16236	0.178601	-0.0358084	-0.555858	0.76135	-0.169099	-5.27595	0.0695957	88.1139
sp	Homo sapiens	A0JNW5	UH1BL_HUMAN	UHRF1BP1L	UHRF1-binding protein 1-like	cytosol [GO:0005829]; early endosome [GO:0005769]	FALSE	7	133.42	12300000	1451500	1488800	1470900	1546400	1659700	1590300	1738100	1571000	1755500	1631400	1777600	1507600	1470400	1598800	1688200	1.63887e+06					0.120781	-2.70998	0.286957	0.199277	-3.65037	0.146907	0.15649	-2.70998	0.216374	0.0784964	-0.50266	0.835515	0.035709	0	1	-0.0427873	-0.50266	0.810542	90.7717
sp	Homo sapiens	A0MZ66	SHOT1_HUMAN	SHTN1	Shootin-1	axon [GO:0030424]; axonal growth cone [GO:0044295]; cell leading edge [GO:0031252]; cytoplasm [GO:0005737]; filopodium [GO:0030175]; growth cone [GO:0030426]; lamellipodium [GO:0030027]; microtubule [GO:0005874]; microtubule associated complex [GO:0005875]; microtubule cytoskeleton [GO:0015630]; perikaryon [GO:0043204]; perinuclear region of cytoplasm [GO:0048471]	FALSE	14	187.07	88500000	2958800	3001600	2951600	2684200	2877500	3522100	3890700	3578200	3417800	4063900	3875700	3848500	2.97067e+06	3.02793e+06	3628900	3.92937e+06					0.0275467	-0.385563	0.854279	0.288746	-7.23307	0.0206197	0.40351	-11.1181	0.00147933	0.261199	-6.40471	0.0729989	0.375963	-10.3416	0.00310583	0.114764	-2.59755	0.280039	87.3004
sp	Homo sapiens	A0PJW6	TM223_HUMAN	TMEM223	Transmembrane protein 223	integral component of membrane [GO:0016021]	TRUE	1	30.21	6730000	1220600	1027000	1241700	718440	709700	670030	654270	629060	699080	666080	758850	676470	1163100	699390	660803	700467					-0.733806	-17.8457	0.000153789	-0.815682	-19.9183	2.5781e-05	-0.731587	-18.5592	2.29464e-05	-0.0818762	-1.8258	0.4785	0.00221923	-0.485811	0.788222	0.0840954	-1.09722	0.602102	151.45
sp	Homo sapiens	A0PJY2	FEZF1_HUMAN	FEZF1	Fez family zinc finger protein 1	cytosol [GO:0005829]; nuclear chromatin [GO:0000790]; nucleoplasm [GO:0005654]	FALSE	1	32.99	521000000	1102300	1194600	847700	1140300	1086200	1087000	1056600	896630	1184300	897050	1109400	1056700	1048200	1104500	1.04584e+06	1021050					0.0754794	-1.13002	0.612782	-0.00324726	-0.0334439	0.984455	-0.0378605	-0.265669	0.870799	-0.0787267	-1.07737	0.654587	-0.11334	-1.54141	0.4389	-0.0346132	-0.304811	0.865426	104.493
sp	Homo sapiens	A0PK00	T120B_HUMAN	TMEM120B	Transmembrane protein 120B	integral component of membrane [GO:0016021]; membrane [GO:0016020]; nuclear inner membrane [GO:0005637]	FALSE	1	45.03	0	66984	52682	56256	96937	96605	96237	94528	89290	97417	53576	64384	68777	58640.7	96593	93745	62245.7					0.720017	-16.0086	0.00037551	0.67684	-14.0694	0.000555869	0.0860719	-1.43731	0.454794	-0.0431769	-1.35208	0.586722	-0.633945	-13.9685	0.00048136	-0.590768	-11.8638	0.00262655	86.091
sp	Homo sapiens	A1A4S6	RHG10_HUMAN	ARHGAP10	Rho GTPase-activating protein 10	cytosol [GO:0005829]; perinuclear region of cytoplasm [GO:0048471]; plasma membrane [GO:0005886]	TRUE	4	108.8	5210000	190390	208540	189130	237220	216750	228530	262730	272070	256790	243410	239040	223060	196020	227500	263863	235170	0.00029264	0.0010483	1.3461		0.214866	-6.26796	0.0496323	0.42879	-13.4218	0.000763772	0.262703	-8.41836	0.00718356	0.213924	-5.94458	0.088605	0.0478375	-1.17799	0.538659	-0.166087	-3.84344	0.146358	82.5492
sp	Homo sapiens	A1A4Y4	IRGM_HUMAN	IRGM	Immunity-related GTPase family M protein	autophagosome membrane [GO:0000421]; cell projection [GO:0042995]; cytosol [GO:0005829]; endoplasmic reticulum membrane [GO:0005789]; Golgi apparatus [GO:0005794]; Golgi membrane [GO:0000139]; mitochondrion [GO:0005739]; phagocytic cup [GO:0001891]; phagocytic vesicle membrane [GO:0030670]	FALSE	1	31.12	11400000	1079700	1590300	1559800	930970	971580	1002600	610940	442630	625140	846960	1181900	851380	1.40993e+06	968383	559570	960080					-0.541977	-6.24781	0.050104	-1.33324	-16.4217	0.000159689	-0.5544	-6.24781	0.026392	-0.79126	-9.64134	0.0241836	-0.0124236	0	1	0.778836	-9.64134	0.0074091	110.796
sp	Homo sapiens	A1A5C7	S22AN_HUMAN	SLC22A23	Solute carrier family 22 member 23	integral component of membrane [GO:0016021]	TRUE	12	201.5	1050000000	20255000	18817000	19749000	21517000	19997000	19986000	17744000	15566000	18061000	13738000	16615000	13386000	19607000	20500000	1.71237e+07	1.45797e+07	0.0023479	0.00518912	1.40607		0.0642551	-1.83329	0.438974	-0.195377	-3.64548	0.147279	-0.427411	-9.93846	0.00292507	-0.259632	-6.63849	0.0671104	-0.491666	-12.7556	0.000892406	-0.232034	-4.82053	0.0879872	112.825
sp	Homo sapiens	A1L0T0	ILVBL_HUMAN	ILVBL	Acetolactate synthase-like protein	acetolactate synthase complex [GO:0005948]; endoplasmic reticulum membrane [GO:0005789]; integral component of membrane [GO:0016021]; membrane [GO:0016020]	FALSE	13	202.5	200000000	4170800	5294700	4636400	4765800	5076700	5239300	5448400	5334400	5319600	5245100	5635400	5393000	4.70063e+06	5.02727e+06	5.36747e+06	5424500					0.0969191	-2.23717	0.361606	0.191386	-3.97924	0.122827	0.206635	-4.92489	0.0584071	0.0944671	-1.04989	0.660772	0.109716	-1.74325	0.391906	0.0152488	-0.466434	0.819621	81.3027
sp	Homo sapiens	A1L157	TSN11_HUMAN	TSPAN11	Tetraspanin-11	integral component of plasma membrane [GO:0005887]	TRUE	1	56.36	505000000	9809200	7393400	8518000	8336400	7697200	8718000	7155800	6713000	7129800	6028900	7637800	7421100	8.57353e+06	8.25053e+06	6.99953e+06	7.02927e+06					-0.0554025	-0.0571749	0.979631	-0.292631	-3.88973	0.129244	-0.286516	-4.61429	0.0702414	-0.237229	-3.76326	0.210247	-0.231113	-4.48371	0.0825731	0.00611545	-0.34976	0.849357	127.174
sp	Homo sapiens	A1L390	PKHG3_HUMAN	PLEKHG3	Pleckstrin homology domain-containing family G member 3	0	FALSE	5	138.41	10200000	581740	677150	447150	489810	500490	505830	521510	505290	537870	520030	630110	538200	568680	498710	521557	562780					-0.189416	-3.15642	0.232282	-0.124793	-1.98298	0.367222	-0.015046	-0.213179	0.896468	0.0646229	-0.693829	0.762809	0.17437	-2.73414	0.22516	0.109747	-1.61631	0.462041	108.144
sp	Homo sapiens	A1X283	SPD2B_HUMAN	SH3PXD2B	SH3 and PX domain-containing protein 2B	cell junction [GO:0030054]; cell projection [GO:0042995]; cytoplasm [GO:0005737]; podosome [GO:0002102]	FALSE	10	171	157000000	4959500	5065500	5112900	5500400	5688600	5662000	7208600	6486900	6844400	8503200	8202100	7793300	5.04597e+06	5617000	6.84663e+06	8166200					0.154669	-3.50304	0.197747	0.440264	-13.5743	0.000710913	0.694534	-20.4766	8.41363e-06	0.285595	-8.95383	0.0300775	0.539865	-17.0502	0.000118117	0.25427	-7.7936	0.0186446	77.2634
sp	Homo sapiens	A2A2Y4	FRMD3_HUMAN	FRMD3	FERM domain-containing protein 3	cytoskeleton [GO:0005856]; integral component of membrane [GO:0016021]	FALSE	1	52.82	1700000	461040	545160	407750	367000	404510	378850	444850	416250	388830	370590	325960	380720	471317	383453	416643	359090					-0.297646	-5.27203	0.0827636	-0.177884	-1.67824	0.431143	-0.392351	-7.67322	0.0111834	0.119762	-2.60379	0.34616	-0.0947055	-1.35029	0.490038	-0.214467	-4.82831	0.0876132	113.104
sp	Homo sapiens	A2RRP1	NBAS_HUMAN	NBAS	Neuroblastoma-amplified sequence	cytosol [GO:0005829]; Dsl1/NZR complex [GO:0070939]; endoplasmic reticulum [GO:0005783]; endoplasmic reticulum membrane [GO:0005789]; membrane [GO:0016020]	FALSE	24	215.33	83300000	7247000	7352600	7463100	6848200	7017300	8271500	8397300	7287500	8427500	5038400	6775800	5944200	7.35423e+06	7379000	8.03743e+06	5.91947e+06					0.00485037	-0.0325167	0.988973	0.12816	-1.84173	0.395767	-0.313108	-5.56658	0.0395835	0.12331	-1.90164	0.465448	-0.317958	-5.48983	0.0466456	-0.441268	-8.62896	0.0123448	101.038
sp	Homo sapiens	A2RTX5	SYTC2_HUMAN	TARS3	Threonine--tRNA ligase 2 cytoplasmic	cytoplasm [GO:0005737]; nucleus [GO:0005634]	FALSE	1	29.86	576000	89888	96136	76090	91268	80663	83732	104580	88254	114280	78447	90242	77685	87371.3	85221	102371	82124.7					-0.035951	-0.163529	0.936092	0.22858	-3.09739	0.199995	-0.0893444	-0.937099	0.600479	0.264531	-3.43483	0.240737	-0.0533934	-0.709404	0.694546	-0.317924	-4.77597	0.0900483	100.69
sp	Homo sapiens	A2RU67	F234B_HUMAN	FAM234B	Protein FAM234B	cytoskeleton [GO:0005856]; integral component of membrane [GO:0016021]; postsynaptic Golgi apparatus [GO:0150051]	FALSE	4	151.37	49400000	1391200	1168000	1323400	1467300	1454400	1306300	1700000	1683600	1625600	1701800	2190500	1628900	1294200	1.40933e+06	1.66973e+06	1840400					0.122952	-1.99017	0.40767	0.367557	-6.80298	0.0260781	0.507959	-9.70326	0.00335735	0.244605	-3.61115	0.224296	0.385006	-6.47662	0.0267042	0.140402	-1.73812	0.436169	89.5574
sp	Homo sapiens	A2RUS2	DEND3_HUMAN	DENND3	DENN domain-containing protein 3	cytoplasmic vesicle [GO:0031410]; cytosol [GO:0005829]	FALSE	2	69.16	12100000	1142800	1116900	1055700	1180100	1133900	1362900	1233100	1255300	1281800	1107800	1059000	1106200	1.10513e+06	1.22563e+06	1.25673e+06	1091000					0.149307	-3.68708	0.179653	0.185458	-4.66454	0.08453	-0.0185693	-0.0385979	0.979866	0.0361511	-0.490505	0.838037	-0.167876	-3.60207	0.136613	-0.204027	-4.57562	0.0998525	97.7065
sp	Homo sapiens	A3KMH1	VWA8_HUMAN	VWA8	von Willebrand factor A domain-containing protein 8	cytoplasm [GO:0005737]; mitochondrion [GO:0005739]; peroxisome [GO:0005777]	FALSE	32	267.69	206000000	11821000	12149000	11330000	12391000	12911000	13674000	14256000	14075000	14538000	10194000	10996000	10802000	1.17667e+07	12992000	1.42897e+07	10664000					0.142918	-3.97152	0.157117	0.280267	-8.66192	0.00939499	-0.141957	-2.56719	0.23566	0.137349	-3.25077	0.260701	-0.284875	-7.89086	0.0120765	-0.422224	-12.394	0.00206157	95.1152
sp	Homo sapiens	A3KN83	SBNO1_HUMAN	SBNO1	Protein strawberry notch homolog 1	nucleus [GO:0005634]	FALSE	9	155.51	25800000	2556500	2743400	2598200	2615000	2807900	2803700	2829500	2419500	2870700	2576400	2908800	2583800	2632700	2742200	2.70657e+06	2.68967e+06					0.0587907	-0.522483	0.807354	0.0399208	-0.522483	0.779577	0.0308843	-0.522483	0.756971	-0.0188699	0	1	-0.0279064	-8.5051e-14	1	-0.00903654	-8.5051e-14	1	94.9389
sp	Homo sapiens	A4D1P6	WDR91_HUMAN	WDR91	WD repeat-containing protein 91	cytosol [GO:0005829]; early endosome membrane [GO:0031901]; extrinsic component of endosome membrane [GO:0031313]; late endosome membrane [GO:0031902]	FALSE	5	153.83	18200000	1280400	1344200	1326700	1358800	1399900	1559500	1682500	1559300	1840900	1379600	1449800	1435200	1317100	1439400	1.69423e+06	1.42153e+06					0.128103	-3.2153	0.225689	0.363268	-10.4915	0.0035484	0.110083	-3.2153	0.160779	0.235165	-5.85947	0.091346	-0.0180196	0	1	-0.253185	-5.85947	0.0508928	87.2167
sp	Homo sapiens	A4D1S0	KLRG2_HUMAN	KLRG2	Killer cell lectin-like receptor subfamily G member 2	integral component of membrane [GO:0016021]	TRUE	6	155.42	69500000	3606800	3252100	3305100	3374300	3260700	3203100	3356000	2627300	2960400	2343600	3122500	2282900	3388000	3.27937e+06	2.98123e+06	2583000	0.0547959	0.0719639	1.31165		-0.0470167	-0.825424	0.703312	-0.184525	-2.91337	0.22121	-0.391386	-6.90779	0.0176529	-0.137508	-1.60565	0.52686	-0.34437	-5.3044	0.0516749	-0.206862	-2.71548	0.263178	117.95
sp	Homo sapiens	A4FU01	MTMRB_HUMAN	MTMR11	Myotubularin-related protein 11	cytoplasm [GO:0005737]; extracellular exosome [GO:0070062]	TRUE	2	73.6	5030000	217560	257900	242750	225900	260780	243720	284160	279990	278190	276870	325240	264230	239403	243467	280780	288780	0.0393534	0.0540383	1.20625		0.024281	-0.540595	0.801339	0.229997	-4.95529	0.0720057	0.270528	-5.8504	0.0335247	0.205716	-3.87992	0.199081	0.246247	-4.7471	0.0710828	0.0405307	-0.425767	0.8297	82.6886
sp	Homo sapiens	A5D8V6	VP37C_HUMAN	VPS37C	Vacuolar protein sorting-associated protein 37C	endosome membrane [GO:0010008]; ESCRT I complex [GO:0000813]; extracellular exosome [GO:0070062]; host cell [GO:0043657]; intracellular membrane-bounded organelle [GO:0043231]; late endosome membrane [GO:0031902]	TRUE	1	33.79	549000	84514	104730	92026	115340	84294	96078	91318	83708	101530	97320	100280	103110	93756.7	98570.7	92185.3	100237					0.0722371	-0.972036	0.658143	-0.024384	-0.285155	0.873221	0.0964172	-1.53611	0.429478	-0.0966211	-1.39578	0.574977	0.0241801	-0.383469	0.821834	0.120801	-2.01454	0.378741	87.864
sp	Homo sapiens	A5PLL7	TM189_HUMAN	TMEM189	Plasmanylethanolamine desaturase	endoplasmic reticulum [GO:0005783]; endoplasmic reticulum membrane [GO:0005789]; integral component of membrane [GO:0016021]	FALSE	1	33.08	0	107340	97982	111460	90144	99220	91462	81553	68192	98527	78162	85238	89273	105594	93608.7	82757.3	84224.3					-0.173814	-2.4278	0.328191	-0.351569	-6.95119	0.0240677	-0.326219	-6.15892	0.0278428	-0.177755	-3.25396	0.260321	-0.152405	-2.5596	0.249453	0.0253499	-0.367078	0.845646	117.252
sp	Homo sapiens	A5YKK6	CNOT1_HUMAN	CNOT1	CCR4-NOT transcription complex subunit 1	CCR4-NOT complex [GO:0030014]; CCR4-NOT core complex [GO:0030015]; cytosol [GO:0005829]; extracellular space [GO:0005615]; membrane [GO:0016020]; nucleus [GO:0005634]; P-body [GO:0000932]; peroxisomal membrane [GO:0005778]	TRUE	45	330.68	760000000	18259000	19853000	17579000	19190000	20256000	20918000	22951000	20640000	22418000	16722000	19299000	18277000	1.85637e+07	2.01213e+07	22003000	1.80993e+07	0.0144218	0.0227444	1.21568		0.116244	-2.37748	0.336045	0.245219	-6.33054	0.0338763	-0.0365451	-0.758347	0.663157	0.128974	-2.75851	0.321637	-0.152789	-3.70171	0.12926	-0.281764	-7.82657	0.0183684	92.7002
sp	Homo sapiens	A6NCE7	MP3B2_HUMAN	MAP1LC3B2	Microtubule-associated proteins 1A/1B light chain 3 beta 2	autophagosome [GO:0005776]; autophagosome membrane [GO:0000421]; cytoplasmic vesicle [GO:0031410]; cytosol [GO:0005829]; endomembrane system [GO:0012505]; intracellular membrane-bounded organelle [GO:0043231]; microtubule [GO:0005874]	FALSE	1	45.59	1620000	57689	71506	62353	90182	91118	126590	206660	207720	149320	214160	140950	184820	63849.3	102630	187900	179977					0.684709	-8.87598	0.0134327	1.55722	-19.939	2.55759e-05	1.49507	-18.9349	1.90106e-05	0.872513	-11.8688	0.0114298	0.810357	-10.4636	0.00291081	-0.0621552	-0.770739	0.706027	43.1839
sp	Homo sapiens	A6NCS6	CB072_HUMAN	C2orf72	Uncharacterized protein C2orf72	0	FALSE	9	193.28	390000000	6368200	5357700	5364500	6573600	7092300	6808200	6551800	5601300	5932100	6439400	6287300	5208500	5696800	6824700	6028400	5978400					0.260614	-4.72825	0.107994	0.0816234	-0.609669	0.746241	0.0696077	-0.609669	0.719412	-0.17899	-3.54851	0.229388	-0.191006	-3.54851	0.140407	-0.0120157	0	1	103.851
sp	Homo sapiens	A6ND36	FA83G_HUMAN	FAM83G	Protein FAM83G	cytosol [GO:0005829]; nucleus [GO:0005634]	FALSE	2	61.41	0	122240	128510	117840	127230	97701	130160	128950	119090	138340	137670	160050	126610	122863	118364	128793	141443					-0.0538281	-0.242153	0.906185	0.0680035	-1.40291	0.497795	0.20317	-3.94873	0.104896	0.121832	-1.80166	0.48401	0.256998	-4.46438	0.0834166	0.135166	-1.80166	0.422038	95.6001
sp	Homo sapiens	A6NDG6	PGP_HUMAN	PGP	Glycerol-3-phosphate phosphatase	cytoplasm [GO:0005737]	FALSE	3	85.54	5630000	678410	707120	710910	647000	589320	662850	686510	808540	692310	909750	883140	922830	698813	633057	729120	905240					-0.142572	-3.50303	0.197747	0.0612491	-1.04809	0.595295	0.373393	-11.8178	0.000986183	0.203822	-5.38576	0.10997	0.515966	-16.0355	0.000189549	0.312144	-9.98899	0.0062844	91.4845
sp	Homo sapiens	A6NED2	RCCD1_HUMAN	RCCD1	RCC1 domain-containing protein 1	chromosome [GO:0005694]; cytosol [GO:0005829]; plasma membrane [GO:0005886]	TRUE	1	48.55	178000	9010	10049	16226	7564.9	11406	10381	13507	8678	9664.8	10789	9283.8	7265.1	11761.7	9783.97	10616.6	9112.63					-0.265601	-1.46961	0.522631	-0.147771	-0.738099	0.698053	-0.368153	-2.33109	0.270836	0.11783	-0.537097	0.823494	-0.102551	-0.537097	0.767831	-0.220382	-1.22346	0.564432	87.3171
tR	Homo sapiens	A6NEM2	A6NEM2_HUMAN	HCFC1	Host cell factor 1	MLL1 complex [GO:0071339]; Set1C/COMPASS complex [GO:0048188]	FALSE	1	28.84	825000	94877	114270	127850	131170	80462	117320	84174	71256	131080	97376	174070	98393	112332	109651	95503.3	123280					-0.0348587	-0.314497	0.881166	-0.23415	-1.58283	0.451678	0.134162	-0.483842	0.773513	-0.199292	-1.10179	0.647367	0.16902	-0.883354	0.630735	0.368312	-2.37898	0.313137	86.1019
sp	Homo sapiens	A6NFA1	TIKI2_HUMAN	TRABD2B	Metalloprotease TIKI2	integral component of organelle membrane [GO:0031301]; integral component of plasma membrane [GO:0005887]; membrane [GO:0016020]	TRUE	1	34.65	8480000	640320	501280	608190	396230	576020	623230	639450	569870	587720	883490	730830	894610	583263	531827	599013	836310					-0.133191	-1.90897	0.423462	0.0384407	-0.461698	0.801619	0.51989	-8.22291	0.00803787	0.171632	-2.70836	0.328774	0.653082	-11.2577	0.00190173	0.48145	-7.25446	0.0243797	100.426
tR	Homo sapiens	A6NFX8	A6NFX8_HUMAN	NUDT5	ADP-sugar pyrophosphatase	0	FALSE	1	43.34	11800000	840260	955000	835810	974130	1133700	1144700	1558500	1243400	1402300	1699900	1795700	1778500	877023	1.08418e+06	1401400	1.75803e+06					0.305913	-5.50748	0.073084	0.676182	-14.3116	0.000491185	1.00328	-21.0011	6.52791e-06	0.370269	-7.76145	0.0459303	0.697363	-16.1156	0.000181697	0.327094	-7.76145	0.0189543	65.6372
sp	Homo sapiens	A6NHQ2	FBLL1_HUMAN	FBLL1	rRNA/tRNA 2'-O-methyltransferase fibrillarin-like protein 1	box C/D snoRNP complex [GO:0031428]; Cajal body [GO:0015030]; fibrillar center [GO:0001650]; nucleoplasm [GO:0005654]; small-subunit processome [GO:0032040]	FALSE	2	124.05	409000000	6031000	6237500	5972300	5806700	5641500	5826800	6886400	6350400	6569800	5318500	5608900	5780300	6.08027e+06	5.75833e+06	6602200	5.56923e+06					-0.0784833	-1.0632	0.632439	0.118812	-2.39613	0.293521	-0.126656	-2.83809	0.201187	0.197296	-4.18161	0.177384	-0.0481726	-1.27553	0.51063	-0.245468	-6.44457	0.0370872	100.475
sp	Homo sapiens	A6NHR9	SMHD1_HUMAN	SMCHD1	Structural maintenance of chromosomes flexible hinge domain-containing protein 1	Barr body [GO:0001740]; site of double-strand break [GO:0035861]	FALSE	4	83.94	3940000	811640	850550	834040	787180	774930	830100	856490	812050	873070	791160	856760	749890	832077	797403	847203	799270					-0.0614068	-0.537545	0.802306	0.0259918	-0.00928916	0.996535	-0.0580335	-1.23979	0.50901	0.0873986	-0.549857	0.820004	0.0033733	-0.549857	0.763458	-0.0840253	-1.25507	0.556088	99.1028
sp	Homo sapiens	A6NHT5	HMX3_HUMAN	HMX3	Homeobox protein HMX3	nuclear chromatin [GO:0000790]	FALSE	1	87.53	8850000	216390	231490	207870	138790	168290	157180	171290	174170	242250	149380	150740	189180	218583	154753	195903	163100					-0.498213	-7.61156	0.0252393	-0.158041	-2.07961	0.348082	-0.422427	-6.9634	0.0170871	0.340171	-4.26715	0.173003	0.0757863	-0.295022	0.856761	-0.264385	-3.65526	0.161315	118.191
sp	Homo sapiens	A6NIH7	U119B_HUMAN	UNC119B	Protein unc-119 homolog B	ciliary transition zone [GO:0035869]; cilium [GO:0005929]; cytosol [GO:0005829]	FALSE	1	53.38	1180000	149800	137540	139940	104160	103550	142470	149280	121310	127580	149420	141700	126460	142427	116727	132723	139193					-0.287085	-4.73459	0.10781	-0.101797	-1.04739	0.595354	-0.0331292	-0.604454	0.721646	0.185288	-2.90769	0.302344	0.253956	-3.56301	0.139431	0.0686681	-0.334171	0.853726	112.829
sp	Homo sapiens	A6NJ78	MET15_HUMAN	METTL15	Probable methyltransferase-like protein 15	mitochondrial matrix [GO:0005759]	FALSE	2	116.58	4830000	391990	418630	450090	465250	400210	463410	352920	394790	469280	406280	406650	309100	420237	442957	405663	374010					0.0759635	-0.407633	0.845948	-0.0509191	-1.02296	0.60298	-0.168125	-3.22039	0.160362	-0.126883	-1.62868	0.521383	-0.244089	-4.02567	0.107417	-0.117206	-1.62868	0.458951	95.4405
sp	Homo sapiens	A6NKD9	CC85C_HUMAN	CCDC85C	Coiled-coil domain-containing protein 85C	adherens junction [GO:0005912]; apical junction complex [GO:0043296]; bicellular tight junction [GO:0005923]	FALSE	3	101.42	12800000	530470	711820	456940	367180	409830	371460	367710	327550	371050	330510	391850	387930	566410	382823	355437	370097					-0.565168	-8.675	0.0150097	-0.672254	-10.49	0.0035484	-0.613945	-9.28802	0.00428268	-0.107086	-0.996383	0.673381	-0.0487766	-0.284281	0.861033	0.0583096	-0.616592	0.767475	126.697
sp	Homo sapiens	A6NKF1	SAC31_HUMAN	SAC3D1	SAC3 domain-containing protein 1	centrosome [GO:0005813]; cytoplasm [GO:0005737]; nucleus [GO:0005634]; spindle [GO:0005819]	FALSE	2	101.36	20200000	956600	972170	936660	1008200	1003800	1019500	948280	929260	1074100	795470	1023300	878380	955143	1010500	983880	899050					0.0812802	-0.966703	0.659468	0.0427651	-0.453428	0.804794	-0.0873159	-1.45246	0.450563	-0.0385151	-0.41111	0.854315	-0.168596	-2.92747	0.201536	-0.130081	-2.18515	0.34642	99.4239
sp	Homo sapiens	A6NNY8	UBP27_HUMAN	USP27X	Ubiquitin carboxyl-terminal hydrolase 27	cytosol [GO:0005829]; nucleus [GO:0005634]	FALSE	1	45.28	97900000	859370	777630	657200	690100	662270	718360	906710	632760	856400	800120	943860	927120	764733	690243	798623	890367					-0.147852	-1.37138	0.546017	0.0625585	-0.777241	0.684966	0.219443	-2.7416	0.212387	0.21041	-2.56457	0.351508	0.367295	-5.01485	0.0607609	0.156884	-1.5194	0.485123	109.336
sp	Homo sapiens	A6QL63	BTBDB_HUMAN	BTBD11	Ankyrin repeat and BTB/POZ domain-containing protein BTBD11	integral component of membrane [GO:0016021]	TRUE	7	143.82	79600000	3086400	3505600	3420900	3462000	3412800	3833500	4349300	4166500	4188900	4238800	4127000	3801300	3.33763e+06	3.56943e+06	4234900	4055700	0.00250324	0.00543547	1.26883		0.0968696	-1.64351	0.480979	0.343502	-9.85892	0.00492863	0.281125	-7.72877	0.0108071	0.246633	-7.09108	0.0579662	0.184256	-4.9283	0.0639883	-0.062377	-1.18951	0.575273	81.2335
sp	Homo sapiens	A7E2V4	ZSWM8_HUMAN	ZSWIM8	Zinc finger SWIM domain-containing protein 8	Cul2-RING ubiquitin ligase complex [GO:0031462]	FALSE	4	87.72	7230000	656580	675150	568460	528850	537220	600920	522410	417420	509440	341780	420930	385710	633397	555663	483090	382807					-0.188898	-2.94728	0.255559	-0.390817	-6.70604	0.0274541	-0.726493	-14.0104	0.00028445	-0.201919	-2.5107	0.358698	-0.537595	-10.0491	0.00364585	-0.335676	-6.19982	0.042099	127.804
sp	Homo sapiens	A7KAX9	RHG32_HUMAN	ARHGAP32	Rho GTPase-activating protein 32	actin cytoskeleton [GO:0015629]; cell cortex [GO:0005938]; cytosol [GO:0005829]; dendritic spine [GO:0043197]; endoplasmic reticulum membrane [GO:0005789]; endosome membrane [GO:0010008]; fibrillar center [GO:0001650]; Golgi apparatus [GO:0005794]; Golgi membrane [GO:0000139]; nucleoplasm [GO:0005654]; postsynaptic density [GO:0014069]	FALSE	1	35.51	0	20808	40870	25784	25900	21299	22348	24931	25288	31959	17071	29860	24723	29154	23182.3	27392.7	23884.7					-0.330668	-1.81992	0.441287	-0.0899041	-0.195332	0.912062	-0.287609	-1.54126	0.428362	0.240764	-1.49058	0.553442	0.043059	-0.162909	0.923099	-0.197705	-1.22911	0.562711	80.3292
sp	Homo sapiens	A7MBM2	DISP2_HUMAN	DISP2	Protein dispatched homolog 2	integral component of membrane [GO:0016021]; plasma membrane [GO:0005886]	TRUE	2	72.21	3950000	243120	226400	275770	275460	270850	263790	273610	248300	321940	250790	293830	236400	248430	270033	281283	260340	0.518282	0.541597	1.13224		0.120298	-1.28778	0.569433	0.179185	-2.42955	0.288257	0.0675576	-0.804299	0.645983	0.0588866	-0.752897	0.740606	-0.0527405	-0.342656	0.836171	-0.111627	-1.22906	0.562711	91.7359
sp	Homo sapiens	A8CG34	P121C_HUMAN	POM121C	Nuclear envelope pore membrane protein POM 121C	endoplasmic reticulum membrane [GO:0005789]; host cell [GO:0043657]; integral component of membrane [GO:0016021]; nuclear envelope [GO:0005635]; nuclear membrane [GO:0031965]; nuclear pore [GO:0005643]	FALSE	7	162.72	34600000	1959000	1999400	1781800	1444900	1680600	1482000	1523600	1568600	1455800	1004400	1137800	1042500	1913400	1.53583e+06	1516000	1.06157e+06					-0.317117	-8.06605	0.0200722	-0.335869	-9.08882	0.00735519	-0.849944	-21.8959	4.08736e-06	-0.0187519	-0.497177	0.836349	-0.532827	-15.2752	0.000263818	-0.514075	-14.4324	0.000906273	130.019
tR	Homo sapiens	A8MQB8	A8MQB8_HUMAN	FMR1	Synaptic functional regulator FMR1	chromosome, centromeric region [GO:0000775]; cytoplasmic stress granule [GO:0010494]; cytosol [GO:0005829]; dendritic spine [GO:0043197]; filopodium tip [GO:0032433]; growth cone [GO:0030426]; nucleolus [GO:0005730]; perikaryon [GO:0043204]; perinuclear region of cytoplasm [GO:0048471]; plasma membrane [GO:0005886]	TRUE	1	74.85	3350000	15434	16989	12891	17394	13068	14536	18900	18142	12231	24114	21575	30489	15104.7	14999.3	16424.3	25392.7					-0.010096	-0.11765	0.956036	0.12084	-0.637039	0.736271	0.749418	-10.0474	0.00274682	0.130936	-0.797484	0.727023	0.759514	-10.3067	0.00314442	0.628577	-8.79788	0.0113618	85.8386
tR	Homo sapiens	A8MSY1	A8MSY1_HUMAN	STIMATE-MUSTN1	STIMATE-MUSTN1 readthrough	integral component of membrane [GO:0016021]; nucleus [GO:0005634]	FALSE	1	38.18	1320000	100270	101810	89529	184410	138710	188680	217650	231140	155410	229050	176330	373620	97203	170600	201400	259667					0.811545	-7.51741	0.0264325	1.05099	-9.79064	0.00510332	1.41759	-13.313	0.000421151	0.239446	-1.28589	0.601205	0.606043	-4.58858	0.0777869	0.366597	-2.47346	0.298253	55.0277
sp	Homo sapiens	A8MVS5	HIDE1_HUMAN	HIDE1	Protein HIDE1	integral component of membrane [GO:0016021]	TRUE	1	65.34	10900000	1116400	774130	911880	1014200	918720	940940	1160100	651500	701520	600580	723460	477950	934137	957953	837707	600663					0.0363217	-0.269533	0.896565	-0.157188	-1.68543	0.429703	-0.637077	-6.46246	0.0232006	-0.19351	-2.15034	0.42073	-0.673399	-7.05973	0.0192557	-0.479889	-3.66284	0.160766	134.084
sp	Homo sapiens	A8MVW0	F1712_HUMAN	FAM171A2	Protein FAM171A2	integral component of membrane [GO:0016021]	TRUE	8	204.4	70800000	3788400	3328600	3807900	3361300	3488900	3269200	2820900	2510500	2866400	2253800	2491100	2037200	3.64163e+06	3.37313e+06	2732600	2260700	0.000197563	0.000789003	1.61084	2	-0.110496	-3.05563	0.243506	-0.414311	-10.6125	0.00332982	-0.687816	-17.8259	3.37379e-05	-0.303815	-6.16546	0.0811365	-0.57732	-14.3408	0.000409844	-0.273505	-7.13704	0.0258245	126.195
sp	Homo sapiens	A8MWD9	RUXGL_HUMAN	SNRPGP15	Putative small nuclear ribonucleoprotein G-like protein 15	catalytic step 2 spliceosome [GO:0071013]; P granule [GO:0043186]; precatalytic spliceosome [GO:0071011]; ribonucleoprotein complex [GO:1990904]; SMN-Sm protein complex [GO:0034719]; spliceosomal tri-snRNP complex [GO:0097526]; U12-type spliceosomal complex [GO:0005689]; U1 snRNP [GO:0005685]; U2 snRNP [GO:0005686]; U2-type prespliceosome [GO:0071004]; U4 snRNP [GO:0005687]; U5 snRNP [GO:0005682]	FALSE	4	118.46	36800000	1615500	1613000	1151600	1338500	1442600	1597800	1520300	1117500	1399200	1665000	2444800	1513500	1.46003e+06	1.45963e+06	1.34567e+06	1.87443e+06					-0.000395304	-0.415515	0.842389	-0.11768	-0.815839	0.671061	0.360453	-3.80051	0.114586	-0.117285	-1.40029	0.573875	0.360849	-2.99336	0.19379	0.478133	-5.33865	0.0672834	105.248
sp	Homo sapiens	A8MWY0	K132L_HUMAN	KIAA1324L	UPF0577 protein KIAA1324-like	integral component of membrane [GO:0016021]; plasma membrane [GO:0005886]	TRUE	2	55.37	220000	105270	117380	95110	140220	170830	142100	159230	146840	170150	128360	188480	212450	105920	151050	158740	176430	0.0215932	0.032269	1.66569	4	0.512051	-7.19958	0.0307413	0.583691	-8.87907	0.00831	0.736121	-10.5097	0.0020946	0.0716395	-0.878224	0.704578	0.22407	-2.08793	0.324766	0.15243	-0.878224	0.670324	71.1116
sp	Homo sapiens	A8MXV4	NUD19_HUMAN	NUDT19	Nucleoside diphosphate-linked moiety X motif 19	cytosol [GO:0005829]; peroxisomal matrix [GO:0005782]	FALSE	5	131.83	73100000	1341200	1451800	1547300	1602900	1592200	1769400	1531400	1835600	1752500	1724600	1737700	1705800	1.44677e+06	1.65483e+06	1706500	1722700					0.193854	-3.46772	0.201649	0.238208	-3.46772	0.16283	0.251839	-4.35132	0.0821912	0.0443545	0	1	0.0579856	-0.444109	0.801812	0.0136311	-0.444109	0.825261	82.1461
sp	Homo sapiens	B0YJ81	HACD1_HUMAN	HACD1	Very-long-chain (3R)-3-hydroxyacyl-CoA dehydratase 1	endoplasmic reticulum [GO:0005783]; endoplasmic reticulum membrane [GO:0005789]; integral component of endoplasmic reticulum membrane [GO:0030176]	FALSE	2	49.59	7230000	163820	148340	169670	175810	181990	188760	161070	172750	188650	146100	156230	154730	160610	182187	174157	152353					0.181856	-3.95623	0.157971	0.116824	-2.09587	0.345261	-0.0761407	-1.00045	0.579987	-0.0650317	-1.14929	0.635908	-0.257996	-5.79557	0.0392251	-0.192965	-3.74352	0.154725	97.9043
tR	Homo sapiens	B1AK87	B1AK87_HUMAN	CAPZB	F-actin-capping protein subunit beta	F-actin capping protein complex [GO:0008290]; sarcomere [GO:0030017]	FALSE	2	56.4	89200000	879730	881630	884170	957330	983830	1008800	1017400	1085500	889630	1241900	1451000	1424000	881843	983320	997510	1372300					0.157139	-2.97297	0.2526	0.177809	-3.87274	0.13062	0.638002	-15.7302	0.000107038	0.0206703	-0.468516	0.843293	0.480863	-11.9944	0.00132488	0.460193	-11.0921	0.00365851	83.0919
tR	Homo sapiens	B1ALK7	B1ALK7_HUMAN	ARHGEF7	Rho guanine nucleotide exchange factor 7	lamellipodium [GO:0030027]	FALSE	1	36.08	2470000	52636	57789	56221	63223	43706	57787	44578	50710	42591	45430	43500	35753	55548.7	54905.3	45959.7	41561					-0.016806	-0.737377	0.731615	-0.273384	-4.56208	0.089318	-0.418522	-7.21735	0.0146407	-0.256578	-3.19214	0.267975	-0.401716	-5.75629	0.0401167	-0.145138	-1.54295	0.478886	106.349
sp	Homo sapiens	B2RTY4	MYO9A_HUMAN	MYO9A	Unconventional myosin-IXa	axonal growth cone [GO:0044295]; cytosol [GO:0005829]; integral component of membrane [GO:0016021]; synapse [GO:0045202]; unconventional myosin complex [GO:0016461]	FALSE	9	153.62	27300000	2607900	2698500	2585200	2592400	2368100	2691500	2827300	2593900	2686300	2057700	2295900	2150100	2.63053e+06	2.55067e+06	2702500	2167900					-0.044481	-0.338272	0.871895	0.0389393	-0.803685	0.675617	-0.279057	-8.35639	0.0074418	0.0834202	-1.28109	0.602247	-0.234576	-7.62634	0.0139998	-0.317996	-9.88882	0.00655997	103.78
tR	Homo sapiens	B4DDD6	B4DDD6_HUMAN	DBNL	Drebrin-like protein	cell cortex [GO:0005938]; clathrin-coated vesicle membrane [GO:0030665]; dendrite [GO:0030425]; early endosome [GO:0005769]; Golgi membrane [GO:0000139]; lamellipodium [GO:0030027]; perikaryon [GO:0043204]; plasma membrane [GO:0005886]; podosome [GO:0002102]; postsynaptic density [GO:0014069]; ruffle [GO:0001726]	TRUE	1	59.9	382000	8843.7	6676.1	7519.7	9798.6	8712.5	12858	8981.8	8170.7	8534.5	12785	19609	12142	7679.83	10456.4	8562.33	14845.3					0.445235	-5.02003	0.0937443	0.156929	-1.30888	0.52293	0.950863	-11.497	0.00118568	-0.288306	-2.82362	0.313167	0.505628	-5.04232	0.0599085	0.793934	-9.27646	0.00887512	85.1505
tR	Homo sapiens	B4E3T4	B4E3T4_HUMAN	RBPMS	HCG2043421 isoform CRA_c	cytosol [GO:0005829]; nucleoplasm [GO:0005654]	FALSE	1	32.78	23100000	348710	359960	339420	303480	340150	380950	377130	318000	353120	273810	257060	237160	349363	341527	349417	256010					-0.03273	-0.761522	0.724139	0.000220223	-0.246015	0.890288	-0.448528	-10.3259	0.00234308	0.0329502	-0.451653	0.845222	-0.415798	-8.87636	0.00701853	-0.448748	-9.80242	0.00685186	107.6
sp	Homo sapiens	B7Z368	CJ142_HUMAN	C10orf142	Uncharacterized protein C10orf142	0	FALSE	1	29.36	0	43498	29212	41805	37713	48525	63550	41035	27704	50747	30052	55174	34709	38171.7	49929.3	39828.7	39978.3					0.387385	-2.47707	0.320081	0.061305	-0.0933266	0.9563	0.0667161	-0.246351	0.879272	-0.32608	-2.29605	0.395088	-0.320669	-2.02844	0.335482	0.00541114	-0.144267	0.945693	103.623
sp	Homo sapiens	B7ZAP0	RBG10_HUMAN	RABGAP1L	Rab GTPase-activating protein 1-like isoform 10	0	FALSE	1	104.13	402000	177040	187880	182000	194920	226280	220910	234560	221580	246360	219330	225450	216370	182307	214037	234167	220383					0.231491	-6.95758	0.0344614	0.361168	-10.1883	0.00418235	0.273648	-6.95758	0.0171361	0.129678	-2.01066	0.44447	0.0421572	0	1	-0.0875206	-2.01066	0.37949	83.2255
tR	Homo sapiens	B7ZKQ9	B7ZKQ9_HUMAN	SCARB1	SCARB1 protein	integral component of membrane [GO:0016021]; intracellular membrane-bounded organelle [GO:0043231]	FALSE	2	50.29	1750000000	11920000	9849900	12332000	9112400	7941500	9381400	9524900	7570900	8131000	9019100	12814000	9144600	11367300	8.81177e+06	8.40893e+06	10325900					-0.367386	-5.28587	0.0822607	-0.434895	-5.8896	0.0434706	-0.138622	-1.96654	0.335024	-0.0675085	-0.275164	0.888083	0.228764	-2.30092	0.288198	0.296273	-2.81636	0.249737	122.527
tR	Homo sapiens	B8ZZC5	B8ZZC5_HUMAN	GLS	Glutaminase kidney isoform mitochondrial	0	FALSE	1	41.85	12600000	90707	77080	94247	105270	79083	85950	91703	72317	72723	63399	71964	51038	87344.7	90101	78914.3	62133.7					0.0448235	-0.463791	0.824235	-0.146432	-1.45548	0.48433	-0.491344	-7.42681	0.0129888	-0.191256	-2.20434	0.411385	-0.536168	-8.39739	0.00912053	-0.344912	-4.88365	0.0853658	113.92
sp	Homo sapiens	C4AMC7	WASH3_HUMAN	WASH3P	Putative WAS protein family homolog 3	autophagosome [GO:0005776]; centriole [GO:0005814]; cytosol [GO:0005829]; early endosome [GO:0005769]; early endosome membrane [GO:0031901]; filopodium [GO:0030175]; lamellipodium [GO:0030027]; recycling endosome [GO:0055037]; recycling endosome membrane [GO:0055038]; WASH complex [GO:0071203]	FALSE	2	131.82	8460000	132900	142540	142710	119460	131230	129660	144960	132800	179120	142210	166400	115760	139383	126783	152293	141457					-0.136693	-1.13088	0.61267	0.127795	-1.38987	0.500769	0.0213021	-0.0578498	0.971054	0.264488	-3.07263	0.28134	0.157995	-1.04098	0.579976	-0.106493	-1.48751	0.493981	94.9427
tR	Homo sapiens	C9J0J7	C9J0J7_HUMAN	PFN2	Profilin	cytoskeleton [GO:0005856]	FALSE	1	52.47	4920000	302460	368640	292080	283310	337560	332960	336380	312660	389850	442450	427490	446520	321060	317943	346297	438820					-0.0140733	-0.340066	0.871748	0.109166	-2.00477	0.363033	0.450786	-9.68552	0.00339149	0.123239	-2.61244	0.344336	0.46486	-10.3913	0.00302836	0.341621	-6.43968	0.0371879	84.9535
tR	Homo sapiens	C9JFP8	C9JFP8_HUMAN	SHANK2	SH3 and multiple ankyrin repeat domains protein 2	0	FALSE	1	36.17	4360000	88705	108080	87933	80582	87531	92977	84222	86233	94789	111160	147010	133600	94906	87030	88414.7	130590					-0.124987	-1.40875	0.536428	-0.102214	-0.891995	0.645855	0.460473	-9.79412	0.00318579	0.0227729	-0.357837	0.864216	0.58546	-12.1122	0.00123895	0.562687	-11.4086	0.00320036	88.4969
sp	Homo sapiens	C9JI98	TM238_HUMAN	TMEM238	Transmembrane protein 238	integral component of membrane [GO:0016021]	TRUE	1	38.36	6980000	131930	143460	129420	150430	144950	146310	126210	144120	137250	199970	207460	202160	134937	147230	135860	203197					0.125789	-2.5991	0.302962	0.00983833	-0.142865	0.933527	0.590594	-16.455	7.09942e-05	-0.115951	-2.88266	0.305734	0.464805	-13.2067	0.000704297	0.580756	-16.7026	0.000368839	84.9485
tR	Homo sapiens	C9JLD7	C9JLD7_HUMAN	TRIP12	E3 ubiquitin-protein ligase TRIP12 (Fragment)	0	FALSE	1	41.6	1600000	35750	36246	44991	35208	34076	41590	34177	37803	36907	35429	35047	29409	38995.7	36958	36295.7	33295					-0.0774271	-0.977433	0.656958	-0.103517	-0.977433	0.618292	-0.228008	-4.06	0.0980925	-0.0260894	-1.72985e-14	1	-0.150581	-2.40003	0.27232	-0.124492	-2.40003	0.310062	98.2518
sp	Homo sapiens	C9JLW8	MCRI1_HUMAN	MCRIP1	Mapk-regulated corepressor-interacting protein 1	cytoplasm [GO:0005737]; cytoplasmic stress granule [GO:0010494]; nucleus [GO:0005634]	FALSE	1	72.74	1170000	156140	171110	149180	151390	155460	186720	172180	140410	166270	196630	164290	162420	158810	164523	159620	174447					0.0509904	-0.049692	0.981916	0.00733967	-0.292813	0.870476	0.135484	-1.34757	0.479014	-0.0436508	-0.351728	0.864987	0.0844938	-1.26585	0.513175	0.128145	-1.82122	0.418372	95.0046
tR	Homo sapiens	C9JRP1	C9JRP1_HUMAN	SLC4A7	Anion exchange protein (Fragment)	integral component of membrane [GO:0016021]	TRUE	1	83.03	191000000	453300	389020	441070	390020	380130	409350	355800	307490	353480	241870	339570	242810	427797	393167	338923	274750					-0.121784	-1.99348	0.40725	-0.335966	-6.53836	0.0301506	-0.638806	-11.9163	0.000929369	-0.214182	-3.36456	0.248515	-0.517022	-8.82665	0.00722003	-0.302839	-4.01145	0.1343	126.387
tR	Homo sapiens	D6RD18	D6RD18_HUMAN	HNRNPAB	Heterogeneous nuclear ribonucleoprotein A/B	cytoplasm [GO:0005737]; nucleoplasm [GO:0005654]	FALSE	2	70.03	23200000	226690	376120	165190	200970	238320	230140	303270	202390	203190	236240	349850	267760	256000	223143	236283	284617					-0.198173	-0.527836	0.805383	-0.115626	-0.347592	0.847487	0.152876	-1.05853	0.56229	0.0825472	-0.148832	0.950764	0.351049	-1.8399	0.371375	0.268502	-1.58281	0.469516	90.6721
tR	Homo sapiens	E7EMF1	E7EMF1_HUMAN	ITGA2	Integrin alpha-2	integrin complex [GO:0008305]	FALSE	1	72.16	15700000000	37594000	22501000	35629000	40049000	38349000	43366000	37284000	31681000	40691000	37258000	46552000	28715000	31908000	40588000	36552000	3.75083e+07					0.347135	-3.63311	0.184834	0.196032	-1.76245	0.413186	0.233293	-2.10551	0.308926	-0.151103	-1.20425	0.620461	-0.113842	-0.917282	0.619334	0.0372608	-0.19408	0.916586	102.606
tR	Homo sapiens	E7EMZ9	E7EMZ9_HUMAN	TACC2	Transforming acidic coiled-coil-containing protein 2	cytosol [GO:0005829]; microtubule organizing center [GO:0005815]; nucleoplasm [GO:0005654]; plasma membrane [GO:0005886]	TRUE	1	43.29	1140000	60959	68928	67729	63471	70197	56660	80197	69509	59905	78572	75729	84520	65872	63442.7	69870.3	79607					-0.0542119	-0.261116	0.900088	0.0850147	-1.49109	0.475908	0.27323	-5.77807	0.0350159	0.139227	-1.92716	0.461654	0.327442	-6.35648	0.0284462	0.188215	-3.27624	0.196098	87.4616
tR	Homo sapiens	E7EN19	E7EN19_HUMAN	MAP4K4	Mitogen-activated protein kinase kinase kinase kinase 4	0	FALSE	1	31.44	4110000	96295	123410	112510	117040	112690	118330	152500	140260	157210	176270	197130	178840	110738	116020	149990	184080					0.0672188	-0.887811	0.684266	0.437712	-10.1094	0.00437077	0.733178	-16.3854	7.34328e-05	0.370493	-8.44902	0.0354891	0.665959	-15.0477	0.000290351	0.295467	-5.71354	0.0548689	68.6806
tR	Homo sapiens	E7EQT4	E7EQT4_HUMAN	ACIN1	Apoptotic chromatin condensation inducer in the nucleus	cytosol [GO:0005829]; nucleoplasm [GO:0005654]; plasma membrane [GO:0005886]	TRUE	1	32.23	19100000	143930	147500	153000	165650	182620	194160	204570	189460	230700	193930	245850	234270	148143	180810	208243	224683					0.287481	-6.06417	0.0550825	0.491277	-10.1316	0.00431062	0.600899	-13.1383	0.000463599	0.203796	-2.70009	0.32978	0.313419	-5.82037	0.0387275	0.109623	-2.01767	0.378011	75.5657
tR	Homo sapiens	E7ESV6	E7ESV6_HUMAN	ADGRL3	Adhesion G protein-coupled receptor L3	axon [GO:0030424]; integral component of membrane [GO:0016021]; plasma membrane [GO:0005886]	TRUE	1	40.71	426000	24989	25223	32359	20757	24929	33432	34407	28037	27405	30750	25488	22184	27523.7	26372.7	29949.7	26140.7					-0.0616292	-0.803737	0.710346	0.121867	-0.970955	0.619662	-0.0743767	-0.803737	0.646008	0.183496	-2.1087	0.428141	-0.0127475	-2.16231e-14	1	-0.196244	-2.1087	0.360489	90.8801
sp	Homo sapiens	E9PAV3	NACAM_HUMAN	NACA	Nascent polypeptide-associated complex subunit alpha muscle-specific form	cytoplasm [GO:0005737]; nascent polypeptide-associated complex [GO:0005854]; nucleus [GO:0005634]	FALSE	5	156.84	156000000	2055900	1943900	2187300	3856400	4760300	3911100	4706700	4123900	4298600	5787500	5879100	5288100	2.06237e+06	4.17593e+06	4376400	5.65157e+06					1.0178	-20.7271	3.35826e-05	1.08544	-21.7503	9.56639e-06	1.45435	-26.591	4.9274e-07	0.0676459	-0.874506	0.705541	0.436552	-9.34129	0.00542845	0.368906	-7.67859	0.0197087	50.5562
tR	Homo sapiens	E9PFN4	E9PFN4_HUMAN	SLC4A7	Anion exchange protein	integral component of membrane [GO:0016021]	TRUE	1	53.4	30000000	1013100	948200	1235800	741240	908360	904400	840160	637450	712090	373930	721690	291340	1065700	851333	729900	462320					-0.324005	-2.0834	0.389136	-0.546031	-4.28895	0.103666	-1.20484	-11.8632	0.000960434	-0.222025	-1.40134	0.573728	-0.880832	-8.65785	0.00792366	-0.658807	-6.18827	0.0423351	130.334
tR	Homo sapiens	E9PKU7	E9PKU7_HUMAN	GANAB	Neutral alpha-glucosidase AB	0	FALSE	1	44.66	4700000	480470	429260	592370	575950	541740	597560	704870	776010	738300	642270	621090	649200	500700	571750	739727	637520					0.191438	-2.45729	0.323779	0.563046	-11.5112	0.00205501	0.348524	-6.16313	0.027779	0.371608	-7.82381	0.0452083	0.157086	-2.53333	0.252936	-0.214522	-3.94563	0.138853	78.4538
tR	Homo sapiens	E9PMV1	E9PMV1_HUMAN	PLEC	Plectin (Fragment)	cytoskeleton [GO:0005856]	FALSE	1	42.74	15700000	492460	442900	356230	447000	319370	289910	294630	554860	447540	415170	366900	450600	430530	352093	432343	410890					-0.290156	-2.13749	0.379027	0.00606367	-0.0744117	0.964929	-0.0673616	-0.0978621	0.95114	0.29622	-2.27949	0.397573	0.222794	-1.95625	0.348917	-0.0734252	-0.177094	0.926381	121.157
tR	Homo sapiens	E9PQX8	E9PQX8_HUMAN	MFF	Mitochondrial fission factor (Fragment)	integral component of membrane [GO:0016021]; peroxisome [GO:0005777]; synaptic vesicle [GO:0008021]	FALSE	1	47.83	2250000	42220	38421	49117	68061	52445	53962	53621	62873	56005	57860	65223	66972	43252.7	58156	57499.7	63351.7					0.427139	-7.43563	0.0274558	0.410765	-6.72405	0.0271744	0.550593	-9.53817	0.00370137	-0.0163745	-0.326317	0.871331	0.123455	-1.16321	0.543382	0.139829	-1.66872	0.450175	75.9831
sp	Homo sapiens	E9PRG8	CK098_HUMAN	C11orf98	Uncharacterized protein C11orf98	0	FALSE	1	63.79	4010000	384470	437170	398930	341860	355160	369980	433880	437830	320990	360170	239960	366620	406857	355667	397567	322250					-0.193995	-2.368	0.337616	-0.0333238	-0.695845	0.714541	-0.33634	-4.49096	0.075698	0.160671	-1.3035	0.597775	-0.142345	-1.3035	0.50364	-0.303016	-3.18938	0.205482	103.747
sp	Homo sapiens	F2Z333	FND10_HUMAN	FNDC10	Fibronectin type III domain-containing protein 10	integral component of membrane [GO:0016021]	TRUE	1	63.67	19600000	542870	614930	506120	435530	420300	429100	372130	368800	349880	360530	358830	398030	554640	428310	363603	372463					-0.372896	-9.85295	0.00836385	-0.609186	-16.0327	0.000195595	-0.574453	-14.4064	0.000226784	-0.23629	-5.52276	0.104295	-0.201557	-3.56159	0.139532	0.034733	-1.09713	0.602102	126.321
tR	Homo sapiens	F5GX29	F5GX29_HUMAN	CHP1	Calcineurin B homologous protein 1	0	FALSE	1	38.5	3680000	926500	813290	907060	749720	715370	805630	576850	546340	575580	773400	806040	682150	882283	756907	566257	753863					-0.221127	-5.94983	0.0584412	-0.639786	-17.0061	0.000119106	-0.226939	-4.93074	0.0582514	-0.418659	-10.6679	0.0171341	-0.00581241	-0.492355	0.786334	0.412847	-11.6222	0.00291403	125.232
tR	Homo sapiens	F5H0F9	F5H0F9_HUMAN	ANAPC5	Anaphase-promoting complex subunit 5	anaphase-promoting complex [GO:0005680]	FALSE	1	35.34	635000	213060	220320	167240	175510	200100	198270	250370	161510	212630	121630	171050	149470	200207	191293	208170	147383					-0.0657034	-0.69431	0.744258	0.0562722	-0.122328	0.943121	-0.441917	-5.91418	0.0322695	0.121976	-0.864415	0.707922	-0.376213	-4.54663	0.0794789	-0.498189	-6.19646	0.0421566	114.08
tR	Homo sapiens	F8W1P7	F8W1P7_HUMAN	SLC11A2	Natural resistance-associated macrophage protein 2	integral component of membrane [GO:0016021]; mitochondrion [GO:0005739]	FALSE	1	31.75	48900000	1560800	1811500	2096800	1468500	1212200	1576600	1405400	1053100	1228700	1262000	1914400	1171300	1.82303e+06	1419100	1.22907e+06	1.44923e+06					-0.361365	-3.87751	0.164132	-0.568778	-7.3139	0.0198515	-0.331051	-3.41531	0.142826	-0.207413	-2.17006	0.416961	0.0303136	-0.222157	0.890474	0.237727	-2.58384	0.281892	105.452
tR	Homo sapiens	G8JL96	G8JL96_HUMAN	PTPRS	Receptor-type tyrosine-protein phosphatase S	integral component of membrane [GO:0016021]	TRUE	1	47.93	18600000	464720	643650	582860	352000	295570	291470	256610	199450	235780	380360	480290	394300	563743	313013	230613	418317					-0.848814	-13.2319	0.00158685	-1.28956	-19.6605	2.9419e-05	-0.430443	-6.28782	0.0257749	-0.440748	-6.92205	0.0614822	0.418371	-5.70522	0.0412139	0.85912	-13.7741	0.00117399	121.839
tR	Homo sapiens	H0Y2S9	H0Y2S9_HUMAN	MPRIP	Myosin phosphatase Rho-interacting protein (Fragment)	actin cytoskeleton [GO:0015629]; cytosol [GO:0005829]	FALSE	1	36.69	0	172860	189120	136230	130500	114970	168030	154890	164660	157530	139680	160360	126530	166070	137833	159027	142190					-0.268867	-3.32172	0.215633	-0.0625228	-0.66194	0.727558	-0.223971	-2.80398	0.205135	0.206344	-2.1731	0.416449	0.0448952	-0.26243	0.870671	-0.161449	-1.71759	0.439882	114.265
tR	Homo sapiens	H0Y380	H0Y380_HUMAN	PTPRF	Receptor-type tyrosine-protein phosphatase F (Fragment)	integral component of membrane [GO:0016021]	TRUE	1	36.73	1650000	309810	345150	356260	250030	256710	195890	117690	115740	135500	152920	148600	138060	337073	234210	122977	146527					-0.52526	-10.6311	0.00584004	-1.45468	-26.5074	9.61921e-07	-1.2019	-22.7281	2.71445e-06	-0.929418	-19.7536	0.00080597	-0.676639	-14.2998	0.000416137	0.252779	-5.80423	0.0524204	147.391
tR	Homo sapiens	H0Y572	H0Y572_HUMAN	DOCK9	Dedicator of cytokinesis protein 9 (Fragment)	0	FALSE	1	48.48	6290000	288060	351820	268100	397570	295020	274390	298880	621020	419700	498980	338730	493000	302660	322327	446533	443570					0.0908255	-0.746034	0.728764	0.56107	-4.60996	0.0870324	0.551464	-4.99344	0.0560378	0.470244	-3.22351	0.264027	0.460638	-3.58236	0.137973	-0.00960608	-0.172683	0.928762	76.0509
tR	Homo sapiens	H0Y6P5	H0Y6P5_HUMAN	PTPRK	Receptor-type tyrosine-protein phosphatase kappa (Fragment)	cell junction [GO:0030054]; integral component of membrane [GO:0016021]; plasma membrane [GO:0005886]	TRUE	1	50.4	8510000	113170	84111	114970	114940	99500	102280	78339	73384	68746	58301	66572	59512	104084	105573	73489.7	61461.7					0.0205018	-0.129143	0.951317	-0.50213	-8.52022	0.0102011	-0.759985	-14.6099	0.000202073	-0.522632	-8.81322	0.0313284	-0.780487	-14.8529	0.000320544	-0.257855	-5.10874	0.0762527	131.361
tR	Homo sapiens	H0Y704	H0Y704_HUMAN	ZNF185	Zinc finger protein 185 (Fragment)	actin cytoskeleton [GO:0015629]	FALSE	1	62.8	1910000	33509	38509	31951	34870	36201	38743	46116	34227	36385	33865	41737	36585	34656.3	36604.7	38909.3	37395.7					0.0789086	-0.638234	0.764969	0.166997	-2.92641	0.219646	0.109752	-1.11666	0.544618	0.0880887	-1.85591	0.474176	0.0308435	-0.35746	0.830535	-0.0572452	-1.28918	0.547058	90.8312
tR	Homo sapiens	H0YD74	H0YD74_HUMAN	TMEM126B	Complex I assembly factor TMEM126B mitochondrial (Fragment)	integral component of membrane [GO:0016021]	TRUE	1	35.18	3380000	58555	53722	56632	68832	60513	57427	60020	51937	57304	45266	57980	51170	56303	62257.3	56420.3	51472					0.145032	-2.83626	0.269862	0.00300339	-0.352418	0.845652	-0.129424	-2.28802	0.277863	-0.142029	-2.19305	0.413759	-0.274456	-6.31171	0.0291301	-0.132427	-2.93818	0.233424	103.43
tR	Homo sapiens	H0YDF6	H0YDF6_HUMAN	NHSL1	NHS-like protein 1 (Fragment)	0	FALSE	1	28.94	1310000	83655	93552	80917	110000	97600	100170	99361	82041	101450	88674	116120	91183	86041.3	102590	94284	98659					0.253788	-3.76502	0.172952	0.131983	-1.21767	0.546592	0.197421	-2.39303	0.26112	-0.121805	-1.85597	0.474176	-0.0563675	-0.787902	0.664949	0.0654377	-0.787902	0.699386	87.6946
tR	Homo sapiens	H0YDG6	H0YDG6_HUMAN	LMO7	LIM domain only protein 7 (Fragment)	0	FALSE	2	44.85	20400000	420140	399580	482250	419730	450890	431670	416260	584200	529120	774700	626090	746200	433990	434097	509860	715663					0.000354544	-0.0241221	0.991726	0.232439	-3.39122	0.169148	0.721619	-13.518	0.000375411	0.232085	-3.44384	0.239876	0.721265	-13.5672	0.000583089	0.48918	-9.00881	0.0102446	80.2709
tR	Homo sapiens	H0YLT0	H0YLT0_HUMAN	APH1B	Gamma-secretase subunit APH-1B (Fragment)	integral component of membrane [GO:0016021]	TRUE	1	32.1	5700000	135920	127430	119000	90357	99585	111340	79972	82581	89752	91253	126690	114080	127450	100427	84101.7	110674					-0.343779	-5.94642	0.0585465	-0.599725	-11.4968	0.00207366	-0.203611	-3.20662	0.161487	-0.255946	-4.13646	0.17951	0.140169	-1.67218	0.407278	0.396114	-6.94877	0.028472	128.635
tR	Homo sapiens	H0YME6	H0YME6_HUMAN	KIF23	Kinesin-like protein KIF23	0	FALSE	1	34.74	0	115450	152210	67556	55197	68095	120920	73857	63319	62749	64322	94408	86972	111739	81404	66641.7	81900.7					-0.456957	-2.31072	0.347046	-0.745632	-4.20225	0.108367	-0.448181	-2.06652	0.316078	-0.288675	-1.14575	0.637099	0.00877551	-0.130627	0.942995	0.297451	-1.35226	0.530512	135.154
tR	Homo sapiens	H3BLW5	H3BLW5_HUMAN	L1CAM	Neural cell adhesion molecule L1 (Fragment)	integral component of membrane [GO:0016021]	TRUE	1	63.84	9900000	55149	113350	50831	36979	32673	40820	31695	21598	37334	23981	24039	25600	73110	36824	30209	24540					-0.989422	-7.62779	0.0250921	-1.27509	-10.6318	0.00330025	-1.57493	-13.412	0.000398032	-0.285668	-1.8527	0.474296	-0.585511	-4.59279	0.0776057	-0.299843	-1.8527	0.412639	133.952
tR	Homo sapiens	H3BRK3	H3BRK3_HUMAN	NQO1	NAD(P)H dehydrogenase [quinone] 1	0	FALSE	1	32.59	11700000	1008000	1134800	1064500	1028400	959400	1105200	920970	848130	920380	850490	751480	767480	1069100	1031000	896493	789817					-0.0523525	-0.0589044	0.979064	-0.254032	-5.48343	0.0539619	-0.436807	-11.2999	0.001332	-0.20168	-5.34588	0.111488	-0.384455	-11.1714	0.00198292	-0.182775	-4.37711	0.110956	106.486
tR	Homo sapiens	H3BS72	H3BS72_HUMAN	HACD3	Very-long-chain (3R)-3-hydroxyacyl-CoA dehydratase	endoplasmic reticulum [GO:0005783]; endoplasmic reticulum membrane [GO:0005789]; integral component of membrane [GO:0016021]; nuclear membrane [GO:0031965]	FALSE	1	36.8	3330000	138360	119950	143940	109650	122840	111560	127920	101940	105570	60041	66672	83768	134083	114683	111810	70160.3					-0.225474	-2.91422	0.260092	-0.262081	-3.49907	0.160292	-0.934402	-15.5659	0.000117295	-0.0366065	-0.295792	0.88188	-0.708928	-11.8654	0.00140039	-0.672322	-11.2705	0.00338842	128.487
sp	Homo sapiens	H3BS89	T178B_HUMAN	TMEM178B	Transmembrane protein 178B	integral component of membrane [GO:0016021]; membrane [GO:0016020]	TRUE	1	58.02	5450000	172210	140270	138710	172820	181140	170580	141960	96695	181280	158920	211580	138760	150397	174847	139978	169753					0.217318	-1.92799	0.419687	-0.103569	-0.947863	0.626693	0.174667	-1.26064	0.502837	-0.320887	-3.47099	0.237283	-0.0426504	-0.426938	0.806311	0.278236	-2.66456	0.270113	108.483
tR	Homo sapiens	H3BTN5	H3BTN5_HUMAN	PKM	Pyruvate kinase (Fragment)	cytosol [GO:0005829]	FALSE	1	34.08	0	118030	160470	134100	125530	114020	100580	186110	182180	163150	382970	353160	356360	137533	113377	177147	364163					-0.278658	-4.25817	0.136547	0.365163	-7.28836	0.0200775	1.4048	-23.9257	1.56568e-06	0.643821	-12.8153	0.00808738	1.68346	-26.7905	2.24726e-06	1.03964	-18.5562	0.000186346	59.5946
tR	Homo sapiens	H7BXI1	H7BXI1_HUMAN	ESYT2	Extended synaptotagmin-2	endoplasmic reticulum membrane [GO:0005789]; integral component of membrane [GO:0016021]; plasma membrane [GO:0005886]	TRUE	1	45.94	1070000	21362	22491	27779	15762	25184	40617	34352	36596	35300	42766	29697	32481	23877.3	27187.7	35416	34981.3					0.187311	-0.21765	0.915659	0.56876	-4.38682	0.0982371	0.550944	-4.06	0.0980925	0.381449	-3.92116	0.196408	0.363633	-3.60177	0.136613	-0.017816	-0.149215	0.942609	70.3494
sp	Homo sapiens	H7BZ55	CRCC2_HUMAN	CROCC2	Putative ciliary rootlet coiled-coil protein 2	0	FALSE	1	31.04	1360000	69409	46142	61333	50419	47707	52582	62322	43639	50651	48466	51834	60125	58961.3	50236	52204	53475					-0.231048	-2.57524	0.305912	-0.175609	-2.10165	0.344157	-0.140905	-0.872498	0.621956	0.0554388	-0.258128	0.894484	0.090143	-1.27137	0.511807	0.0347042	-0.894632	0.664822	129.207
tR	Homo sapiens	H7C2D8	H7C2D8_HUMAN	MLPH	Melanophilin (Fragment)	0	FALSE	1	54.5	4110000	19609	25218	19111	25112	18826	20493	26814	25055	26299	27553	21680	26790	21312.7	21477	26056	25341					0.0110814	-0.0639846	0.976408	0.289905	-4.39173	0.0980285	0.249762	-3.12535	0.169621	0.278823	-4.53711	0.153364	0.238681	-3.26084	0.1669	-0.0401422	-0.67746	0.74272	83.2772
tR	Homo sapiens	H7C3C4	H7C3C4_HUMAN	SLC4A7	Anion exchange protein (Fragment)	integral component of membrane [GO:0016021]	TRUE	2	89.56	572000000	6932900	6446200	7155500	7486800	7496900	7331700	6248800	5445500	6934700	4846000	6161000	4943100	6.84487e+06	7.43847e+06	6.20967e+06	5316700	0.0111253	0.0184047	1.39908		0.119983	-1.20266	0.591474	-0.140507	-2.01027	0.361897	-0.364491	-7.16947	0.0150734	-0.260489	-3.9295	0.195713	-0.484474	-9.33672	0.00544269	-0.223985	-3.9295	0.139761	107.446
tR	Homo sapiens	I3L202	I3L202_HUMAN	ZDHHC1	Palmitoyltransferase	integral component of membrane [GO:0016021]	TRUE	1	45.34	6590000	549700	442570	482110	862090	842610	919580	833920	805810	972440	665770	744830	596300	491460	874760	870723	668967					0.831813	-16.7259	0.000271362	0.82514	-16.7259	0.000138217	0.44486	-8.33636	0.00751726	-0.00667287	-3.60385e-14	1	-0.386953	-7.98431	0.0114573	-0.38028	-7.98431	0.016971	75.6665
tR	Homo sapiens	I3L213	I3L213_HUMAN	PHKB	Phosphorylase b kinase regulatory subunit (Fragment)	plasma membrane [GO:0005886]	TRUE	1	64.31	5080000	615340	558150	556660	508500	589860	507990	705320	879510	625790	453870	278720	478630	576717	535450	736873	403740					-0.107111	-0.462896	0.824235	0.353554	-3.64058	0.147591	-0.514436	-6.54509	0.0220711	0.460665	-4.56615	0.15153	-0.407325	-5.5723	0.0443729	-0.86799	-11.5622	0.00300335	109.259
tR	Homo sapiens	J3KPA5	J3KPA5_HUMAN	SLC6A9	Transporter	integral component of plasma membrane [GO:0005887]	TRUE	1	52.41	20000000	857160	803970	855080	988400	927160	943270	629840	577770	776830	617640	816940	598200	838737	952943	661480	677593					0.184172	-2.03094	0.399133	-0.34252	-5.37779	0.0572003	-0.307798	-5.37779	0.0443903	-0.526693	-8.67956	0.0329225	-0.491971	-8.67956	0.00783733	0.0347221	0	1	109.515
tR	Homo sapiens	K7ESF5	K7ESF5_HUMAN	SLC44A2	Choline transporter-like protein 2 (Fragment)	integral component of membrane [GO:0016021]	TRUE	1	28.69	3290000	39266	29867	31849	42586	45463	41231	29953	34791	37317	28915	29893	25179	33660.7	43093.3	34020.3	27995.7					0.356401	-5.87873	0.0607713	0.0153335	-0.105042	0.951175	-0.26586	-4.68337	0.0675193	-0.341067	-5.63579	0.0997362	-0.622261	-11.9523	0.00134838	-0.281194	-4.92155	0.0840067	113.183
tR	Homo sapiens	M0QZM1	M0QZM1_HUMAN	HNRNPM	Heterogeneous nuclear ribonucleoprotein M (Fragment)	nucleoplasm [GO:0005654]	FALSE	1	63.1	18400000	277680	296760	231640	237690	236230	238790	262600	243240	243080	276100	333810	262760	268693	237570	249640	290890					-0.177608	-2.5925	0.303612	-0.106111	-1.29568	0.526379	0.114513	-1.54616	0.427243	0.0714965	-0.863298	0.708186	0.292121	-5.08317	0.0584879	0.220625	-3.48849	0.176319	106.107
tR	Homo sapiens	M0R0P9	M0R0P9_HUMAN	AKT2	Non-specific serine/threonine protein kinase	cytosol [GO:0005829]; intracellular membrane-bounded organelle [GO:0043231]; nucleoplasm [GO:0005654]	FALSE	1	31.83	3510000	2328500	2217400	1842900	1954400	1623200	2026000	2012100	1755700	1923700	2149300	2368000	1431900	2129600	1.86787e+06	1.89717e+06	1.98307e+06					-0.189191	-1.68524	0.471405	-0.166736	-1.68524	0.429703	-0.102849	-1.32723	0.484433	0.022455	0	1	0.0863417	-0.220072	0.891537	0.0638868	-0.220072	0.903916	118.232
sp	Homo sapiens	M5A8F1	SUPYN_HUMAN	ERVH48-1	Suppressyn	extracellular space [GO:0005615]	TRUE	4	137.08	523000000	1238100	819680	804180	6878300	6918800	6458600	5968100	5235800	6010800	4671500	5680800	4172800	953987	6751900	5.73823e+06	4841700	7.63501e-07	2.57971e-05	7.07756	3	2.82325	-32.6214	1.07829e-07	2.58857	-31.1484	1.17125e-07	2.34347	-29.5483	1.2472e-07	-0.234687	-2.79743	0.316407	-0.47978	-6.86973	0.0213599	-0.245093	-2.79743	0.25214	27.0833
sp	Homo sapiens	O00116	ADAS_HUMAN	AGPS	Alkyldihydroxyacetonephosphate synthase peroxisomal	cytosol [GO:0005829]; membrane [GO:0016020]; mitochondrion [GO:0005739]; nucleolus [GO:0005730]; peroxisomal matrix [GO:0005782]; peroxisomal membrane [GO:0005778]; peroxisome [GO:0005777]	FALSE	12	217.7	82200000	2648200	2837600	2761100	2714900	2843600	2935100	3210700	3165300	2812100	3142300	3552000	3298500	2.74897e+06	2831200	3062700	3.33093e+06					0.0425243	-0.880649	0.686343	0.155915	-3.30479	0.177652	0.277037	-8.38161	0.00734078	0.11339	-1.86957	0.471434	0.234513	-6.68982	0.0235977	0.121122	-3.64945	0.161689	88.4665
sp	Homo sapiens	O00124	UBXN8_HUMAN	UBXN8	UBX domain-containing protein 8	endoplasmic reticulum [GO:0005783]; integral component of endoplasmic reticulum membrane [GO:0030176]; nucleolus [GO:0005730]; nucleoplasm [GO:0005654]	FALSE	4	111.58	22700000	848050	679930	868970	678660	615060	671820	672590	506210	497650	327610	400840	379860	798983	655180	558817	369437					-0.286274	-3.34073	0.213528	-0.51579	-8.24284	0.0118689	-1.11284	-17.8749	3.28922e-05	-0.229516	-3.48342	0.235765	-0.826564	-14.1343	0.000445905	-0.597048	-9.61942	0.00745831	142.385
sp	Homo sapiens	O00139	KIF2A_HUMAN	KIF2A	Kinesin-like protein KIF2A	centriolar subdistal appendage [GO:0120103]; centriole [GO:0005814]; centrosome [GO:0005813]; cytoplasm [GO:0005737]; cytosol [GO:0005829]; kinesin complex [GO:0005871]; membrane [GO:0016020]; microtubule [GO:0005874]; nuclear body [GO:0016604]; nucleolus [GO:0005730]; nucleoplasm [GO:0005654]; sperm principal piece [GO:0097228]; spindle [GO:0005819]; spindle pole [GO:0000922]	FALSE	5	124.39	31100000	1261000	1381500	1184700	1028700	1230700	1208600	1201900	1196900	1166800	1315200	1418800	1174800	1.27573e+06	1156000	1.18853e+06	1.30293e+06					-0.142185	-3.57949	0.189729	-0.102144	-1.82765	0.398855	0.0304365	-0.0093927	0.99511	0.040041	-1.10822	0.645746	0.172622	-3.60032	0.136715	0.132581	-1.84499	0.414017	102.454
sp	Homo sapiens	O00142	KITM_HUMAN	TK2	Thymidine kinase 2 mitochondrial	cytoplasm [GO:0005737]; mitochondrial matrix [GO:0005759]	FALSE	1	33.43	1060000	241370	209460	237810	245450	229180	251760	275390	228580	299290	283040	248610	287890	229547	242130	267753	273180					0.0769944	-0.477429	0.820645	0.222117	-3.5295	0.157232	0.251064	-3.5295	0.134222	0.145123	-2.63779	0.339679	0.17407	-2.63779	0.238538	0.0289473	0	1	95.3457
sp	Homo sapiens	O00148	DX39A_HUMAN	DDX39A	ATP-dependent RNA helicase DDX39A	cytoplasm [GO:0005737]; membrane [GO:0016020]; nuclear speck [GO:0016607]; nucleoplasm [GO:0005654]; nucleus [GO:0005634]	FALSE	7	169.06	221000000	4923400	4853600	5025600	3652400	4077400	4450800	4248200	4270000	4538700	4467700	4728700	4939200	4934200	4060200	4352300	4.71187e+06					-0.281265	-6.71968	0.0391236	-0.181038	-4.68334	0.0836316	-0.0665175	-1.18209	0.525213	0.100227	-1.10915	0.645711	0.214748	-4.57749	0.0782117	0.114521	-2.68552	0.267002	109.054
sp	Homo sapiens	O00151	PDLI1_HUMAN	PDLIM1	PDZ and LIM domain protein 1	adherens junction [GO:0005912]; cytoplasm [GO:0005737]; cytoskeleton [GO:0005856]; filamentous actin [GO:0031941]; focal adhesion [GO:0005925]; stress fiber [GO:0001725]; transcription regulator complex [GO:0005667]; Z disc [GO:0030018]	FALSE	13	188.02	341000000	5919500	6226400	5675100	5376100	6121900	6118900	7361900	6803400	6947400	8860700	9215200	9070600	5.94033e+06	5872300	7.03757e+06	9.04883e+06					-0.0166182	-0.390577	0.852576	0.244533	-7.13596	0.0217399	0.607188	-18.4361	2.42018e-05	0.261151	-7.9712	0.0423581	0.623806	-19.0093	5.12727e-05	0.362655	-11.4206	0.00318262	84.8703
sp	Homo sapiens	O00154	BACH_HUMAN	ACOT7	Cytosolic acyl coenzyme A thioester hydrolase	cytosol [GO:0005829]; extracellular exosome [GO:0070062]; mitochondrion [GO:0005739]; nucleoplasm [GO:0005654]	TRUE	11	219.54	113000000	3594000	3742700	3244800	3213300	3237000	3772200	3831400	3728700	3815500	4919100	4598200	4524700	3.52717e+06	3407500	3.79187e+06	4.68067e+06	0.00105927	0.00281547	1.37364		-0.0497961	-1.32366	0.560006	0.104398	-2.31137	0.307065	0.408204	-10.0486	0.00274565	0.154195	-4.45281	0.159475	0.458	-12.242	0.00116622	0.303806	-6.43836	0.0371911	93.307
sp	Homo sapiens	O00159	MYO1C_HUMAN	MYO1C	Unconventional myosin-Ic	actin cytoskeleton [GO:0015629]; basal plasma membrane [GO:0009925]; brush border [GO:0005903]; cytoplasm [GO:0005737]; cytoplasmic vesicle membrane [GO:0030659]; cytosol [GO:0005829]; extracellular exosome [GO:0070062]; filamentous actin [GO:0031941]; lateral plasma membrane [GO:0016328]; membrane [GO:0016020]; membrane raft [GO:0045121]; microvillus [GO:0005902]; nuclear body [GO:0016604]; nucl…	TRUE	49	401.89	5220000000	65482000	66844000	66922000	66784000	66702000	74806000	80939000	78920000	84372000	64424000	70021000	66191000	66416000	6.94307e+07	8.14103e+07	6.68787e+07	0.00129111	0.00329803	1.22576		0.0640422	-1.21529	0.588192	0.293681	-7.05912	0.0226784	0.0100152	-0.0257137	0.986334	0.229639	-4.85986	0.13547	-0.0540269	-1.17377	0.539999	-0.283666	-6.99775	0.0276722	92.1841
sp	Homo sapiens	O00160	MYO1F_HUMAN	MYO1F	Unconventional myosin-If	actin-based cell projection [GO:0098858]; actin cytoskeleton [GO:0015629]; cytoplasm [GO:0005737]; microvillus [GO:0005902]; plasma membrane [GO:0005886]; unconventional myosin complex [GO:0016461]; vesicle [GO:0031982]	TRUE	2	196.62	297000000	3854000	3961400	3690900	2391100	2674000	2578800	2678700	2706400	2249400	2146700	2254700	2170900	3.83543e+06	2.54797e+06	2.54483e+06	2.19077e+06	2.66891e-05	0.00018775	1.75073	1	-0.590043	-14.0045	0.00107331	-0.591818	-14.0045	0.000575208	-0.807954	-19.5841	1.37345e-05	-0.00177523	-4.18047e-14	1	-0.217911	-5.89865	0.0370107	-0.216135	-5.89865	0.0497588	138.646
sp	Homo sapiens	O00161	SNP23_HUMAN	SNAP23	Synaptosomal-associated protein 23	adherens junction [GO:0005912]; azurophil granule [GO:0042582]; cytoplasm [GO:0005737]; extracellular exosome [GO:0070062]; focal adhesion [GO:0005925]; mitochondrion [GO:0005739]; neuron projection [GO:0043005]; nucleoplasm [GO:0005654]; phagocytic vesicle membrane [GO:0030670]; plasma membrane [GO:0005886]; presynapse [GO:0098793]; SNARE complex [GO:0031201]; specific granule [GO:0042581]; spec…	TRUE	6	171.97	124000000	2807100	2637400	2836200	2918300	2920500	3104300	3631900	3710800	3851500	5719900	5140700	5892000	2.76023e+06	2.98103e+06	3731400	5584200	3.39727e-07	1.6119e-05	2.02309	5	0.111022	-3.85454	0.165892	0.434927	-13.7164	0.000665345	1.01656	-26.1097	5.98333e-07	0.323905	-8.74661	0.0321956	0.905538	-23.3674	9.87553e-06	0.581634	-16.7533	0.000363054	74.5733
sp	Homo sapiens	O00170	AIP_HUMAN	AIP	AH receptor-interacting protein	aryl hydrocarbon receptor complex [GO:0034751]; cytoplasm [GO:0005737]; cytosol [GO:0005829]; membrane [GO:0016020]; nucleoplasm [GO:0005654]	FALSE	8	188.16	130000000	5409200	5620400	5622300	4835100	5169500	5582300	5804500	5092800	5026700	5811300	5704800	5225700	5.55063e+06	5.19563e+06	5308000	5580600					-0.0953528	-2.01646	0.402341	-0.064484	-0.614959	0.743907	0.00776785	-0.0976924	0.95114	0.0308688	-1.10463	0.646512	0.103121	-1.83872	0.371413	0.0722519	-0.488836	0.815187	100.009
sp	Homo sapiens	O00178	GTPB1_HUMAN	GTPBP1	GTP-binding protein 1	cytoplasmic exosome (RNase complex) [GO:0000177]; cytosol [GO:0005829]; membrane [GO:0016020]	FALSE	1	56.4	7070000	139610	124790	142080	116940	143320	132160	166570	163870	160350	198850	171400	159240	135493	130807	163597	176497					-0.0507858	-1.10313	0.621145	0.271921	-5.27924	0.0603488	0.381419	-8.82996	0.00559794	0.322707	-7.31876	0.0530554	0.432205	-10.7923	0.00242024	0.109498	-2.23442	0.337026	92.092
sp	Homo sapiens	O00180	KCNK1_HUMAN	KCNK1	Potassium channel subfamily K member 1	apical plasma membrane [GO:0016324]; brush border membrane [GO:0031526]; dendrite [GO:0030425]; integral component of membrane [GO:0016021]; integral component of plasma membrane [GO:0005887]; intracellular membrane-bounded organelle [GO:0043231]; inward rectifier potassium channel complex [GO:1902937]; perikaryon [GO:0043204]; plasma membrane [GO:0005886]; potassium channel complex [GO:0034705];…	TRUE	2	88.38	4410000	57007	46499	54198	55703	70378	68357	65230	56242	71483	54398	57648	54306	52568	64812.7	64318.3	55450.7	0.094637	0.116533	1.23293		0.302091	-6.37314	0.0470527	0.291045	-5.57387	0.0515753	0.07702	-0.798581	0.647751	-0.0110458	-0.372055	0.862169	-0.225071	-4.82297	0.0680487	-0.214025	-4.05097	0.131132	96.1536
sp	Homo sapiens	O00182	LEG9_HUMAN	LGALS9	Galectin-9	collagen-containing extracellular matrix [GO:0062023]; cytoplasm [GO:0005737]; cytosol [GO:0005829]; extracellular space [GO:0005615]; nucleus [GO:0005634]	TRUE	3	81.44	22600000	178830	286050	207330	205830	188760	221700	230230	259170	272500	681940	604650	626540	224070	205430	253967	637710	2.51524e-05	0.00017971	3.10427	5	-0.125303	-0.644074	0.763218	0.18069	-2.4965	0.278082	1.50895	-21.6635	4.61794e-06	0.305992	-3.6527	0.2208	1.63425	-22.422	1.29202e-05	1.32826	-19.2161	0.000131605	54.1426
sp	Homo sapiens	O00186	STXB3_HUMAN	STXBP3	Syntaxin-binding protein 3	apical plasma membrane [GO:0016324]; basolateral plasma membrane [GO:0016323]; cytosol [GO:0005829]; extracellular exosome [GO:0070062]; phagocytic vesicle [GO:0045335]; plasma membrane [GO:0005886]; platelet alpha granule [GO:0031091]; presynapse [GO:0098793]; secretory granule [GO:0030141]; specific granule [GO:0042581]; tertiary granule [GO:0070820]	TRUE	12	191.12	104000000	3067700	3118000	3065700	3343100	3350300	3693500	3588200	3484000	3891000	5002700	5452100	4475300	3083800	3462300	3654400	4976700	0.000103705	0.000498412	1.61382	5	0.167022	-4.63312	0.112787	0.244925	-6.59518	0.0291646	0.69048	-18.545	2.30913e-05	0.0779038	-1.06129	0.65866	0.523459	-13.7859	0.000522409	0.445555	-12.0555	0.00241789	80.8502
sp	Homo sapiens	O00189	AP4M1_HUMAN	AP4M1	AP-4 complex subunit mu-1	AP-4 adaptor complex [GO:0030124]; clathrin adaptor complex [GO:0030131]; cytoplasmic vesicle [GO:0031410]; cytosol [GO:0005829]; early endosome [GO:0005769]; endosome lumen [GO:0031904]; extracellular exosome [GO:0070062]; intracellular membrane-bounded organelle [GO:0043231]; trans-Golgi network [GO:0005802]; trans-Golgi network membrane [GO:0032588]	TRUE	5	123.26	52700000	1278800	1667000	1423100	1400600	1580800	1331400	1785000	2440100	1704800	2182800	1572300	2187800	1456300	1437600	1.97663e+06	1.98097e+06	0.0605344	0.0783469	1.37797		-0.0186453	-0.165611	0.935311	0.440738	-5.70603	0.0477199	0.443897	-6.25356	0.0263034	0.459383	-6.08257	0.0839527	0.462542	-6.63155	0.0244331	0.00315933	-0.246347	0.889941	74.6581
sp	Homo sapiens	O00193	SMAP_HUMAN	SMAP	Small acidic protein	0	FALSE	4	106.35	13100000	1103200	1626000	1034500	830350	1055800	863500	1093200	1016700	1077600	2087300	2671000	2492000	1.25457e+06	916550	1062500	2.41677e+06					-0.452904	-6.386	0.0468024	-0.239726	-2.42007	0.290019	0.945889	-14.4048	0.000226871	0.213177	-2.76224	0.321461	1.39879	-20.211	3.05013e-05	1.18562	-17.3506	0.000306919	78.0974
sp	Homo sapiens	O00194	RB27B_HUMAN	RAB27B	Ras-related protein Rab-27B	anchored component of synaptic vesicle membrane [GO:0098993]; apical plasma membrane [GO:0016324]; axon cytoplasm [GO:1904115]; extracellular exosome [GO:0070062]; Golgi stack [GO:0005795]; late endosome [GO:0005770]; melanosome [GO:0042470]; multivesicular body membrane [GO:0032585]; plasma membrane [GO:0005886]; platelet dense granule membrane [GO:0031088]; secretory granule [GO:0030141]; trans…	TRUE	5	155.29	95300000	5117100	5298900	5320500	5613800	5472300	6030600	6523500	6238200	5729600	7526800	8342100	7582800	5245500	5.70557e+06	6.16377e+06	7.81723e+06	7.32855e-05	0.000393257	1.49027		0.12129	-2.78153	0.27713	0.232732	-7.26654	0.020273	0.575578	-17.4366	4.21278e-05	0.111442	-3.164	0.270793	0.454288	-14.1504	0.000443008	0.342846	-9.97609	0.00631582	82.0967
sp	Homo sapiens	O00203	AP3B1_HUMAN	AP3B1	AP-3 complex subunit beta-1	AP-3 adaptor complex [GO:0030123]; axon cytoplasm [GO:1904115]; clathrin adaptor complex [GO:0030131]; clathrin-coated vesicle membrane [GO:0030665]; Golgi apparatus [GO:0005794]; lysosomal membrane [GO:0005765]; membrane [GO:0016020]; mitochondrion [GO:0005739]; synapse [GO:0045202]	FALSE	28	250.45	740000000	21438000	20441000	20299000	20004000	21445000	22752000	23653000	21485000	22257000	17224000	19476000	18627000	20726000	2.14003e+07	22465000	1.84423e+07					0.0461916	-0.622198	0.771492	0.116237	-2.14671	0.336276	-0.168421	-4.83547	0.0615793	0.0700458	-1.20537	0.620396	-0.214612	-6.08594	0.0333194	-0.284658	-8.27828	0.0145957	103.274
sp	Homo sapiens	O00214	LEG8_HUMAN	LGALS8	Galectin-8	cytoplasm [GO:0005737]; cytoplasmic vesicle [GO:0031410]; cytosol [GO:0005829]; extracellular space [GO:0005615]; membrane [GO:0016020]	TRUE	9	201.3	439000000	18911000	19166000	18277000	11870000	12449000	12782000	10251000	11212000	9703700	12206000	13194000	12899000	1.87847e+07	12367000	10388900	1.27663e+07	2.15778e-06	4.22712e-05	1.80815	1	-0.60306	-16.5521	0.000292268	-0.854513	-22.2396	7.48422e-06	-0.557211	-15.724	0.000107406	-0.251453	-7.01449	0.0596296	0.0458487	-0.518116	0.776247	0.297301	-8.08854	0.0160791	139.29
sp	Homo sapiens	O00217	NDUS8_HUMAN	NDUFS8	NADH dehydrogenase [ubiquinone] iron-sulfur protein 8 mitochondrial	mitochondrial matrix [GO:0005759]; mitochondrial respiratory chain complex I [GO:0005747]; mitochondrion [GO:0005739]	FALSE	4	116.71	84300000	2309500	2505100	2356000	2347400	2478600	2628100	2756600	2926400	2632600	2423200	2105000	2822000	2390200	2484700	2.77187e+06	2.45007e+06					0.0559403	-0.620018	0.77203	0.213727	-4.0854	0.115615	0.0356897	-0.167666	0.916962	0.157786	-2.92968	0.299691	-0.0202507	-0.411373	0.812095	-0.178037	-3.72571	0.155791	91.494
sp	Homo sapiens	O00220	TR10A_HUMAN	TNFRSF10A	Tumor necrosis factor receptor superfamily member 10A	cell surface [GO:0009986]; cytosol [GO:0005829]; Golgi apparatus [GO:0005794]; integral component of membrane [GO:0016021]; membrane raft [GO:0045121]; plasma membrane [GO:0005886]	TRUE	5	144.71	304000000	11930000	10217000	10636000	7948900	8707900	8836800	8007300	6446300	6799000	7664800	8254900	6120800	1.09277e+07	8.49787e+06	7084200	7.34683e+06	0.00425797	0.0083146	1.54254	1	-0.362813	-5.18365	0.0865497	-0.625309	-11.2469	0.00235145	-0.572791	-9.95046	0.00290735	-0.262496	-4.61466	0.149385	-0.209978	-3.31724	0.161265	0.0525176	-0.68782	0.738089	140.948
sp	Homo sapiens	O00221	IKBE_HUMAN	NFKBIE	NF-kappa-B inhibitor epsilon	cytoplasm [GO:0005737]; cytosol [GO:0005829]; fibrillar center [GO:0001650]; Golgi apparatus [GO:0005794]; nucleoplasm [GO:0005654]; perinuclear region of cytoplasm [GO:0048471]	FALSE	3	101.74	1820000	440490	582600	515020	621360	530170	500010	562580	852710	564570	1049100	641810	1130400	512703	550513	659953	940437					0.102653	-0.501992	0.813459	0.36424	-2.96605	0.214251	0.875207	-9.14567	0.00463581	0.261587	-2.08311	0.432478	0.772553	-8.11506	0.0106526	0.510967	-4.75202	0.0911002	66.1494
sp	Homo sapiens	O00231	PSD11_HUMAN	PSMD11	26S proteasome non-ATPase regulatory subunit 11	cytosol [GO:0005829]; extracellular region [GO:0005576]; ficolin-1-rich granule lumen [GO:1904813]; membrane [GO:0016020]; nucleoplasm [GO:0005654]; nucleus [GO:0005634]; proteasome accessory complex [GO:0022624]; proteasome complex [GO:0000502]; proteasome regulatory particle, lid subcomplex [GO:0008541]; secretory granule lumen [GO:0034774]	TRUE	10	190.49	103000000	14972000	16736000	16167000	15077000	16344000	17823000	25325000	25389000	20113000	40443000	29629000	30385000	1.59583e+07	1.64147e+07	23609000	3.34857e+07	0.000213592	0.000832712	2.09832	5	0.0406755	-0.673408	0.752711	0.565027	-10.3166	0.00391097	1.06923	-18.4693	2.39078e-05	0.524351	-9.01304	0.0299777	1.02856	-17.5117	9.63811e-05	0.504207	-8.35973	0.0140447	66.9381
sp	Homo sapiens	O00232	PSD12_HUMAN	PSMD12	26S proteasome non-ATPase regulatory subunit 12	cytoplasm [GO:0005737]; cytosol [GO:0005829]; extracellular exosome [GO:0070062]; extracellular region [GO:0005576]; ficolin-1-rich granule lumen [GO:1904813]; membrane [GO:0016020]; nuclear proteasome complex [GO:0031595]; nucleoplasm [GO:0005654]; proteasome accessory complex [GO:0022624]; proteasome complex [GO:0000502]; proteasome regulatory particle [GO:0005838]; proteasome regulatory partic…	TRUE	11	204.2	127000000	3240300	3908300	3760200	3627700	3829000	4337400	6247500	6005700	5303500	9098800	6418500	7113900	3.63627e+06	3.93137e+06	5.85223e+06	7.54373e+06	0.000233554	0.000884254	2.07458	4	0.112573	-1.61951	0.48699	0.686529	-12.6559	0.00115246	1.05282	-18.6027	2.24338e-05	0.573956	-10.1008	0.0203647	0.940248	-16.6005	0.000144357	0.366291	-6.00559	0.0467423	61.8272
sp	Homo sapiens	O00233	PSMD9_HUMAN	PSMD9	26S proteasome non-ATPase regulatory subunit 9	cytoplasm [GO:0005737]; cytosol [GO:0005829]; nucleoplasm [GO:0005654]; nucleus [GO:0005634]; proteasome regulatory particle [GO:0005838]	FALSE	1	29.45	553000	76720	54684	76108	71700	65603	80063	86853	59478	56900	65290	76086	76978	69170.7	72455.3	67743.7	72784.7					0.0669315	-0.724492	0.73566	-0.0300743	-0.0917222	0.957059	0.0734742	-0.724492	0.675593	-0.0970058	-0.85371	0.711193	0.00654267	-2.45062e-14	1	0.103548	-0.85371	0.678421	108.763
sp	Homo sapiens	O00238	BMR1B_HUMAN	BMPR1B	Bone morphogenetic protein receptor type-1B	dendrite [GO:0030425]; HFE-transferrin receptor complex [GO:1990712]; integral component of plasma membrane [GO:0005887]; neuronal cell body [GO:0043025]; plasma membrane [GO:0005886]; receptor complex [GO:0043235]	TRUE	6	196.27	72800000	2948500	2281700	2716300	2373700	2386600	2289200	1776800	1322600	1692800	1103100	1404600	1178200	2.64883e+06	2.34983e+06	1597400	1.22863e+06	0.00017971	0.000738556	2.15592	2	-0.172799	-2.1348	0.379027	-0.729631	-12.7754	0.00108395	-1.1083	-18.4596	2.39739e-05	-0.556833	-9.59188	0.0247292	-0.935504	-15.9329	0.000195606	-0.378671	-5.66396	0.056307	150.728
sp	Homo sapiens	O00255	MEN1_HUMAN	MEN1	Menin	chromatin [GO:0000785]; cleavage furrow [GO:0032154]; cytoplasm [GO:0005737]; cytosol [GO:0005829]; endoplasmic reticulum lumen [GO:0005788]; histone methyltransferase complex [GO:0035097]; nuclear chromatin [GO:0000790]; nuclear chromosome, telomeric region [GO:0000784]; nuclear matrix [GO:0016363]; nucleoplasm [GO:0005654]; nucleus [GO:0005634]; protein-containing complex [GO:0032991]	FALSE	4	81.06	6840000	632150	1475800	640830	648800	660590	648030	810900	704750	805220	728220	717940	762740	916260	652473	773623	736300					-0.489838	-3.0563	0.243506	-0.244126	-0.991111	0.613389	-0.315463	-1.24309	0.507979	0.245712	-1.53018	0.544042	0.174375	-1.26116	0.51445	-0.0713376	-0.166503	0.932293	82.1332
sp	Homo sapiens	O00257	CBX4_HUMAN	CBX4	E3 SUMO-protein ligase CBX4	nuclear body [GO:0016604]; nuclear speck [GO:0016607]; nucleoplasm [GO:0005654]; nucleus [GO:0005634]; PcG protein complex [GO:0031519]; PRC1 complex [GO:0035102]	FALSE	1	30.1	2670000	196540	356660	193030	135610	101230	133570	123860	124580	126710	112350	153460	137750	248743	123470	125050	134520					-1.0105	-11.8823	0.00318067	-0.992153	-11.058	0.00261211	-0.886837	-9.78358	0.0032035	0.0183445	-0.422272	0.851414	0.12366	-1.23872	0.520613	0.105316	-0.67039	0.745385	124.435
sp	Homo sapiens	O00258	WRB_HUMAN	WRB	Tail-anchored protein insertion receptor WRB	endoplasmic reticulum [GO:0005783]; endoplasmic reticulum membrane [GO:0005789]; integral component of membrane [GO:0016021]; nucleus [GO:0005634]	FALSE	4	102.53	41300000	1307300	1204600	1333100	1245300	1313500	1300000	1256400	1099500	1183500	818170	1009300	991470	1.28167e+06	1.28627e+06	1179800	939647					0.00516867	-0.000480239	0.999836	-0.119479	-0.998605	0.611257	-0.447831	-11.4339	0.00123349	-0.124647	-0.997862	0.673381	-0.453	-11.4328	0.00174262	-0.328352	-9.65855	0.00734611	111.559
sp	Homo sapiens	O00264	PGRC1_HUMAN	PGRMC1	Membrane-associated progesterone receptor component 1	cell body [GO:0044297]; endomembrane system [GO:0012505]; endoplasmic reticulum [GO:0005783]; integral component of plasma membrane [GO:0005887]; membrane [GO:0016020]; mitochondrial outer membrane [GO:0005741]; neuronal cell body [GO:0043025]; neuron projection [GO:0043005]; plasma membrane [GO:0005886]; smooth endoplasmic reticulum membrane [GO:0030868]; specific granule membrane [GO:0035579]; …	TRUE	7	178.83	59900000	1429500	1782900	1285000	1477800	1465800	1458000	1711900	1613800	1643400	1718500	2189400	1914800	1.49913e+06	1467200	1.65637e+06	1940900	0.0400563	0.0547673	1.32286		-0.0310632	-0.107536	0.96008	0.143893	-1.91655	0.380393	0.372597	-7.40856	0.0131131	0.174957	-1.72483	0.499721	0.40366	-7.15896	0.0182388	0.228704	-4.27016	0.117426	87.1168
sp	Homo sapiens	O00267	SPT5H_HUMAN	SUPT5H	Transcription elongation factor SPT5	DSIF complex [GO:0032044]; nucleoplasm [GO:0005654]; nucleus [GO:0005634]	FALSE	23	281.28	296000000	3792500	4079300	4222100	4613100	4453200	4256000	5046600	5070700	5270600	6591700	6435200	6198500	4031300	4.44077e+06	5129300	6.40847e+06					0.139564	-2.82452	0.271496	0.347517	-11.313	0.00227041	0.668734	-20.8529	6.95939e-06	0.207953	-7.18035	0.0561006	0.52917	-18.0331	7.60702e-05	0.321217	-10.8457	0.0041072	75.8127
sp	Homo sapiens	O00268	TAF4_HUMAN	TAF4	Transcription initiation factor TFIID subunit 4	cytosol [GO:0005829]; MLL1 complex [GO:0071339]; nuclear chromatin [GO:0000790]; nucleoplasm [GO:0005654]; protein-containing complex [GO:0032991]; transcription factor TFIID complex [GO:0005669]; transcription factor TFTC complex [GO:0033276]	FALSE	4	128.11	5200000	627660	575340	585820	622210	607820	599160	574170	582650	604050	568810	670210	601860	596273	609730	586957	613627					0.0321967	-0.151968	0.940952	-0.0227198	-0.683685	0.71888	0.0413874	-0.307643	0.850377	-0.0549165	-0.488267	0.838454	0.00919065	-0.488267	0.787423	0.0641072	-1.10324	0.600885	104.324
sp	Homo sapiens	O00291	HIP1_HUMAN	HIP1	Huntingtin-interacting protein 1	clathrin-coated vesicle [GO:0030136]; clathrin-coated vesicle membrane [GO:0030665]; cytoplasm [GO:0005737]; cytoskeleton [GO:0005856]; cytosol [GO:0005829]; extrinsic component of cytoplasmic side of plasma membrane [GO:0031234]; extrinsic component of postsynaptic membrane [GO:0098890]; extrinsic component of presynaptic membrane [GO:0098888]; glutamatergic synapse [GO:0098978]; Golgi apparatus…	TRUE	27	285.76	243000000	10443000	10599000	10818000	12038000	11632000	12151000	12978000	11292000	13049000	10812000	13003000	11560000	10620000	1.19403e+07	1.24397e+07	1.17917e+07	0.0804706	0.100645	1.17134		0.169059	-3.48346	0.199888	0.228164	-4.50453	0.092331	0.150984	-3.48346	0.137619	0.0591047	-0.520545	0.829832	-0.0180755	0	1	-0.0771802	-0.520545	0.805816	89.2723
sp	Homo sapiens	O00299	CLIC1_HUMAN	CLIC1	Chloride intracellular channel protein 1	blood microparticle [GO:0072562]; brush border [GO:0005903]; chloride channel complex [GO:0034707]; cytoplasm [GO:0005737]; extracellular exosome [GO:0070062]; extracellular space [GO:0005615]; membrane [GO:0016020]; mitochondrion [GO:0005739]; nuclear envelope [GO:0005635]; nuclear membrane [GO:0031965]; nucleus [GO:0005634]; perinuclear region of cytoplasm [GO:0048471]; plasma membrane [GO:0005…	TRUE	11	274.68	521000000	7446900	7631900	7477900	7468000	7819900	8129300	9164500	8852800	9040600	14910000	12724000	12072000	7518900	7.80573e+06	9019300	1.32353e+07	1.10417e-05	0.000111416	1.76028	5	0.0540126	-1.34515	0.553841	0.262494	-6.88686	0.0249449	0.815801	-20.3098	9.16957e-06	0.208481	-4.50982	0.155189	0.761788	-18.7289	5.76494e-05	0.553307	-14.118	0.00101582	79.266
sp	Homo sapiens	O00303	EIF3F_HUMAN	EIF3F	Eukaryotic translation initiation factor 3 subunit F	cytosol [GO:0005829]; eukaryotic 43S preinitiation complex [GO:0016282]; eukaryotic 48S preinitiation complex [GO:0033290]; eukaryotic translation initiation factor 3 complex [GO:0005852]; eukaryotic translation initiation factor 3 complex, eIF3m [GO:0071541]; membrane [GO:0016020]	FALSE	8	196.9	420000000	8075400	8219700	7351500	8803600	9084600	10035000	9762400	9302500	10548000	8086600	8992200	7999600	7882200	9.30773e+06	9.87097e+06	8.35947e+06					0.239832	-6.32782	0.0479709	0.324593	-7.28465	0.0201046	0.0848125	-1.20291	0.520238	0.0847615	-0.45292	0.845221	-0.155019	-4.1715	0.0988424	-0.23978	-5.09884	0.0767309	91.195
sp	Homo sapiens	O00308	WWP2_HUMAN	WWP2	NEDD4-like E3 ubiquitin-protein ligase WWP2	cytoplasm [GO:0005737]; cytosol [GO:0005829]; extracellular exosome [GO:0070062]; membrane [GO:0016020]; nucleus [GO:0005634]; ubiquitin ligase complex [GO:0000151]	TRUE	4	108.08	5310000	208660	246320	216890	257840	209400	238340	256540	250930	230970	242160	241650	208390	223957	235193	246147	230733	0.594993	0.617419	1.09908		0.0706276	-1.43087	0.53201	0.136299	-2.09034	0.34606	0.0430068	-0.851792	0.629271	0.065671	-0.407293	0.854975	-0.0276207	-0.407293	0.813679	-0.0932918	-0.906752	0.660682	89.1681
sp	Homo sapiens	O00311	CDC7_HUMAN	CDC7	Cell division cycle 7-related protein kinase	cytoplasm [GO:0005737]; intercellular bridge [GO:0045171]; mitotic spindle [GO:0072686]; nucleoplasm [GO:0005654]; nucleus [GO:0005634]	FALSE	1	31.39	297000	20303	19978	25311	21655	22241	16844	22233	22412	16525	15585	27648	15465	21864	20246.7	20390	19566					-0.110873	-0.797957	0.712371	-0.100696	-0.562739	0.763727	-0.160209	-1.32608	0.484727	0.0101774	-0.178066	0.934149	-0.0493356	-0.376101	0.82404	-0.0595129	-0.594194	0.77649	98.9586
sp	Homo sapiens	O00327	BMAL1_HUMAN	ARNTL	Aryl hydrocarbon receptor nuclear translocator-like protein 1	chromatoid body [GO:0033391]; intracellular membrane-bounded organelle [GO:0043231]; nuclear chromatin [GO:0000790]; nucleoplasm [GO:0005654]; nucleus [GO:0005634]; PML body [GO:0016605]; transcription regulator complex [GO:0005667]	FALSE	2	66.2	3050000	587080	580010	702850	627070	662420	722550	666030	843790	662460	653480	681130	645820	623313	670680	724093	660143					0.105667	-1.59032	0.49356	0.216218	-2.84184	0.230209	0.0828217	-1.05222	0.564033	0.110551	-0.78842	0.729496	-0.0228453	-0.357689	0.830535	-0.133396	-1.29011	0.546818	87.6818
sp	Homo sapiens	O00330	ODPX_HUMAN	PDHX	Pyruvate dehydrogenase protein X component mitochondrial	mitochondrial matrix [GO:0005759]; mitochondrion [GO:0005739]; pyruvate dehydrogenase complex [GO:0045254]	FALSE	7	128.65	62600000	2162200	2075200	1978900	2200400	2363500	2533300	2211000	2010600	2116200	1878400	2054000	1755300	2072100	2.36573e+06	2112600	1895900					0.191194	-5.15361	0.0879147	0.027926	-0.523542	0.779277	-0.128211	-2.28621	0.278034	-0.163268	-4.10003	0.181949	-0.319405	-8.76701	0.0074941	-0.156137	-3.22485	0.201769	102.397
sp	Homo sapiens	O00391	QSOX1_HUMAN	QSOX1	Sulfhydryl oxidase 1	endoplasmic reticulum lumen [GO:0005788]; extracellular exosome [GO:0070062]; extracellular region [GO:0005576]; extracellular space [GO:0005615]; Golgi apparatus [GO:0005794]; Golgi membrane [GO:0000139]; integral component of Golgi membrane [GO:0030173]; intercellular bridge [GO:0045171]; intracellular membrane-bounded organelle [GO:0043231]; platelet alpha granule lumen [GO:0031093]; specific …	TRUE	5	116.31	56800000	4650100	3645600	4150700	2347700	2421300	2489800	1976100	1777100	2021100	2280200	2826400	2507300	4148800	2419600	1.92477e+06	2.53797e+06	4.10305e-05	0.000259201	2.15548	1	-0.777926	-17.9249	0.000151209	-1.10801	-23.6179	3.71697e-06	-0.709021	-16.5755	6.66533e-05	-0.330085	-7.6134	0.0483552	0.0689046	-0.97249	0.601126	0.39899	-9.42887	0.00824731	168.617
sp	Homo sapiens	O00400	ACATN_HUMAN	SLC33A1	Acetyl-coenzyme A transporter 1	endoplasmic reticulum membrane [GO:0005789]; Golgi membrane [GO:0000139]; integral component of plasma membrane [GO:0005887]; membrane [GO:0016020]	TRUE	8	157.54	194000000	10026000	8138000	8324200	11705000	10726000	11728000	13573000	11349000	12283000	8916600	10801000	10512000	8829400	1.13863e+07	1.24017e+07	1.00765e+07	0.0094836	0.0161315	1.40459		0.366916	-7.34754	0.0287371	0.490147	-9.65885	0.00547045	0.190612	-2.81378	0.204102	0.123231	-1.30895	0.597547	-0.176304	-3.20349	0.172079	-0.299535	-5.44301	0.0633687	93.9337
sp	Homo sapiens	O00401	WASL_HUMAN	WASL	Neural Wiskott-Aldrich syndrome protein	actin cap [GO:0030478]; actin cytoskeleton [GO:0015629]; actin filament [GO:0005884]; cytoplasmic vesicle [GO:0031410]; cytosol [GO:0005829]; endocytic vesicle membrane [GO:0030666]; extracellular exosome [GO:0070062]; lamellipodium [GO:0030027]; nucleus [GO:0005634]; plasma membrane [GO:0005886]	TRUE	1	40.75	1530000	35445	43220	39056	45193	35801	43388	42906	40507	37100	61774	59655	65172	39240.3	41460.7	40171	62200.3					0.079406	-0.822372	0.704226	0.0338171	-0.373201	0.837647	0.664585	-13.905	0.000301577	-0.0455889	-0.370788	0.862169	0.585179	-12.5192	0.00101421	0.630768	-13.2189	0.00147583	77.4448
sp	Homo sapiens	O00410	IPO5_HUMAN	IPO5	Importin-5	cytoplasm [GO:0005737]; membrane [GO:0016020]; nuclear pore [GO:0005643]; nucleolus [GO:0005730]; nucleus [GO:0005634]	FALSE	26	334.99	759000000	16986000	15797000	16249000	18087000	17801000	18950000	23056000	19207000	20053000	14432000	17469000	16676000	16344000	1.82793e+07	20772000	1.61923e+07					0.161452	-2.97114	0.252765	0.345879	-8.29205	0.0115574	-0.0134502	-0.0506251	0.974331	0.184427	-3.9132	0.196948	-0.174903	-3.07735	0.184832	-0.359329	-8.41042	0.0137658	94.9102
sp	Homo sapiens	O00411	RPOM_HUMAN	POLRMT	DNA-directed RNA polymerase mitochondrial	mitochondrial DNA-directed RNA polymerase complex [GO:0034245]; mitochondrial matrix [GO:0005759]; mitochondrial nucleoid [GO:0042645]; mitochondrion [GO:0005739]; protein-containing complex [GO:0032991]	FALSE	12	221.26	167000000	8803100	8843500	8510200	7918700	7460500	8538600	7732000	6791700	7296700	5384600	6551500	5600300	8.71893e+06	7972600	7.27347e+06	5.84547e+06					-0.129101	-3.28805	0.219323	-0.261509	-6.2027	0.036379	-0.576833	-15.438	0.000126595	-0.132407	-1.79817	0.484673	-0.447732	-11.3346	0.00182698	-0.315325	-8.44715	0.0135086	118.121
sp	Homo sapiens	O00421	CCRL2_HUMAN	CCRL2	C-C chemokine receptor-like 2	cytoplasm [GO:0005737]; external side of plasma membrane [GO:0009897]; integral component of plasma membrane [GO:0005887]; plasma membrane [GO:0005886]	TRUE	2	70.22	71800000	4298400	3674100	4068100	5110700	4636700	4520100	3786000	3261700	3475900	3672800	3592100	3341900	4.01353e+06	4.75583e+06	3.50787e+06	3535600	0.00186966	0.0043445	1.35576		0.244825	-4.71954	0.108342	-0.194279	-4.00021	0.121348	-0.182918	-3.15821	0.166262	-0.439104	-10.2011	0.0198407	-0.427743	-9.32339	0.00547816	0.0113612	-0.429786	0.828511	108.732
sp	Homo sapiens	O00422	SAP18_HUMAN	SAP18	Histone deacetylase complex subunit SAP18	ASAP complex [GO:0061574]; cytosol [GO:0005829]; histone deacetylase complex [GO:0000118]; nuclear body [GO:0016604]; nuclear speck [GO:0016607]; nucleoplasm [GO:0005654]	FALSE	3	56.38	24700000	526040	547760	582240	567850	654500	648100	844140	735690	903690	836370	1021600	755280	552013	623483	827840	871083					0.175648	-1.87274	0.430814	0.584649	-10.6901	0.00318646	0.658108	-12.0031	0.000887028	0.409001	-7.66381	0.0471934	0.48246	-9.07182	0.00628109	0.0734588	-0.716119	0.726311	73.2029
sp	Homo sapiens	O00423	EMAL1_HUMAN	EML1	Echinoderm microtubule-associated protein-like 1	cytosol [GO:0005829]; microtubule [GO:0005874]; microtubule associated complex [GO:0005875]; mitotic spindle midzone [GO:1990023]; mitotic spindle pole [GO:0097431]; perinuclear region of cytoplasm [GO:0048471]	FALSE	2	93.79	5470000	979800	949280	999420	1240500	1113200	1357100	1331500	1172900	1479800	1194000	1442100	1220800	976167	1.23693e+06	1.32807e+06	1.28563e+06					0.341568	-6.82947	0.0368009	0.444128	-9.23126	0.00680829	0.39728	-8.43898	0.00709522	0.10256	-1.36253	0.583578	0.0557115	-0.830446	0.649932	-0.0468483	-0.375387	0.844236	81.1967
sp	Homo sapiens	O00425	IF2B3_HUMAN	IGF2BP3	Insulin-like growth factor 2 mRNA-binding protein 3	cytoplasm [GO:0005737]; cytosol [GO:0005829]; nucleus [GO:0005634]	FALSE	15	228.45	101000000	6323300	6254300	5940000	5610900	6529200	6691600	8693300	7165600	7883700	7206700	7423900	7063700	6.17253e+06	6.27723e+06	7914200	7.23143e+06					0.0242661	-0.0936956	0.965736	0.358581	-8.79777	0.00871621	0.228419	-5.11044	0.0522104	0.334315	-8.5829	0.033866	0.204153	-4.89604	0.0651581	-0.130162	-2.34821	0.317369	91.6573
sp	Homo sapiens	O00429	DNM1L_HUMAN	DNM1L	Dynamin-1-like protein	brush border [GO:0005903]; clathrin-coated pit [GO:0005905]; cytoplasm [GO:0005737]; cytosol [GO:0005829]; endoplasmic reticulum [GO:0005783]; endoplasmic reticulum membrane [GO:0005789]; Golgi apparatus [GO:0005794]; Golgi membrane [GO:0000139]; intracellular membrane-bounded organelle [GO:0043231]; membrane [GO:0016020]; microtubule [GO:0005874]; mitochondrial membrane [GO:0031966]; mitochondri…	FALSE	21	236.76	297000000	9605600	10528000	9793500	10150000	12652000	12156000	13600000	12104000	13160000	13193000	14402000	13189000	9975700	1.16527e+07	1.29547e+07	1.35947e+07					0.22417	-4.91263	0.0983753	0.376982	-8.75988	0.00889715	0.446551	-12.3953	0.000706796	0.152812	-2.48421	0.362616	0.222381	-6.13697	0.0323785	0.0695689	-2.48421	0.296345	79.7514
sp	Homo sapiens	O00442	RTCA_HUMAN	RTCA	RNA 3'-terminal phosphate cyclase	nucleoplasm [GO:0005654]; nucleus [GO:0005634]	FALSE	5	108.93	56400000	1598600	1691600	1757600	2872500	2954800	3010400	4030200	3606100	3744400	2873500	3221900	3228900	1682600	2945900	3.79357e+06	3108100					0.808016	-24.1164	6.78015e-06	1.17286	-29.7493	2.22028e-07	0.885341	-25.3838	8.26146e-07	0.364846	-10.7854	0.016323	0.0773245	-1.41373	0.472175	-0.287522	-8.37747	0.0139614	55.458
sp	Homo sapiens	O00443	P3C2A_HUMAN	PIK3C2A	Phosphatidylinositol 4-phosphate 3-kinase C2 domain-containing subunit alpha	clathrin-coated vesicle [GO:0030136]; cytoplasm [GO:0005737]; cytosol [GO:0005829]; extracellular exosome [GO:0070062]; Golgi apparatus [GO:0005794]; membrane [GO:0016020]; nucleoplasm [GO:0005654]; phosphatidylinositol 3-kinase complex [GO:0005942]; plasma membrane [GO:0005886]; vesicle [GO:0031982]	TRUE	28	282.29	348000000	10891000	13726000	10705000	10128000	10619000	11293000	12015000	13088000	12154000	11791000	10600000	10931000	11774000	10680000	12419000	1.11073e+07	0.210707	0.238879	1.16283		-0.140693	-3.25001	0.222433	0.0769445	-0.38835	0.83143	-0.084092	-1.6994	0.391044	0.217637	-4.02161	0.188253	0.0566008	-0.983152	0.597909	-0.161037	-2.35894	0.316116	94.7449
sp	Homo sapiens	O00458	IFRD1_HUMAN	IFRD1	Interferon-related developmental regulator 1	nucleus [GO:0005634]	FALSE	1	41.91	2730000	155540	129980	175440	109380	76715	103680	87519	90176	97550	74217	98371	71522	153653	96591.7	91748.3	81370					-0.669708	-9.44213	0.0102535	-0.743925	-9.97856	0.00467313	-0.91711	-13.0367	0.000490243	-0.0742168	-0.250243	0.896928	-0.247402	-2.50886	0.255977	-0.173185	-2.05203	0.371063	146.957
sp	Homo sapiens	O00459	P85B_HUMAN	PIK3R2	Phosphatidylinositol 3-kinase regulatory subunit beta	cytosol [GO:0005829]; nucleus [GO:0005634]; phosphatidylinositol 3-kinase complex [GO:0005942]	FALSE	1	57.53	3060000	59581	66884	64359	39581	44825	55998	62582	55744	62519	52200	64931	56605	63608	46801.3	60281.7	57912					-0.442659	-8.41367	0.0169549	-0.0774889	-1.40433	0.497416	-0.135346	-1.96898	0.334662	0.36517	-5.93676	0.0889352	0.307313	-5.18885	0.0550892	-0.057857	-0.347757	0.850107	104.252
sp	Homo sapiens	O00461	GOLI4_HUMAN	GOLIM4	Golgi integral membrane protein 4	cis-Golgi network [GO:0005801]; endocytic vesicle [GO:0030139]; endosome membrane [GO:0010008]; Golgi apparatus [GO:0005794]; Golgi cisterna membrane [GO:0032580]; Golgi lumen [GO:0005796]; Golgi membrane [GO:0000139]; integral component of membrane [GO:0016021]; membrane [GO:0016020]; transport vesicle [GO:0030133]	FALSE	18	237.87	149000000	2787600	2450100	2698800	5948200	5822300	7243900	10058000	8810000	10208000	8505100	11472000	8931600	2645500	6.33813e+06	9692000	9.63623e+06					1.26052	-20.9796	2.92546e-05	1.87325	-27.6776	5.43046e-07	1.86493	-27.3775	3.7146e-07	0.612736	-11.2527	0.0145474	0.604411	-10.6153	0.00266113	-0.00832508	-0.312283	0.862897	39.3842
sp	Homo sapiens	O00468	AGRIN_HUMAN	AGRN	Agrin	basement membrane [GO:0005604]; collagen-containing extracellular matrix [GO:0062023]; cytosol [GO:0005829]; extracellular exosome [GO:0070062]; extracellular region [GO:0005576]; Golgi lumen [GO:0005796]; integral component of membrane [GO:0016021]; lysosomal lumen [GO:0043202]; plasma membrane [GO:0005886]; synapse [GO:0045202]	TRUE	22	249.56	532000000	12335000	13789000	12902000	8894400	9080500	10314000	8302700	7249000	8455600	6227500	8091400	6596500	1.30087e+07	9.42963e+06	8.00243e+06	6971800	0.000213522	0.000832712	1.8659	1	-0.4642	-11.0488	0.00477397	-0.700962	-16.3762	0.000162812	-0.89987	-20.1478	9.98096e-06	-0.236763	-4.71896	0.144321	-0.43567	-10.0552	0.00363448	-0.198908	-3.85666	0.14531	131.881
sp	Homo sapiens	O00469	PLOD2_HUMAN	PLOD2	Procollagen-lysine 2-oxoglutarate 5-dioxygenase 2	endoplasmic reticulum [GO:0005783]; endoplasmic reticulum membrane [GO:0005789]; extracellular exosome [GO:0070062]; rough endoplasmic reticulum membrane [GO:0030867]	TRUE	13	194.22	249000000	4687900	4133700	4946400	4504300	5441300	5490600	4907200	5193800	4896000	7533800	8607200	8682000	4.58933e+06	5145400	4999000	8.27433e+06	0.000107326	0.000510315	1.80295	5	0.164999	-3.02584	0.246099	0.123355	-1.61249	0.446157	0.850358	-17.7228	3.56798e-05	-0.0416437	-0.898424	0.700013	0.68536	-14.2489	0.000427687	0.727004	-15.6439	0.000582468	81.5001
sp	Homo sapiens	O00471	EXOC5_HUMAN	EXOC5	Exocyst complex component 5	cytoplasm [GO:0005737]; cytosol [GO:0005829]; exocyst [GO:0000145]; midbody [GO:0030496]	FALSE	21	228.59	656000000	13679000	16770000	13070000	16891000	16607000	18186000	20600000	17035000	18947000	11393000	14348000	13123000	1.45063e+07	17228000	1.88607e+07	1.29547e+07					0.248072	-4.15334	0.143505	0.378698	-6.97317	0.0237921	-0.163211	-2.23313	0.287724	0.130625	-1.67715	0.509539	-0.411283	-7.68229	0.0136178	-0.541909	-10.4657	0.0049555	86.0996
sp	Homo sapiens	O00476	NPT4_HUMAN	SLC17A3	Sodium-dependent phosphate transport protein 4	apical plasma membrane [GO:0016324]; brush border membrane [GO:0031526]; cytoplasm [GO:0005737]; endoplasmic reticulum membrane [GO:0005789]; integral component of membrane [GO:0016021]; integral component of plasma membrane [GO:0005887]; lysosome [GO:0005764]; perinuclear region of cytoplasm [GO:0048471]; plasma membrane [GO:0005886]	TRUE	2	55.33	6880000	229180	211570	194480	242730	240220	249430	193530	185540	197330	202040	242340	178540	211743	244127	192133	207640	0.0569693	0.0744239	1.27061		0.205313	-3.42167	0.205773	-0.140209	-1.91315	0.381035	-0.0282322	-0.787592	0.651673	-0.345522	-6.49848	0.0702855	-0.233546	-4.89012	0.0653465	0.111977	-0.833019	0.684296	107.138
sp	Homo sapiens	O00478	BT3A3_HUMAN	BTN3A3	Butyrophilin subfamily 3 member A3	external side of plasma membrane [GO:0009897]; integral component of membrane [GO:0016021]; membrane [GO:0016020]; plasma membrane [GO:0005886]	TRUE	2	118	17500000	371850	327440	335970	496490	475390	423230	411140	417770	459400	599000	459400	519380	345087	465037	429437	525927	0.00295814	0.00619987	1.52404	4	0.430386	-8.98972	0.0127555	0.315487	-5.68969	0.0481698	0.607903	-12.8471	0.000546238	-0.114899	-2.03238	0.441371	0.177517	-2.72008	0.226941	0.292416	-5.86198	0.0508279	84.2487
sp	Homo sapiens	O00481	BT3A1_HUMAN	BTN3A1	Butyrophilin subfamily 3 member A1	external side of plasma membrane [GO:0009897]; integral component of membrane [GO:0016021]; plasma membrane [GO:0005886]	TRUE	1	97.02	0	253760	243630	221220	247370	233190	234420	244990	178070	213120	279590	355690	274500	239537	238327	212060	303260					-0.00730613	-0.702849	0.742417	-0.175774	-3.49279	0.160833	0.340309	-4.94683	0.0576852	-0.168468	-2.26842	0.399735	0.347615	-6.33916	0.0287367	0.516083	-9.90371	0.0065179	102.201
sp	Homo sapiens	O00483	NDUA4_HUMAN	NDUFA4	Cytochrome c oxidase subunit NDUFA4	integral component of membrane [GO:0016021]; mitochondrial inner membrane [GO:0005743]; mitochondrial respiratory chain complex I [GO:0005747]; mitochondrial respiratory chain complex IV [GO:0005751]; mitochondrion [GO:0005739]	FALSE	6	105.8	1670000000	5013200	5359000	5811500	4837600	5594800	5822400	5140100	5242700	5364300	4404900	5460300	4672800	5.39457e+06	5.41827e+06	5.24903e+06	4846000					0.00632432	-0.207293	0.920141	-0.0394553	-0.665911	0.726352	-0.154713	-2.55813	0.236938	-0.0457796	-0.408817	0.854526	-0.161037	-2.17093	0.310285	-0.115257	-1.50082	0.489881	95.9103
sp	Homo sapiens	O00487	PSDE_HUMAN	PSMD14	26S proteasome non-ATPase regulatory subunit 14	cytosol [GO:0005829]; cytosolic proteasome complex [GO:0031597]; extracellular region [GO:0005576]; ficolin-1-rich granule lumen [GO:1904813]; nucleoplasm [GO:0005654]; nucleus [GO:0005634]; proteasome accessory complex [GO:0022624]; proteasome complex [GO:0000502]; proteasome regulatory particle, lid subcomplex [GO:0008541]; secretory granule lumen [GO:0034774]	TRUE	7	157.92	83700000	1358100	1438600	1472300	1370400	1459900	1547200	1592100	1730200	1646900	2241100	2103000	1870900	1423000	1.45917e+06	1656400	2.07167e+06	0.000295817	0.00105547	1.45584		0.036209	-0.710816	0.739761	0.219115	-4.75596	0.0803333	0.541856	-13.2447	0.00043548	0.182906	-3.41386	0.243176	0.505647	-11.9934	0.00132488	0.322741	-7.26621	0.0242591	82.1817
sp	Homo sapiens	O00499	BIN1_HUMAN	BIN1	Myc box-dependent-interacting protein 1	actin cytoskeleton [GO:0015629]; axon [GO:0030424]; axon initial segment [GO:0043194]; cytoplasm [GO:0005737]; cytosol [GO:0005829]; endosome [GO:0005768]; I band [GO:0031674]; lipid tube [GO:0060987]; membrane [GO:0016020]; node of Ranvier [GO:0033268]; nuclear envelope [GO:0005635]; nucleus [GO:0005634]; plasma membrane [GO:0005886]; synaptic vesicle [GO:0008021]; T-tubule [GO:0030315]; Z disc …	TRUE	2	57.54	4380000	637710	694360	655300	610270	669060	821720	1088300	786010	914220	1149400	1139600	1009500	662457	700350	929510	1099500	0.00244126	0.00532683	1.65973	4	0.08025	-0.668339	0.754418	0.488644	-8.70493	0.00915709	0.73095	-12.5871	0.000634654	0.408394	-7.37173	0.0521768	0.6507	-11.374	0.0017925	0.242305	-2.71589	0.263178	75.2057
sp	Homo sapiens	O00505	IMA4_HUMAN	KPNA3	Importin subunit alpha-4	cytosol [GO:0005829]; host cell [GO:0043657]; nuclear pore [GO:0005643]; nucleoplasm [GO:0005654]; nucleus [GO:0005634]	FALSE	4	165.9	27600000	1301700	6611700	1081600	1259300	1153000	1244900	1578700	1546600	1927700	2062800	1835800	1741900	2.99833e+06	1.21907e+06	1.68433e+06	1.88017e+06					-1.29838	-2.90588	0.260981	-0.831983	-0.811442	0.672782	-0.6733	-0.394371	0.811306	0.466401	-1.61631	0.524883	0.625084	-2.19131	0.306667	0.158683	-0.340756	0.852516	66.9091
sp	Homo sapiens	O00507	USP9Y_HUMAN	USP9Y	Probable ubiquitin carboxyl-terminal hydrolase FAF-Y	cytoplasm [GO:0005737]; cytosol [GO:0005829]; nucleus [GO:0005634]	FALSE	4	238.05	5260000	537740	645310	570960	607970	580710	665780	620160	560200	639840	413240	533020	491120	584670	618153	606733	479127					0.0803422	-0.881577	0.686172	0.05344	-0.881577	0.649303	-0.287215	-5.18394	0.050011	-0.0269022	0	1	-0.367558	-6.87679	0.0212833	-0.340655	-6.87679	0.0295676	93.9824
sp	Homo sapiens	O00522	KRIT1_HUMAN	KRIT1	Krev interaction trapped protein 1	cell-cell junction [GO:0005911]; cytoplasm [GO:0005737]; cytoskeleton [GO:0005856]; extracellular space [GO:0005615]; plasma membrane [GO:0005886]	TRUE	6	132.13	17100000	1843000	1865400	1873500	1666700	1679100	1768700	1727700	1655600	1755200	1900000	2017500	1838400	1.86063e+06	1.70483e+06	1.71283e+06	1.91863e+06	0.00453218	0.00871273	1.12541		-0.126163	-1.76068	0.454537	-0.119409	-2.81139	0.233975	0.0442852	-1.18724	0.523864	0.00675407	-0.634116	0.78605	0.170448	-3.60769	0.136291	0.163694	-4.83258	0.0874248	102.433
sp	Homo sapiens	O00533	NCHL1_HUMAN	CHL1	Neural cell adhesion molecule L1-like protein	apical part of cell [GO:0045177]; dendrite [GO:0030425]; extracellular exosome [GO:0070062]; integral component of membrane [GO:0016021]; plasma membrane [GO:0005886]	TRUE	12	178.94	160000000	7428900	6520100	7376300	6068000	6211500	6011300	4870100	4087300	4810000	4025400	4600500	3984900	7.10843e+06	6.09693e+06	4.58913e+06	4203600	7.18621e-05	0.00038802	1.69103	1	-0.221448	-4.69627	0.109244	-0.63131	-15.6471	0.000238557	-0.757906	-19.2242	1.64096e-05	-0.409862	-10.1833	0.0199799	-0.536458	-14.5655	0.000371427	-0.126596	-3.4215	0.182563	135.083
sp	Homo sapiens	O00541	PESC_HUMAN	PES1	Pescadillo homolog	condensed chromosome [GO:0000793]; cytosol [GO:0005829]; membrane [GO:0016020]; nucleolus [GO:0005730]; nucleoplasm [GO:0005654]; PeBoW complex [GO:0070545]; preribosome, large subunit precursor [GO:0030687]	FALSE	16	195.44	441000000	18961000	17189000	18291000	19782000	19259000	19627000	18253000	16257000	19021000	17470000	20448000	17307000	18147000	19556000	1.78437e+07	1.84083e+07					0.10788	-1.48358	0.518527	-0.024319	-0.149354	0.930833	0.0206279	-0.288968	0.859506	-0.132199	-1.73683	0.497749	-0.0872523	-1.04621	0.57861	0.0449469	-0.464924	0.819937	102.554
sp	Homo sapiens	O00559	RCAS1_HUMAN	EBAG9	Receptor-binding cancer antigen expressed on SiSo cells	Golgi membrane [GO:0000139]; integral component of membrane [GO:0016021]; secretory granule [GO:0030141]	FALSE	1	41.81	2450000	62934	62869	123250	103340	71654	80505	139390	124310	164250	145070	137650	131990	83017.7	85166.3	142650	138237					0.0368649	-0.705936	0.741249	0.780989	-8.40775	0.0108632	0.73565	-8.02025	0.00906105	0.744125	-7.0057	0.059756	0.698785	-6.61405	0.0246455	-0.0453394	-0.171837	0.929156	56.0571
sp	Homo sapiens	O00562	PITM1_HUMAN	PITPNM1	Membrane-associated phosphatidylinositol transfer protein 1	cell body [GO:0044297]; cleavage furrow [GO:0032154]; cytoplasm [GO:0005737]; cytoplasmic ribonucleoprotein granule [GO:0036464]; cytosol [GO:0005829]; endoplasmic reticulum membrane [GO:0005789]; Golgi cisterna membrane [GO:0032580]; lipid droplet [GO:0005811]; membrane [GO:0016020]; midbody [GO:0030496]	FALSE	7	147.98	19300000	761980	799040	795370	718900	765880	832510	923460	953410	946540	1267000	1016500	1134900	785463	772430	941137	1.13947e+06					-0.0241397	-0.0318477	0.989047	0.26086	-6.94902	0.0240927	0.536743	-14.1014	0.000269222	0.285	-7.02488	0.0593938	0.560883	-14.1647	0.00044082	0.275883	-6.06593	0.0451947	83.7687
sp	Homo sapiens	O00567	NOP56_HUMAN	NOP56	Nucleolar protein 56	box C/D snoRNP complex [GO:0031428]; cytoplasm [GO:0005737]; fibrillar center [GO:0001650]; membrane [GO:0016020]; nucleolus [GO:0005730]; nucleoplasm [GO:0005654]; pre-snoRNP complex [GO:0070761]; small nucleolar ribonucleoprotein complex [GO:0005732]; small-subunit processome [GO:0032040]	FALSE	28	295.65	1470000000	41710000	38372000	40638000	46105000	47960000	46757000	53534000	48001000	52317000	32286000	38676000	41354000	40240000	4.69407e+07	51284000	3.74387e+07					0.222208	-4.69297	0.109363	0.349878	-7.34293	0.0195137	-0.104101	-2.17705	0.296687	0.12767	-1.5362	0.54253	-0.326309	-8.17067	0.0103164	-0.45398	-10.7488	0.00428316	94.8475
sp	Homo sapiens	O00571	DDX3X_HUMAN	DDX3X	ATP-dependent RNA helicase DDX3X	cell leading edge [GO:0031252]; centrosome [GO:0005813]; cytoplasm [GO:0005737]; cytoplasmic stress granule [GO:0010494]; cytosol [GO:0005829]; extracellular exosome [GO:0070062]; extracellular region [GO:0005576]; ficolin-1-rich granule lumen [GO:1904813]; lamellipodium [GO:0030027]; NLRP3 inflammasome complex [GO:0072559]; nucleoplasm [GO:0005654]; nucleus [GO:0005634]; P granule [GO:0043186]; …	TRUE	10	342.03	890000000	8450500	10500000	10346000	8135300	7734600	7542100	8544500	11827000	8741800	11855000	8222500	11597000	9765500	7804000	9.70443e+06	1.05582e+07	0.185968	0.213877	1.35292		-0.32348	-3.71504	0.177637	-0.00904994	-0.0575505	0.972881	0.112594	-1.16611	0.530018	0.31443	-3.58902	0.226114	0.436074	-5.79011	0.0393335	0.121643	-1.25845	0.555131	89.3474
sp	Homo sapiens	O00592	PODXL_HUMAN	PODXL	Podocalyxin	apical plasma membrane [GO:0016324]; centriolar satellite [GO:0034451]; cytoplasm [GO:0005737]; extracellular exosome [GO:0070062]; extracellular space [GO:0005615]; filopodium [GO:0030175]; integral component of plasma membrane [GO:0005887]; intracellular membrane-bounded organelle [GO:0043231]; lamellipodium [GO:0030027]; membrane raft [GO:0045121]; microvillus membrane [GO:0031528]; nucleolus …	TRUE	13	225.22	3600000000	41819000	48650000	42014000	67147000	64175000	64205000	70639000	58235000	64656000	49164000	68130000	56690000	44161000	6.51757e+07	64510000	5.79947e+07	0.00615373	0.011184	1.47586		0.561561	-11.2766	0.00430047	0.54675	-11.2766	0.00231593	0.393147	-8.27589	0.00778887	-0.0148106	-3.4597e-14	1	-0.168413	-1.88329	0.363006	-0.153603	-1.88329	0.406282	72.1511
sp	Homo sapiens	O00622	CCN1_HUMAN	CCN1	CCN family member 1	collagen-containing extracellular matrix [GO:0062023]; endoplasmic reticulum lumen [GO:0005788]; extracellular matrix [GO:0031012]	TRUE	4	135.84	108000000	2029300	2072500	1232000	2108100	2384900	1977000	1470000	1236500	1627400	1978500	2884600	2489900	1.77793e+06	2.15667e+06	1.44463e+06	2451000	0.0445528	0.0602503	1.69662		0.278602	-2.57206	0.306269	-0.299498	-2.44736	0.285482	0.463169	-4.55863	0.0726537	-0.5781	-6.19694	0.0796747	0.184567	-1.18496	0.53627	0.762667	-8.35836	0.0140447	103.665
sp	Homo sapiens	O00629	IMA3_HUMAN	KPNA4	Importin subunit alpha-3	cytosol [GO:0005829]; nuclear membrane [GO:0031965]; nucleoplasm [GO:0005654]; nucleus [GO:0005634]	FALSE	4	149.47	19900000	675510	652980	581910	726690	702380	746220	938950	946760	874440	1111600	912530	952900	636800	725097	920050	992343					0.187333	-3.07137	0.242086	0.530872	-12.138	0.00148072	0.639999	-15.325	0.000134779	0.343539	-7.80512	0.0453339	0.452666	-11.4257	0.00174731	0.109127	-2.39518	0.310552	82.5229
sp	Homo sapiens	O00712	NFIB_HUMAN	NFIB	Nuclear factor 1 B-type	cerebellar mossy fiber [GO:0044300]; fibrillar center [GO:0001650]; nuclear chromatin [GO:0000790]; nucleoplasm [GO:0005654]; nucleus [GO:0005634]	FALSE	1	75.24	5400000	248830	346620	290380	298510	271410	305190	278860	309220	305330	438840	367360	339600	295277	291703	297803	381933					-0.0175655	-0.336975	0.872247	0.0122925	-0.336975	0.85117	0.371253	-7.4377	0.0129091	0.029858	-3.31555e-14	1	0.388819	-6.70494	0.0234052	0.358961	-6.70494	0.0321246	78.5748
sp	Homo sapiens	O00716	E2F3_HUMAN	E2F3	Transcription factor E2F3	nuclear chromatin [GO:0000790]; nucleoplasm [GO:0005654]; nucleus [GO:0005634]; RNA polymerase II transcription regulator complex [GO:0090575]	FALSE	1	32.77	725000	75040	51076	77805	110130	72448	85932	118160	68865	92530	74360	79098	80618	67973.7	89503.3	93185	78025.3					0.396965	-3.54904	0.192889	0.455122	-4.7982	0.0785473	0.198967	-2.03758	0.32142	0.0581563	-0.65034	0.780256	-0.197999	-0.913628	0.62033	-0.256155	-1.83353	0.415757	91.3208
sp	Homo sapiens	O00743	PPP6_HUMAN	PPP6C	Serine/threonine-protein phosphatase 6 catalytic subunit	cytosol [GO:0005829]; Golgi membrane [GO:0000139]; mitochondrion [GO:0005739]	FALSE	1	31.19	1600000	41360	55895	84042	53008	64753	68984	91835	62810	98679	85699	85944	73436	60432.3	62248.3	84441.3	81693					0.0427146	-0.604281	0.778134	0.482629	-4.15268	0.111302	0.434892	-4.15268	0.0927467	0.439914	-3.01664	0.287902	0.392177	-3.01664	0.191286	-0.0477369	-3.31555e-14	1	57.2823
sp	Homo sapiens	O00750	P3C2B_HUMAN	PIK3C2B	Phosphatidylinositol 4-phosphate 3-kinase C2 domain-containing subunit beta	cytoplasm [GO:0005737]; cytosol [GO:0005829]; endocytic vesicle [GO:0030139]; endoplasmic reticulum [GO:0005783]; membrane [GO:0016020]; nucleoplasm [GO:0005654]; phosphatidylinositol 3-kinase complex [GO:0005942]; plasma membrane [GO:0005886]	TRUE	4	93.66	6030000	1060400	1072000	961460	938620	864070	974540	919820	940890	985390	813200	906600	891730	1.03129e+06	925743	948700	870510	0.0319718	0.0450632	1.18469		-0.155761	-3.96768	0.157245	-0.120422	-3.01537	0.209126	-0.244513	-5.99688	0.0307329	0.0353397	-0.497017	0.836349	-0.0887514	-1.12469	0.554715	-0.124091	-1.87374	0.407834	112.323
sp	Homo sapiens	O00754	MA2B1_HUMAN	MAN2B1	Lysosomal alpha-mannosidase	azurophil granule lumen [GO:0035578]; extracellular exosome [GO:0070062]; extracellular region [GO:0005576]; extracellular space [GO:0005615]; lysosomal lumen [GO:0043202]; lysosome [GO:0005764]; vacuolar membrane [GO:0005774]	TRUE	2	93.13	2250000	367650	561170	332940	346520	332140	315960	395040	308450	435040	436170	687580	467360	420587	331540	379510	530370	0.130534	0.15583	1.59972		-0.34322	-2.41144	0.33093	-0.148265	-0.867854	0.653194	0.334596	-2.78382	0.207549	0.194955	-1.14434	0.637204	0.677816	-6.40056	0.0278424	0.482861	-4.32425	0.114275	88.4834
sp	Homo sapiens	O00763	ACACB_HUMAN	ACACB	Acetyl-CoA carboxylase 2	cytosol [GO:0005829]; mitochondrial outer membrane [GO:0005741]; mitochondrion [GO:0005739]; nucleus [GO:0005634]	FALSE	78	446.74	5810000000	177090000	187270000	195010000	129810000	127190000	127810000	122750000	97394000	108270000	60119000	80240000	65433000	1.86457e+08	128270000	1.09471e+08	6.85973e+07					-0.539657	-9.66475	0.00913265	-0.768287	-14.1763	0.000524766	-1.44262	-23.7361	1.7183e-06	-0.228631	-3.48641	0.235765	-0.902959	-16.5577	0.000146876	-0.674329	-12.4482	0.00201387	143.743
sp	Homo sapiens	O00764	PDXK_HUMAN	PDXK	Pyridoxal kinase	cytosol [GO:0005829]; extracellular exosome [GO:0070062]; extracellular region [GO:0005576]; nucleoplasm [GO:0005654]; nucleus [GO:0005634]; secretory granule lumen [GO:0034774]; specific granule lumen [GO:0035580]	TRUE	3	61.76	15200000	162220	248220	122590	168800	138680	197630	303070	246840	255160	339880	293310	242570	177677	168370	268357	291920	0.0286998	0.040921	1.7338	4	-0.0776191	-0.0366001	0.987736	0.594897	-6.49271	0.0309844	0.716319	-8.12633	0.00851779	0.672517	-6.57976	0.068541	0.793938	-8.21253	0.01011	0.121421	-0.842981	0.681531	71.5948
sp	Homo sapiens	O00767	ACOD_HUMAN	SCD	Acyl-CoA desaturase	endoplasmic reticulum [GO:0005783]; endoplasmic reticulum membrane [GO:0005789]; integral component of endoplasmic reticulum membrane [GO:0030176]; integral component of membrane [GO:0016021]; membrane [GO:0016020]; nucleolus [GO:0005730]	FALSE	5	135.9	254000000	7453400	6555500	7678400	4157100	3824900	4806000	5795400	5582100	5309700	8081300	9948800	8710100	7229100	4.26267e+06	5562400	8913400					-0.76206	-15.9042	0.000397544	-0.378109	-7.80659	0.0151216	0.30216	-5.4378	0.0426923	0.383951	-7.4436	0.0509246	1.06422	-20.7892	2.36356e-05	0.680268	-14.2909	0.000972347	114.811
sp	Homo sapiens	O14494	PLPP1_HUMAN	PLPP1	Phospholipid phosphatase 1	apical plasma membrane [GO:0016324]; caveola [GO:0005901]; extracellular exosome [GO:0070062]; integral component of plasma membrane [GO:0005887]; membrane [GO:0016020]; membrane raft [GO:0045121]; plasma membrane [GO:0005886]	TRUE	2	57.1	88000000	2609400	2307500	2633700	3174900	3533400	3227000	2617800	2195000	2995400	2344000	2983300	3309800	2.51687e+06	3.31177e+06	2.60273e+06	2.87903e+06	0.102697	0.125556	1.31583		0.395972	-6.97504	0.0341838	0.0483987	-0.531582	0.776439	0.193956	-3.02898	0.179516	-0.347574	-5.87353	0.0908362	-0.202017	-2.66068	0.235381	0.145557	-2.09669	0.362362	92.2832
sp	Homo sapiens	O14495	PLPP3_HUMAN	PLPP3	Phospholipid phosphatase 3	adherens junction [GO:0005912]; basolateral plasma membrane [GO:0016323]; endoplasmic reticulum exit site [GO:0070971]; endoplasmic reticulum-Golgi intermediate compartment membrane [GO:0033116]; endoplasmic reticulum membrane [GO:0005789]; Golgi apparatus [GO:0005794]; Golgi membrane [GO:0000139]; integral component of membrane [GO:0016021]; integral component of plasma membrane [GO:0005887]; me…	TRUE	12	225.81	1610000000	31080000	25541000	27966000	29922000	29597000	30095000	22262000	20027000	22470000	19264000	24297000	19179000	2.81957e+07	2.98713e+07	2.15863e+07	2.09133e+07	0.00212841	0.00479431	1.42834		0.0832882	-0.9028	0.679636	-0.385355	-8.29125	0.0115574	-0.43105	-10.0338	0.00276643	-0.468643	-9.97983	0.0210265	-0.514339	-11.6535	0.0015574	-0.0456952	-0.938317	0.650633	123.619
sp	Homo sapiens	O14497	ARI1A_HUMAN	ARID1A	AT-rich interactive domain-containing protein 1A	brahma complex [GO:0035060]; nBAF complex [GO:0071565]; npBAF complex [GO:0071564]; nuclear chromatin [GO:0000790]; nucleoplasm [GO:0005654]; nucleus [GO:0005634]; SWI/SNF complex [GO:0016514]	FALSE	13	226.1	37500000	997560	1228200	1049100	1360000	1328400	1301600	1319900	1329100	1408400	1247800	1421100	1350000	1091620	1330000	1.35247e+06	1.33963e+06					0.284956	-7.03884	0.0332174	0.309122	-7.03884	0.0229258	0.295367	-8.02734	0.00902229	0.0241668	0	1	0.0104119	-0.471527	0.793469	-0.0137549	-0.471527	0.81961	78.0301
sp	Homo sapiens	O14524	NEMP1_HUMAN	NEMP1	Nuclear envelope integral membrane protein 1	integral component of membrane [GO:0016021]; nuclear envelope [GO:0005635]; nuclear inner membrane [GO:0005637]	FALSE	4	81.61	45100000	1247100	1156300	1286700	1207100	1353800	1390600	1508800	1367600	1350700	1171800	1218500	1181500	1.23003e+06	1.31717e+06	1.40903e+06	1190600					0.0987405	-1.64778	0.480062	0.196008	-4.50266	0.0923703	-0.0470086	-0.781479	0.653945	0.0972678	-1.9908	0.448501	-0.145749	-2.89961	0.204927	-0.243017	-6.01533	0.0464737	96.9217
sp	Homo sapiens	O14526	FCHO1_HUMAN	FCHO1	F-BAR domain only protein 1	clathrin-coated pit [GO:0005905]; cytoplasm [GO:0005737]; cytoskeleton [GO:0005856]; cytosol [GO:0005829]; nucleoplasm [GO:0005654]; plasma membrane [GO:0005886]	TRUE	1	31.81	2170000	173530	170080	157840	126240	94491	136780	128090	153130	146150	239010	324070	245710	167150	119170	142457	269597					-0.488118	-8.06423	0.0200807	-0.23062	-2.72032	0.245511	0.689659	-10.7272	0.00184244	0.257498	-3.96735	0.192452	1.17778	-18.5638	6.19745e-05	0.92028	-14.3901	0.00093036	99.3909
sp	Homo sapiens	O14529	CUX2_HUMAN	CUX2	Homeobox protein cut-like 2	extracellular exosome [GO:0070062]; Golgi membrane [GO:0000139]; nuclear chromatin [GO:0000790]; nucleus [GO:0005634]	TRUE	1	29.52	0	27273	33146	28909	29026	28410	28919	29940	21607	33259	24654	30375	26579	29776	28785	28268.7	27202.7					-0.0488327	-0.337321	0.872247	-0.0749461	-0.679137	0.72063	-0.130402	-1.06852	0.559225	-0.0261134	-0.28543	0.884663	-0.0815691	-0.619249	0.733616	-0.0554558	-0.28543	0.87291	95.6676
sp	Homo sapiens	O14530	TXND9_HUMAN	TXNDC9	Thioredoxin domain-containing protein 9	centrosome [GO:0005813]; cytosol [GO:0005829]; midbody [GO:0030496]; nucleus [GO:0005634]	FALSE	2	56.18	2280000	533090	455830	517240	356430	382520	423130	483790	466690	467500	563370	484340	488770	502053	387360	472660	512160					-0.374166	-9.22521	0.0114094	-0.0870379	-1.56063	0.457329	0.028754	-0.434991	0.793657	0.287128	-6.54725	0.0693932	0.40292	-10.1143	0.00351451	0.115792	-2.27844	0.328523	113.772
sp	Homo sapiens	O14531	DPYL4_HUMAN	DPYSL4	Dihydropyrimidinase-related protein 4	cytosol [GO:0005829]	FALSE	5	104.5	15900000	560570	555870	522680	586040	571450	504400	659240	598290	639550	628590	669660	546330	546373	553963	632360	614860					0.0199034	-0.0601808	0.978525	0.210859	-4.03656	0.119013	0.170371	-4.03656	0.0994203	0.190956	-3.90257	0.197193	0.150467	-3.90257	0.115472	-0.0404882	-4.03632e-14	1	95.5155
sp	Homo sapiens	O14545	TRAD1_HUMAN	TRAFD1	TRAF-type zinc finger domain-containing protein 1	mitochondrion [GO:0005739]	FALSE	3	77.95	7720000	248380	262870	195060	274570	361810	307020	340000	558340	528000	480350	477690	517280	235437	314467	475447	491773					0.417568	-5.2389	0.0842658	1.01394	-13.7503	0.000653537	1.06265	-15.0575	0.000155656	0.596376	-7.36456	0.0523661	0.645086	-8.93187	0.00681674	0.04871	-0.809923	0.691657	65.4871
sp	Homo sapiens	O14562	UBFD1_HUMAN	UBFD1	Ubiquitin domain-containing protein UBFD1	0	FALSE	2	71.13	4920000	517350	390470	365960	322210	334880	390400	512180	427330	392020	579030	581170	568600	424593	349163	443843	576267					-0.28218	-3.532	0.194633	0.0639688	-0.741783	0.696893	0.440655	-6.39093	0.0242638	0.346148	-4.93293	0.132436	0.722835	-11.3127	0.001848	0.376686	-4.93293	0.0836297	115.36
sp	Homo sapiens	O14578	CTRO_HUMAN	CIT	Citron Rho-interacting kinase	cytoplasm [GO:0005737]; cytoskeleton [GO:0005856]; cytosol [GO:0005829]; membrane [GO:0016020]	FALSE	34	276.35	105000000	6694200	9939500	4497400	4410000	5506400	7008100	5585700	4898300	5001700	4618400	5176900	4541600	7043700	5641500	5161900	4.77897e+06					-0.320255	-2.06612	0.391809	-0.448431	-3.07636	0.202176	-0.559635	-4.56203	0.0725211	-0.128177	-0.582428	0.808111	-0.23938	-1.62281	0.419089	-0.111203	-0.815113	0.689987	118.345
sp	Homo sapiens	O14579	COPE_HUMAN	COPE	Coatomer subunit epsilon	COPI vesicle coat [GO:0030126]; cytosol [GO:0005829]; endoplasmic reticulum membrane [GO:0005789]; Golgi apparatus [GO:0005794]; Golgi membrane [GO:0000139]; nucleoplasm [GO:0005654]; transport vesicle [GO:0030133]	FALSE	2	83.42	54600000	837550	895340	840880	756040	729970	930450	1054700	1025400	912610	1247100	1186300	1038200	857923	805487	997570	1157200					-0.090988	-1.88415	0.428578	0.217569	-3.73961	0.139825	0.431718	-9.53145	0.00371387	0.308557	-6.8057	0.0634727	0.522706	-12.4399	0.00105206	0.214148	-4.3132	0.114907	87.7434
sp	Homo sapiens	O14617	AP3D1_HUMAN	AP3D1	AP-3 complex subunit delta-1	AP-3 adaptor complex [GO:0030123]; axon cytoplasm [GO:1904115]; endosome membrane [GO:0010008]; glutamatergic synapse [GO:0098978]; Golgi apparatus [GO:0005794]; Golgi membrane [GO:0000139]; lysosomal membrane [GO:0005765]; membrane [GO:0016020]; postsynapse [GO:0098794]; presynaptic endosome [GO:0098830]; terminal bouton [GO:0043195]	FALSE	31	270.9	639000000	13527000	16921000	13980000	14765000	15298000	16774000	17326000	16439000	18070000	14245000	15704000	15296000	1.48093e+07	1.56123e+07	1.72783e+07	1.50817e+07					0.0761795	-1.5384	0.50526	0.222457	-4.79233	0.0787602	0.0262892	-0.908139	0.610138	0.146278	-2.35203	0.385308	-0.0498903	-0.437866	0.803543	-0.196168	-3.15355	0.209471	86.1844
sp	Homo sapiens	O14639	ABLM1_HUMAN	ABLIM1	Actin-binding LIM protein 1	actin cytoskeleton [GO:0015629]; cytoplasm [GO:0005737]; lamellipodium [GO:0030027]; stress fiber [GO:0001725]	FALSE	7	142.87	36300000	1993800	2221900	2091700	2199300	2215600	2022700	2167000	2573600	2346500	2563200	2485800	2801600	2.10247e+06	2.14587e+06	2.36237e+06	2.61687e+06					0.0294775	-0.502091	0.813459	0.16815	-3.15475	0.193542	0.315757	-6.63107	0.0209356	0.138672	-2.25451	0.401754	0.28628	-5.58537	0.0440164	0.147608	-2.25451	0.333106	86.428
sp	Homo sapiens	O14641	DVL2_HUMAN	DVL2	Segment polarity protein dishevelled homolog DVL-2	aggresome [GO:0016235]; apical part of cell [GO:0045177]; clathrin-coated endocytic vesicle [GO:0045334]; cytoplasm [GO:0005737]; cytoplasmic vesicle [GO:0031410]; cytosol [GO:0005829]; lateral plasma membrane [GO:0016328]; nuclear body [GO:0016604]; nucleoplasm [GO:0005654]; nucleus [GO:0005634]	TRUE	4	84.26	8090000	523140	486580	476460	411440	381020	458100	474950	407660	463350	412180	503920	366190	495393	416853	448653	427430	0.246694	0.275201	1.18841		-0.249035	-4.49291	0.121057	-0.142973	-2.40328	0.292493	-0.212886	-3.76418	0.116752	0.106061	-1.27552	0.603304	0.0361483	-0.354107	0.831226	-0.069913	-0.779942	0.702066	117.012
sp	Homo sapiens	O14646	CHD1_HUMAN	CHD1	Chromodomain-helicase-DNA-binding protein 1	cytoplasm [GO:0005737]; nucleoplasm [GO:0005654]; nucleus [GO:0005634]	FALSE	6	132.85	22900000	1238000	1348300	1248600	987140	835970	1121500	1145700	925760	1188400	804790	1163700	925430	1278300	981537	1086620	964640					-0.381112	-5.19817	0.0861235	-0.234379	-2.99127	0.211623	-0.406164	-5.77727	0.0350248	0.146733	-1.30203	0.59821	-0.0250515	-0.263511	0.870246	-0.171785	-1.72598	0.438234	114.866
sp	Homo sapiens	O14647	CHD2_HUMAN	CHD2	Chromodomain-helicase-DNA-binding protein 2	intracellular membrane-bounded organelle [GO:0043231]; nucleolus [GO:0005730]; nucleoplasm [GO:0005654]; nucleus [GO:0005634]	FALSE	12	204.12	28800000	1826500	1964700	2266100	2022400	2036800	2256100	2114500	1987900	2252300	1930800	2216800	1990100	2019100	2105100	2.11823e+06	2045900					0.0601764	-0.901563	0.679815	0.0691492	-0.901563	0.642528	0.0190233	-0.391521	0.812189	0.00897275	-3.89216e-14	1	-0.0411531	-0.418828	0.80891	-0.0501259	-0.418828	0.831045	88.148
sp	Homo sapiens	O14656	TOR1A_HUMAN	TOR1A	Torsin-1A	cytoplasmic vesicle membrane [GO:0030659]; cytoskeleton [GO:0005856]; cytosol [GO:0005829]; endoplasmic reticulum [GO:0005783]; endoplasmic reticulum lumen [GO:0005788]; extracellular exosome [GO:0070062]; extrinsic component of endoplasmic reticulum membrane [GO:0042406]; growth cone [GO:0030426]; intracellular membrane-bounded organelle [GO:0043231]; membrane [GO:0016020]; nuclear envelope [GO:…	TRUE	1	57.2	4640000	193260	487750	193610	195280	226570	282320	172750	264200	268390	348070	352180	311500	291540	234723	235113	337250					-0.312733	-0.971233	0.658143	-0.310337	-1.17398	0.559873	0.210125	-1.63052	0.406489	0.00239509	-0.134187	0.959676	0.522857	-3.15032	0.177402	0.520462	-3.43022	0.181851	70.3642
sp	Homo sapiens	O14657	TOR1B_HUMAN	TOR1B	Torsin-1B	endoplasmic reticulum [GO:0005783]; endoplasmic reticulum lumen [GO:0005788]; extracellular exosome [GO:0070062]; nuclear envelope [GO:0005635]; nuclear membrane [GO:0031965]	TRUE	3	120.68	16400000	513550	676400	474820	531660	613300	710220	734040	722230	733070	824670	670450	625760	554923	618393	729780	706960	0.11745	0.141882	1.3151		0.156236	-1.16853	0.601292	0.395173	-6.33822	0.0337377	0.34934	-5.69539	0.0367619	0.238937	-4.23002	0.17524	0.193104	-3.62326	0.135117	-0.045833	-0.29289	0.869851	78.7033
sp	Homo sapiens	O14662	STX16_HUMAN	STX16	Syntaxin-16	cytoplasm [GO:0005737]; cytosol [GO:0005829]; endomembrane system [GO:0012505]; focal adhesion [GO:0005925]; Golgi apparatus [GO:0005794]; Golgi cisterna [GO:0031985]; Golgi membrane [GO:0000139]; integral component of membrane [GO:0016021]; intracellular membrane-bounded organelle [GO:0043231]; membrane [GO:0016020]; perinuclear region of cytoplasm [GO:0048471]; SNARE complex [GO:0031201]; trans…	FALSE	2	59.62	5930000	132820	195290	124640	147140	158520	150720	176560	164220	213460	199270	217890	186630	150917	152127	184747	201263					0.0115209	-0.640609	0.764485	0.291796	-3.78813	0.136273	0.415332	-6.03525	0.0300089	0.280275	-2.62494	0.341703	0.403811	-4.75453	0.0707807	0.123536	-1.28034	0.549616	77.1029
sp	Homo sapiens	O14672	ADA10_HUMAN	ADAM10	Disintegrin and metalloproteinase domain-containing protein 10	adherens junction [GO:0005912]; axon [GO:0030424]; cell surface [GO:0009986]; clathrin-coated vesicle [GO:0030136]; cytoplasm [GO:0005737]; dendritic spine [GO:0043197]; endoplasmic reticulum lumen [GO:0005788]; extracellular exosome [GO:0070062]; focal adhesion [GO:0005925]; glutamatergic synapse [GO:0098978]; Golgi apparatus [GO:0005794]; Golgi-associated vesicle [GO:0005798]; Golgi membrane [G…	TRUE	18	201.39	4660000000	36081000	28124000	32416000	34157000	35266000	33086000	29679000	27301000	27390000	30461000	31715000	24687000	32207000	3.41697e+07	2.81233e+07	2.89543e+07	0.114228	0.13844	1.21499		0.0853419	-1.15674	0.604832	-0.195607	-3.83619	0.132703	-0.153595	-2.35461	0.267134	-0.280949	-5.90536	0.0899702	-0.238937	-4.26871	0.0938093	0.0420117	-0.862619	0.67576	116.905
sp	Homo sapiens	O14678	ABCD4_HUMAN	ABCD4	ATP-binding cassette sub-family D member 4	ATP-binding cassette (ABC) transporter complex [GO:0043190]; endoplasmic reticulum membrane [GO:0005789]; integral component of membrane [GO:0016021]; lysosomal membrane [GO:0005765]; peroxisomal membrane [GO:0005778]; peroxisome [GO:0005777]	FALSE	1	45.28	2200000	150560	142310	133720	140130	138900	163700	163520	123140	162560	160730	157190	167380	142197	147577	149740	161767					0.053577	-0.729134	0.734411	0.074572	-0.729134	0.701004	0.186027	-3.88952	0.108471	0.020995	0	1	0.13245	-2.58758	0.245451	0.111455	-2.58758	0.281236	100.16
sp	Homo sapiens	O14681	EI24_HUMAN	EI24	Etoposide-induced protein 2.4 homolog	cytosol [GO:0005829]; endoplasmic reticulum [GO:0005783]; endoplasmic reticulum membrane [GO:0005789]; Golgi apparatus [GO:0005794]; integral component of membrane [GO:0016021]; membrane [GO:0016020]; nuclear membrane [GO:0031965]	FALSE	1	37.78	68000000	136030	116920	124650	146220	137470	131800	172060	137020	149410	128750	148320	132250	125867	138497	152830	136440					0.137955	-2.55865	0.307527	0.280032	-5.7622	0.0462933	0.11637	-1.86714	0.355868	0.142077	-2.10299	0.429141	-0.0215846	-0.397838	0.817242	-0.163661	-2.81598	0.249737	98.2817
sp	Homo sapiens	O14683	P5I11_HUMAN	TP53I11	Tumor protein p53-inducible protein 11	integral component of membrane [GO:0016021]	TRUE	3	156.83	99800000	3800900	3330600	3299500	3726600	3713700	3870600	4412800	3840400	4343700	3260000	4071600	3738500	3477000	3770300	4.19897e+06	3.69003e+06	0.0962095	0.118208	1.20764		0.116836	-1.02157	0.64405	0.272191	-5.27264	0.0604709	0.0857908	-0.527644	0.754908	0.155355	-3.43549	0.240724	-0.0310455	-0.384181	0.821703	-0.1864	-4.2079	0.121148	100.445
sp	Homo sapiens	O14684	PTGES_HUMAN	PTGES	Prostaglandin E synthase	endoplasmic reticulum membrane [GO:0005789]; integral component of membrane [GO:0016021]; membrane [GO:0016020]; nuclear envelope lumen [GO:0005641]; perinuclear region of cytoplasm [GO:0048471]	FALSE	5	129.38	2020000000	21273000	16297000	20394000	24066000	23917000	22681000	22199000	22658000	22726000	19369000	20682000	24918000	1.93213e+07	2.35547e+07	2.25277e+07	2.16563e+07					0.285818	-4.97874	0.0953799	0.221503	-3.4903	0.160996	0.164594	-2.79199	0.206643	-0.064315	-0.797016	0.727023	-0.121224	-1.30491	0.503442	-0.0569089	-0.361317	0.847214	97.7395
sp	Homo sapiens	O14686	KMT2D_HUMAN	KMT2D	Histone-lysine N-methyltransferase 2D	histone methyltransferase complex [GO:0035097]; MLL3/4 complex [GO:0044666]; nucleoplasm [GO:0005654]; nucleus [GO:0005634]	FALSE	4	92.28	12900000	524110	663110	502960	558810	547720	536070	570390	548450	545080	625410	557280	639310	563393	547533	554640	607333					-0.0411957	-0.141518	0.944725	-0.0225908	-0.228154	0.897245	0.108346	-2.47255	0.249033	0.0186049	-0.389938	0.859266	0.149542	-2.74985	0.223348	0.130937	-2.0543	0.370658	92.2364
sp	Homo sapiens	O14727	APAF_HUMAN	APAF1	Apoptotic protease-activating factor 1	apoptosome [GO:0043293]; cytosol [GO:0005829]; extracellular exosome [GO:0070062]; extracellular region [GO:0005576]; ficolin-1-rich granule lumen [GO:1904813]; nucleus [GO:0005634]; protein-containing complex [GO:0032991]; secretory granule lumen [GO:0034774]	TRUE	4	93.34	6250000	671540	710940	643000	674210	655660	804190	836900	776500	873380	622340	739430	670010	675160	711353	828927	677260	0.0427991	0.0580547	1.22775		0.0753369	-0.725978	0.735343	0.296015	-6.12515	0.0380699	0.00448036	-0.154439	0.923499	0.220678	-4.69946	0.144996	-0.0708565	-0.942372	0.611709	-0.291535	-6.47861	0.0363505	92.86
sp	Homo sapiens	O14733	MP2K7_HUMAN	MAP2K7	Dual specificity mitogen-activated protein kinase kinase 7	cytoplasm [GO:0005737]; cytosol [GO:0005829]; nucleus [GO:0005634]	FALSE	2	55.23	11400000	1896300	1875200	1984000	1818800	1891100	1921000	1977600	2071500	1889300	1444900	1422100	1329100	1918500	1.87697e+06	1.97947e+06	1398700					-0.0315757	-0.186047	0.928384	0.045133	-0.30594	0.864173	-0.455892	-13.6772	0.00034324	0.0767087	-0.526552	0.827223	-0.424316	-13.3162	0.000666849	-0.501025	-14.2411	0.000979152	105.737
sp	Homo sapiens	O14734	ACOT8_HUMAN	ACOT8	Acyl-coenzyme A thioesterase 8	cytosol [GO:0005829]; peroxisomal matrix [GO:0005782]	FALSE	2	79.5	100000000	1315900	1277700	1468200	1149800	1429300	1269100	1653100	1597900	1319400	980660	907390	1098900	1.35393e+06	1.28273e+06	1.52347e+06	995650					-0.0779354	-1.12345	0.614678	0.170201	-2.38136	0.295619	-0.443446	-7.74865	0.0106859	0.248137	-4.25187	0.173608	-0.365511	-5.67585	0.0419069	-0.613647	-11.3582	0.00326974	102.091
sp	Homo sapiens	O14735	CDIPT_HUMAN	CDIPT	CDP-diacylglycerol--inositol 3-phosphatidyltransferase	endoplasmic reticulum membrane [GO:0005789]; Golgi apparatus [GO:0005794]; integral component of membrane [GO:0016021]; membrane [GO:0016020]; plasma membrane [GO:0005886]	TRUE	2	96.89	218000000	1655000	1552200	1327800	2097000	2004500	2321600	2562700	2311900	3291100	2209900	3211700	2536400	1.51167e+06	2.14103e+06	2721900	2.65267e+06	0.00454555	0.00873091	1.8006	4	0.502167	-6.34791	0.0476222	0.848474	-12.2215	0.00143133	0.811303	-11.7208	0.00103749	0.346307	-4.51801	0.154789	0.309136	-3.9878	0.109854	-0.0371707	-0.248978	0.889197	73.3334
sp	Homo sapiens	O14737	PDCD5_HUMAN	PDCD5	Programmed cell death protein 5	cytoplasm [GO:0005737]; cytosol [GO:0005829]; extracellular exosome [GO:0070062]; nucleus [GO:0005634]	TRUE	3	83.78	13200000	353470	456350	481830	443500	452390	576970	773630	644940	568160	672730	809400	619530	430550	490953	662243	700553	0.01148	0.0188376	1.62711	4	0.189405	-2.06662	0.391809	0.621181	-9.01931	0.0076656	0.702314	-10.1011	0.00266044	0.431776	-5.67699	0.0978361	0.512909	-6.7955	0.0222009	0.0811335	-0.541543	0.797623	61.8955
sp	Homo sapiens	O14744	ANM5_HUMAN	PRMT5	Protein arginine N-methyltransferase 5	cytoplasm [GO:0005737]; cytosol [GO:0005829]; Golgi apparatus [GO:0005794]; histone methyltransferase complex [GO:0035097]; methylosome [GO:0034709]; nucleoplasm [GO:0005654]; nucleus [GO:0005634]	FALSE	2	47.35	39900000	981420	1074600	1170400	936580	887790	1017400	1118700	1492700	1384300	2031100	1706200	1732300	1.07547e+06	947257	1331900	1823200					-0.183144	-2.45229	0.324515	0.308514	-4.60525	0.0872018	0.761501	-14.0922	0.000270553	0.491658	-8.41172	0.0360007	0.944646	-17.1033	0.000115585	0.452987	-8.41172	0.0137658	75.8171
sp	Homo sapiens	O14745	NHRF1_HUMAN	SLC9A3R1	Na(+)/H(+) exchange regulatory cofactor NHE-RF1	actin cytoskeleton [GO:0015629]; apical plasma membrane [GO:0016324]; brush border membrane [GO:0031526]; cell periphery [GO:0071944]; cytoplasm [GO:0005737]; endomembrane system [GO:0012505]; extracellular exosome [GO:0070062]; filopodium [GO:0030175]; membrane [GO:0016020]; membrane raft [GO:0045121]; microvillus [GO:0005902]; microvillus membrane [GO:0031528]; perinuclear region of cytoplasm […	TRUE	9	193.31	41700000	917040	1069500	928850	950570	1067600	1030200	1173700	1084500	1177000	2190700	2363800	2045800	971797	1.01612e+06	1.14507e+06	2200100	1.33893e-06	3.47188e-05	2.26395	5	0.0643491	-1.48466	0.518375	0.236705	-5.77337	0.0460265	1.17884	-25.9983	6.25224e-07	0.172356	-3.28002	0.257549	1.11449	-24.7216	5.5182e-06	0.942138	-22.1261	3.68622e-05	68.7812
sp	Homo sapiens	O14757	CHK1_HUMAN	CHEK1	Serine/threonine-protein kinase Chk1	centrosome [GO:0005813]; chromatin [GO:0000785]; condensed nuclear chromosome [GO:0000794]; cytoplasm [GO:0005737]; cytosol [GO:0005829]; extracellular space [GO:0005615]; intracellular membrane-bounded organelle [GO:0043231]; nucleoplasm [GO:0005654]; nucleus [GO:0005634]; protein-containing complex [GO:0032991]	TRUE	2	76.15	5040000	771400	747560	739110	318980	352750	355460	314760	305800	313590	289040	277460	262610	752690	342397	311383	276370	6.49357e-09	1.44807e-06	2.72349	1	-1.13639	-29.2012	5.77151e-07	-1.27336	-30.6035	1.45561e-07	-1.44545	-33.1255	2.97508e-08	-0.136977	-2.28029	0.397573	-0.309068	-9.24821	0.00569636	-0.172091	-5.64786	0.0567619	183.357
sp	Homo sapiens	O14763	TR10B_HUMAN	TNFRSF10B	Tumor necrosis factor receptor superfamily member 10B	cell surface [GO:0009986]; integral component of membrane [GO:0016021]; plasma membrane [GO:0005886]	TRUE	6	112.34	56000000	1752100	1429200	1544800	1286000	1287500	1273900	1188800	1030700	1002100	933480	1072100	929120	1.57537e+06	1.28247e+06	1.07387e+06	978233	0.000401533	0.00132263	1.61042	1	-0.296766	-6.09234	0.0542898	-0.552873	-13.0304	0.000936899	-0.687437	-16.7077	6.2015e-05	-0.256106	-5.66876	0.09809	-0.390671	-10.1538	0.00344035	-0.134564	-3.06811	0.218253	142.739
sp	Homo sapiens	O14772	FPGT_HUMAN	FPGT	Fucose-1-phosphate guanylyltransferase	cytoplasm [GO:0005737]; cytosol [GO:0005829]	FALSE	1	33.87	402000	207300	327810	196050	159170	176180	152370	221460	230820	216940	208610	213100	170700	243720	162573	223073	197470					-0.584134	-8.17428	0.0188749	-0.127707	-0.964781	0.621378	-0.303591	-3.18117	0.164017	0.456427	-6.34635	0.0744847	0.280543	-3.58226	0.137973	-0.175885	-1.66367	0.451249	100.286
sp	Homo sapiens	O14773	TPP1_HUMAN	TPP1	Tripeptidyl-peptidase 1	extracellular exosome [GO:0070062]; Golgi apparatus [GO:0005794]; lysosomal lumen [GO:0043202]; lysosome [GO:0005764]; melanosome [GO:0042470]; membrane raft [GO:0045121]; recycling endosome [GO:0055037]	TRUE	1	35.6	6710000	559800	461540	430830	526010	412280	463310	502190	393150	413090	514360	737650	401720	484057	467200	436143	551243					-0.0511357	-0.249681	0.903287	-0.150374	-1.0689	0.58858	0.187513	-1.28772	0.495257	-0.0992379	-0.722436	0.751672	0.238649	-1.68894	0.403855	0.337887	-2.86109	0.243552	115.503
sp	Homo sapiens	O14776	TCRG1_HUMAN	TCERG1	Transcription elongation regulator 1	nuclear speck [GO:0016607]; nucleoplasm [GO:0005654]; nucleus [GO:0005634]	FALSE	21	219.46	313000000	3504800	3325000	3736300	5250500	5149500	4849200	5250100	5113000	5690000	6918300	6978600	6170100	3.52203e+06	5.08307e+06	5.35103e+06	6689000					0.529291	-16.6248	0.000284328	0.603409	-18.3433	5.78522e-05	0.925382	-25.2893	8.51346e-07	0.0741184	-1.32658	0.593323	0.396091	-12.3891	0.00107888	0.321973	-10.2017	0.0056655	67.9056
sp	Homo sapiens	O14786	NRP1_HUMAN	NRP1	Neuropilin-1	axon [GO:0030424]; cell surface [GO:0009986]; cytoplasmic vesicle [GO:0031410]; cytosol [GO:0005829]; early endosome [GO:0005769]; extracellular space [GO:0005615]; focal adhesion [GO:0005925]; glutamatergic synapse [GO:0098978]; growth cone [GO:0030426]; integral component of membrane [GO:0016021]; mitochondrial membrane [GO:0031966]; neurofilament [GO:0005883]; neuronal cell body [GO:0043025]; …	TRUE	54	378.58	52800000000	373720000	335280000	355960000	268290000	279330000	261710000	230840000	201430000	221680000	204530000	239780000	204660000	3.54987e+08	2.69777e+08	2.17983e+08	2.16323e+08	4.47885e-05	0.000275147	1.641	1	-0.395999	-9.73086	0.00886949	-0.703547	-18.1666	6.37122e-05	-0.714576	-18.8677	1.97131e-05	-0.307548	-8.53616	0.0344073	-0.318576	-9.52731	0.00487618	-0.0110285	-0.484201	0.817385	141.15
sp	Homo sapiens	O14787	TNPO2_HUMAN	TNPO2	Transportin-2	cytoplasm [GO:0005737]; nucleus [GO:0005634]	FALSE	3	163.77	3250000	376360	433550	384810	420530	299510	380010	331970	590250	407620	430280	271160	512050	398240	366683	443280	404497					-0.119103	-0.778229	0.718571	0.15458	-0.468279	0.799511	0.0224897	-0.200231	0.901919	0.273684	-1.42697	0.56846	0.141593	-0.518532	0.776157	-0.13209	-0.722894	0.723581	93.349
sp	Homo sapiens	O14795	UN13B_HUMAN	UNC13B	Protein unc-13 homolog B	calyx of Held [GO:0044305]; cytosol [GO:0005829]; early phagosome [GO:0032009]; Golgi apparatus [GO:0005794]; membrane [GO:0016020]; neuromuscular junction [GO:0031594]; plasma membrane [GO:0005886]; presynaptic active zone [GO:0048786]; presynaptic active zone cytoplasmic component [GO:0098831]; presynaptic membrane [GO:0042734]; ribbon synapse [GO:0097470]; synaptic vesicle membrane [GO:0030672…	TRUE	9	162.23	31100000	1617100	1552800	1553900	1690800	1651100	1756500	1822900	1506700	1774600	1227300	1424400	1406100	1574600	1.69947e+06	1701400	1352600	0.0107925	0.0179607	1.25787		0.110097	-1.93648	0.418057	0.111737	-1.93648	0.376101	-0.21925	-5.74124	0.0357604	0.00164029	0	1	-0.329347	-8.92133	0.00685251	-0.330987	-8.92133	0.0107175	102.218
sp	Homo sapiens	O14802	RPC1_HUMAN	POLR3A	DNA-directed RNA polymerase III subunit RPC1	cytosol [GO:0005829]; membrane [GO:0016020]; nucleoplasm [GO:0005654]; RNA polymerase III complex [GO:0005666]	FALSE	6	128.98	16600000	1023700	1101100	1312200	982890	1111600	1135200	1111100	958610	1098100	797410	1032900	831610	1.14567e+06	1.07656e+06	1.05594e+06	887307					-0.0897542	-1.09995	0.621599	-0.117664	-1.09995	0.580967	-0.368683	-6.46778	0.02313	-0.0279099	0	1	-0.278928	-4.4531	0.0839027	-0.251019	-4.4531	0.106141	98.3034
sp	Homo sapiens	O14817	TSN4_HUMAN	TSPAN4	Tetraspanin-4	focal adhesion [GO:0005925]; integral component of plasma membrane [GO:0005887]; plasma membrane [GO:0005886]; vesicle [GO:0031982]	TRUE	7	109.49	392000000	11156000	9247700	9583500	7971200	7916100	7124000	5473000	5394400	5459400	6336900	5737000	6493400	9.99573e+06	7.67043e+06	5.44227e+06	6189100	2.14985e-05	0.000162514	1.83669	1	-0.382004	-10.717	0.00557742	-0.877105	-22.0779	8.13685e-06	-0.691583	-18.6401	2.20439e-05	-0.4951	-13.2606	0.00695069	-0.309578	-8.18487	0.0102423	0.185522	-3.88924	0.14272	152.313
sp	Homo sapiens	O14818	PSA7_HUMAN	PSMA7	Proteasome subunit alpha type-7	cytoplasm [GO:0005737]; cytosol [GO:0005829]; extracellular exosome [GO:0070062]; nucleoplasm [GO:0005654]; nucleus [GO:0005634]; postsynapse [GO:0098794]; proteasome complex [GO:0000502]; proteasome core complex [GO:0005839]; proteasome core complex, alpha-subunit complex [GO:0019773]	TRUE	6	145.72	96700000	4453000	4477300	4602500	3574100	3447400	4077900	4340800	4429200	3923500	5542600	5153100	5210200	4.51093e+06	3699800	4.23117e+06	5.30197e+06	0.000488429	0.00153192	1.43304		-0.285979	-6.35126	0.0475693	-0.0923704	-1.74456	0.416885	0.233102	-5.4691	0.0418001	0.193608	-3.48779	0.235765	0.51908	-13.0808	0.000755673	0.325472	-8.40669	0.0137913	100.384
sp	Homo sapiens	O14828	SCAM3_HUMAN	SCAMP3	Secretory carrier-associated membrane protein 3	extracellular exosome [GO:0070062]; Golgi apparatus [GO:0005794]; Golgi membrane [GO:0000139]; integral component of membrane [GO:0016021]; intracellular membrane-bounded organelle [GO:0043231]; recycling endosome membrane [GO:0055038]; trans-Golgi network membrane [GO:0032588]	TRUE	14	251.2	1210000000	13135000	11260000	12169000	11443000	11686000	11860000	12471000	9699600	11734000	9249100	13697000	9319800	12188000	11663000	1.13015e+07	10755300	0.646294	0.666621	1.13321		-0.0635225	-0.358387	0.86406	-0.108943	-0.698782	0.713323	-0.180414	-1.98709	0.331119	-0.0454204	-0.281569	0.885832	-0.116891	-1.40582	0.474398	-0.0714708	-0.985754	0.635614	114.447
sp	Homo sapiens	O14832	PAHX_HUMAN	PHYH	Phytanoyl-CoA dioxygenase peroxisomal	9+0 non-motile cilium [GO:0097731]; cytosol [GO:0005829]; mitochondrion [GO:0005739]; peroxisomal matrix [GO:0005782]; peroxisome [GO:0005777]	FALSE	1	43.14	1930000	519400	555670	475760	489500	536510	530820	345340	343950	305110	447550	470490	499410	516943	518943	331467	472483					0.00557087	-0.417684	0.841695	-0.641142	-17.8287	7.58764e-05	-0.129743	-3.60241	0.128821	-0.646713	-17.1849	0.00165518	-0.135314	-2.80299	0.217051	0.5114	-13.8403	0.00114621	112.923
sp	Homo sapiens	O14841	OPLA_HUMAN	OPLAH	5-oxoprolinase	cytosol [GO:0005829]	FALSE	8	155.06	17200000	689750	765950	691800	755160	776970	764840	789460	774020	833160	777520	752700	732850	715833	765657	798880	754357					0.0970739	-1.74072	0.459325	0.158355	-4.83805	0.0767998	0.0756231	-1.74072	0.381963	0.0612812	-2.16773	0.417513	-0.0214508	-5.18955e-14	1	-0.082732	-2.16773	0.349684	90.9143
sp	Homo sapiens	O14867	BACH1_HUMAN	BACH1	Transcription regulator protein BACH1	cytoplasm [GO:0005737]; nuclear chromatin [GO:0000790]; nucleus [GO:0005634]	FALSE	2	47.09	4230000	575310	595720	520210	614610	616710	697910	705840	522790	650600	493980	563730	506750	563747	643077	626410	521487					0.189944	-2.77106	0.278735	0.15206	-2.0904	0.34606	-0.112417	-1.28865	0.495029	-0.0378835	-0.379229	0.861562	-0.30236	-4.93214	0.0638374	-0.264477	-4.14379	0.125038	97.7288
sp	Homo sapiens	O14879	IFIT3_HUMAN	IFIT3	Interferon-induced protein with tetratricopeptide repeats 3	cytoplasm [GO:0005737]; cytosol [GO:0005829]; mitochondrion [GO:0005739]	FALSE	11	231.71	166000000	2309100	2242600	2208000	2464600	2257600	2406400	4387500	4137700	4645300	16092000	14770000	15998000	2.25323e+06	2376200	4.39017e+06	15620000					0.0766596	-1.43712	0.530817	0.962279	-26.4815	9.61921e-07	2.79333	-44.7474	7.23699e-11	0.885619	-25.2703	3.96099e-05	2.71667	-44.3086	1.47144e-10	1.83105	-37.1632	2.91897e-08	37.486
sp	Homo sapiens	O14880	MGST3_HUMAN	MGST3	Microsomal glutathione S-transferase 3	endoplasmic reticulum [GO:0005783]; endoplasmic reticulum membrane [GO:0005789]; integral component of membrane [GO:0016021]; intracellular membrane-bounded organelle [GO:0043231]; membrane [GO:0016020]; nuclear envelope [GO:0005635]	FALSE	1	50.95	240000000	1345900	1338100	1054100	1399900	1348000	1245500	1233600	1094600	1207300	1193800	1680800	1554100	1.24603e+06	1.33113e+06	1178500	1.47623e+06					0.0953124	-0.847071	0.696594	-0.0803909	-0.861388	0.655275	0.244578	-3.4374	0.141159	-0.175703	-2.02615	0.441555	0.149266	-2.02615	0.335867	0.324969	-5.0254	0.0796112	102.9
sp	Homo sapiens	O14907	TX1B3_HUMAN	TAX1BP3	Tax1-binding protein 3	actin cytoskeleton [GO:0015629]; cytoplasm [GO:0005737]; cytosol [GO:0005829]; extracellular exosome [GO:0070062]; fibrillar center [GO:0001650]; intracellular membrane-bounded organelle [GO:0043231]; plasma membrane [GO:0005886]	TRUE	2	91.52	51600000	1080000	1250500	1253400	1773600	1925400	1808100	2250000	2055000	2097300	2675600	2451200	2003800	1.19463e+06	1835700	2134100	2.37687e+06	7.79983e-05	0.000409262	1.98962	4	0.619762	-12.7006	0.0021202	0.83706	-16.3888	0.000162596	0.992493	-18.561	2.29464e-05	0.217297	-3.02759	0.286317	0.372731	-5.89465	0.0371006	0.155433	-1.78433	0.42509	57.2846
sp	Homo sapiens	O14908	GIPC1_HUMAN	GIPC1	PDZ domain-containing protein GIPC1	brush border [GO:0005903]; cell cortex [GO:0005938]; cytoplasm [GO:0005737]; cytoplasmic vesicle [GO:0031410]; cytosol [GO:0005829]; dendritic shaft [GO:0043198]; dendritic spine [GO:0043197]; endocytic vesicle [GO:0030139]; extracellular exosome [GO:0070062]; glutamatergic synapse [GO:0098978]; membrane [GO:0016020]; Schaffer collateral - CA1 synapse [GO:0098685]; synaptic vesicle [GO:0008021]; …	TRUE	10	204.7	142000000	2706700	2835700	2548300	3115600	3157600	2947600	3110100	3022500	3024500	4257900	3284100	3680300	2696900	3073600	3.05237e+06	3.74077e+06	0.00451189	0.0087017	1.38706		0.188627	-3.63742	0.184546	0.178626	-2.81332	0.233872	0.472032	-9.92859	0.00293727	-0.0100011	-0.431309	0.849574	0.283405	-4.81895	0.0681978	0.293406	-5.7221	0.0546918	86.1757
sp	Homo sapiens	O14920	IKKB_HUMAN	IKBKB	Inhibitor of nuclear factor kappa-B kinase subunit beta	CD40 receptor complex [GO:0035631]; cytoplasm [GO:0005737]; cytoplasmic side of plasma membrane [GO:0009898]; cytosol [GO:0005829]; IkappaB kinase complex [GO:0008385]; membrane raft [GO:0045121]; nucleus [GO:0005634]	TRUE	15	212.41	149000000	3031500	3426300	3190600	3087500	3065700	3718700	4061600	3403200	3722500	3248800	3462900	3319600	3.21613e+06	3.29063e+06	3729100	3.34377e+06	0.18102	0.20851	1.1595		0.0330381	-0.371444	0.860061	0.2135	-4.45436	0.0948995	0.056147	-0.865093	0.624381	0.180462	-3.69532	0.216434	0.0231089	-0.408533	0.813272	-0.157353	-2.90578	0.237351	89.2955
sp	Homo sapiens	O14925	TIM23_HUMAN	TIMM23	Mitochondrial import inner membrane translocase subunit Tim23	integral component of mitochondrial inner membrane [GO:0031305]; mitochondrial inner membrane [GO:0005743]; mitochondrial intermembrane space [GO:0005758]; mitochondrion [GO:0005739]; TIM23 mitochondrial import inner membrane translocase complex [GO:0005744]	FALSE	6	147.66	329000000	9412100	8391300	9699500	8346600	8551500	7142600	5341900	4975500	5079000	3610800	4662400	4158200	9.16763e+06	8.01357e+06	5.13213e+06	4143800					-0.194105	-3.49272	0.198986	-0.836991	-18.3007	5.89259e-05	-1.14559	-22.5091	3.03802e-06	-0.642886	-14.4973	0.00447163	-0.95149	-19.4329	4.25322e-05	-0.308604	-5.08415	0.077278	142.3
sp	Homo sapiens	O14929	HAT1_HUMAN	HAT1	Histone acetyltransferase type B catalytic subunit	cytoplasm [GO:0005737]; nuclear chromatin [GO:0000790]; nuclear chromosome, telomeric region [GO:0000784]; nuclear matrix [GO:0016363]; nucleoplasm [GO:0005654]; nucleus [GO:0005634]; protein-containing complex [GO:0032991]	FALSE	2	102.65	16400000	645350	518520	561070	486590	395950	506100	549340	490950	501100	353870	495380	387090	574980	462880	513797	412113					-0.312874	-4.96139	0.0961825	-0.162314	-1.95849	0.371575	-0.480471	-8.27674	0.0077872	0.150559	-2.04243	0.440074	-0.167597	-2.04243	0.332807	-0.318156	-5.0657	0.0778905	131.451
sp	Homo sapiens	O14933	UB2L6_HUMAN	UBE2L6	Ubiquitin/ISG15-conjugating enzyme E2 L6	cytosol [GO:0005829]; nucleoplasm [GO:0005654]; nucleus [GO:0005634]; ubiquitin ligase complex [GO:0000151]	FALSE	3	80.44	60200000	789400	767100	742550	833370	878770	961660	1087000	982570	1126500	2532800	3311800	2777000	766350	891267	1.06536e+06	2.87387e+06					0.217854	-3.82562	0.167658	0.475261	-10.3057	0.00392716	1.90692	-31.1199	6.39017e-08	0.257407	-5.00839	0.128774	1.68906	-29.0631	7.14528e-07	1.43166	-26.1813	5.71482e-06	56.4175
sp	Homo sapiens	O14936	CSKP_HUMAN	CASK	Peripheral plasma membrane protein CASK	actin cytoskeleton [GO:0015629]; basement membrane [GO:0005604]; basolateral plasma membrane [GO:0016323]; cell-cell junction [GO:0005911]; ciliary membrane [GO:0060170]; cytoplasm [GO:0005737]; cytosol [GO:0005829]; focal adhesion [GO:0005925]; nuclear lamina [GO:0005652]; nuclear matrix [GO:0016363]; nucleolus [GO:0005730]; plasma membrane [GO:0005886]; presynaptic membrane [GO:0042734]; Schaff…	TRUE	15	200.13	168000000	10816000	11352000	11133000	11691000	11540000	12536000	10989000	10174000	11626000	13891000	14925000	12948000	1.11003e+07	1.19223e+07	1.09297e+07	1.39213e+07	0.00245887	0.00536	1.27372		0.103064	-2.59219	0.303612	-0.0223536	-0.176211	0.920555	0.326694	-7.89122	0.00981415	-0.125417	-2.93924	0.298456	0.223631	-3.94411	0.11265	0.349048	-8.2887	0.0145318	90.3712
sp	Homo sapiens	O14939	PLD2_HUMAN	PLD2	Phospholipase D2	endoplasmic reticulum membrane [GO:0005789]; plasma membrane [GO:0005886]; presynapse [GO:0098793]	TRUE	11	199.28	46200000	2507400	2534000	3103000	3047000	2772800	2983700	3038900	2760800	3243600	2874500	3327600	2869600	2714800	2934500	3.01443e+06	3023900	0.426006	0.452163	1.11386		0.112269	-1.06872	0.630561	0.151041	-1.68644	0.429541	0.155565	-3.14007	0.168172	0.0387721	-0.411369	0.854315	0.0432957	-1.51145	0.446686	0.00452361	-0.916546	0.657681	85.8138
sp	Homo sapiens	O14949	QCR8_HUMAN	UQCRQ	Cytochrome b-c1 complex subunit 8	integral component of membrane [GO:0016021]; mitochondrial inner membrane [GO:0005743]; mitochondrial respiratory chain complex III [GO:0005750]; mitochondrion [GO:0005739]	FALSE	5	93.22	59300000	1811100	1471700	1724400	1626600	1605200	1545100	1487500	1492700	1443200	1344300	1573600	1298900	1.66907e+06	1592300	1.47447e+06	1405600					-0.0679294	-0.920149	0.67484	-0.178848	-3.07774	0.202036	-0.247855	-4.82772	0.0618941	-0.110919	-1.63008	0.52101	-0.179926	-3.16892	0.175559	-0.0690071	-0.984872	0.635752	117.959
sp	Homo sapiens	O14964	HGS_HUMAN	HGS	Hepatocyte growth factor-regulated tyrosine kinase substrate	cytosol [GO:0005829]; early endosome [GO:0005769]; early endosome membrane [GO:0031901]; endosome [GO:0005768]; ESCRT-0 complex [GO:0033565]; extracellular exosome [GO:0070062]; intracellular membrane-bounded organelle [GO:0043231]; lysosome [GO:0005764]; multivesicular body membrane [GO:0032585]	TRUE	17	220.48	644000000	16390000	16409000	17736000	23679000	21571000	21564000	22582000	25152000	22964000	30709000	27111000	28240000	16845000	2.22713e+07	23566000	2.86867e+07	2.02756e-05	0.000154845	1.70298	4	0.402868	-11.3645	0.00414988	0.484386	-13.2629	0.000828879	0.76806	-20.3592	8.94428e-06	0.081519	-1.15864	0.633728	0.365192	-10.0466	0.00364781	0.283673	-7.96934	0.0170921	71.753
sp	Homo sapiens	O14965	AURKA_HUMAN	AURKA	Aurora kinase A	axon hillock [GO:0043203]; centriole [GO:0005814]; centrosome [GO:0005813]; chromosome passenger complex [GO:0032133]; cilium [GO:0005929]; condensed nuclear chromosome, centromeric region [GO:0000780]; cytosol [GO:0005829]; germinal vesicle [GO:0042585]; meiotic spindle [GO:0072687]; microtubule [GO:0005874]; microtubule cytoskeleton [GO:0015630]; midbody [GO:0030496]; mitotic spindle pole [GO:0…	FALSE	2	80.72	2660000	634250	591020	602380	252890	284300	254970	302910	256470	222680	244620	224240	215140	609217	264053	260687	228000					-1.20613	-24.1842	6.59551e-06	-1.22464	-24.1842	2.76018e-06	-1.41792	-26.7	4.70531e-07	-0.0185126	-3.74801e-14	1	-0.211796	-3.60924	0.136189	-0.193283	-3.60924	0.16511	186.276
sp	Homo sapiens	O14966	RAB7L_HUMAN	RAB29	Ras-related protein Rab-7L1	cis-Golgi network [GO:0005801]; cytoplasm [GO:0005737]; cytoskeleton [GO:0005856]; cytosol [GO:0005829]; early endosome [GO:0005769]; endomembrane system [GO:0012505]; extracellular exosome [GO:0070062]; Golgi apparatus [GO:0005794]; intracellular vesicle [GO:0097708]; melanosome [GO:0042470]; mitochondrion [GO:0005739]; perinuclear region of cytoplasm [GO:0048471]; plasma membrane [GO:0005886]; …	TRUE	2	95.75	47400000	1218100	1119500	1280300	1594500	1450800	1462700	1618500	1543500	1521900	1292900	1389800	1309100	1.20597e+06	1.50267e+06	1561300	1330600	0.000788972	0.0022271	1.29465		0.317335	-9.70988	0.00892363	0.372558	-10.7825	0.0030304	0.141887	-3.09855	0.172166	0.0552228	-0.546518	0.820272	-0.175448	-5.17622	0.0554867	-0.230671	-6.29829	0.0400739	86.9989
sp	Homo sapiens	O14972	VP26C_HUMAN	VPS26C	Vacuolar protein sorting-associated protein 26C	endosome [GO:0005768]; nucleus [GO:0005634]	FALSE	1	68.52	6140000	278180	267960	307290	240070	329650	284490	399230	383320	307630	452130	353220	367500	284477	284737	363393	390950					0.00131796	-0.0898581	0.967065	0.353222	-4.82944	0.0771538	0.458674	-7.46794	0.012659	0.351904	-5.03494	0.127	0.457356	-7.67726	0.0136379	0.105452	-1.52536	0.483499	84.0704
sp	Homo sapiens	O14974	MYPT1_HUMAN	PPP1R12A	Protein phosphatase 1 regulatory subunit 12A	A band [GO:0031672]; actin cytoskeleton [GO:0015629]; centrosome [GO:0005813]; contractile fiber [GO:0043292]; cytoplasm [GO:0005737]; cytosol [GO:0005829]; focal adhesion [GO:0005925]; kinetochore [GO:0000776]; nucleolus [GO:0005730]; nucleoplasm [GO:0005654]; plasma membrane [GO:0005886]; PTW/PP1 phosphatase complex [GO:0072357]; Z disc [GO:0030018]	TRUE	11	150.04	30300000	2491900	2659900	2498700	2502800	2627500	2755700	2935800	3280400	2924600	4190100	3944900	3718000	2.55017e+06	2.62867e+06	3.04693e+06	3951000	3.16973e-05	0.000214848	1.54931	5	0.0437397	-0.914225	0.676555	0.256766	-6.83878	0.0255943	0.631626	-17.5885	3.85932e-05	0.213027	-5.09512	0.124067	0.587887	-16.2885	0.000165506	0.37486	-10.5814	0.00466002	81.8575
sp	Homo sapiens	O14975	S27A2_HUMAN	SLC27A2	Very long-chain acyl-CoA synthetase	cytosol [GO:0005829]; endoplasmic reticulum [GO:0005783]; endoplasmic reticulum lumen [GO:0005788]; endoplasmic reticulum membrane [GO:0005789]; extracellular exosome [GO:0070062]; integral component of endoplasmic reticulum membrane [GO:0030176]; integral component of peroxisomal membrane [GO:0005779]; peroxisomal membrane [GO:0005778]; plasma membrane [GO:0005886]; specific granule membrane [GO…	TRUE	15	210.24	393000000	8328800	7235900	7918200	8245400	8176300	9448700	11959000	10302000	10696000	11662000	10958000	12314000	7.82763e+06	8.62347e+06	1.09857e+07	1.16447e+07	0.000402624	0.00132426	1.48764		0.139692	-3.37793	0.209853	0.488974	-12.5431	0.00121136	0.573021	-14.9621	0.000165206	0.349283	-7.91845	0.0432356	0.433329	-10.689	0.00255696	0.0840469	-1.67697	0.448608	85.2456
sp	Homo sapiens	O14976	GAK_HUMAN	GAK	Cyclin-G-associated kinase	cytoplasm [GO:0005737]; cytosol [GO:0005829]; focal adhesion [GO:0005925]; Golgi apparatus [GO:0005794]; intracellular membrane-bounded organelle [GO:0043231]; membrane [GO:0016020]; perinuclear region of cytoplasm [GO:0048471]; presynapse [GO:0098793]; vesicle [GO:0031982]	FALSE	16	201.47	114000000	5747300	5775800	4953900	5687100	6007100	6665700	6776600	5927200	6552500	5212400	5388900	5118400	5.49233e+06	6.11997e+06	6.41877e+06	5239900					0.156105	-2.40612	0.331609	0.224877	-3.94573	0.125259	-0.0678799	-0.696345	0.686275	0.0687723	-0.89647	0.700316	-0.223985	-3.63629	0.134077	-0.292757	-5.29363	0.0690937	98.7892
sp	Homo sapiens	O14979	HNRDL_HUMAN	HNRNPDL	Heterogeneous nuclear ribonucleoprotein D-like	cytosol [GO:0005829]; nucleoplasm [GO:0005654]; nucleus [GO:0005634]; spliceosomal complex [GO:0005681]	FALSE	9	163.3	113000000	2153200	2452800	2151400	1983300	1854800	1774800	2075600	2188100	2058100	3769700	3140400	3365100	2.25247e+06	1.87097e+06	2.10727e+06	3.42507e+06					-0.267722	-5.81682	0.0624568	-0.0961329	-0.635901	0.73628	0.604626	-16.437	7.16314e-05	0.171589	-4.54977	0.152459	0.872348	-21.4451	1.86194e-05	0.700759	-17.3938	0.000306211	89.1985
sp	Homo sapiens	O14980	XPO1_HUMAN	XPO1	Exportin-1	annulate lamellae [GO:0005642]; Cajal body [GO:0015030]; cytoplasm [GO:0005737]; cytosol [GO:0005829]; host cell [GO:0043657]; intracellular membrane-bounded organelle [GO:0043231]; kinetochore [GO:0000776]; membrane [GO:0016020]; nuclear envelope [GO:0005635]; nuclear membrane [GO:0031965]; nucleolus [GO:0005730]; nucleoplasm [GO:0005654]; nucleus [GO:0005634]; protein-containing complex [GO:003…	FALSE	37	345.52	5050000000	110040000	91174000	103390000	146090000	150580000	153280000	182040000	160550000	166060000	100140000	110250000	119280000	1.01535e+08	1.49983e+08	169550000	109890000					0.56283	-15.53	0.000477254	0.739738	-19.244	3.57335e-05	0.114088	-2.30959	0.274493	0.176909	-3.5854	0.226114	-0.448742	-12.4614	0.00104143	-0.625651	-16.6498	0.000375659	82.8992
sp	Homo sapiens	O14981	BTAF1_HUMAN	BTAF1	TATA-binding protein-associated factor 172	intracellular membrane-bounded organelle [GO:0043231]; nucleoplasm [GO:0005654]	FALSE	29	278.06	199000000	14776000	14414000	14689000	18674000	19196000	21599000	22357000	18736000	22025000	11854000	14941000	13716000	1.46263e+07	19823000	2.10393e+07	1.35037e+07					0.438607	-11.3567	0.00415911	0.524521	-13.0113	0.000945913	-0.115217	-2.19192	0.294137	0.0859137	-0.974206	0.680064	-0.553824	-14.4283	0.000392072	-0.639738	-15.9067	0.000519297	85.6675
sp	Homo sapiens	O15013	ARHGA_HUMAN	ARHGEF10	Rho guanine nucleotide exchange factor 10	centrosome [GO:0005813]; cytosol [GO:0005829]	FALSE	9	142.21	42100000	2541200	2604700	2413100	1969600	2055500	2474100	2781200	2277100	2493300	1710400	1812900	1749900	2.51967e+06	2166400	2517200	1.75773e+06					-0.217933	-4.85578	0.101168	-0.00141304	-0.486648	0.792368	-0.519517	-12.6984	0.000595511	0.21652	-3.87723	0.199245	-0.301583	-6.53729	0.0257404	-0.518104	-11.7863	0.00270953	113.434
sp	Homo sapiens	O15014	ZN609_HUMAN	ZNF609	Zinc finger protein 609	nucleoplasm [GO:0005654]; nucleus [GO:0005634]	FALSE	9	171.13	18800000	1244500	1464100	1124400	1060800	1077000	1102300	1188300	1050900	1161600	904330	1142000	976470	1.27767e+06	1.08003e+06	1133600	1007600					-0.242436	-3.98662	0.156171	-0.1726	-2.52337	0.274107	-0.342588	-6.37959	0.0244133	0.0698358	-0.836811	0.715598	-0.100153	-1.37351	0.483437	-0.169989	-2.65078	0.272197	110.649
sp	Homo sapiens	O15018	PDZD2_HUMAN	PDZD2	PDZ domain-containing protein 2	cell-cell junction [GO:0005911]; cytoplasm [GO:0005737]; endoplasmic reticulum [GO:0005783]; extracellular region [GO:0005576]; nucleus [GO:0005634]	TRUE	1	28.81	25800000	767770	612390	468440	701550	597700	640940	878290	837180	852980	923220	664220	1351400	616200	646730	856150	979613					0.0697649	-0.509984	0.811444	0.474465	-4.11864	0.113504	0.668814	-5.62103	0.0383755	0.4047	-3.13602	0.273312	0.599049	-4.57736	0.0782117	0.194349	-0.784223	0.700776	99.1089
sp	Homo sapiens	O15027	SC16A_HUMAN	SEC16A	Protein transport protein Sec16A	cytosol [GO:0005829]; endoplasmic reticulum [GO:0005783]; endoplasmic reticulum exit site [GO:0070971]; endoplasmic reticulum membrane [GO:0005789]; ER to Golgi transport vesicle membrane [GO:0012507]; Golgi apparatus [GO:0005794]; Golgi membrane [GO:0000139]; organelle membrane [GO:0031090]; perinuclear region of cytoplasm [GO:0048471]	FALSE	45	312.94	1610000000	53311000	75059000	26255000	29240000	28323000	32852000	35879000	36636000	29860000	22530000	22653000	24144000	5.15417e+07	3.01383e+07	34125000	23109000					-0.77414	-4.43097	0.124638	-0.59491	-3.22349	0.185936	-1.15728	-8.5929	0.00644904	0.179229	-0.637901	0.784887	-0.383145	-2.76254	0.221964	-0.562374	-3.93389	0.139428	153.508
sp	Homo sapiens	O15031	PLXB2_HUMAN	PLXNB2	Plexin-B2	cell surface [GO:0009986]; extracellular exosome [GO:0070062]; integral component of plasma membrane [GO:0005887]; semaphorin receptor complex [GO:0002116]	TRUE	83	438.67	48300000000	334780000	322330000	322720000	406590000	406810000	396260000	346520000	303150000	372370000	279780000	331700000	289350000	326610000	403220000	340680000	3.00277e+08	0.0051552	0.00964438	1.34283		0.303998	-7.7454	0.0235098	0.0608483	-1.31586	0.521378	-0.121277	-2.289	0.277791	-0.24315	-5.39231	0.109753	-0.425275	-11.2521	0.00190639	-0.182125	-4.41583	0.108486	97.6899
sp	Homo sapiens	O15037	KHNYN_HUMAN	KHNYN	Protein KHNYN	cytoplasmic ribonucleoprotein granule [GO:0036464]; nucleus [GO:0005634]	FALSE	3	82.99	16200000	1578800	1586400	1571600	1194900	1109800	1347900	1201900	863810	1003200	785440	882330	730020	1.57893e+06	1.21753e+06	1022970	799263					-0.374989	-6.23101	0.0504515	-0.626186	-12.4089	0.00130722	-0.982207	-17.5725	3.8872e-05	-0.251197	-4.83551	0.136935	-0.607218	-11.1285	0.00202549	-0.356021	-4.83551	0.0873516	136.731
sp	Homo sapiens	O15040	TCPR2_HUMAN	TECPR2	Tectonin beta-propeller repeat-containing protein 2	cytoplasm [GO:0005737]	FALSE	1	39.78	836000	71702	74493	90781	66316	94468	93234	92454	90845	99478	83418	102970	100780	78992	84672.7	94259	95722.7					0.10019	-0.633681	0.767024	0.254924	-3.3555	0.172862	0.277154	-3.3555	0.147888	0.154734	-2.24328	0.403653	0.176964	-2.24328	0.297966	0.0222302	-2.59478e-14	1	81.1002
sp	Homo sapiens	O15042	SR140_HUMAN	U2SURP	U2 snRNP-associated SURP motif-containing protein	nucleoplasm [GO:0005654]; nucleus [GO:0005634]	FALSE	10	179.92	77600000	2728100	2911800	3044900	3624300	3561600	3353800	3692900	3352600	3735400	3406500	4169600	3956100	2.89493e+06	3.51323e+06	3.59363e+06	3.84407e+06					0.279269	-7.92993	0.0214796	0.311913	-7.92993	0.0140893	0.409103	-10.9154	0.00165827	0.0326438	0	1	0.129834	-1.85212	0.369083	0.0971901	-1.85212	0.412639	78.8134
sp	Homo sapiens	O15047	SET1A_HUMAN	SETD1A	Histone-lysine N-methyltransferase SETD1A	histone methyltransferase complex [GO:0035097]; nuclear chromatin [GO:0000790]; nuclear speck [GO:0016607]; nucleoplasm [GO:0005654]; nucleus [GO:0005634]; Set1C/COMPASS complex [GO:0048188]	FALSE	2	68.36	5150000	133770	117890	111930	113090	113640	116970	99322	115970	123520	95100	121410	105710	121197	114567	112937	107407					-0.0811627	-1.08913	0.624997	-0.101828	-1.66574	0.434148	-0.174266	-3.01087	0.181618	-0.0206649	-0.380912	0.861341	-0.0931038	-1.38525	0.479801	-0.0724389	-0.843609	0.681364	117.314
sp	Homo sapiens	O15050	TRNK1_HUMAN	TRANK1	TPR and ankyrin repeat-containing protein 1	0	FALSE	2	52.72	375000	222280	220290	225320	256980	238780	269810	368280	354060	401520	651580	774550	741800	222630	255190	374620	722643					0.196924	-3.9341	0.15962	0.75078	-18.0986	6.64071e-05	1.69864	-32.1238	4.15183e-08	0.553856	-13.8619	0.00585264	1.50171	-30.137	3.87906e-07	0.947856	-22.7877	3.05368e-05	56.4491
sp	Homo sapiens	O15056	SYNJ2_HUMAN	SYNJ2	Synaptojanin-2	cell projection [GO:0042995]; cytoskeleton [GO:0005856]; cytosol [GO:0005829]; membrane raft [GO:0045121]; perinuclear region of cytoplasm [GO:0048471]; plasma membrane [GO:0005886]; presynapse [GO:0098793]	TRUE	1	76.86	1390000	200280	233920	216790	155580	160020	166300	243840	198850	185970	232840	145270	219060	216997	160633	209553	199057					-0.433902	-5.86529	0.0610387	-0.0503554	-0.350049	0.846711	-0.124494	-1.78129	0.373454	0.383546	-5.11381	0.122958	0.309408	-3.00502	0.192694	-0.0741383	-1.23233	0.562162	101.893
sp	Homo sapiens	O15061	SYNEM_HUMAN	SYNM	Synemin	adherens junction [GO:0005912]; costamere [GO:0043034]; intermediate filament [GO:0005882]; intermediate filament cytoskeleton [GO:0045111]; neurofilament cytoskeleton [GO:0060053]; sarcolemma [GO:0042383]	FALSE	6	148.94	16100000	754940	1073600	754780	594890	492360	524580	509800	611510	542200	660970	608600	567900	861107	537277	554503	612490					-0.680527	-10.837	0.00527928	-0.634996	-10.2255	0.00412291	-0.491506	-7.69294	0.0110473	0.0455309	-0.294833	0.88202	0.189021	-1.97222	0.346295	0.14349	-1.48294	0.49457	117.712
sp	Homo sapiens	O15063	K0355_HUMAN	KIAA0355	Uncharacterized protein KIAA0355	P-body [GO:0000932]	FALSE	1	37.13	406000	11551	16673	13149	11651	13309	11720	13024	13225	18654	24530	16207	16152	13791	12226.7	14967.7	18963					-0.173696	-1.44162	0.52964	0.118122	-0.950821	0.625763	0.45946	-5.04268	0.0543848	0.291818	-2.89225	0.304425	0.633156	-7.56945	0.0144631	0.341338	-3.32324	0.191745	77.073
sp	Homo sapiens	O15066	KIF3B_HUMAN	KIF3B	Kinesin-like protein KIF3B	axon cytoplasm [GO:1904115]; centrosome [GO:0005813]; ciliary tip [GO:0097542]; cilium [GO:0005929]; cytosol [GO:0005829]; extracellular exosome [GO:0070062]; kinesin complex [GO:0005871]; kinesin II complex [GO:0016939]; membrane [GO:0016020]; microtubule [GO:0005874]; microtubule cytoskeleton [GO:0015630]; midbody [GO:0030496]; plus-end kinesin complex [GO:0005873]; spindle [GO:0005819]	TRUE	2	60.32	4140000	612460	784950	569010	588030	641700	727980	857020	734850	727580	788900	783730	705030	655473	652570	773150	759220	0.186948	0.214619	1.18478		-0.00640442	-0.385438	0.854279	0.238211	-4.18023	0.109602	0.211981	-3.52117	0.134901	0.244616	-3.40675	0.243589	0.218385	-2.78036	0.2196	-0.0262303	-0.321953	0.859215	86.2494
sp	Homo sapiens	O15067	PUR4_HUMAN	PFAS	Phosphoribosylformylglycinamidine synthase	cytosol [GO:0005829]; extracellular exosome [GO:0070062]	TRUE	8	148.44	62100000	2932600	2917400	2877100	1926600	1892800	2102200	2729900	2591200	2493600	2728800	2722200	2669800	2.90903e+06	1.97387e+06	2604900	2.70693e+06	6.31707e-06	8.18529e-05	1.47377		-0.559515	-16.7301	0.000271362	-0.159312	-5.12153	0.0657813	-0.10388	-2.9282	0.190675	0.400203	-11.102	0.015353	0.455635	-13.1936	0.000709269	0.0554314	-1.29765	0.544535	115.063
sp	Homo sapiens	O15078	CE290_HUMAN	CEP290	Centrosomal protein of 290 kDa	centriolar satellite [GO:0034451]; centriole [GO:0005814]; centrosome [GO:0005813]; ciliary basal body [GO:0036064]; ciliary transition zone [GO:0035869]; cytoplasm [GO:0005737]; cytosol [GO:0005829]; extracellular region [GO:0005576]; membrane [GO:0016020]; MKS complex [GO:0036038]; nucleus [GO:0005634]; photoreceptor connecting cilium [GO:0032391]; protein-containing complex [GO:0032991]; speci…	TRUE	2	69.11	3230000	712000	1008600	496800	273770	287630	356590	287740	242690	283360	298940	318730	295710	739133	305997	271263	304460	0.00110592	0.00291169	2.72478	1	-1.27232	-14.5642	0.000811908	-1.44614	-16.3844	0.000162596	-1.27958	-14.1833	0.000257405	-0.173822	-1.2776	0.603152	-0.00726324	-0.204153	0.899672	0.166559	-1.60695	0.464058	175.71
sp	Homo sapiens	O15084	ANR28_HUMAN	ANKRD28	Serine/threonine-protein phosphatase 6 regulatory ankyrin repeat subunit A	cytosol [GO:0005829]; Golgi membrane [GO:0000139]; nucleoplasm [GO:0005654]	FALSE	11	226.87	55400000	2189700	2480500	2286200	2314400	2249700	2611000	2624800	2334900	2774300	2333900	2693300	2309600	2318800	2391700	2578000	2445600					0.044658	-0.234314	0.909068	0.152874	-2.72253	0.245388	0.0768101	-1.30148	0.491016	0.108216	-2.28126	0.397427	0.032152	-0.953127	0.607906	-0.0760638	-0.953127	0.646219	89.9806
sp	Homo sapiens	O15085	ARHGB_HUMAN	ARHGEF11	Rho guanine nucleotide exchange factor 11	cytoplasm [GO:0005737]; cytosol [GO:0005829]; membrane [GO:0016020]	FALSE	8	136.57	22600000	1167200	1077300	1096800	1431600	1397600	1239400	1470400	1346700	1518300	1510400	1755100	1524700	1.11377e+06	1356200	1.44513e+06	1.59673e+06					0.284123	-5.02955	0.0932603	0.375756	-9.01203	0.00769004	0.519676	-11.8503	0.000966944	0.0916327	-2.60112	0.346367	0.235553	-5.41476	0.0487704	0.143921	-1.78984	0.424274	84.705
sp	Homo sapiens	O15091	MRPP3_HUMAN	PRORP	Mitochondrial ribonuclease P catalytic subunit	mitochondrial matrix [GO:0005759]; mitochondrial nucleoid [GO:0042645]; mitochondrial ribonuclease P complex [GO:0030678]; mitochondrion [GO:0005739]; nucleoplasm [GO:0005654]	FALSE	2	54.44	9010000	448050	481390	397350	448220	403490	436360	378660	377350	312070	302010	258430	386900	442263	429357	356027	315780					-0.042729	-0.564646	0.792412	-0.31292	-4.82577	0.0773239	-0.485986	-8.09338	0.00867838	-0.270191	-3.71544	0.215129	-0.443257	-6.93501	0.0205659	-0.173066	-2.00563	0.380543	116.118
sp	Homo sapiens	O15111	IKKA_HUMAN	CHUK	Inhibitor of nuclear factor kappa-B kinase subunit alpha	CD40 receptor complex [GO:0035631]; cytoplasm [GO:0005737]; cytoplasmic side of plasma membrane [GO:0009898]; cytosol [GO:0005829]; IkappaB kinase complex [GO:0008385]; intracellular membrane-bounded organelle [GO:0043231]; nucleoplasm [GO:0005654]	TRUE	9	197.26	82600000	3963000	4606400	4150200	4460800	4570100	5034200	6336500	6394900	5853700	5363700	4940200	5341900	4.23987e+06	4.68837e+06	6.19503e+06	5.21527e+06	0.000330541	0.00114814	1.46114		0.145067	-3.06386	0.242657	0.547093	-14.1329	0.000536712	0.298722	-6.84275	0.0183819	0.402027	-10.0632	0.0203856	0.153656	-2.51485	0.255426	-0.248371	-6.20964	0.0419756	77.9407
sp	Homo sapiens	O15117	FYB1_HUMAN	FYB1	FYN-binding protein 1	actin cytoskeleton [GO:0015629]; cell junction [GO:0030054]; cytosol [GO:0005829]; nucleus [GO:0005634]; plasma membrane [GO:0005886]; protein-containing complex [GO:0032991]	TRUE	1	32.42	610000	56944	65912	59521	64586	56733	61443	59449	53006	56317	53430	59588	58393	60792.3	60920.7	56257.3	57137					0.00304234	-0.0338321	0.988227	-0.111848	-1.78956	0.407186	-0.0894641	-1.78956	0.371765	-0.114891	-1.72841	0.499586	-0.0925064	-1.72841	0.394609	0.0223841	-4.32463e-14	1	96.8817
sp	Homo sapiens	O15118	NPC1_HUMAN	NPC1	NPC intracellular cholesterol transporter 1	endoplasmic reticulum [GO:0005783]; extracellular exosome [GO:0070062]; extracellular region [GO:0005576]; Golgi apparatus [GO:0005794]; integral component of lysosomal membrane [GO:1905103]; integral component of membrane [GO:0016021]; integral component of plasma membrane [GO:0005887]; late endosome membrane [GO:0031902]; lysosomal membrane [GO:0005765]; lysosome [GO:0005764]; membrane [GO:0016…	TRUE	12	217.79	495000000	7115400	6159600	7125900	8506800	8478700	8772600	9146500	8683300	8674900	8832200	14151000	10900000	6800300	8.58603e+06	8834900	11294400	0.010139	0.0170513	1.66087	4	0.336393	-4.41583	0.125375	0.377615	-4.41583	0.0968715	0.731937	-11.814	0.000987556	0.041222	-5.62201e-14	1	0.395544	-6.00219	0.0349407	0.354322	-6.00219	0.0468111	80.1382
sp	Homo sapiens	O15120	PLCB_HUMAN	AGPAT2	1-acyl-sn-glycerol-3-phosphate acyltransferase beta	endoplasmic reticulum [GO:0005783]; endoplasmic reticulum membrane [GO:0005789]; integral component of membrane [GO:0016021]; plasma membrane [GO:0005886]; specific granule membrane [GO:0035579]	TRUE	4	136.16	96800000	1779600	1511500	1719500	1795500	1933600	1937300	1910300	1761500	2033100	1363000	1677600	1460000	1670200	1888800	1.90163e+06	1500200	0.0184154	0.0280507	1.26759		0.177449	-3.29831	0.218207	0.187218	-3.29831	0.178083	-0.154866	-2.24794	0.284906	0.00976915	0	1	-0.332315	-6.78244	0.0223677	-0.342084	-6.78244	0.0309498	102.264
sp	Homo sapiens	O15126	SCAM1_HUMAN	SCAMP1	Secretory carrier-associated membrane protein 1	clathrin-coated vesicle [GO:0030136]; Golgi apparatus [GO:0005794]; Golgi membrane [GO:0000139]; integral component of membrane [GO:0016021]; plasma membrane [GO:0005886]; recycling endosome membrane [GO:0055038]; specific granule membrane [GO:0035579]; synaptic vesicle membrane [GO:0030672]; trans-Golgi network [GO:0005802]; trans-Golgi network membrane [GO:0032588]; zymogen granule membrane [GO…	TRUE	5	170.58	337000000	3817700	4836400	3747300	4221400	3955600	3917200	4414800	4324600	4450500	5058700	5649500	5148300	4133800	4031400	4.39663e+06	5285500	0.012	0.0195044	1.31108		-0.0361877	-0.449615	0.829379	0.0889306	-1.52567	0.467072	0.354571	-8.24909	0.0079111	0.125118	-2.26184	0.40067	0.390759	-9.1825	0.00590421	0.265641	-5.60316	0.058084	85.5635
sp	Homo sapiens	O15127	SCAM2_HUMAN	SCAMP2	Secretory carrier-associated membrane protein 2	extracellular exosome [GO:0070062]; Golgi apparatus [GO:0005794]; Golgi membrane [GO:0000139]; integral component of membrane [GO:0016021]; intracellular membrane-bounded organelle [GO:0043231]; recycling endosome membrane [GO:0055038]; trans-Golgi network membrane [GO:0032588]; transport vesicle [GO:0030133]	TRUE	5	181.38	93100000	1496000	1521600	1831900	1594700	1602500	1705300	2139300	1708300	2009800	2397800	2858600	2457200	1616500	1.63417e+06	1.95247e+06	2571200	0.0011039	0.00291169	1.5906	5	0.0156816	-0.238434	0.907357	0.272424	-4.87354	0.0752689	0.669568	-14.444	0.00022215	0.256743	-4.35719	0.166377	0.653887	-14.0008	0.000474102	0.397144	-8.55771	0.0127367	76.9712
sp	Homo sapiens	O15143	ARC1B_HUMAN	ARPC1B	Actin-related protein 2/3 complex subunit 1B	actin cytoskeleton [GO:0015629]; Arp2/3 protein complex [GO:0005885]; cytosol [GO:0005829]; extracellular exosome [GO:0070062]; focal adhesion [GO:0005925]; nucleus [GO:0005634]; tubulobulbar complex [GO:0036284]	TRUE	6	174.09	70200000	1614100	1781900	1675700	1430200	1618400	1627000	1724200	1723500	1655100	1981400	1838000	1999900	1.69057e+06	1.55853e+06	1.70093e+06	1.93977e+06	0.0052696	0.00978452	1.24461		-0.117318	-3.59222	0.188597	0.00881969	-0.169226	0.922452	0.198376	-4.31944	0.083699	0.126138	-3.95247	0.19381	0.315694	-9.38401	0.00529332	0.189557	-3.95247	0.138427	93.7095
sp	Homo sapiens	O15144	ARPC2_HUMAN	ARPC2	Actin-related protein 2/3 complex subunit 2	actin cytoskeleton [GO:0015629]; Arp2/3 protein complex [GO:0005885]; cytosol [GO:0005829]; endosome [GO:0005768]; extracellular exosome [GO:0070062]; focal adhesion [GO:0005925]; lamellipodium [GO:0030027]; muscle cell projection membrane [GO:0036195]; neuron projection [GO:0043005]; nucleus [GO:0005634]; site of double-strand break [GO:0035861]; synapse [GO:0045202]	TRUE	3	110.88	20000000	663130	674310	723810	675560	844900	953430	1120700	1091600	1050000	1748600	1349400	1503400	687083	824630	1.08743e+06	1533800	0.000121343	0.000557941	2.23233	4	0.263262	-4.59316	0.115051	0.66237	-13.0879	0.000912552	1.15855	-20.7076	7.45309e-06	0.399108	-7.25285	0.05451	0.895292	-16.4644	0.000152502	0.496183	-8.71772	0.0118062	64.1799
sp	Homo sapiens	O15162	PLS1_HUMAN	PLSCR1	Phospholipid scramblase 1	collagen-containing extracellular matrix [GO:0062023]; cytoplasm [GO:0005737]; cytosol [GO:0005829]; extracellular exosome [GO:0070062]; Golgi apparatus [GO:0005794]; integral component of plasma membrane [GO:0005887]; membrane [GO:0016020]; membrane raft [GO:0045121]; nucleolus [GO:0005730]; nucleoplasm [GO:0005654]; nucleus [GO:0005634]; perinuclear region of cytoplasm [GO:0048471]; plasma memb…	TRUE	3	108.46	247000000	3117800	2981600	3025100	4284000	4042200	4854700	7011200	6748500	7510900	13473000	15977000	13611000	3041500	4.39363e+06	7090200	1.43537e+07	2.96871e-08	4.19489e-06	4.71927	5	0.530631	-12.4901	0.00232675	1.22104	-25.7329	1.41946e-06	2.23856	-36.4072	5.02569e-09	0.690412	-17.2157	0.00165518	1.70793	-32.0204	1.47195e-07	1.01752	-23.3017	2.69618e-05	43.1843
sp	Homo sapiens	O15164	TIF1A_HUMAN	TRIM24	Transcription intermediary factor 1-alpha	cytosol [GO:0005829]; nuclear euchromatin [GO:0005719]; nucleoplasm [GO:0005654]; nucleus [GO:0005634]; perichromatin fibrils [GO:0005726]	FALSE	2	54.77	4200000	489450	488290	429050	449840	409260	415750	415700	362290	426550	403080	514990	443900	468930	424950	401513	453990					-0.142079	-1.95717	0.414069	-0.223925	-3.33802	0.174535	-0.0467121	-0.365926	0.823217	-0.0818452	-0.833881	0.716583	0.0953674	-1.36846	0.484851	0.177213	-2.64055	0.273653	111.914
sp	Homo sapiens	O15173	PGRC2_HUMAN	PGRMC2	Membrane-associated progesterone receptor component 2	endomembrane system [GO:0012505]; endoplasmic reticulum [GO:0005783]; integral component of membrane [GO:0016021]; membrane [GO:0016020]; nuclear envelope [GO:0005635]	FALSE	6	177.19	83200000	1952600	1725600	2006400	2358300	2235000	2014500	2579000	2649700	2422600	2980400	3052000	2703200	1.89487e+06	2202600	2.55043e+06	2.91187e+06					0.217111	-5.04463	0.092731	0.428646	-10.7879	0.00302231	0.619848	-15.8068	0.000102909	0.211535	-4.27528	0.172736	0.402737	-10.038	0.00366524	0.191202	-4.27528	0.117172	81.7007
sp	Homo sapiens	O15213	WDR46_HUMAN	WDR46	WD repeat-containing protein 46	nucleolus [GO:0005730]; nucleoplasm [GO:0005654]; small-subunit processome [GO:0032040]	FALSE	4	104.98	9520000	760810	714380	761990	516900	540940	520340	586770	652840	686600	689410	783310	788580	745727	526060	642070	753767					-0.50342	-13.78	0.0012014	-0.215916	-4.40629	0.0974197	0.0154711	-0.871511	0.622271	0.287503	-8.24863	0.0382439	0.518891	-15.1663	0.000273052	0.231387	-6.06267	0.0452707	114.081
sp	Homo sapiens	O15226	NKRF_HUMAN	NKRF	NF-kappa-B-repressing factor	nucleolus [GO:0005730]; nucleoplasm [GO:0005654]; nucleus [GO:0005634]	FALSE	13	201.89	204000000	6084800	7006100	6568300	5697800	5775200	6098300	6129500	7821600	7047800	6452000	6209900	6600600	6.55307e+06	5857100	6.99963e+06	6.42083e+06					-0.161984	-2.45178	0.324515	0.0951091	-1.2495	0.538832	-0.0294097	-0.232755	0.886686	0.257093	-4.51244	0.155044	0.132574	-2.89856	0.204958	-0.124519	-0.907665	0.660591	94.2261
sp	Homo sapiens	O15228	GNPAT_HUMAN	GNPAT	Dihydroxyacetone phosphate acyltransferase	cytosol [GO:0005829]; membrane [GO:0016020]; mitochondrial membrane [GO:0031966]; peroxisomal matrix [GO:0005782]; peroxisomal membrane [GO:0005778]; peroxisome [GO:0005777]	FALSE	7	128.1	74100000	2992400	2894000	2754900	2988200	2945300	3482500	3075600	3075600	3150400	2825400	2840000	2795900	2.88043e+06	3.13867e+06	3.10053e+06	2.82043e+06					0.123866	-2.54569	0.309428	0.106231	-3.58979	0.15194	-0.030369	-1.03189	0.570004	-0.0176354	-0.572599	0.81275	-0.154235	-4.30599	0.0917004	-0.1366	-5.45428	0.0630111	100.247
sp	Homo sapiens	O15230	LAMA5_HUMAN	LAMA5	Laminin subunit alpha-5	basement membrane [GO:0005604]; collagen-containing extracellular matrix [GO:0062023]; extracellular exosome [GO:0070062]; extracellular region [GO:0005576]; extracellular space [GO:0005615]; laminin-10 complex [GO:0043259]; laminin-11 complex [GO:0043260]; laminin-5 complex [GO:0005610]; neuromuscular junction [GO:0031594]; nucleus [GO:0005634]; synaptic cleft [GO:0043083]	TRUE	37	268.79	620000000	33576000	36873000	34228000	21359000	20903000	23954000	18047000	15554000	17725000	15444000	18925000	15361000	3.48923e+07	22072000	1.71087e+07	1.65767e+07	1.57043e-05	0.000139525	2.10491	1	-0.660693	-15.2141	0.000571288	-1.02818	-21.2317	1.27641e-05	-1.07376	-21.7488	4.42704e-06	-0.36749	-7.03226	0.0592334	-0.413063	-7.894	0.0120557	-0.0455734	-0.404065	0.835002	148.157
sp	Homo sapiens	O15231	ZN185_HUMAN	ZNF185	Zinc finger protein 185	actin cytoskeleton [GO:0015629]; cytoplasm [GO:0005737]; focal adhesion [GO:0005925]	FALSE	27	257.5	409000000	8552000	9433400	9082800	9156200	9437200	9978300	11502000	10863000	11979000	9771800	11452000	9701300	9.02273e+06	9523900	11448000	1.03084e+07					0.0779879	-2.07721	0.390339	0.343459	-9.88856	0.00487362	0.192179	-3.86562	0.110106	0.265471	-6.55978	0.0691078	0.114191	-1.10076	0.561871	-0.15128	-4.54071	0.10159	84.8771
sp	Homo sapiens	O15234	CASC3_HUMAN	CASC3	Protein CASC3	cytoplasmic stress granule [GO:0010494]; cytosol [GO:0005829]; dendrite [GO:0030425]; exon-exon junction complex [GO:0035145]; nuclear membrane [GO:0031965]; nuclear speck [GO:0016607]; nucleoplasm [GO:0005654]; nucleus [GO:0005634]; perinuclear region of cytoplasm [GO:0048471]; U2-type catalytic step 1 spliceosome [GO:0071006]	FALSE	3	113.74	6010000	230570	273540	245000	232620	229640	251010	282200	340180	297560	533270	371810	384020	249703	237757	306647	429700					-0.0707293	-0.971175	0.658143	0.296362	-5.01782	0.0696396	0.783115	-14.3118	0.000239739	0.367091	-6.85007	0.0622307	0.853844	-15.7934	0.000207167	0.486753	-8.25441	0.0148015	75.3616
sp	Homo sapiens	O15235	RT12_HUMAN	MRPS12	28S ribosomal protein S12 mitochondrial	mitochondrial inner membrane [GO:0005743]; mitochondrial ribosome [GO:0005761]; mitochondrial small ribosomal subunit [GO:0005763]; ribosome [GO:0005840]	FALSE	2	70.64	6160000	593410	651020	706940	539920	545210	641570	517840	486760	557040	350650	516430	375520	650457	575567	520547	414200					-0.17647	-1.99989	0.405958	-0.321425	-4.26389	0.104923	-0.651125	-11.1455	0.00145456	-0.144956	-1.4577	0.561487	-0.474655	-7.98762	0.0114406	-0.3297	-5.43491	0.0636706	109.852
sp	Homo sapiens	O15240	VGF_HUMAN	VGF	Neurosecretory protein VGF	cytoplasmic vesicle [GO:0031410]; endoplasmic reticulum lumen [GO:0005788]; extracellular space [GO:0005615]; Golgi apparatus [GO:0005794]; intracellular membrane-bounded organelle [GO:0043231]; transport vesicle [GO:0030133]	TRUE	1	41.31	2230000	67124	74069	64297	167820	146950	130380	156510	138160	131180	130540	161630	142420	68496.7	148383	141950	144863					1.11522	-20.8399	3.16325e-05	1.05128	-19.8945	2.60027e-05	1.08059	-19.8945	1.15415e-05	-0.0639462	-0.756743	0.739587	-0.0346366	-0.756743	0.676077	0.0293096	-3.31555e-14	1	53.3055
sp	Homo sapiens	O15258	RER1_HUMAN	RER1	Protein RER1	cell surface [GO:0009986]; endoplasmic reticulum [GO:0005783]; endoplasmic reticulum-Golgi intermediate compartment [GO:0005793]; Golgi apparatus [GO:0005794]; integral component of Golgi membrane [GO:0030173]; plasma membrane [GO:0005886]	TRUE	6	132.08	185000000	6319600	5551500	6344100	5939500	6204500	6545800	5946000	5515500	5854200	4977800	6392800	6541600	6.07173e+06	6.22993e+06	5771900	5.97073e+06	0.76696	0.778126	1.07936		0.0371083	-0.364943	0.862	-0.0730621	-0.873075	0.652041	-0.0242003	-0.873075	0.621818	-0.11017	-1.39703	0.574628	-0.0613086	-1.39703	0.476699	0.0488618	0	1	105.133
sp	Homo sapiens	O15260	SURF4_HUMAN	SURF4	Surfeit locus protein 4	azurophil granule membrane [GO:0035577]; cytosol [GO:0005829]; endoplasmic reticulum-Golgi intermediate compartment [GO:0005793]; endoplasmic reticulum-Golgi intermediate compartment membrane [GO:0033116]; endoplasmic reticulum membrane [GO:0005789]; Golgi membrane [GO:0000139]; integral component of membrane [GO:0016021]; plasma membrane [GO:0005886]; transport vesicle [GO:0030133]	TRUE	9	203.63	1720000000	39408000	34687000	40231000	49410000	46550000	53035000	52025000	46348000	51997000	32113000	40187000	38801000	3.81087e+07	49665000	5.01233e+07	3.70337e+07	0.00321179	0.00662562	1.35345		0.38211	-8.70649	0.014787	0.395363	-7.89137	0.0143953	-0.0412817	-0.596882	0.724824	0.0132528	-0.383703	0.860646	-0.423392	-9.89068	0.00397565	-0.436645	-9.09311	0.00981252	90.1111
sp	Homo sapiens	O15269	SPTC1_HUMAN	SPTLC1	Serine palmitoyltransferase 1	endoplasmic reticulum [GO:0005783]; endoplasmic reticulum membrane [GO:0005789]; integral component of membrane [GO:0016021]; serine C-palmitoyltransferase complex [GO:0017059]; SPOTS complex [GO:0035339]	FALSE	16	249.71	335000000	9740000	9494500	9420700	9297300	9468400	10392000	10360000	10293000	10496000	7467100	8203200	7879300	9.55173e+06	9.71923e+06	10383000	7.84987e+06					0.02508	-0.103964	0.961293	0.120389	-2.29287	0.310436	-0.283094	-8.34471	0.00748522	0.0953089	-2.09671	0.43027	-0.308174	-8.58323	0.0082436	-0.403483	-11.8096	0.00268621	103.883
sp	Homo sapiens	O15270	SPTC2_HUMAN	SPTLC2	Serine palmitoyltransferase 2	cytoplasm [GO:0005737]; endoplasmic reticulum membrane [GO:0005789]; integral component of membrane [GO:0016021]; serine C-palmitoyltransferase complex [GO:0017059]	FALSE	12	170.59	77100000	3272700	3176800	3020000	3005500	3102200	3142500	3140500	2792600	3052300	2222800	2495100	2681200	3156500	3083400	2.99513e+06	2.46637e+06					-0.0338037	-0.0034967	0.998514	-0.0757055	-1.04292	0.596746	-0.355938	-7.21327	0.0146772	-0.0419018	-1.0484	0.661173	-0.322135	-7.22168	0.0176061	-0.280233	-5.2656	0.0699169	111.874
sp	Homo sapiens	O15287	FANCG_HUMAN	FANCG	Fanconi anemia group G protein	cytosol [GO:0005829]; Fanconi anaemia nuclear complex [GO:0043240]; mitochondrion [GO:0005739]; nucleolus [GO:0005730]; nucleoplasm [GO:0005654]; plasma membrane [GO:0005886]	TRUE	2	88.03	5140000	697390	701770	700640	634100	687480	685990	746910	526620	609300	442440	515630	508070	699933	669190	627610	488713	0.00938884	0.016007	1.4322		-0.0648016	-0.45656	0.826271	-0.157349	-2.72842	0.244755	-0.518229	-9.70125	0.00336057	-0.0925475	-1.93464	0.460036	-0.453427	-8.76417	0.00750505	-0.36088	-5.58429	0.0586735	112.236
sp	Homo sapiens	O15294	OGT1_HUMAN	OGT	UDP-N-acetylglucosamine--peptide N-acetylglucosaminyltransferase 110 kDa subunit	cell projection [GO:0042995]; cytosol [GO:0005829]; histone acetyltransferase complex [GO:0000123]; mitochondrial membrane [GO:0031966]; nucleoplasm [GO:0005654]; nucleus [GO:0005634]; plasma membrane [GO:0005886]; protein-containing complex [GO:0032991]; protein N-acetylglucosaminyltransferase complex [GO:0017122]	TRUE	10	170.16	105000000	3276700	3896000	3431400	3206600	3492200	3488300	3620800	4014900	3695300	3354600	3233100	3468000	3534700	3395700	3777000	3351900	0.150239	0.176789	1.12682		-0.0578788	-1.07237	0.629469	0.095653	-1.9105	0.381395	-0.0766087	-1.07237	0.558043	0.153532	-3.62823	0.223126	-0.0187299	0	1	-0.172262	-3.62823	0.163579	93.2251
sp	Homo sapiens	O15305	PMM2_HUMAN	PMM2	Phosphomannomutase 2	cytosol [GO:0005829]; neuronal cell body [GO:0043025]; nucleoplasm [GO:0005654]	FALSE	3	96.13	65100000	4274900	4255700	4391500	4129200	4100400	4534100	6171900	5567700	5841200	7695900	7184300	6645000	4.30737e+06	4.25457e+06	5.86027e+06	7.17507e+06					-0.0177939	-0.0971455	0.964204	0.44416	-12.9638	0.00097519	0.736186	-20.2312	9.52383e-06	0.461954	-13.1607	0.00711696	0.75398	-20.3749	2.91094e-05	0.292026	-8.11126	0.0159039	79.1748
sp	Homo sapiens	O15321	TM9S1_HUMAN	TM9SF1	Transmembrane 9 superfamily member 1	autophagosome membrane [GO:0000421]; cytoplasmic vesicle [GO:0031410]; integral component of membrane [GO:0016021]; lysosomal membrane [GO:0005765]; membrane [GO:0016020]	FALSE	8	170.26	276000000	4095700	4879700	4065700	5317300	5511200	5068300	6588500	5816200	6622900	5075000	7601100	6546400	4.34703e+06	5.29893e+06	6.34253e+06	6407500					0.285671	-3.8137	0.168387	0.545028	-9.88206	0.00488153	0.55973	-9.21942	0.00444301	0.259357	-4.58775	0.150396	0.27406	-3.93197	0.113479	0.0147024	-0.313388	0.862507	73.1506
sp	Homo sapiens	O15327	INP4B_HUMAN	INPP4B	Inositol polyphosphate 4-phosphatase type II	cytoplasm [GO:0005737]; cytosol [GO:0005829]	FALSE	6	114.03	30100000	1619400	1431300	1712300	1440400	1679600	1822600	1710700	1606200	1700900	1756900	1726100	1477800	1.58767e+06	1.64753e+06	1672600	1653600					0.0533996	-1.23827	0.581997	0.0751844	-1.23827	0.541635	0.0587022	-0.672453	0.695684	0.0217848	0	1	0.00530264	-0.420059	0.808609	-0.0164822	-0.420059	0.831025	98.7228
sp	Homo sapiens	O15344	TRI18_HUMAN	MID1	E3 ubiquitin-protein ligase Midline-1	cytosol [GO:0005829]; microtubule [GO:0005874]; microtubule associated complex [GO:0005875]; spindle [GO:0005819]	FALSE	17	200.75	452000000	15711000	20243000	14123000	11347000	12221000	15180000	15450000	14936000	15399000	16252000	15380000	15349000	1.66923e+07	12916000	1.52617e+07	1.56603e+07					-0.370026	-6.0624	0.0550939	-0.129273	-1.36537	0.507591	-0.0920707	-0.541069	0.74906	0.240753	-3.69979	0.216193	0.277956	-4.95394	0.0629949	0.0372024	-0.648349	0.755061	103.822
sp	Homo sapiens	O15347	HMGB3_HUMAN	HMGB3	High mobility group protein B3	cytoplasm [GO:0005737]; nuclear chromatin [GO:0000790]	FALSE	1	45.69	2830000	358630	341730	327730	280950	279360	311090	304350	258690	308480	276330	370540	313340	342697	290467	290507	320070					-0.23856	-5.03599	0.0929501	-0.238361	-5.03599	0.0689747	-0.0985447	-1.34107	0.480813	0.000198659	0	1	0.140015	-2.79765	0.21765	0.139816	-2.79765	0.25214	115.339
sp	Homo sapiens	O15355	PPM1G_HUMAN	PPM1G	Protein phosphatase 1G	cytoplasm [GO:0005737]; membrane [GO:0016020]; nucleoplasm [GO:0005654]; nucleus [GO:0005634]	FALSE	14	244.88	234000000	15812000	15551000	17808000	15003000	15771000	17224000	18479000	16688000	18584000	19384000	24200000	20579000	1.63903e+07	1.59993e+07	17917000	2.13877e+07					-0.0348334	-0.915321	0.676401	0.128484	-1.67032	0.433034	0.383934	-8.598	0.00643129	0.163317	-3.11907	0.275394	0.418767	-10.2951	0.00316594	0.25545	-5.75966	0.0536486	88.219
sp	Homo sapiens	O15357	SHIP2_HUMAN	INPPL1	Phosphatidylinositol 3 4 5-trisphosphate 5-phosphatase 2	cytoskeleton [GO:0005856]; cytosol [GO:0005829]; filopodium [GO:0030175]; Golgi apparatus [GO:0005794]; lamellipodium [GO:0030027]; nuclear speck [GO:0016607]; nucleus [GO:0005634]; plasma membrane [GO:0005886]	TRUE	3	83.45	7880000	403060	459680	485060	359520	407410	459760	454000	382830	366110	316400	370730	381540	449267	408897	400980	356223	0.15289	0.179445	1.26119		-0.135836	-1.89553	0.426264	-0.164042	-2.51739	0.275026	-0.33479	-6.13705	0.0282157	-0.028206	-0.353954	0.864526	-0.198954	-3.11533	0.181137	-0.170748	-2.45122	0.302262	99.8064
sp	Homo sapiens	O15360	FANCA_HUMAN	FANCA	Fanconi anemia group A protein	cytoplasm [GO:0005737]; Fanconi anaemia nuclear complex [GO:0043240]; nucleoplasm [GO:0005654]; nucleus [GO:0005634]	FALSE	2	61.71	3050000	522280	799090	478790	435670	419630	462670	428690	368140	484440	311280	353430	316920	600053	439323	427090	327210					-0.449808	-5.76945	0.0638154	-0.490551	-6.33191	0.0338712	-0.874874	-12.7964	0.000562047	-0.040743	-0.253401	0.895588	-0.425066	-5.7246	0.0408282	-0.384323	-5.16654	0.0737723	116.471
sp	Homo sapiens	O15371	EIF3D_HUMAN	EIF3D	Eukaryotic translation initiation factor 3 subunit D	cytosol [GO:0005829]; eukaryotic 43S preinitiation complex [GO:0016282]; eukaryotic 48S preinitiation complex [GO:0033290]; eukaryotic translation initiation factor 3 complex [GO:0005852]; eukaryotic translation initiation factor 3 complex, eIF3m [GO:0071541]; membrane [GO:0016020]	FALSE	12	205.73	330000000	6366500	7993000	7448100	7270600	7117300	7451900	8345100	11268000	9214000	11878000	10172000	11032000	7269200	7.27993e+06	9.60903e+06	1.10273e+07					0.00212864	-0.248961	0.903475	0.402595	-7.70093	0.0159671	0.601215	-12.9493	0.000515717	0.400466	-7.14742	0.0567476	0.599087	-12.461	0.00104143	0.198621	-4.01045	0.1343	72.3764
sp	Homo sapiens	O15372	EIF3H_HUMAN	EIF3H	Eukaryotic translation initiation factor 3 subunit H	cytosol [GO:0005829]; eukaryotic 43S preinitiation complex [GO:0016282]; eukaryotic 48S preinitiation complex [GO:0033290]; eukaryotic translation initiation factor 3 complex [GO:0005852]; eukaryotic translation initiation factor 3 complex, eIF3m [GO:0071541]; extracellular exosome [GO:0070062]; membrane [GO:0016020]; polysomal ribosome [GO:0042788]	TRUE	5	120.03	38500000	764930	769520	679080	614330	726920	725540	836600	833070	793120	928180	940520	922960	737843	688930	820930	930553	0.00157963	0.00383423	1.35072		-0.0989571	-1.41289	0.535366	0.153945	-3.82986	0.133091	0.334774	-7.70881	0.0109459	0.252902	-6.26861	0.0767423	0.433731	-10.1476	0.00345023	0.18083	-2.53978	0.288052	96.2704
sp	Homo sapiens	O15374	MOT5_HUMAN	SLC16A4	Monocarboxylate transporter 5	integral component of membrane [GO:0016021]; integral component of plasma membrane [GO:0005887]; membrane [GO:0016020]	TRUE	3	71.18	4190000	248360	155600	215760	136430	158530	220240	221310	170630	226530	220020	271790	235860	206573	171733	206157	242557	0.242706	0.271159	1.4124		-0.266484	-2.20241	0.368631	-0.00291291	-0.330664	0.853899	0.231668	-2.22175	0.289392	0.263571	-2.80884	0.31526	0.498152	-5.48217	0.0468787	0.234581	-1.65904	0.452398	120.123
sp	Homo sapiens	O15375	MOT6_HUMAN	SLC16A5	Monocarboxylate transporter 6	integral component of membrane [GO:0016021]; integral component of plasma membrane [GO:0005887]; membrane [GO:0016020]	TRUE	3	136.69	26700000	925510	1163100	967860	1130000	931020	1083500	1091400	943860	1129600	1116500	1027800	1082400	1.01882e+06	1.04817e+06	1.05495e+06	1.07557e+06	0.896304	0.899669	1.05569		0.0409734	-0.170559	0.933833	0.0502753	-0.563041	0.763701	0.078193	-1.02735	0.571444	0.00930187	-0.355931	0.864526	0.0372196	-0.784256	0.666512	0.0279178	-0.355931	0.848022	88.196
sp	Homo sapiens	O15379	HDAC3_HUMAN	HDAC3	Histone deacetylase 3	cytoplasm [GO:0005737]; cytosol [GO:0005829]; Golgi apparatus [GO:0005794]; histone deacetylase complex [GO:0000118]; mitotic spindle [GO:0072686]; nucleoplasm [GO:0005654]; nucleus [GO:0005634]; plasma membrane [GO:0005886]; transcription repressor complex [GO:0017053]	TRUE	2	76.78	13500000	709960	895580	884320	764760	693550	878800	891990	1073800	872080	637760	586860	768160	829953	779037	945957	664260	0.04815	0.0645668	1.42408		-0.091339	-1.36436	0.548126	0.188744	-2.12796	0.339571	-0.321282	-4.12079	0.0946003	0.280083	-4.29208	0.17133	-0.229943	-1.98511	0.34387	-0.510026	-7.51872	0.0212295	88.2155
sp	Homo sapiens	O15381	NVL_HUMAN	NVL	Nuclear valosin-containing protein-like	membrane [GO:0016020]; nucleolus [GO:0005730]; nucleoplasm [GO:0005654]; nucleus [GO:0005634]; telomerase holoenzyme complex [GO:0005697]	FALSE	2	56.93	4440000	735300	791290	736920	409230	496170	489380	529280	510460	557590	387290	449980	450740	754503	464927	532443	429337					-0.698524	-17.299	0.000202865	-0.502899	-12.0227	0.00156604	-0.813418	-18.6116	2.23902e-05	0.195625	-4.88876	0.134314	-0.114894	-0.977649	0.599752	-0.310519	-6.72837	0.0318106	134.843
sp	Homo sapiens	O15382	BCAT2_HUMAN	BCAT2	Branched-chain-amino-acid aminotransferase mitochondrial	mitochondrial matrix [GO:0005759]; mitochondrion [GO:0005739]	FALSE	1	60.96	1010000	213850	205970	193670	225810	185220	187120	187250	183890	171290	185770	197700	181530	204497	199383	180810	188333					-0.0365325	-0.759428	0.724653	-0.177603	-3.89018	0.129243	-0.118789	-2.15417	0.300361	-0.14107	-2.54495	0.354879	-0.0822565	-1.05495	0.576211	0.0588139	-1.05495	0.615391	110.656
sp	Homo sapiens	O15393	TMPS2_HUMAN	TMPRSS2	Transmembrane protease serine 2	extracellular exosome [GO:0070062]; integral component of plasma membrane [GO:0005887]; plasma membrane [GO:0005886]	TRUE	5	125.69	69100000	2801600	2389500	2463400	2743300	2928900	2799200	2270000	2114700	2463900	1936000	2286500	1850600	2551500	2823800	2.28287e+06	2.02437e+06	0.005176	0.00966707	1.39491		0.146292	-3.21199	0.226048	-0.160499	-3.01938	0.208711	-0.333875	-7.48303	0.0125405	-0.306791	-7.59055	0.0484817	-0.480167	-11.9885	0.00132606	-0.173376	-3.11531	0.213108	115.738
sp	Homo sapiens	O15397	IPO8_HUMAN	IPO8	Importin-8	cytosol [GO:0005829]; nuclear envelope [GO:0005635]; nucleoplasm [GO:0005654]	FALSE	9	202.52	58800000	3510100	3177700	3378800	3546700	3604700	4217800	4519200	3490900	3867800	2603800	3440700	3200600	3.35553e+06	3.78973e+06	3959300	3081700					0.175554	-2.97402	0.252495	0.238703	-3.6438	0.147366	-0.122816	-1.74943	0.380132	0.063149	-0.34023	0.868176	-0.29837	-5.78868	0.0393594	-0.361519	-6.52682	0.0353166	98.9718
sp	Homo sapiens	O15400	STX7_HUMAN	STX7	Syntaxin-7	azurophil granule [GO:0042582]; early endosome [GO:0005769]; early endosome membrane [GO:0031901]; endocytic vesicle [GO:0030139]; endomembrane system [GO:0012505]; endosome [GO:0005768]; extracellular exosome [GO:0070062]; immunological synapse [GO:0001772]; integral component of membrane [GO:0016021]; late endosome [GO:0005770]; lysosomal membrane [GO:0005765]; lysosome [GO:0005764]; perinuclea…	TRUE	3	116.88	31000000	491100	510730	633800	651400	606480	637970	756840	779520	657020	730590	762580	774030	545210	631950	731127	755733	0.00535848	0.009933	1.38613		0.212998	-3.64238	0.184177	0.423309	-8.43465	0.0107118	0.471065	-10.0132	0.00279988	0.210311	-3.36051	0.248967	0.258067	-4.90016	0.0650312	0.0477559	-0.83459	0.684043	73.7382
sp	Homo sapiens	O15403	MOT7_HUMAN	SLC16A6	Monocarboxylate transporter 7	integral component of membrane [GO:0016021]; integral component of plasma membrane [GO:0005887]; membrane [GO:0016020]	TRUE	1	42.48	3530000	226160	190480	259620	254950	204870	271140	327440	289110	371840	383690	566490	407370	225420	243653	329463	452517					0.112214	-0.664085	0.755939	0.547502	-6.39784	0.032664	1.00536	-12.7678	0.000572828	0.435288	-5.0697	0.125756	0.893141	-11.5689	0.00162857	0.457853	-5.0697	0.0778332	72.3103
sp	Homo sapiens	O15427	MOT4_HUMAN	SLC16A3	Monocarboxylate transporter 4	apical plasma membrane [GO:0016324]; basolateral plasma membrane [GO:0016323]; integral component of membrane [GO:0016021]; integral component of plasma membrane [GO:0005887]; integral component of postsynaptic density membrane [GO:0099061]; lateral plasma membrane [GO:0016328]; membrane [GO:0016020]; nuclear membrane [GO:0031965]; parallel fiber to Purkinje cell synapse [GO:0098688]; plasma memb…	TRUE	10	185.55	1620000000	11712000	11366000	10799000	9880900	11034000	10577000	11582000	10302000	10516000	12687000	15068000	16408000	1.12923e+07	10497300	10800000	14721000	0.00342709	0.00697301	1.40236		-0.105325	-2.3662	0.337946	-0.0643123	-1.0917	0.582829	0.382532	-7.43171	0.0129493	0.041013	-0.883282	0.703765	0.487857	-11.0472	0.00211299	0.446844	-9.43039	0.00824731	99.0221
sp	Homo sapiens	O15431	COPT1_HUMAN	SLC31A1	High affinity copper uptake protein 1	integral component of plasma membrane [GO:0005887]; late endosome [GO:0005770]; neuronal cell body [GO:0043025]; plasma membrane [GO:0005886]; recycling endosome [GO:0055037]	TRUE	3	163.64	368000000	6493300	6664400	6288400	6818400	7412800	6443000	6591900	5282100	6341200	5136600	7211700	6120900	6.48203e+06	6891400	6.07173e+06	6156400	0.484078	0.507997	1.135		0.0883507	-0.828067	0.702782	-0.094338	-0.985108	0.615479	-0.0743595	-0.985108	0.584916	-0.182689	-2.15868	0.419037	-0.16271	-2.15868	0.312387	0.0199785	-3.02724e-14	1	101.452
sp	Homo sapiens	O15438	MRP3_HUMAN	ABCC3	Canalicular multispecific organic anion transporter 2	integral component of membrane [GO:0016021]; membrane [GO:0016020]; plasma membrane [GO:0005886]	TRUE	68	418.07	27300000000	277370000	252740000	262670000	327300000	340060000	312590000	270230000	241620000	276250000	215880000	233430000	209000000	264260000	326650000	262700000	2.19437e+08	0.000182541	0.000744181	1.48858		0.305788	-7.75436	0.0234011	-0.00854187	-0.582356	0.756913	-0.268153	-6.97626	0.0169642	-0.314329	-8.93329	0.0300775	-0.573941	-15.4969	0.000241268	-0.259612	-5.78369	0.0530223	103.395
sp	Homo sapiens	O15439	MRP4_HUMAN	ABCC4	Multidrug resistance-associated protein 4	apical plasma membrane [GO:0016324]; basolateral plasma membrane [GO:0016323]; external side of apical plasma membrane [GO:0098591]; integral component of membrane [GO:0016021]; membrane [GO:0016020]; plasma membrane [GO:0005886]; platelet dense granule membrane [GO:0031088]	TRUE	68	388.93	19300000000	236190000	214620000	217420000	321930000	324060000	291270000	247360000	232140000	271170000	221530000	251870000	209750000	2.22743e+08	312420000	2.50223e+08	2.27717e+08	0.0016664	0.00397865	1.4026		0.488105	-12.1696	0.00273434	0.167834	-3.30138	0.177885	0.0318576	-0.0896574	0.955454	-0.32027	-7.58518	0.0484817	-0.456247	-11.9812	0.00133055	-0.135976	-3.1129	0.213286	93.2541
sp	Homo sapiens	O15440	MRP5_HUMAN	ABCC5	Multidrug resistance-associated protein 5	apical plasma membrane [GO:0016324]; basolateral plasma membrane [GO:0016323]; endosome membrane [GO:0010008]; Golgi lumen [GO:0005796]; integral component of plasma membrane [GO:0005887]; membrane [GO:0016020]; plasma membrane [GO:0005886]	TRUE	31	290.23	290000000	11508000	10740000	11459000	14449000	14604000	13789000	11909000	10647000	12201000	10773000	12246000	10707000	1.12357e+07	1.42807e+07	1.15857e+07	11242000	0.00247634	0.00538756	1.27101		0.345978	-9.68756	0.00903119	0.0442553	-0.209741	0.905949	0.000812991	-0.209741	0.897444	-0.301722	-9.23014	0.0274471	-0.345165	-9.23014	0.00575575	-0.0434423	0	1	95.2176
sp	Homo sapiens	O15446	RPA34_HUMAN	CD3EAP	DNA-directed RNA polymerase I subunit RPA34	chromosome [GO:0005694]; cytosol [GO:0005829]; fibrillar center [GO:0001650]; mitochondrion [GO:0005739]; nucleolus [GO:0005730]; nucleoplasm [GO:0005654]; RNA polymerase I complex [GO:0005736]; RNA polymerase I transcription regulator complex [GO:0000120]	FALSE	9	165.49	96300000	2847100	3077200	3052300	3536700	3410200	3419200	3300500	3244400	3390900	3590200	4024400	3342900	2992200	3.45537e+06	3.31193e+06	3652500					0.207632	-6.6791	0.0398143	0.146467	-4.48461	0.0933853	0.287678	-8.8832	0.00542312	-0.0611652	-1.21974	0.616253	0.0800455	-1.21974	0.526398	0.141211	-2.97238	0.229428	84.912
sp	Homo sapiens	O15455	TLR3_HUMAN	TLR3	Toll-like receptor 3	cytoplasm [GO:0005737]; early endosome [GO:0005769]; endolysosome membrane [GO:0036020]; endoplasmic reticulum membrane [GO:0005789]; endosome membrane [GO:0010008]; extracellular matrix [GO:0031012]; extracellular space [GO:0005615]; Golgi membrane [GO:0000139]; integral component of plasma membrane [GO:0005887]; lysosomal membrane [GO:0005765]; membrane [GO:0016020]	TRUE	1	55.72	2910000	169750	180340	144180	190760	207370	201470	225330	228150	203110	221580	275330	254730	164757	199867	218863	250547					0.278701	-5.0061	0.0942987	0.409693	-8.13755	0.0125588	0.604743	-13.2732	0.000430059	0.130992	-1.89613	0.466388	0.326041	-7.04348	0.0194271	0.195049	-3.94799	0.138672	81.4116
sp	Homo sapiens	O15460	P4HA2_HUMAN	P4HA2	Prolyl 4-hydroxylase subunit alpha-2	cytosol [GO:0005829]; endoplasmic reticulum [GO:0005783]; endoplasmic reticulum lumen [GO:0005788]; intracellular membrane-bounded organelle [GO:0043231]; nucleoplasm [GO:0005654]	FALSE	3	151.55	5470000	154710	142860	156400	118530	157220	139510	109720	107390	129980	138500	188150	152450	151323	138420	115697	159700					-0.128582	-1.23012	0.584166	-0.387287	-6.82909	0.0257037	0.0777299	-0.592139	0.726838	-0.258705	-4.61487	0.149385	0.206312	-2.13324	0.316978	0.465017	-8.03707	0.0164942	109.502
sp	Homo sapiens	O15484	CAN5_HUMAN	CAPN5	Calpain-5	cell surface [GO:0009986]; cytoplasm [GO:0005737]; extracellular exosome [GO:0070062]; focal adhesion [GO:0005925]	TRUE	4	111.03	31600000	1542800	1433300	1491800	1683700	1675600	1731500	1330900	1432300	1559600	1798700	1774600	1828900	1489300	1.69693e+06	1.44093e+06	1.80073e+06	0.000852453	0.00235852	1.2497		0.188295	-4.22794	0.138479	-0.0476308	-1.5234	0.467712	0.27395	-7.36138	0.0134776	-0.235926	-6.84302	0.0624044	0.0856547	-1.91414	0.357189	0.321581	-9.96168	0.00635404	96.0065
sp	Homo sapiens	O15488	GLYG2_HUMAN	GYG2	Glycogenin-2	cytoplasm [GO:0005737]; cytosol [GO:0005829]	FALSE	1	30.03	1640000	298410	258900	242160	190820	223650	256750	185510	186110	181600	135180	184300	125750	266490	223740	184407	148410					-0.252258	-3.02644	0.246099	-0.531191	-7.49447	0.0179403	-0.844493	-13.4256	0.00039536	-0.278932	-3.11843	0.275394	-0.592235	-9.2987	0.0055575	-0.313303	-4.73806	0.0918488	145.027
sp	Homo sapiens	O15498	YKT6_HUMAN	YKT6	Synaptobrevin homolog YKT6	apical dendrite [GO:0097440]; basal dendrite [GO:0097441]; cytoplasm [GO:0005737]; cytoplasmic vesicle membrane [GO:0030659]; cytosol [GO:0005829]; endoplasmic reticulum [GO:0005783]; endoplasmic reticulum-Golgi intermediate compartment membrane [GO:0033116]; endosome [GO:0005768]; Golgi apparatus [GO:0005794]; Golgi membrane [GO:0000139]; integral component of plasma membrane [GO:0005887]; mitoc…	TRUE	3	85.56	20600000	741930	902600	771390	959110	940660	1079500	1364600	1329400	1159000	2002100	1684100	1574100	805307	993090	1.28433e+06	1.75343e+06	6.5473e-05	0.000362354	2.17735	4	0.302386	-5.00029	0.094542	0.67341	-13.4741	0.00074636	1.12257	-21.5759	4.86067e-06	0.371023	-7.28301	0.0538537	0.820186	-17.2158	0.000109982	0.449163	-9.66964	0.00731017	61.3652
sp	Homo sapiens	O15504	NUP42_HUMAN	NUP42	Nucleoporin NUP42	cytosol [GO:0005829]; host cell [GO:0043657]; nuclear membrane [GO:0031965]; nuclear pore [GO:0005643]; nucleoplasm [GO:0005654]; nucleus [GO:0005634]	FALSE	1	50.13	3410000	200890	227700	204410	137840	132420	172250	231060	272750	207310	233470	234380	312080	211000	147503	237040	259977					-0.516495	-7.15439	0.0313658	0.167888	-2.20238	0.326505	0.301139	-3.74378	0.118228	0.684383	-10.6009	0.017707	0.817635	-12.214	0.00117868	0.133252	-0.916664	0.657681	93.9265
sp	Homo sapiens	O15516	CLOCK_HUMAN	CLOCK	Circadian locomoter output cycles protein kaput	chromatoid body [GO:0033391]; chromosome [GO:0005694]; CLOCK-BMAL transcription complex [GO:1990513]; cytosol [GO:0005829]; intracellular membrane-bounded organelle [GO:0043231]; nuclear chromatin [GO:0000790]; nucleoplasm [GO:0005654]; nucleus [GO:0005634]; transcription regulator complex [GO:0005667]	FALSE	3	86.33	10600000	778200	834330	801690	917230	846990	833570	733740	895550	789690	797600	754490	785820	804740	865930	806327	779303					0.105728	-2.11264	0.383201	0.00284169	-0.13384	0.938329	-0.0463378	-0.922779	0.605275	-0.102886	-1.86957	0.471434	-0.152065	-3.64946	0.133135	-0.0491794	-1.1223	0.594793	95.5932
sp	Homo sapiens	O15523	DDX3Y_HUMAN	DDX3Y	ATP-dependent RNA helicase DDX3Y	cytosol [GO:0005829]; membrane [GO:0016020]; nucleoplasm [GO:0005654]; nucleus [GO:0005634]; P granule [GO:0043186]	FALSE	5	327.95	126000000	1755000	2271200	2093800	1669000	1600400	1541900	2034300	2893800	1865900	3332400	2195900	2948300	2040000	1.60377e+06	2.26467e+06	2.82553e+06					-0.347105	-3.04509	0.24446	0.15073	-1.34178	0.514054	0.469954	-5.73038	0.0359878	0.497834	-5.31432	0.112928	0.817059	-10.1882	0.00336967	0.319224	-3.42344	0.182428	80.3759
sp	Homo sapiens	O15525	MAFG_HUMAN	MAFG	Transcription factor MafG	nucleoplasm [GO:0005654]; nucleus [GO:0005634]	FALSE	1	45.62	1230000	105450	102830	105600	95993	76840	80280	96218	96074	101340	92914	100120	94928	104627	84371	97877.3	95987.3					-0.310431	-7.29654	0.0293851	-0.0962039	-1.30452	0.524008	-0.124335	-2.77891	0.208118	0.214228	-4.96522	0.13076	0.186097	-3.19368	0.173125	-0.0281308	-0.991945	0.633389	110.17
sp	Homo sapiens	O15530	PDPK1_HUMAN	PDPK1	3-phosphoinositide-dependent protein kinase 1	cell projection [GO:0042995]; cytoplasm [GO:0005737]; cytoplasmic vesicle [GO:0031410]; cytosol [GO:0005829]; focal adhesion [GO:0005925]; nucleus [GO:0005634]; perikaryon [GO:0043204]; plasma membrane [GO:0005886]; postsynaptic density [GO:0014069]	TRUE	7	142.12	42300000	1924000	1899600	1883200	2239500	2124200	3221600	3244500	2882800	3526500	2986800	3365400	3214100	1.90227e+06	2.52843e+06	3.21793e+06	3.18877e+06	0.00303946	0.00634644	1.69163	4	0.410524	-6.15335	0.0523885	0.758415	-13.2534	0.000833282	0.745279	-13.2534	0.000433417	0.347891	-5.86391	0.0912331	0.334755	-5.86391	0.0378084	-0.0131359	0	1	71.0133
sp	Homo sapiens	O15533	TPSN_HUMAN	TAPBP	Tapasin	endoplasmic reticulum [GO:0005783]; endoplasmic reticulum-Golgi intermediate compartment membrane [GO:0033116]; endoplasmic reticulum membrane [GO:0005789]; Golgi membrane [GO:0000139]; integral component of lumenal side of endoplasmic reticulum membrane [GO:0071556]; integral component of membrane [GO:0016021]; MHC class I peptide loading complex [GO:0042824]; phagocytic vesicle membrane [GO:003…	FALSE	1	31.63	45400000	987680	1284100	973270	756540	777830	788460	808000	802870	861610	1326600	1412800	1375700	1.08168e+06	774277	824160	1371700					-0.482357	-10.4384	0.00635621	-0.392282	-8.75943	0.00889715	0.342687	-7.16467	0.0151083	0.0900753	-0.90721	0.697608	0.825044	-17.7137	8.7359e-05	0.734969	-16.4297	0.000412726	97.5048
sp	Homo sapiens	O15541	R113A_HUMAN	RNF113A	E3 ubiquitin-protein ligase RNF113A	nuclear speck [GO:0016607]; nucleoplasm [GO:0005654]; nucleus [GO:0005634]; U2-type precatalytic spliceosome [GO:0071005]; U2-type spliceosomal complex [GO:0005684]	FALSE	3	69.04	10700000	756360	821530	745090	864060	786330	871990	863260	786180	846510	849430	913960	844770	774327	840793	831983	869387					0.118809	-2.66901	0.292229	0.103612	-2.66901	0.252616	0.167056	-4.82018	0.0621673	-0.0151966	-5.18955e-14	1	0.0482467	-1.2913	0.506835	0.0634433	-1.2913	0.546481	91.2242
sp	Homo sapiens	O15550	KDM6A_HUMAN	KDM6A	Lysine-specific demethylase 6A	histone methyltransferase complex [GO:0035097]; MLL3/4 complex [GO:0044666]; nuclear chromatin [GO:0000790]; nucleoplasm [GO:0005654]; nucleus [GO:0005634]	FALSE	3	68.39	4840000	444210	439400	417040	415430	395600	410580	392130	407840	386970	306850	296260	294550	433550	407203	395647	299220					-0.090449	-3.02018	0.246836	-0.131986	-4.22206	0.107268	-0.534992	-18.0826	2.96904e-05	-0.0415368	-0.643458	0.782913	-0.444543	-14.6715	0.000353036	-0.403006	-13.5852	0.00127254	115.708
sp	Homo sapiens	O15554	KCNN4_HUMAN	KCNN4	Intermediate conductance calcium-activated potassium channel protein 4	neuronal cell body [GO:0043025]; neuron projection [GO:0043005]; plasma membrane [GO:0005886]; vesicle [GO:0031982]; voltage-gated potassium channel complex [GO:0008076]	TRUE	8	150.06	198000000	2859000	2539400	2573400	2567600	2591200	2621300	2453100	1964600	2328100	1969600	2311500	1896000	2.65727e+06	2.59337e+06	2248600	2.05903e+06	0.0172879	0.0266428	1.29054		-0.0351168	-0.326539	0.876154	-0.240916	-4.74061	0.0810717	-0.367976	-8.46247	0.00699406	-0.205799	-4.05589	0.185525	-0.332859	-7.75657	0.0130504	-0.12706	-2.37896	0.313137	119.645
sp	Homo sapiens	O43143	DHX15_HUMAN	DHX15	Pre-mRNA-splicing factor ATP-dependent RNA helicase DHX15	nuclear speck [GO:0016607]; nucleolus [GO:0005730]; nucleoplasm [GO:0005654]; nucleus [GO:0005634]; spliceosomal complex [GO:0005681]; U12-type spliceosomal complex [GO:0005689]	FALSE	17	194.66	177000000	8939000	9784300	10124000	7486500	7959400	7661400	7902100	9553700	8112000	10570000	8737600	9144500	9.61577e+06	7.70243e+06	8522600	9.48403e+06					-0.320088	-7.82722	0.0226776	-0.174108	-3.31385	0.176754	-0.0199012	-0.545061	0.74748	0.145979	-3.13061	0.274	0.300186	-6.70218	0.0234321	0.154207	-2.33508	0.318886	101.221
sp	Homo sapiens	O43148	MCES_HUMAN	RNMT	mRNA cap guanine-N7 methyltransferase	fibrillar center [GO:0001650]; mRNA cap binding complex [GO:0005845]; mRNA cap methyltransferase complex [GO:0031533]; nucleoplasm [GO:0005654]; nucleus [GO:0005634]; receptor complex [GO:0043235]	FALSE	3	64.95	5870000	692910	771470	717690	703060	703410	796160	750480	799670	773840	1327000	1250500	1349700	727357	734210	774663	1.30907e+06					0.0135298	-0.279475	0.891911	0.0909065	-1.49988	0.473511	0.847804	-21.9418	4.00936e-06	0.0773767	-1.96613	0.45409	0.834274	-22.2999	1.29202e-05	0.756897	-20.3484	8.76153e-05	78.1779
sp	Homo sapiens	O43149	ZZEF1_HUMAN	ZZEF1	Zinc finger ZZ-type and EF-hand domain-containing protein 1	0	FALSE	25	257.21	198000000	8096200	8218600	7674000	8860600	9073000	9611300	10583000	8661300	9880800	6146300	7281300	6595400	7.99627e+06	9.18163e+06	9.70837e+06	6.67433e+06					0.199424	-4.65295	0.111637	0.279902	-5.62756	0.0499409	-0.260703	-5.04907	0.0541898	0.0804778	-0.471393	0.842591	-0.460127	-11.1569	0.00199596	-0.540605	-12.0621	0.00241068	96.4965
sp	Homo sapiens	O43150	ASAP2_HUMAN	ASAP2	Arf-GAP with SH3 domain ANK repeat and PH domain-containing protein 2	Golgi cisterna membrane [GO:0032580]; plasma membrane [GO:0005886]	TRUE	3	109.08	44600000	724750	873750	790020	814600	776820	878730	846580	810750	916350	871850	918180	841040	796173	823383	857893	877023	0.35277	0.380038	1.10155		0.0484817	-0.299855	0.886283	0.107716	-1.59308	0.450092	0.139533	-2.41453	0.257863	0.059234	-1.13057	0.640688	0.091051	-1.88401	0.362899	0.0318169	-0.499412	0.811562	86.4219
sp	Homo sapiens	O43155	FLRT2_HUMAN	FLRT2	Leucine-rich repeat transmembrane protein FLRT2	cell-cell junction [GO:0005911]; endoplasmic reticulum membrane [GO:0005789]; extracellular exosome [GO:0070062]; extracellular matrix [GO:0031012]; extracellular space [GO:0005615]; focal adhesion [GO:0005925]; integral component of plasma membrane [GO:0005887]; neuron projection [GO:0043005]; plasma membrane [GO:0005886]; synapse [GO:0045202]	TRUE	5	139.62	31800000	3342500	3027500	3845200	2107000	2323000	2635200	1916900	2203300	1911300	2910100	2422000	2820800	3.40507e+06	2.35507e+06	2010500	2.71763e+06	0.00158871	0.00384682	1.69364	1	-0.531915	-11.3155	0.00422499	-0.760129	-14.6028	0.000421091	-0.325332	-6.16736	0.0277062	-0.228214	-2.40315	0.377172	0.206583	-3.74199	0.126579	0.434796	-7.45283	0.0219023	127.476
sp	Homo sapiens	O43156	TTI1_HUMAN	TTI1	TELO2-interacting protein 1 homolog	ASTRA complex [GO:0070209]; cytoplasm [GO:0005737]; TORC1 complex [GO:0031931]; TORC2 complex [GO:0031932]	FALSE	10	192.16	113000000	5195200	4467000	5194500	4836100	4817800	5215600	6231600	4831200	5078700	3982800	4316800	4443000	4.95223e+06	4956500	5380500	4.24753e+06					0.00124244	-0.0318154	0.989047	0.119661	-2.09451	0.345351	-0.221454	-4.16772	0.0918556	0.118419	-2.03414	0.441176	-0.222696	-4.24002	0.095237	-0.341115	-7.5263	0.0211547	106.368
sp	Homo sapiens	O43157	PLXB1_HUMAN	PLXNB1	Plexin-B1	extracellular region [GO:0005576]; integral component of plasma membrane [GO:0005887]; plasma membrane [GO:0005886]; semaphorin receptor complex [GO:0002116]	TRUE	38	315.32	4260000000	77778000	78200000	75981000	77193000	75497000	78173000	74065000	59513000	68811000	43779000	56332000	48507000	7.73197e+07	7.69543e+07	67463000	4.95393e+07	0.000590658	0.00175857	1.56077	2	-0.00683285	-0.0830489	0.96853	-0.196739	-5.18225	0.0635464	-0.642261	-16.3276	7.59135e-05	-0.189906	-4.99116	0.129567	-0.635428	-16.1789	0.000176386	-0.445522	-10.5463	0.00475091	114.685
sp	Homo sapiens	O43159	RRP8_HUMAN	RRP8	Ribosomal RNA-processing protein 8	chromatin silencing complex [GO:0005677]; cytosol [GO:0005829]; nucleolus [GO:0005730]; nucleoplasm [GO:0005654]; plasma membrane [GO:0005886]; rDNA heterochromatin [GO:0033553]	TRUE	10	188.67	82100000	4032300	4197000	4283100	3321600	3552800	3726500	3542600	3629300	3703900	2846800	3373200	3203300	4170800	3.53363e+06	3.62527e+06	3141100	0.00174828	0.00411685	1.32782		-0.239172	-4.71478	0.108399	-0.202237	-3.71444	0.141831	-0.409054	-10.8889	0.0016848	0.0369348	-0.502577	0.835515	-0.169882	-4.70532	0.0728027	-0.206817	-5.73855	0.0542425	111.46
sp	Homo sapiens	O43166	SI1L1_HUMAN	SIPA1L1	Signal-induced proliferation-associated 1-like protein 1	cytoplasm [GO:0005737]; cytoskeleton [GO:0005856]; dendritic spine [GO:0043197]; postsynaptic density [GO:0014069]	FALSE	1	77.71	1450000	88157	98728	79421	93793	105320	79445	95253	135510	93639	88010	92157	89723	88768.7	92852.7	108134	89963.3					0.0648928	-0.659659	0.757272	0.284698	-3.03863	0.206381	0.0192866	-0.316841	0.845969	0.219805	-1.92558	0.461794	-0.0456062	-0.288957	0.859231	-0.265411	-2.44074	0.303995	92.8656
sp	Homo sapiens	O43169	CYB5B_HUMAN	CYB5B	Cytochrome b5 type B	integral component of membrane [GO:0016021]; intracellular membrane-bounded organelle [GO:0043231]; membrane [GO:0016020]; mitochondrial outer membrane [GO:0005741]	FALSE	2	59.81	9440000	257480	223830	290870	296950	302530	310250	309030	305060	325670	281460	365490	365020	257393	303243	313253	337323					0.236501	-3.11827	0.236651	0.283355	-3.78892	0.136238	0.390157	-6.65997	0.0205705	0.0468539	-0.336935	0.868256	0.153656	-2.31168	0.286437	0.106802	-1.73218	0.437047	85.0321
sp	Homo sapiens	O43172	PRP4_HUMAN	PRPF4	U4/U6 small nuclear ribonucleoprotein Prp4	Cajal body [GO:0015030]; nuclear speck [GO:0016607]; nucleoplasm [GO:0005654]; nucleus [GO:0005634]; spliceosomal complex [GO:0005681]; spliceosomal snRNP complex [GO:0097525]; U2-type precatalytic spliceosome [GO:0071005]; U4/U6 snRNP [GO:0071001]; U4/U6 x U5 tri-snRNP complex [GO:0046540]	FALSE	7	218.08	106000000	2673000	3276000	2792100	2655200	2593000	3234800	2513400	2958800	3217400	3374500	3453700	3431100	2913700	2.82767e+06	2.89653e+06	3.41977e+06					-0.0432403	-1.07667	0.628243	-0.00852507	-0.156521	0.927542	0.231046	-3.85503	0.110806	0.0347152	-0.848842	0.712416	0.274286	-5.8052	0.0390436	0.239571	-4.19397	0.121898	88.6739
sp	Homo sapiens	O43175	SERA_HUMAN	PHGDH	D-3-phosphoglycerate dehydrogenase	cytosol [GO:0005829]; extracellular exosome [GO:0070062]	TRUE	17	272.54	487000000	10403000	11166000	9872000	12314000	13515000	13588000	14516000	13429000	14404000	12041000	12649000	12321000	1.04803e+07	13139000	1.41163e+07	12337000	0.000388939	0.0012984	1.34694		0.326171	-10.518	0.00613341	0.429681	-13.5461	0.000720513	0.235307	-7.23024	0.0145402	0.10351	-2.07045	0.434559	-0.0908639	-2.07045	0.327879	-0.194374	-5.1349	0.0751288	83.1032
sp	Homo sapiens	O43187	IRAK2_HUMAN	IRAK2	Interleukin-1 receptor-associated kinase-like 2	cytoplasm [GO:0005737]; cytosol [GO:0005829]; endosome membrane [GO:0010008]; nucleus [GO:0005634]; plasma membrane [GO:0005886]	TRUE	2	69.61	8660000	273810	275690	243600	431890	430520	476460	409410	350830	465240	220860	297290	240220	264367	446290	408493	252790	0.00044631	0.00143205	1.76546	3	0.755441	-13.9046	0.00112698	0.627772	-10.7055	0.0031577	-0.0646009	-0.608472	0.719886	-0.127669	-2.25083	0.402383	-0.820042	-14.9281	0.00030883	-0.692373	-11.8495	0.00263951	79.8315
sp	Homo sapiens	O43194	GPR39_HUMAN	GPR39	G-protein coupled receptor 39	integral component of plasma membrane [GO:0005887]; plasma membrane [GO:0005886]	TRUE	8	168.15	830000000	7481600	5562900	6708800	9189600	10890000	9194800	8593200	7878900	9340800	7542600	8539800	7783400	6.58443e+06	9.75813e+06	8604300	7.95527e+06	0.00973349	0.0164811	1.482		0.567546	-10.6081	0.005852	0.385999	-7.05955	0.0226784	0.272851	-4.1897	0.0905832	-0.181547	-2.28606	0.39639	-0.294695	-4.94465	0.0633767	-0.113148	-1.71336	0.440787	90.9558
sp	Homo sapiens	O43237	DC1L2_HUMAN	DYNC1LI2	Cytoplasmic dynein 1 light intermediate chain 2	centrosome [GO:0005813]; cytoplasmic dynein complex [GO:0005868]; cytosol [GO:0005829]; kinetochore [GO:0000776]; late endosome [GO:0005770]; lysosome [GO:0005764]; membrane [GO:0016020]; microtubule [GO:0005874]	FALSE	8	183.46	84200000	3125100	3094500	3126200	3028500	3329900	3615000	3937600	3240000	3390000	3089300	3390700	3340800	3.11527e+06	3.32447e+06	3.52253e+06	3273600					0.0937672	-1.20668	0.590511	0.177258	-2.62905	0.258117	0.0715224	-1.20668	0.51927	0.0834904	-0.971708	0.680064	-0.0222449	0	1	-0.105735	-0.971708	0.639697	94.4434
sp	Homo sapiens	O43242	PSMD3_HUMAN	PSMD3	26S proteasome non-ATPase regulatory subunit 3	cytosol [GO:0005829]; extracellular exosome [GO:0070062]; extracellular region [GO:0005576]; ficolin-1-rich granule lumen [GO:1904813]; membrane [GO:0016020]; nucleoplasm [GO:0005654]; nucleus [GO:0005634]; proteasome accessory complex [GO:0022624]; proteasome complex [GO:0000502]; proteasome regulatory particle, lid subcomplex [GO:0008541]; secretory granule lumen [GO:0034774]	TRUE	30	281.84	1820000000	30081000	29125000	29095000	35902000	36374000	37294000	42758000	44876000	40536000	35524000	34389000	37107000	2.94337e+07	3.65233e+07	4.27233e+07	3.56733e+07	8.79675e-06	0.000101641	1.45151		0.311351	-10.7982	0.00539057	0.537557	-17.0449	0.000117091	0.277379	-8.39873	0.00725971	0.226206	-5.86365	0.0912331	-0.0339724	-1.40817	0.473814	-0.260178	-8.34653	0.014131	83.3536
sp	Homo sapiens	O43252	PAPS1_HUMAN	PAPSS1	Bifunctional 3'-phosphoadenosine 5'-phosphosulfate synthase 1	cytosol [GO:0005829]	FALSE	2	49.1	24400000	1080100	1204800	1060900	1057200	1117300	1140100	1188300	1059900	1094300	1452200	1388000	1273000	1.11527e+06	1.10487e+06	1.11417e+06	1.37107e+06					-0.0135164	-0.0015081	0.999571	-0.00142365	-0.475054	0.796857	0.29791	-8.40069	0.00725266	0.0120928	-0.477003	0.841109	0.311426	-8.40427	0.00909462	0.299334	-7.40915	0.0224013	91.8186
sp	Homo sapiens	O43264	ZW10_HUMAN	ZW10	Centromere/kinetochore protein zw10 homolog	condensed chromosome kinetochore [GO:0000777]; cytosol [GO:0005829]; Dsl1/NZR complex [GO:0070939]; endoplasmic reticulum [GO:0005783]; endoplasmic reticulum membrane [GO:0005789]; kinetochore [GO:0000776]; kinetochore microtubule [GO:0005828]; lipid droplet [GO:0005811]; membrane [GO:0016020]; nucleus [GO:0005634]; RZZ complex [GO:1990423]; spindle pole [GO:0000922]	FALSE	16	175.98	129000000	4162200	3954900	3963500	5014200	4739600	5067100	5637000	5165800	5492200	3814700	4352200	4030200	4.02687e+06	4940300	5.43167e+06	4065700					0.294941	-9.27815	0.0111287	0.431737	-12.3795	0.00132238	0.0138461	-0.443676	0.790092	0.136796	-2.03587	0.441176	-0.281095	-8.35736	0.00932349	-0.417891	-11.5312	0.00300622	90.1664
sp	Homo sapiens	O43272	PROD_HUMAN	PRODH	Proline dehydrogenase 1 mitochondrial	mitochondrial inner membrane [GO:0005743]; mitochondrial matrix [GO:0005759]; mitochondrion [GO:0005739]	FALSE	2	94.34	10700000	436550	453160	430380	437890	472190	504500	458910	438990	550800	330910	412450	320600	440030	471527	482900	354653					0.0997375	-0.763197	0.723871	0.134123	-1.73655	0.418466	-0.311192	-4.77717	0.0637691	0.0343851	-0.719243	0.753046	-0.41093	-6.26743	0.0299194	-0.445315	-7.69814	0.0195048	99.8336
sp	Homo sapiens	O43280	TREA_HUMAN	TREH	Trehalase	anchored component of membrane [GO:0031225]; anchored component of plasma membrane [GO:0046658]; extracellular exosome [GO:0070062]	TRUE	1	36.39	0	652000	573440	454570	709020	481830	680990	484440	531690	389750	511690	328660	593190	560003	623947	468627	477847					0.155987	-1.02592	0.642637	-0.256996	-1.77339	0.410963	-0.228888	-1.77339	0.374977	-0.412984	-3.39904	0.2445	-0.384875	-3.39904	0.153569	0.0281087	0	1	122.417
sp	Homo sapiens	O43286	B4GT5_HUMAN	B4GALT5	Beta-1 4-galactosyltransferase 5	Golgi cisterna membrane [GO:0032580]; Golgi membrane [GO:0000139]; integral component of membrane [GO:0016021]	FALSE	1	53.61	22400000	58895	57804	60199	133230	138530	115870	207530	145820	134530	129210	131940	119330	58966	129210	162627	126827					1.13176	-17.7382	0.000161133	1.46361	-21.7617	9.5523e-06	1.1049	-17.7382	3.54181e-05	0.331846	-4.60253	0.14982	-0.0268596	-2.73893e-14	1	-0.358706	-4.60253	0.0986298	49.3228
sp	Homo sapiens	O43290	SNUT1_HUMAN	SART1	U4/U6.U5 tri-snRNP-associated protein 1	Cajal body [GO:0015030]; catalytic step 2 spliceosome [GO:0071013]; cytoplasm [GO:0005737]; cytosol [GO:0005829]; Golgi apparatus [GO:0005794]; nuclear speck [GO:0016607]; nucleoplasm [GO:0005654]; nucleus [GO:0005634]; U2-type precatalytic spliceosome [GO:0071005]; U4/U6 x U5 tri-snRNP complex [GO:0046540]	FALSE	9	188.59	36300000	1352000	1440000	1468300	1508400	1642700	1621000	1260200	1347300	1325700	1315200	1413300	1385700	1420100	1590700	1.31107e+06	1371400					0.163669	-2.72715	0.284646	-0.115251	-2.8884	0.224169	-0.0503431	-1.88277	0.352676	-0.278921	-6.89284	0.0619068	-0.214012	-5.68035	0.0417905	0.0649084	-0.593905	0.776504	94.9894
sp	Homo sapiens	O43291	SPIT2_HUMAN	SPINT2	Kunitz-type protease inhibitor 2	cytoplasm [GO:0005737]; extracellular region [GO:0005576]; integral component of membrane [GO:0016021]; plasma membrane [GO:0005886]	TRUE	3	139.62	67300000	5972100	4723000	5258100	3854200	3606200	3934500	3406900	3089400	3145400	2999800	3362900	3420300	5.31773e+06	3798300	3213900	3261000	0.000146965	0.000638167	1.6546	1	-0.485458	-11.1293	0.0046013	-0.726486	-16.6344	0.000144574	-0.705497	-16.6344	6.43805e-05	-0.241029	-4.96762	0.13075	-0.220039	-4.96762	0.0624766	0.0209894	0	1	153.22
sp	Homo sapiens	O43292	GPAA1_HUMAN	GPAA1	Glycosylphosphatidylinositol anchor attachment 1 protein	endoplasmic reticulum membrane [GO:0005789]; GPI-anchor transamidase complex [GO:0042765]; membrane [GO:0016020]	FALSE	3	103.84	72300000	246060	217590	260780	218470	195470	314060	286660	251330	251690	208600	251110	201640	241477	242667	263227	220450					0.00709216	-0.0753323	0.97239	0.124422	-0.772197	0.686737	-0.131432	-1.37306	0.471881	0.11733	-0.880176	0.704418	-0.138524	-1.25008	0.517719	-0.255854	-2.55947	0.285641	101.697
sp	Homo sapiens	O43293	DAPK3_HUMAN	DAPK3	Death-associated protein kinase 3	actin filament [GO:0005884]; cytoplasm [GO:0005737]; membrane raft [GO:0045121]; nucleoplasm [GO:0005654]; nucleus [GO:0005634]; PML body [GO:0016605]	FALSE	2	81.11	14000000	1172700	1050600	1078200	982370	962100	1320600	1168600	1404300	1250100	1067400	1114300	1023100	1100500	1.08836e+06	1.27433e+06	1.06827e+06					-0.0160077	-0.382406	0.855332	0.211584	-4.01586	0.120261	-0.0428873	-0.382406	0.816163	0.227591	-4.80643	0.138793	-0.0268796	0	1	-0.254471	-4.80643	0.0885765	103.516
sp	Homo sapiens	O43294	TGFI1_HUMAN	TGFB1I1	Transforming growth factor beta-1-induced transcript 1 protein	cytoskeleton [GO:0005856]; cytosol [GO:0005829]; focal adhesion [GO:0005925]; nuclear matrix [GO:0016363]; plasma membrane [GO:0005886]	TRUE	5	130.06	32600000	1177500	1284600	1055300	1203000	1122800	1140800	1249100	1451400	1362000	1147100	1021600	1101200	1.17247e+06	1.15553e+06	1.35417e+06	1.08997e+06	0.0301464	0.0427106	1.24239		-0.020988	-0.431573	0.836611	0.207858	-5.37399	0.0573299	-0.105263	-1.7005	0.390893	0.228846	-6.28584	0.0766254	-0.0842749	-1.05577	0.576206	-0.313121	-8.25401	0.0148015	98.698
sp	Homo sapiens	O43299	AP5Z1_HUMAN	AP5Z1	AP-5 complex subunit zeta-1	AP-5 adaptor complex [GO:0044599]; AP-type membrane coat adaptor complex [GO:0030119]; cytoplasm [GO:0005737]; nuclear speck [GO:0016607]; nucleoplasm [GO:0005654]; nucleus [GO:0005634]	FALSE	1	41.14	619000	167140	139540	137140	132040	141730	133550	132850	143940	121320	153840	160990	143770	147940	135773	132703	152867					-0.123812	-2.96045	0.254409	-0.156808	-3.78113	0.136753	0.0472617	-0.0367421	0.980666	-0.0329955	-0.424183	0.850721	0.171074	-3.03773	0.189104	0.204069	-3.86294	0.144773	117.439
sp	Homo sapiens	O43301	HS12A_HUMAN	HSPA12A	Heat shock 70 kDa protein 12A	cytoplasm [GO:0005737]; extracellular exosome [GO:0070062]; nucleus [GO:0005634]	TRUE	6	144.83	30100000	3734300	3486500	3803800	3886900	4075900	4293600	5786000	4960100	5027700	3919800	4234400	4251200	3.67487e+06	4.08547e+06	5.25793e+06	4.13513e+06	0.000490152	0.00153301	1.43078		0.152809	-3.17442	0.230145	0.516804	-13.6233	0.000695287	0.170242	-3.17442	0.164519	0.363995	-9.36233	0.026679	0.017433	0	1	-0.346562	-9.36233	0.00853816	87.0801
sp	Homo sapiens	O43303	CP110_HUMAN	CCP110	Centriolar coiled-coil protein of 110 kDa	centriole [GO:0005814]; centrosome [GO:0005813]; cilium [GO:0005929]; cytosol [GO:0005829]; protein-containing complex [GO:0032991]	FALSE	2	80.24	1390000	104770	155280	77323	73972	89383	71717	59647	64630	79748	68985	66950	69825	112458	78357.3	68008.3	68586.7					-0.521242	-4.85211	0.101372	-0.725599	-7.06971	0.0225678	-0.713382	-7.06971	0.0160171	-0.204357	-1.2279	0.614345	-0.19214	-1.2279	0.523827	0.0122166	-2.01816e-14	1	127.999
sp	Homo sapiens	O43306	ADCY6_HUMAN	ADCY6	Adenylate cyclase type 6	cilium [GO:0005929]; integral component of plasma membrane [GO:0005887]; intrinsic component of plasma membrane [GO:0031226]; membrane [GO:0016020]; plasma membrane [GO:0005886]; stereocilium [GO:0032420]	TRUE	23	317.66	860000000	9135500	8826000	9384500	9315700	9284400	9216200	8089200	6917200	7817900	6401300	7256400	6255400	9.11533e+06	9272100	7608100	6637700	0.000335036	0.00115947	1.39688		0.0246007	-0.117097	0.956036	-0.260759	-7.27533	0.0201905	-0.457612	-12.1418	0.000816881	-0.28536	-7.54609	0.0491093	-0.482213	-12.3843	0.00108053	-0.196853	-3.5568	0.170005	111.978
sp	Homo sapiens	O43310	CTIF_HUMAN	CTIF	CBP80/20-dependent translation initiation factor	cytosol [GO:0005829]; perinuclear region of cytoplasm [GO:0048471]	FALSE	1	29.1	0	52160	55327	42868	64148	44715	54402	35797	48062	48964	48545	57528	40781	50118.3	54421.7	44274.3	48951.3					0.118843	-0.589001	0.782724	-0.178868	-1.59068	0.450366	-0.0339903	-0.354856	0.828325	-0.297711	-2.5481	0.354338	-0.152833	-1.05617	0.576155	0.144878	-1.05617	0.615117	105.499
sp	Homo sapiens	O43314	VIP2_HUMAN	PPIP5K2	Inositol hexakisphosphate and diphosphoinositol-pentakisphosphate kinase 2	cytosol [GO:0005829]	FALSE	3	69.62	4780000	304430	320830	359810	339550	282640	320710	333250	377830	349850	344040	295980	313230	328357	314300	353643	317750					-0.0631215	-0.833172	0.700606	0.107031	-0.923046	0.635291	-0.0473716	-0.358003	0.826793	0.170153	-2.08684	0.431985	0.0157499	-0.395221	0.817421	-0.154403	-1.44435	0.504527	92.6692
sp	Homo sapiens	O43318	M3K7_HUMAN	MAP3K7	Mitogen-activated protein kinase kinase kinase 7	Ada2/Gcn5/Ada3 transcription activator complex [GO:0005671]; cytosol [GO:0005829]; endosome membrane [GO:0010008]; nucleus [GO:0005634]; plasma membrane [GO:0005886]	TRUE	5	118.34	22200000	337700	565740	375820	343580	399430	371110	434320	430630	458400	554050	513100	492870	426420	371373	441117	520007	0.108276	0.13187	1.40023		-0.199405	-1.83603	0.438678	0.0488852	-0.555049	0.766852	0.286255	-4.38064	0.0807957	0.24829	-2.77508	0.3197	0.48566	-7.41975	0.0157543	0.23737	-3.30905	0.192889	76.7973
sp	Homo sapiens	O43353	RIPK2_HUMAN	RIPK2	Receptor-interacting serine/threonine-protein kinase 2	cytoplasm [GO:0005737]; cytoskeleton [GO:0005856]; cytosol [GO:0005829]; protein-containing complex [GO:0032991]; vesicle [GO:0031982]	FALSE	3	136.45	18300000	952390	1024500	1005200	1002800	1163600	1221500	1471400	1388000	1421400	1212400	1191400	1204200	994030	1129300	1.42693e+06	1.20267e+06					0.184067	-3.86203	0.165218	0.521557	-13.5366	0.000724298	0.274876	-6.85047	0.0182958	0.337489	-8.53106	0.0344441	0.090808	-1.81773	0.375568	-0.246681	-5.49895	0.0613542	80.1518
sp	Homo sapiens	O43379	WDR62_HUMAN	WDR62	WD repeat-containing protein 62	centriolar satellite [GO:0034451]; centriole [GO:0005814]; centrosome [GO:0005813]; cytosol [GO:0005829]; nucleus [GO:0005634]; spindle pole [GO:0000922]	FALSE	11	175.72	37000000	2745300	2593800	2397900	2668500	2509100	3135100	3492200	3192800	3328500	1973400	2292100	2082600	2579000	2770900	3.33783e+06	2.11603e+06					0.103543	-1.53151	0.506922	0.3721	-8.30619	0.0114772	-0.285449	-6.61784	0.0211011	0.268557	-5.65252	0.098892	-0.388992	-9.25506	0.00568165	-0.65755	-15.6527	0.000581617	101.642
sp	Homo sapiens	O43390	HNRPR_HUMAN	HNRNPR	Heterogeneous nuclear ribonucleoprotein R	axon terminus [GO:0043679]; catalytic step 2 spliceosome [GO:0071013]; dendrite [GO:0030425]; endoplasmic reticulum [GO:0005783]; growth cone [GO:0030426]; nucleoplasm [GO:0005654]; nucleus [GO:0005634]; ribonucleoprotein complex [GO:1990904]; spliceosomal complex [GO:0005681]	FALSE	11	212.46	253000000	8975900	11785000	10345000	10487000	11081000	9454700	12004000	12491000	11664000	19349000	18119000	19938000	1.03686e+07	10340900	12053000	1.91353e+07					-0.00386399	-0.0361568	0.987883	0.217167	-4.7954	0.078646	0.884013	-19.5009	1.43085e-05	0.221031	-4.71168	0.144367	0.887877	-19.4441	4.2402e-05	0.666847	-14.8226	0.000768325	69.1813
sp	Homo sapiens	O43395	PRPF3_HUMAN	PRPF3	U4/U6 small nuclear ribonucleoprotein Prp3	Cajal body [GO:0015030]; cytosol [GO:0005829]; nuclear speck [GO:0016607]; nucleoplasm [GO:0005654]; nucleus [GO:0005634]; spliceosomal complex [GO:0005681]; U2-type precatalytic spliceosome [GO:0071005]; U4/U6 x U5 tri-snRNP complex [GO:0046540]	FALSE	6	106.48	31400000	3323400	3954200	4075900	2638900	2425000	2862600	2374400	2430500	2392700	3259100	3232800	3191400	3784500	2.64217e+06	2399200	3.22777e+06					-0.518381	-15.1488	0.000588358	-0.657549	-17.4827	9.23688e-05	-0.229566	-6.71298	0.0199024	-0.139168	-1.83211	0.477887	0.288815	-7.58061	0.0143701	0.427983	-10.562	0.00470735	110.287
sp	Homo sapiens	O43396	TXNL1_HUMAN	TXNL1	Thioredoxin-like protein 1	cytoplasm [GO:0005737]; cytosol [GO:0005829]; nucleus [GO:0005634]; proteasome complex [GO:0000502]	FALSE	3	116.71	35700000	411020	373500	449780	397770	463970	474130	569430	459870	487890	573620	613600	600380	411433	445290	505730	595867					0.114087	-1.95576	0.414204	0.297709	-5.75509	0.0465038	0.534331	-11.4034	0.00125581	0.183622	-2.71126	0.328444	0.420244	-8.32004	0.00951788	0.236622	-4.22263	0.12017	83.9536
sp	Homo sapiens	O43399	TPD54_HUMAN	TPD52L2	Tumor protein D54	cytoplasm [GO:0005737]; perinuclear region of cytoplasm [GO:0048471]	FALSE	2	103.23	11900000	104370	92456	92054	77184	79585	115220	123160	102150	94313	157880	286380	150530	96293.3	90663	106541	198263					-0.086922	-0.846718	0.696594	0.145901	-0.618732	0.742359	1.04191	-10.3584	0.00229524	0.232823	-1.70946	0.503195	1.12883	-11.8814	0.00139368	0.896009	-9.149	0.00956361	84.895
sp	Homo sapiens	O43402	EMC8_HUMAN	EMC8	ER membrane protein complex subunit 8	cytoplasm [GO:0005737]; cytosol [GO:0005829]; ER membrane protein complex [GO:0072546]; membrane [GO:0016020]; mitochondrion [GO:0005739]; nucleus [GO:0005634]	FALSE	2	86.08	10400000	2054100	1879800	1909400	2132900	2323100	2570200	2849900	2637400	2643500	2323100	2503700	2806700	1.94777e+06	2.34207e+06	2.71027e+06	2544500					0.265961	-4.29751	0.133801	0.476614	-9.58667	0.0056498	0.385561	-7.83446	0.0101612	0.210653	-3.80829	0.206265	0.1196	-2.23472	0.299276	-0.0910526	-0.93512	0.651539	86.0843
sp	Homo sapiens	O43405	COCH_HUMAN	COCH	Cochlin	collagen-containing extracellular matrix [GO:0062023]	TRUE	1	32.52	1890000	148810	98425	141450	79185	71735	103020	113330	80805	115600	104200	162040	132550	129562	84646.7	103245	132930					-0.614114	-6.05149	0.0554058	-0.327567	-2.78958	0.236371	0.0370278	-0.215858	0.895096	0.286547	-2.11998	0.426249	0.651142	-6.53659	0.0257433	0.364595	-3.21904	0.202172	132.163
sp	Homo sapiens	O43422	P52K_HUMAN	THAP12	52 kDa repressor of the inhibitor of the protein kinase	nucleus [GO:0005634]	FALSE	4	85.34	14200000	581340	539560	588810	686680	648170	691160	834510	742040	813520	513480	693240	644360	569903	675337	796690	617027					0.24489	-4.94951	0.0965172	0.483301	-10.8752	0.00287344	0.114616	-1.85609	0.357953	0.238412	-4.45825	0.159047	-0.130274	-2.13796	0.316217	-0.368686	-7.88203	0.017847	87.4539
sp	Homo sapiens	O43427	FIBP_HUMAN	FIBP	Acidic fibroblast growth factor intracellular-binding protein	endomembrane system [GO:0012505]; membrane [GO:0016020]; mitochondrion [GO:0005739]; nuclear speck [GO:0016607]; nucleus [GO:0005634]	FALSE	7	125.38	90800000	2485600	2530800	2285300	2691200	3264400	2812500	2651600	2850600	2978700	2627600	2660500	2720800	2433900	2922700	2.82697e+06	2.66963e+06					0.264032	-6.84588	0.0365517	0.215985	-4.82048	0.0775818	0.133372	-2.91545	0.192095	-0.0480469	-1.09942	0.648104	-0.13066	-2.66028	0.235393	-0.0826133	-1.09942	0.602052	91.608
sp	Homo sapiens	O43432	IF4G3_HUMAN	EIF4G3	Eukaryotic translation initiation factor 4 gamma 3	cytosol [GO:0005829]; eukaryotic translation initiation factor 4F complex [GO:0016281]	FALSE	26	231.5	378000000	11259000	12043000	11047000	14260000	15188000	14217000	17441000	16270000	17532000	18643000	18543000	17742000	1.14497e+07	14555000	17081000	1.83093e+07					0.346209	-12.1562	0.00274904	0.577087	-18.6943	4.81404e-05	0.677274	-20.2606	9.38339e-06	0.230878	-6.70036	0.0656627	0.331064	-9.05501	0.00633136	0.100187	-1.32622	0.537111	73.3545
sp	Homo sapiens	O43451	MGA_HUMAN	MGAM	Maltase-glucoamylase intestinal	apical plasma membrane [GO:0016324]; extracellular exosome [GO:0070062]; ficolin-1-rich granule membrane [GO:0101003]; integral component of membrane [GO:0016021]; plasma membrane [GO:0005886]; tertiary granule membrane [GO:0070821]	TRUE	15	179.34	178000000	4284600	4958500	3929700	5001300	5021200	4910900	4676400	4266800	5101100	3949600	4988600	4048000	4.39093e+06	4977800	4.68143e+06	4.32873e+06	0.314931	0.342751	1.14994		0.180981	-3.1976	0.227331	0.0924227	-1.45385	0.484513	-0.0205827	-0.127954	0.9366	-0.088558	-1.16425	0.632826	-0.201563	-3.46582	0.147668	-0.113005	-1.67027	0.449791	93.2504
sp	Homo sapiens	O43490	PROM1_HUMAN	PROM1	Prominin-1	apical plasma membrane [GO:0016324]; cell surface [GO:0009986]; cilium [GO:0005929]; endoplasmic reticulum [GO:0005783]; endoplasmic reticulum-Golgi intermediate compartment [GO:0005793]; extracellular exosome [GO:0070062]; extracellular space [GO:0005615]; integral component of plasma membrane [GO:0005887]; microvillus [GO:0005902]; microvillus membrane [GO:0031528]; photoreceptor outer segment …	TRUE	1	34.32	434000	74364	95218	85105	67629	82292	79946	84653	72140	82994	91385	115320	96706	84895.7	76622.3	79929	101137					-0.147926	-2.51325	0.313811	-0.0869719	-1.38467	0.501767	0.252548	-3.95885	0.104285	0.0609541	-0.729829	0.748553	0.400474	-7.81411	0.0126291	0.33952	-6.36597	0.0385998	86.8272
sp	Homo sapiens	O43491	E41L2_HUMAN	EPB41L2	Band 4.1-like protein 2	cell cortex region [GO:0099738]; cell junction [GO:0030054]; cytoskeleton [GO:0005856]; cytosol [GO:0005829]; extracellular exosome [GO:0070062]; focal adhesion [GO:0005925]; nucleoplasm [GO:0005654]; plasma membrane [GO:0005886]; spectrin [GO:0008091]	TRUE	10	164.9	50700000	2118200	2552000	2164400	2104700	2270800	2366500	2441700	2674500	2787000	3344600	3417500	3210700	2278200	2.24733e+06	2634400	3.32427e+06	0.000408695	0.00133831	1.4792		-0.0196803	-0.0646902	0.976408	0.20958	-4.90622	0.0739648	0.545142	-13.5452	0.00036915	0.22926	-4.75749	0.141948	0.564822	-13.4148	0.000636108	0.335562	-7.46203	0.0218154	80.8149
sp	Homo sapiens	O43493	TGON2_HUMAN	TGOLN2	Trans-Golgi network integral membrane protein 2	clathrin-coated vesicle membrane [GO:0030665]; endoplasmic reticulum lumen [GO:0005788]; endosome [GO:0005768]; Golgi apparatus [GO:0005794]; integral component of membrane [GO:0016021]; nucleoplasm [GO:0005654]; plasma membrane [GO:0005886]; trans-Golgi network [GO:0005802]; trans-Golgi network transport vesicle [GO:0030140]; transport vesicle [GO:0030133]	TRUE	21	224.44	434000000	10673000	8086100	11204000	21310000	20984000	23384000	25036000	20494000	24652000	23128000	53698000	29541000	9987700	2.18927e+07	23394000	3.54557e+07	0.00174724	0.00411685	3.54993	4	1.13222	-11.3457	0.00417573	1.22791	-12.7117	0.00111923	1.82779	-17.2829	4.55374e-05	0.0956909	-0.769721	0.735256	0.695569	-5.59938	0.0436773	0.599878	-4.12084	0.126563	47.0539
sp	Homo sapiens	O43502	RA51C_HUMAN	RAD51C	DNA repair protein RAD51 homolog 3	cell junction [GO:0030054]; cytoplasm [GO:0005737]; cytosol [GO:0005829]; intracellular membrane-bounded organelle [GO:0043231]; mitochondrion [GO:0005739]; nucleoplasm [GO:0005654]; nucleus [GO:0005634]; perinuclear region of cytoplasm [GO:0048471]; Rad51B-Rad51C-Rad51D-XRCC2 complex [GO:0033063]; Rad51C-XRCC3 complex [GO:0033065]; replication fork [GO:0005657]	FALSE	1	50.51	657000	90349	99665	94838	41648	56955	49244	51987	45329	47594	37898	35868	35273	94950.7	49282.3	48303.3	36346.3					-0.946108	-19.0852	7.7896e-05	-0.975055	-19.0852	3.8948e-05	-1.38537	-25.0147	9.50498e-07	-0.0289478	0	1	-0.439261	-8.61682	0.00810183	-0.410313	-8.61682	0.0124113	157.896
sp	Homo sapiens	O43505	B4GA1_HUMAN	B4GAT1	Beta-1 4-glucuronyltransferase 1	extracellular exosome [GO:0070062]; Golgi apparatus [GO:0005794]; Golgi membrane [GO:0000139]; integral component of Golgi membrane [GO:0030173]	TRUE	2	68.52	17600000	170520	111110	178550	370130	375510	390280	460160	387930	401470	394540	470920	361970	153393	378640	416520	409143	0.00010062	0.000488851	2.71537	3	1.30359	-19.8492	5.34557e-05	1.44115	-21.3372	1.20406e-05	1.41537	-20.9752	6.56206e-06	0.137559	-1.33043	0.592125	0.11178	-0.934696	0.613807	-0.0257794	-0.268476	0.880307	50.238
sp	Homo sapiens	O43520	AT8B1_HUMAN	ATP8B1	Phospholipid-transporting ATPase IC	apical plasma membrane [GO:0016324]; brush border membrane [GO:0031526]; cytosol [GO:0005829]; endoplasmic reticulum [GO:0005783]; Golgi apparatus [GO:0005794]; integral component of plasma membrane [GO:0005887]; nuclear body [GO:0016604]; nucleoplasm [GO:0005654]; plasma membrane [GO:0005886]; stereocilium [GO:0032420]; trans-Golgi network [GO:0005802]	TRUE	15	239.5	282000000	5734600	5667700	5400600	5375400	5417000	5230200	5167500	4978700	5260300	5492700	6142800	5456900	5.60097e+06	5.34087e+06	5135500	5.69747e+06	0.0527388	0.0698382	1.10943		-0.068602	-1.48904	0.517508	-0.125171	-4.3575	0.0998062	0.0246447	-0.33516	0.837773	-0.0565691	-2.04275	0.440074	0.0932467	-2.04275	0.332807	0.149816	-5.06648	0.0778802	105.344
sp	Homo sapiens	O43524	FOXO3_HUMAN	FOXO3	Forkhead box protein O3	cytoplasm [GO:0005737]; cytosol [GO:0005829]; mitochondrial matrix [GO:0005759]; mitochondrial outer membrane [GO:0005741]; nuclear chromatin [GO:0000790]; nucleoplasm [GO:0005654]; nucleus [GO:0005634]; protein-containing complex [GO:0032991]	FALSE	1	49.41	1020000	24816	29463	22743	40676	32704	30458	30956	16082	33749	16006	27595	21718	25674	34612.7	26929	21773					0.430992	-3.06998	0.242166	0.0688526	-0.0719795	0.965906	-0.237768	-1.56656	0.422395	-0.362139	-3.22144	0.264202	-0.66876	-5.65259	0.042432	-0.30662	-1.44398	0.504548	91.0774
sp	Homo sapiens	O43541	SMAD6_HUMAN	SMAD6	Mothers against decapentaplegic homolog 6	cytoplasm [GO:0005737]; cytosol [GO:0005829]; Golgi apparatus [GO:0005794]; heteromeric SMAD protein complex [GO:0071144]; nuclear body [GO:0016604]; nuclear chromatin [GO:0000790]; nucleoplasm [GO:0005654]; nucleus [GO:0005634]; protein-containing complex [GO:0032991]	FALSE	1	45.86	1240000	19266	27523	22428	22974	17737	23318	21285	26007	24522	25395	21817	24725	23072.3	21343	23938	23979					-0.112401	-1.15592	0.604916	0.0531387	-0.780642	0.683728	0.0556076	-0.43604	0.793354	0.16554	-2.30739	0.392941	0.168009	-1.82193	0.374708	0.00246887	-0.275806	0.876828	83.4637
sp	Homo sapiens	O43542	XRCC3_HUMAN	XRCC3	DNA repair protein XRCC3	cytoplasm [GO:0005737]; cytosol [GO:0005829]; mitochondrion [GO:0005739]; nuclear chromosome, telomeric region [GO:0000784]; nucleoplasm [GO:0005654]; nucleus [GO:0005634]; perinuclear region of cytoplasm [GO:0048471]; Rad51C-XRCC3 complex [GO:0033065]; replication fork [GO:0005657]	FALSE	3	84.43	7370000	282600	277650	293020	253000	244410	266630	266630	238750	223500	188750	228070	188070	284423	254680	242960	201630					-0.159354	-3.91432	0.160921	-0.227321	-4.81474	0.0778642	-0.49633	-12.9244	0.000524376	-0.0679669	-0.443084	0.846145	-0.336975	-7.77393	0.0129057	-0.269009	-6.83715	0.030171	114.914
sp	Homo sapiens	O43556	SGCE_HUMAN	SGCE	Epsilon-sarcoglycan	cytoskeleton [GO:0005856]; dendrite membrane [GO:0032590]; dystrophin-associated glycoprotein complex [GO:0016010]; Golgi apparatus [GO:0005794]; integral component of plasma membrane [GO:0005887]; plasma membrane [GO:0005886]; sarcoglycan complex [GO:0016012]; sarcolemma [GO:0042383]	TRUE	2	68.17	20600000	1144000	1022300	1113000	637710	780560	679410	767730	697900	739930	918790	985260	924200	1093100	699227	735187	942750	0.000106865	0.000510315	1.5633	1	-0.644593	-15.5009	0.000483489	-0.572243	-13.93	0.000595684	-0.213478	-4.79861	0.0630003	0.0723504	-1.02551	0.667049	0.431115	-9.90563	0.00394861	0.358765	-8.0235	0.016594	131.863
sp	Homo sapiens	O43570	CAH12_HUMAN	CA12	Carbonic anhydrase 12	integral component of membrane [GO:0016021]; plasma membrane [GO:0005886]	TRUE	20	302.28	29000000000	399410000	362140000	342830000	283820000	318570000	245210000	172320000	139760000	166100000	257940000	342930000	251230000	3.68127e+08	2.82533e+08	1.59393e+08	2.84033e+08	0.000278145	0.00100366	2.30955	1	-0.381781	-6.38746	0.0468024	-1.20761	-19.5518	3.0559e-05	-0.374142	-6.38746	0.0243059	-0.82583	-13.5486	0.00629128	0.00763916	-5.76617e-14	1	0.833469	-13.5486	0.00129572	146.025
sp	Homo sapiens	O43572	AKA10_HUMAN	AKAP10	A-kinase anchor protein 10 mitochondrial	cytosol [GO:0005829]; mitochondrion [GO:0005739]; plasma membrane [GO:0005886]; protein-containing complex [GO:0032991]	TRUE	7	148.2	63400000	2785300	3261500	3178800	3780900	4120400	4093900	5174100	4920900	5229900	3416700	4012400	3737200	3075200	3998400	5108300	3722100	9.02517e-05	0.000460494	1.66113	3	0.378743	-11.2422	0.00436075	0.732163	-18.6525	4.93994e-05	0.275437	-6.234	0.0266126	0.35342	-7.64233	0.0476878	-0.103306	-3.60634	0.136322	-0.456726	-12.5177	0.0019631	70.0528
sp	Homo sapiens	O43592	XPOT_HUMAN	XPOT	Exportin-T	cytoplasm [GO:0005737]; cytosol [GO:0005829]; nuclear matrix [GO:0016363]; nucleoplasm [GO:0005654]	FALSE	18	264.87	334000000	10322000	8922500	9179300	12669000	12286000	13331000	14933000	14202000	14066000	9304100	9849600	11535000	9474600	12762000	1.44003e+07	1.02296e+07					0.429717	-10.4333	0.00636251	0.603965	-13.527	0.000726358	0.110608	-1.53785	0.429066	0.174248	-2.12435	0.425404	-0.319109	-7.83575	0.0124798	-0.493357	-11.1486	0.00356661	88.097
sp	Homo sapiens	O43598	DNPH1_HUMAN	DNPH1	2'-deoxynucleoside 5'-phosphate N-hydrolase 1	cytosol [GO:0005829]; extracellular exosome [GO:0070062]; nucleus [GO:0005634]	TRUE	1	66.74	67100000	205420	169480	176590	261780	287670	232820	310000	314000	298460	506250	442550	389490	183830	260757	307487	446097					0.504332	-11.2956	0.0042584	0.742152	-16.9606	0.00012085	1.27898	-25.2133	8.87495e-07	0.23782	-5.22008	0.117906	0.774652	-17.4034	0.000101611	0.536833	-11.8472	0.00263951	68.5779
sp	Homo sapiens	O43615	TIM44_HUMAN	TIMM44	Mitochondrial import inner membrane translocase subunit TIM44	mitochondrial inner membrane [GO:0005743]; mitochondrial matrix [GO:0005759]; mitochondrion [GO:0005739]	FALSE	14	232.61	425000000	11787000	12557000	12412000	13669000	14478000	13902000	15543000	15654000	15415000	16628000	13890000	15207000	12252000	1.40163e+07	1.55373e+07	1.52417e+07					0.194092	-3.90153	0.162031	0.342722	-9.09431	0.00733645	0.315003	-8.05779	0.00886057	0.14863	-3.72399	0.214266	0.120912	-2.7751	0.22035	-0.0277182	-0.504748	0.810305	82.6472
sp	Homo sapiens	O43617	TPPC3_HUMAN	TRAPPC3	Trafficking protein particle complex subunit 3	cis-Golgi network membrane [GO:0033106]; cytosol [GO:0005829]; endoplasmic reticulum [GO:0005783]; Golgi apparatus [GO:0005794]; Golgi membrane [GO:0000139]; TRAPP complex [GO:0030008]	FALSE	1	31.89	8680000	139490	136750	173720	122450	97283	98049	125140	128850	113490	156460	165120	151210	149987	105927	122493	157597					-0.501759	-10.1269	0.00733301	-0.292131	-5.34759	0.0581025	0.0714028	-1.02588	0.571921	0.209628	-3.33412	0.251596	0.573162	-11.9177	0.00137078	0.363534	-7.27002	0.0242093	104.096
sp	Homo sapiens	O43657	TSN6_HUMAN	TSPAN6	Tetraspanin-6	extracellular exosome [GO:0070062]; integral component of plasma membrane [GO:0005887]	TRUE	2	65.46	29100000	3767000	2366300	3112900	3843400	3928100	3466400	4118000	4340800	4182800	5804800	5495400	6592300	3.08207e+06	3.74597e+06	4.21387e+06	5.96417e+06	0.00151596	0.00373134	1.93512	4	0.28144	-4.47152	0.122157	0.451247	-7.71472	0.0158562	0.952423	-16.9059	5.56075e-05	0.169807	-1.99299	0.448006	0.670983	-11.9288	0.00136371	0.501176	-8.84078	0.0111255	88.6037
sp	Homo sapiens	O43660	PLRG1_HUMAN	PLRG1	Pleiotropic regulator 1	catalytic step 2 spliceosome [GO:0071013]; Cul4-RING E3 ubiquitin ligase complex [GO:0080008]; fibrillar center [GO:0001650]; nuclear membrane [GO:0031965]; nuclear speck [GO:0016607]; nucleoplasm [GO:0005654]; nucleus [GO:0005634]; Prp19 complex [GO:0000974]; U2-type catalytic step 2 spliceosome [GO:0071007]	FALSE	1	58.97	523000	119570	231950	151400	67756	66666	63938	68612	83592	94381	95310	85235	87792	167640	66120	82195	89445.7					-1.34221	-16.6991	0.00027518	-1.02824	-12.6472	0.00115422	-0.906283	-11.3013	0.001332	0.313964	-3.45274	0.238824	0.435925	-4.86983	0.0662322	0.121961	-0.754765	0.710551	117.977
sp	Homo sapiens	O43663	PRC1_HUMAN	PRC1	Protein regulator of cytokinesis 1	chromosome [GO:0005694]; contractile ring [GO:0070938]; cytoplasm [GO:0005737]; cytosol [GO:0005829]; intercellular bridge [GO:0045171]; microtubule cytoskeleton [GO:0015630]; midbody [GO:0030496]; mitotic spindle midzone [GO:1990023]; nucleoplasm [GO:0005654]; nucleus [GO:0005634]; plasma membrane [GO:0005886]; spindle [GO:0005819]; spindle microtubule [GO:0005876]; spindle pole [GO:0000922]	TRUE	4	127.73	40300000	2380100	4007900	1850900	1163100	1602500	3241100	1683100	1524400	1220600	1022200	936440	1129800	2746300	2.00223e+06	1.47603e+06	1029480	0.054149	0.0713269	2.66766		-0.455879	-2.95603	0.254875	-0.895764	-5.25234	0.0612604	-1.41557	-9.27754	0.00430669	-0.439885	-1.36838	0.58217	-0.959694	-4.89534	0.0651696	-0.519809	-2.64039	0.273653	131.243
sp	Homo sapiens	O43670	ZN207_HUMAN	ZNF207	BUB3-interacting and GLEBS motif-containing protein ZNF207	condensed chromosome kinetochore [GO:0000777]; cytoplasm [GO:0005737]; kinetochore [GO:0000776]; microtubule [GO:0005874]; nucleolus [GO:0005730]; nucleoplasm [GO:0005654]; nucleus [GO:0005634]; spindle [GO:0005819]; spindle matrix [GO:1990047]	FALSE	10	205.86	429000000	4937100	4773200	5121700	7374700	7156900	6427200	7896300	6936500	7575100	9107500	9134000	8861300	4944000	6.98627e+06	7469300	9.03427e+06					0.498843	-13.761	0.00121227	0.595294	-16.285	0.000170847	0.869729	-21.8854	4.09112e-06	0.0964513	-1.88917	0.467458	0.370886	-9.84883	0.00406636	0.274434	-6.75733	0.0313914	69.4539
sp	Homo sapiens	O43674	NDUB5_HUMAN	NDUFB5	NADH dehydrogenase [ubiquinone] 1 beta subcomplex subunit 5 mitochondrial	integral component of membrane [GO:0016021]; mitochondrial inner membrane [GO:0005743]; mitochondrial respiratory chain complex I [GO:0005747]; mitochondrion [GO:0005739]; nucleoplasm [GO:0005654]	FALSE	2	65.28	14100000	1913200	1916500	1917400	1689900	1760800	1762200	1563600	1598000	1516400	2034200	2182500	2271800	1915700	1.73763e+06	1.55933e+06	2.16283e+06					-0.140748	-5.72202	0.0652752	-0.296942	-10.767	0.00305623	0.175051	-5.21184	0.0491648	-0.156194	-3.60884	0.224296	0.315799	-12.2957	0.0011326	0.471993	-16.5287	0.000398949	103.76
sp	Homo sapiens	O43681	ASNA_HUMAN	ASNA1	ATPase ASNA1	cytoplasm [GO:0005737]; endoplasmic reticulum membrane [GO:0005789]; extracellular exosome [GO:0070062]; GET complex [GO:0043529]; nucleolus [GO:0005730]; nucleoplasm [GO:0005654]	TRUE	3	86.01	36800000	461650	1119300	560930	427360	477880	502240	754130	594620	660870	722260	693750	609280	713960	469160	669873	675097	0.278015	0.305855	1.52178		-0.605763	-3.95907	0.157834	-0.0919549	-0.00897528	0.996596	-0.0807492	-0.171497	0.915591	0.513808	-3.9794	0.191481	0.525014	-4.33086	0.0903119	0.0112058	-0.16156	0.935187	73.0433
sp	Homo sapiens	O43683	BUB1_HUMAN	BUB1	Mitotic checkpoint serine/threonine-protein kinase BUB1	condensed chromosome kinetochore [GO:0000777]; condensed nuclear chromosome kinetochore [GO:0000778]; condensed nuclear chromosome outer kinetochore [GO:0000942]; cytosol [GO:0005829]; kinetochore [GO:0000776]; membrane [GO:0016020]; nucleoplasm [GO:0005654]	FALSE	1	65.57	242000	50948	37715	33631	20869	21116	25085	27633	21152	24258	32522	36451	23687	40764.7	22356.7	24347.7	30886.7					-0.866614	-10.417	0.00638065	-0.743536	-8.07028	0.0130574	-0.400335	-3.78445	0.115526	0.123078	-1.35645	0.585494	0.466279	-5.16714	0.0557846	0.343201	-2.89494	0.23886	172.186
sp	Homo sapiens	O43684	BUB3_HUMAN	BUB3	Mitotic checkpoint protein BUB3	bub1-bub3 complex [GO:1990298]; condensed chromosome kinetochore [GO:0000777]; cytosol [GO:0005829]; kinetochore [GO:0000776]; mitotic checkpoint complex [GO:0033597]; nucleoplasm [GO:0005654]	FALSE	10	200.99	394000000	4674900	5213400	5314300	6671900	6853700	6166700	7139700	7672600	6639000	10844000	8787200	9451400	5.06753e+06	6564100	7.15043e+06	9694200					0.373314	-9.93976	0.00801068	0.496747	-13.4904	0.000740926	0.935838	-22.4007	3.16067e-06	0.123433	-2.51645	0.358375	0.562525	-14.4251	0.000392286	0.439091	-10.9902	0.00385355	65.6673
sp	Homo sapiens	O43688	PLPP2_HUMAN	PLPP2	Phospholipid phosphatase 2	caveola [GO:0005901]; early endosome [GO:0005769]; early endosome membrane [GO:0031901]; endoplasmic reticulum [GO:0005783]; endoplasmic reticulum membrane [GO:0005789]; integral component of membrane [GO:0016021]; integral component of plasma membrane [GO:0005887]; plasma membrane [GO:0005886]	TRUE	9	173.09	2260000000	17170000	14608000	16279000	13730000	14251000	13132000	10621000	9144300	11160000	8820000	9904400	8777700	16019000	1.37043e+07	1.03084e+07	9.16737e+06	7.44702e-05	0.000398246	1.74739	2	-0.225152	-4.87812	0.100064	-0.635959	-15.9209	0.000207531	-0.805205	-18.6212	2.23031e-05	-0.410807	-10.3394	0.0189548	-0.580053	-13.6663	0.000551668	-0.169246	-2.33844	0.318465	139.596
sp	Homo sapiens	O43707	ACTN4_HUMAN	ACTN4	Alpha-actinin-4	brush border [GO:0005903]; cell-cell junction [GO:0005911]; cortical cytoskeleton [GO:0030863]; cytoplasm [GO:0005737]; cytosol [GO:0005829]; extracellular exosome [GO:0070062]; extracellular region [GO:0005576]; extracellular space [GO:0005615]; focal adhesion [GO:0005925]; neuron projection [GO:0043005]; nuclear body [GO:0016604]; nucleus [GO:0005634]; perinuclear region of cytoplasm [GO:004847…	TRUE	27	335.88	874000000	12696000	15580000	14794000	10894000	12476000	13013000	17410000	18379000	16000000	26205000	25185000	26549000	1.43567e+07	1.21277e+07	17263000	2.59797e+07	1.50544e-05	0.000135998	2.14218	5	-0.243419	-4.72938	0.107958	0.265962	-5.74987	0.0466357	0.855662	-19.6809	1.30181e-05	0.509381	-11.878	0.0114298	1.09908	-23.4431	9.69354e-06	0.5897	-14.2527	0.000979152	72.8326
sp	Homo sapiens	O43719	HTSF1_HUMAN	HTATSF1	HIV Tat-specific factor 1	nucleoplasm [GO:0005654]; nucleus [GO:0005634]; U2 snRNP [GO:0005686]; U2-type spliceosomal complex [GO:0005684]	FALSE	5	132.65	46200000	2122400	1924400	2363600	2331200	2391800	2755800	2399600	2293800	2483900	2871500	2814300	2659100	2136800	2.49293e+06	2.39243e+06	2.78163e+06					0.222392	-4.97048	0.0957475	0.163027	-2.46219	0.283112	0.38048	-8.57801	0.00650334	-0.0593656	-1.57504	0.533354	0.158088	-2.28145	0.291661	0.217454	-4.75765	0.0909196	86.595
sp	Homo sapiens	O43739	CYH3_HUMAN	CYTH3	Cytohesin-3	adherens junction [GO:0005912]; bicellular tight junction [GO:0005923]; cytosol [GO:0005829]; extrinsic component of cytoplasmic side of plasma membrane [GO:0031234]; Golgi membrane [GO:0000139]; nucleoplasm [GO:0005654]; plasma membrane [GO:0005886]; ruffle [GO:0001726]	TRUE	2	60.94	5320000	258820	304210	258020	260660	228590	249260	221940	299190	266410	372480	270020	316750	273683	246170	262513	319750	0.154437	0.18107	1.2989		-0.152853	-2.14946	0.377251	-0.0601169	-0.727457	0.701565	0.224437	-2.54229	0.238981	0.0927357	-1.08638	0.65178	0.377289	-5.8005	0.0391184	0.284554	-3.83675	0.146895	93.9356
sp	Homo sapiens	O43741	AAKB2_HUMAN	PRKAB2	5'-AMP-activated protein kinase subunit beta-2	cytoplasm [GO:0005737]; cytosol [GO:0005829]; nucleoplasm [GO:0005654]; nucleotide-activated protein kinase complex [GO:0031588]; nucleus [GO:0005634]	FALSE	1	31.87	1660000	122580	130870	127270	110890	120930	144830	153140	145370	169760	149660	149270	137450	126907	125550	156090	145460					-0.0155058	-0.416334	0.842188	0.29861	-5.67599	0.0485854	0.196855	-3.91137	0.107178	0.314116	-6.56147	0.0691078	0.21236	-4.76215	0.0705549	-0.101756	-0.954037	0.64619	88.5044
sp	Homo sapiens	O43747	AP1G1_HUMAN	AP1G1	AP-1 complex subunit gamma-1	AP-1 adaptor complex [GO:0030121]; clathrin-coated vesicle [GO:0030136]; clathrin-coated vesicle membrane [GO:0030665]; cytoplasm [GO:0005737]; cytoplasmic vesicle membrane [GO:0030659]; cytosol [GO:0005829]; Golgi apparatus [GO:0005794]; Golgi membrane [GO:0000139]; intracellular membrane-bounded organelle [GO:0043231]; lysosomal membrane [GO:0005765]; membrane [GO:0016020]; recycling endosome […	FALSE	20	218.23	328000000	7625800	6991400	7167500	7775200	7825700	8645100	8743700	8533700	8709700	7652700	7525600	7976700	7.26157e+06	8082000	8.66237e+06	7.71833e+06					0.154432	-2.79526	0.275407	0.25448	-7.29832	0.0200178	0.0880085	-1.00896	0.577098	0.100049	-3.17836	0.268904	-0.066423	-1.29924	0.504542	-0.166472	-5.40149	0.0648563	96.151
sp	Homo sapiens	O43760	SNG2_HUMAN	SYNGR2	Synaptogyrin-2	extracellular exosome [GO:0070062]; integral component of membrane [GO:0016021]; lipid droplet [GO:0005811]; neuromuscular junction [GO:0031594]; synaptic vesicle membrane [GO:0030672]	TRUE	4	103.79	149000000	1967900	1870800	2212200	1719900	1764100	1786500	1932200	1887100	1975100	2127700	2909000	2579300	2.01697e+06	1.75683e+06	1.93147e+06	2.53867e+06	0.00739056	0.0130801	1.44502		-0.19921	-2.69843	0.288587	-0.0624905	-0.952211	0.625427	0.331884	-5.82745	0.0339905	0.136719	-1.2831	0.601799	0.531094	-9.9028	0.00395358	0.394374	-7.63796	0.0200944	95.4835
sp	Homo sapiens	O43761	SNG3_HUMAN	SYNGR3	Synaptogyrin-3	integral component of membrane [GO:0016021]; neuromuscular junction [GO:0031594]; synaptic vesicle [GO:0008021]; synaptic vesicle membrane [GO:0030672]	FALSE	3	101.67	59500000	1012100	1110600	994570	973720	983890	944560	958460	912870	1058900	880330	972950	924150	1039090	967390	976743	925810					-0.103151	-1.69088	0.470179	-0.0892692	-0.982552	0.616336	-0.166533	-3.39659	0.144382	0.0138819	-0.485117	0.839304	-0.0633815	-1.09552	0.563492	-0.0772634	-1.82283	0.418097	103.565
sp	Homo sapiens	O43765	SGTA_HUMAN	SGTA	Small glutamine-rich tetratricopeptide repeat-containing protein alpha	cytoplasm [GO:0005737]; cytosol [GO:0005829]; extrinsic component of synaptic vesicle membrane [GO:0098850]; membrane [GO:0016020]; nucleus [GO:0005634]; TRC complex [GO:0072380]	FALSE	2	73.47	8380000	163690	184450	154390	154740	215060	222150	230560	269520	227710	351770	373820	333340	167510	197317	242597	352977					0.236266	-3.02612	0.246099	0.534313	-8.60797	0.0096897	1.07533	-17.3617	4.36595e-05	0.298047	-4.15756	0.178634	0.83906	-13.8299	0.000510831	0.541013	-8.56332	0.0127367	68.1758
sp	Homo sapiens	O43772	MCAT_HUMAN	SLC25A20	Mitochondrial carnitine/acylcarnitine carrier protein	cytosol [GO:0005829]; integral component of membrane [GO:0016021]; mitochondrial inner membrane [GO:0005743]; mitochondrion [GO:0005739]	FALSE	6	99.52	60900000	2869800	2682600	2817900	2778400	2970700	2683500	2748700	2470800	2826800	2293500	2703000	2307200	2790100	2.81087e+06	2682100	2.43457e+06					0.0106982	-0.179983	0.931067	-0.0569538	-1.29604	0.526352	-0.196652	-4.40304	0.0797141	-0.067652	-1.58852	0.530125	-0.20735	-4.79932	0.0689251	-0.139698	-2.30152	0.325411	107.106
sp	Homo sapiens	O43776	SYNC_HUMAN	NARS1	Asparagine--tRNA ligase cytoplasmic	cytoplasm [GO:0005737]; cytosol [GO:0005829]; extracellular exosome [GO:0070062]	TRUE	9	175.24	68800000	1701400	1989300	1870800	1332300	1552600	1622400	1989100	1848300	1871700	2575500	2438000	2418900	1.85383e+06	1.50243e+06	1.90303e+06	2.47747e+06	0.000175955	0.0007272	1.64897	5	-0.303211	-6.96676	0.0343115	0.0377893	-0.323854	0.856219	0.418354	-10.1763	0.0025497	0.341	-7.67262	0.0471306	0.721565	-17.3711	0.000102564	0.380565	-9.49791	0.00795409	87.9644
sp	Homo sapiens	O43795	MYO1B_HUMAN	MYO1B	Unconventional myosin-Ib	actin cytoskeleton [GO:0015629]; actin filament [GO:0005884]; apical part of cell [GO:0045177]; brush border [GO:0005903]; cell periphery [GO:0071944]; cytoplasm [GO:0005737]; early endosome [GO:0005769]; endosome membrane [GO:0010008]; extracellular exosome [GO:0070062]; filopodium [GO:0030175]; microvillus [GO:0005902]; myosin complex [GO:0016459]; perinuclear region of cytoplasm [GO:0048471]; …	TRUE	41	368.64	4290000000	80852000	74928000	78607000	71423000	76187000	81215000	85317000	82433000	84602000	69515000	71093000	73485000	78129000	76275000	8.41173e+07	7.13643e+07	0.00780128	0.0136446	1.1787		-0.0346479	-0.319456	0.87896	0.106545	-1.67192	0.432755	-0.130655	-2.80565	0.204981	0.141193	-2.21759	0.408467	-0.0960071	-2.21759	0.301922	-0.2372	-5.49562	0.0614429	104.364
sp	Homo sapiens	O43805	SSNA1_HUMAN	SSNA1	Sjoegren syndrome nuclear autoantigen 1	centrosome [GO:0005813]; ciliary basal body [GO:0036064]; cytosol [GO:0005829]; nucleus [GO:0005634]	FALSE	1	31.76	844000	113870	116680	94123	63377	72944	73248	106410	64382	77482	104180	126460	105280	108224	69856.3	82758	111973					-0.631562	-8.3627	0.0173766	-0.387054	-5.49277	0.0537083	0.0491303	-0.458052	0.784361	0.244508	-1.69294	0.506437	0.680692	-9.30968	0.00552744	0.436185	-6.45577	0.0368254	122.174
sp	Homo sapiens	O43809	CPSF5_HUMAN	NUDT21	Cleavage and polyadenylation specificity factor subunit 5	centriolar satellite [GO:0034451]; centrosome [GO:0005813]; cytoplasm [GO:0005737]; mRNA cleavage and polyadenylation specificity factor complex [GO:0005847]; mRNA cleavage factor complex [GO:0005849]; nuclear body [GO:0016604]; nucleoplasm [GO:0005654]; nucleus [GO:0005634]; paraspeckles [GO:0042382]	FALSE	3	81.57	16700000	330270	402870	505530	378330	419410	419330	484470	569090	388600	1002700	746480	995290	412890	405690	480720	914823					-0.0253797	-0.191428	0.926454	0.219439	-2.78618	0.236767	1.14774	-16.2011	8.17595e-05	0.244819	-2.41709	0.375014	1.17312	-15.8663	0.000201763	0.928296	-12.7263	0.00180232	59.6661
sp	Homo sapiens	O43813	LANC1_HUMAN	LANCL1	Glutathione S-transferase LANCL1	cytoplasm [GO:0005737]; integral component of plasma membrane [GO:0005887]; plasma membrane [GO:0005886]	TRUE	2	54.61	16300000	585970	659650	584540	566900	515780	523090	551710	535030	595410	498950	546900	487730	610053	535257	560717	511193	0.03338	0.046816	1.19339		-0.188705	-4.91732	0.0981671	-0.121663	-2.98221	0.212419	-0.255066	-6.96836	0.0170398	0.0670411	-1.11485	0.645025	-0.0663618	-1.11485	0.557564	-0.133403	-2.70031	0.265273	105.713
sp	Homo sapiens	O43815	STRN_HUMAN	STRN	Striatin	bicellular tight junction [GO:0005923]; cytoplasm [GO:0005737]; dendrite [GO:0030425]; dendritic spine [GO:0043197]; FAR/SIN/STRIPAK complex [GO:0090443]; membrane [GO:0016020]; neuronal cell body [GO:0043025]; postsynaptic density [GO:0014069]; postsynaptic membrane [GO:0045211]	FALSE	2	85.07	10400000	501080	496820	441000	397150	449620	578160	719480	511060	536460	571390	616330	554750	479633	474977	589000	580823					-0.0140753	-0.354459	0.86559	0.296336	-3.94809	0.125093	0.276167	-3.36652	0.146947	0.310411	-4.68344	0.145844	0.290243	-4.08076	0.104045	-0.0201682	-0.28431	0.873298	94.3461
sp	Homo sapiens	O43818	U3IP2_HUMAN	RRP9	U3 small nucleolar RNA-interacting protein 2	box C/D snoRNP complex [GO:0031428]; nucleolus [GO:0005730]; nucleoplasm [GO:0005654]; small-subunit processome [GO:0032040]	FALSE	2	62.54	8050000	250580	289380	345930	330460	274700	354790	318490	309580	325210	384730	439460	409540	295297	319983	317760	411243					0.115832	-1.57229	0.497505	0.105772	-1.57229	0.454221	0.477827	-9.44304	0.00390721	-0.0100592	0	1	0.361996	-6.75587	0.0226969	0.372055	-6.75587	0.0313914	74.5617
sp	Homo sapiens	O43819	SCO2_HUMAN	SCO2	Protein SCO2 homolog mitochondrial	integral component of mitochondrial inner membrane [GO:0031305]; mitochondrial matrix [GO:0005759]; mitochondrion [GO:0005739]; myofibril [GO:0030016]	FALSE	3	94.3	14400000	625800	625920	674810	564340	589680	673810	560180	581720	665880	539370	581490	549710	642177	609277	602593	556857					-0.0758728	-1.36199	0.548615	-0.0917855	-2.87004	0.226335	-0.205664	-5.56291	0.0396727	-0.0159128	-1.00636	0.672071	-0.129791	-3.24415	0.168505	-0.113879	-1.66745	0.45037	103.828
sp	Homo sapiens	O43823	AKAP8_HUMAN	AKAP8	A-kinase anchor protein 8	condensed chromosome [GO:0000793]; female pronucleus [GO:0001939]; Golgi apparatus [GO:0005794]; membrane [GO:0016020]; mitochondrion [GO:0005739]; nuclear matrix [GO:0016363]; nucleolus [GO:0005730]; nucleoplasm [GO:0005654]; nucleus [GO:0005634]	FALSE	11	221.95	142000000	4446700	4194800	4071700	5378400	5028900	5368100	5954800	5456900	6295400	3650300	4313700	4457600	4.23773e+06	5.25847e+06	5.90237e+06	4.14053e+06					0.311349	-8.19501	0.0187169	0.478001	-11.9275	0.00163958	-0.0334762	-1.0493	0.564866	0.166651	-2.52748	0.357161	-0.344826	-10.106	0.00353041	-0.511477	-13.6499	0.00123506	91.0318
sp	Homo sapiens	O43824	GTPB6_HUMAN	GTPBP6	Putative GTP-binding protein 6	cytoplasm [GO:0005737]	FALSE	8	173.93	42700000	1703000	2373700	1871900	2097000	2070900	2219300	1890500	2137200	2034100	1911100	1749500	1994700	1.98287e+06	2.12907e+06	2020600	1885100					0.102633	-2.02918	0.399517	0.0271961	-0.907449	0.640392	-0.0729466	-0.704251	0.683235	-0.0754374	-0.804184	0.724845	-0.17558	-3.22497	0.170232	-0.100143	-1.89767	0.403788	84.9627
sp	Homo sapiens	O43826	G6PT1_HUMAN	SLC37A4	Glucose-6-phosphate exchanger SLC37A4	endoplasmic reticulum [GO:0005783]; endoplasmic reticulum membrane [GO:0005789]; integral component of endoplasmic reticulum membrane [GO:0030176]; integral component of membrane [GO:0016021]; membrane [GO:0016020]	FALSE	3	111.32	54000000	2351100	2207100	2270200	2935600	2872800	3003200	3045900	2751400	3142300	2266000	3119300	2621000	2.27613e+06	2937200	2.97987e+06	2.66877e+06					0.367856	-7.4796	0.0268707	0.388663	-7.4796	0.0180715	0.229588	-3.52692	0.13443	0.0208063	-3.60385e-14	1	-0.138268	-2.62153	0.240739	-0.159075	-2.62153	0.276224	86.581
sp	Homo sapiens	O43837	IDH3B_HUMAN	IDH3B	Isocitrate dehydrogenase [NAD] subunit beta mitochondrial	mitochondrial matrix [GO:0005759]; mitochondrion [GO:0005739]; nucleus [GO:0005634]	FALSE	8	153.98	300000000	4697200	4822800	4015100	4530300	5019900	4921300	4993000	5019900	4808600	5303600	4720700	4745600	4511700	4.82383e+06	4940500	4923300					0.0965089	-1.64071	0.48135	0.130986	-3.19844	0.188529	0.125955	-2.38297	0.262609	0.034477	-0.996785	0.673381	0.0294456	-0.444594	0.801812	-0.0050314	-0.444594	0.825261	97.8617
sp	Homo sapiens	O43847	NRDC_HUMAN	NRDC	Nardilysin	cell surface [GO:0009986]; cytosol [GO:0005829]; mitochondrion [GO:0005739]	TRUE	8	136.34	59000000	4553800	4831900	5101100	4339200	4413500	5791500	6006500	6331800	6323500	5725400	6346000	6025700	4.82893e+06	4.84807e+06	6220600	6.03237e+06	0.0122895	0.0198448	1.28819		0.00570499	-0.0131524	0.994428	0.365349	-6.69836	0.0275677	0.32102	-5.18957	0.0498305	0.359644	-6.7299	0.0648152	0.315315	-5.22063	0.0540585	-0.0443296	-0.769225	0.706341	83.0608
sp	Homo sapiens	O43852	CALU_HUMAN	CALU	Calumenin	endoplasmic reticulum [GO:0005783]; endoplasmic reticulum lumen [GO:0005788]; endoplasmic reticulum membrane [GO:0005789]; extracellular region [GO:0005576]; Golgi apparatus [GO:0005794]; melanosome [GO:0042470]; membrane [GO:0016020]; sarcoplasmic reticulum lumen [GO:0033018]	TRUE	13	198.44	383000000	3722200	3265800	3515100	4685600	5233900	4658800	4276400	4412700	4264800	7687700	8313900	8131300	3.50103e+06	4.85943e+06	4.31797e+06	8044300	2.8449e-07	1.47538e-05	2.29769	5	0.473007	-15.7323	0.000436249	0.302571	-9.59038	0.00564676	1.20019	-29.7974	1.10839e-07	-0.170436	-5.4101	0.109194	0.727179	-20.9172	2.32599e-05	0.897615	-24.8267	1.19709e-05	71.8477
sp	Homo sapiens	O43854	EDIL3_HUMAN	EDIL3	EGF-like repeat and discoidin I-like domain-containing protein 3	collagen-containing extracellular matrix [GO:0062023]; extracellular exosome [GO:0070062]; extracellular vesicle [GO:1903561]	TRUE	9	151.07	82000000	3561900	2752400	3131300	3076800	3093900	3270100	3428700	3131500	3308400	4592400	5434100	4274900	3.14853e+06	3.14693e+06	3.28953e+06	4.76713e+06	0.00161678	0.00390196	1.51485	5	-0.000733325	-0.0250675	0.991726	0.063203	-0.823616	0.668068	0.598442	-11.4447	0.00122553	0.0639363	-0.787317	0.72991	0.599175	-11.3898	0.00177802	0.535239	-9.9382	0.00642022	99.2717
sp	Homo sapiens	O43861	ATP9B_HUMAN	ATP9B	Probable phospholipid-transporting ATPase IIB	endosome [GO:0005768]; integral component of membrane [GO:0016021]; perinuclear region of cytoplasm [GO:0048471]; plasma membrane [GO:0005886]; trans-Golgi network [GO:0005802]	TRUE	10	243.6	35900000	6172800	6294100	6285100	5367300	5347600	5199000	5197500	4656400	5768800	3341000	4683300	3758800	6.25067e+06	5.30463e+06	5.20757e+06	3927700	0.00300505	0.00628635	1.59143	2	-0.236757	-3.59852	0.188041	-0.263401	-4.30364	0.102913	-0.670325	-13.5771	0.000362588	-0.0266436	-0.344739	0.866655	-0.433568	-8.85563	0.00710186	-0.406925	-8.11792	0.0158524	119.336
sp	Homo sapiens	O43865	SAHH2_HUMAN	AHCYL1	S-adenosylhomocysteine hydrolase-like protein 1	apical plasma membrane [GO:0016324]; cytoplasm [GO:0005737]; cytosol [GO:0005829]; endoplasmic reticulum membrane [GO:0005789]; extracellular exosome [GO:0070062]; mitochondria-associated endoplasmic reticulum membrane [GO:0044233]	TRUE	8	221.35	85700000	2257700	6612700	2374400	2639100	2386400	2845500	2636800	2720400	3508700	3469900	3489600	3173700	3.74827e+06	2.62367e+06	2955300	3.37773e+06	0.754174	0.7662	1.42864		-0.514639	-1.90096	0.425083	-0.342919	-0.857283	0.656898	-0.150168	-0.0544988	0.972637	0.17172	-0.754506	0.740157	0.364471	-2.00189	0.340153	0.192751	-0.937694	0.650633	71.0809
sp	Homo sapiens	O43896	KIF1C_HUMAN	KIF1C	Kinesin-like protein KIF1C	axon [GO:0030424]; axon cytoplasm [GO:1904115]; dendrite [GO:0030425]; endoplasmic reticulum [GO:0005783]; Golgi apparatus [GO:0005794]; kinesin complex [GO:0005871]; microtubule [GO:0005874]; neuron projection [GO:0043005]	FALSE	9	168	18000000	2274200	2352100	2111100	1827800	1778500	2030500	2327600	2295800	2209400	2265200	2068400	2066300	2245800	1.87893e+06	2277600	2133300					-0.257316	-5.53938	0.0719578	0.0202849	-0.726191	0.701927	-0.0741426	-0.929617	0.603112	0.277601	-6.98009	0.0602531	0.183173	-3.81842	0.121103	-0.0944275	-1.9543	0.391064	106.574
sp	Homo sapiens	O43900	PRIC3_HUMAN	PRICKLE3	Prickle planar cell polarity protein 3	cytoplasm [GO:0005737]; plasma membrane [GO:0005886]	TRUE	2	98.93	6720000	366650	429240	339930	254540	276580	341730	217510	245830	218600	227230	303430	214250	378607	290950	227313	248303	0.00907419	0.0155061	1.66557	1	-0.379929	-5.41024	0.0768512	-0.736018	-12.6908	0.00113152	-0.608596	-10.3828	0.00226216	-0.356089	-5.96552	0.0878516	-0.228668	-3.52243	0.142784	0.127421	-1.43244	0.507662	128.068
sp	Homo sapiens	O43913	ORC5_HUMAN	ORC5	Origin recognition complex subunit 5	chromatin [GO:0000785]; cytosol [GO:0005829]; nuclear chromosome, telomeric region [GO:0000784]; nuclear origin of replication recognition complex [GO:0005664]; nucleoplasm [GO:0005654]; nucleus [GO:0005634]; origin recognition complex [GO:0000808]	FALSE	3	79.94	28200000	1079700	1008300	1020500	806720	824920	940680	914640	809060	924020	642270	719110	696400	1.03617e+06	857440	882573	685927					-0.273148	-6.9756	0.0341838	-0.231468	-5.95853	0.0417276	-0.59513	-15.3338	0.000134081	0.0416804	-0.485443	0.839279	-0.321981	-7.54993	0.0146137	-0.363662	-8.55886	0.0127367	124.745
sp	Homo sapiens	O43933	PEX1_HUMAN	PEX1	Peroxisome biogenesis factor 1	cytoplasm [GO:0005737]; cytosol [GO:0005829]; extracellular exosome [GO:0070062]; peroxisomal membrane [GO:0005778]; peroxisome [GO:0005777]	TRUE	14	158.89	176000000	5136600	5176900	5114000	4836000	4940800	5652200	6073600	5129800	5273600	3412300	3855600	3610300	5142500	5143000	5.49233e+06	3.62607e+06	0.00031372	0.00110346	1.51468	2	0.000140265	-0.496935	0.814705	0.0949493	-1.05208	0.594337	-0.504064	-13.1132	0.000471065	0.094809	-1.78888	0.48657	-0.504205	-12.1972	0.00118836	-0.599014	-14.7672	0.000792966	105.888
sp	Homo sapiens	O43934	MFS11_HUMAN	MFSD11	UNC93-like protein MFSD11	integral component of membrane [GO:0016021]	TRUE	2	67.01	10400000	284780	275060	271310	336630	374480	367750	377110	374750	460110	301190	378430	401350	277050	359620	403990	360323	0.0108896	0.0180818	1.45818		0.376327	-8.25269	0.0183089	0.544173	-11.3264	0.00225558	0.379146	-7.45589	0.0127564	0.167846	-1.9436	0.458448	0.00281882	-0.371877	0.825565	-0.165028	-2.5994	0.279828	81.3086
sp	Homo sapiens	O60218	AK1BA_HUMAN	AKR1B10	Aldo-keto reductase family 1 member B10	cytosol [GO:0005829]; extracellular region [GO:0005576]; lysosome [GO:0005764]; mitochondrion [GO:0005739]	TRUE	10	213.34	3520000000	43194000	50443000	53712000	38905000	48250000	58715000	90188000	79847000	68073000	105430000	107240000	102290000	4.91163e+07	4.86233e+07	7.93693e+07	1.04987e+08	0.000263811	0.000956582	2.15918	4	-0.0145541	-0.565752	0.79224	0.692379	-10.7456	0.00308909	1.09593	-17.4231	4.23758e-05	0.706933	-11.8192	0.0115787	1.11049	-18.2525	7.01271e-05	0.403553	-6.43533	0.0372318	61.2473
sp	Homo sapiens	O60231	DHX16_HUMAN	DHX16	Pre-mRNA-splicing factor ATP-dependent RNA helicase DHX16	nucleoplasm [GO:0005654]; nucleus [GO:0005634]; spliceosomal complex [GO:0005681]; U2-type precatalytic spliceosome [GO:0071005]	FALSE	4	100.09	3350000	455690	312640	400540	484080	521880	630460	573480	552820	551230	508950	729990	582120	389623	545473	559177	607020					0.485429	-7.44089	0.027382	0.521224	-8.02348	0.0134146	0.639664	-10.3009	0.00237494	0.0357955	-0.263813	0.892633	0.154235	-1.72832	0.394609	0.11844	-1.30375	0.543398	86.7447
sp	Homo sapiens	O60232	ZNRD2_HUMAN	ZNRD2	Protein ZNRD2	0	FALSE	1	34.65	0	11913	13200	5160.5	9373.9	11130	15055	7822.5	8376.9	6861.8	10878	11204	12606	10091.2	11853	7687.07	11562.7					0.232155	-1.92348	0.42079	-0.392588	-1.6279	0.442648	0.196381	-1.92348	0.344103	-0.624743	-4.39416	0.164169	-0.035774	0	1	0.588969	-4.39416	0.109889	115.677
sp	Homo sapiens	O60241	AGRB2_HUMAN	ADGRB2	Adhesion G protein-coupled receptor B2	centrosome [GO:0005813]; integral component of membrane [GO:0016021]; integral component of plasma membrane [GO:0005887]; plasma membrane [GO:0005886]	TRUE	1	52.89	0	65238	69630	75425	72296	71797	79961	64014	55849	62594	49426	48489	51287	70097.7	74684.7	60819	49734					0.0914457	-1.19189	0.594642	-0.204844	-4.43784	0.0958106	-0.495134	-13.2615	0.000432405	-0.29629	-6.58952	0.0682893	-0.58658	-15.0762	0.000285126	-0.29029	-7.61344	0.02035	102.2
sp	Homo sapiens	O60243	H6ST1_HUMAN	HS6ST1	Heparan-sulfate 6-O-sulfotransferase 1	Golgi membrane [GO:0000139]; integral component of plasma membrane [GO:0005887]; nuclear speck [GO:0016607]; nucleoplasm [GO:0005654]	TRUE	1	40.76	1970000	60994	62134	72676	71475	69329	71871	51347	55880	48460	48795	58308	49485	65268	70891.7	51895.7	52196					0.11924	-2.36478	0.338187	-0.330762	-7.5251	0.0176793	-0.322437	-7.5251	0.0122142	-0.450002	-11.1325	0.0152733	-0.441677	-11.1325	0.00202273	0.00832517	-2.16231e-14	1	101.55
sp	Homo sapiens	O60244	MED14_HUMAN	MED14	Mediator of RNA polymerase II transcription subunit 14	core mediator complex [GO:0070847]; mediator complex [GO:0016592]; membrane [GO:0016020]; nucleoplasm [GO:0005654]; nucleus [GO:0005634]	FALSE	1	47.43	2180000	49882	45149	44509	36578	41978	66332	73671	52462	48544	73452	80819	43954	46513.3	48296	58225.7	66075					0.0542594	-0.224098	0.913491	0.324011	-2.41697	0.29043	0.50646	-3.71244	0.120422	0.269752	-2.00838	0.444741	0.452201	-3.25129	0.167882	0.182449	-0.736969	0.718373	91.0629
sp	Homo sapiens	O60245	PCDH7_HUMAN	PCDH7	Protocadherin-7	integral component of plasma membrane [GO:0005887]; plasma membrane [GO:0005886]; platelet alpha granule membrane [GO:0031092]	TRUE	15	218.85	152000000	3745200	3332900	3521200	3848500	3865600	3941800	2965400	2466100	2875100	2850400	3321900	2831000	3533100	3885300	2.76887e+06	3001100	0.00173155	0.00409909	1.40321		0.137091	-3.07254	0.241967	-0.351639	-6.68235	0.0278216	-0.235443	-4.15311	0.092743	-0.48873	-11.1131	0.0153161	-0.372535	-8.65477	0.00793081	0.116196	-1.46403	0.499403	113.591
sp	Homo sapiens	O60256	KPRB_HUMAN	PRPSAP2	Phosphoribosyl pyrophosphate synthase-associated protein 2	cytoplasm [GO:0005737]; ribose phosphate diphosphokinase complex [GO:0002189]	FALSE	5	154.83	10700000	633220	723900	767210	679730	778690	861160	883950	862290	879980	1171100	1155100	1019000	708110	773193	875407	1.11507e+06					0.126856	-2.64324	0.296167	0.30598	-7.12322	0.0219222	0.655085	-16.3194	7.62735e-05	0.179124	-3.1794	0.268884	0.528229	-13.007	0.000785191	0.349105	-8.65778	0.012198	72.9563
sp	Homo sapiens	O60264	SMCA5_HUMAN	SMARCA5	SWI/SNF-related matrix-associated actin-dependent regulator of chromatin subfamily A member 5	chromatin silencing complex [GO:0005677]; condensed chromosome [GO:0000793]; fibrillar center [GO:0001650]; nucleoplasm [GO:0005654]; nucleus [GO:0005634]; NURF complex [GO:0016589]; RSF complex [GO:0031213]	FALSE	23	307	484000000	12215000	12152000	12427000	10760000	10741000	11474000	11949000	11685000	11559000	10751000	10349000	11719000	1.22647e+07	1.09917e+07	11731000	1.09397e+07					-0.158098	-2.53875	0.310132	-0.064182	-0.810522	0.672795	-0.164939	-3.58215	0.130261	0.0939158	-1.31149	0.597028	-0.00684138	-0.572559	0.754706	-0.100757	-2.20046	0.344084	106.386
sp	Homo sapiens	O60266	ADCY3_HUMAN	ADCY3	Adenylate cyclase type 3	cilium [GO:0005929]; cytoplasm [GO:0005737]; Golgi apparatus [GO:0005794]; integral component of membrane [GO:0016021]; integral component of plasma membrane [GO:0005887]; membrane [GO:0016020]; plasma membrane [GO:0005886]	TRUE	30	321.53	852000000	26553000	23658000	25763000	31372000	31297000	31313000	25819000	22832000	26511000	19121000	21755000	18209000	2.53247e+07	3.13273e+07	25054000	19695000	0.000244293	0.00091252	1.59062	2	0.306879	-6.43428	0.045581	-0.0155023	-0.397991	0.827776	-0.362714	-8.13492	0.00848298	-0.322381	-7.2866	0.0538251	-0.669593	-15.3713	0.000251707	-0.347212	-7.2866	0.0239886	104.745
sp	Homo sapiens	O60269	GRIN2_HUMAN	GPRIN2	G protein-regulated inducer of neurite outgrowth 2	0	FALSE	2	70.33	2730000	114760	132560	142300	109350	107590	135650	131110	107910	105060	98066	131070	90488	129873	117530	114693	106541					-0.144076	-1.97045	0.411615	-0.179324	-1.97045	0.369852	-0.285692	-3.5923	0.129474	-0.0352475	0	1	-0.141616	-0.997377	0.593465	-0.106368	-0.997377	0.632251	97.9519
sp	Homo sapiens	O60271	JIP4_HUMAN	SPAG9	C-Jun-amino-terminal kinase-interacting protein 4	acrosomal vesicle [GO:0001669]; centriolar satellite [GO:0034451]; cytoplasm [GO:0005737]; cytosol [GO:0005829]; extracellular exosome [GO:0070062]; lysosomal membrane [GO:0005765]; perinuclear region of cytoplasm [GO:0048471]	TRUE	17	219.3	79400000	2564200	3197300	2597000	2584300	2959500	3032500	3423000	2788800	3145900	3859300	4787300	4117400	2.78617e+06	2.85877e+06	3.11923e+06	4.25467e+06	0.00445994	0.00861096	1.52707	5	0.0371113	-0.319585	0.87896	0.16291	-2.38134	0.295619	0.610765	-12.5498	0.000648506	0.125799	-1.82266	0.479162	0.573653	-11.925	0.0013662	0.447855	-9.05076	0.0100336	78.7843
sp	Homo sapiens	O60279	SUSD5_HUMAN	SUSD5	Sushi domain-containing protein 5	integral component of membrane [GO:0016021]	TRUE	6	136.55	99200000	3799300	3857800	3350200	2894300	2653800	2993200	2582800	2473300	2320300	2334700	3124200	2158200	3669100	2847100	2458800	2.53903e+06	0.00865265	0.0148884	1.49223		-0.365933	-6.33196	0.0479709	-0.577472	-10.9372	0.00277847	-0.531147	-9.66033	0.00344073	-0.211539	-3.21674	0.264555	-0.165214	-2.06953	0.327974	0.0463249	-0.669357	0.74566	131.989
sp	Homo sapiens	O60287	NPA1P_HUMAN	URB1	Nucleolar pre-ribosomal-associated protein 1	fibrillar center [GO:0001650]; nucleolus [GO:0005730]	FALSE	15	216.69	72900000	4079100	3452800	3686500	4058600	4339200	4631200	5042700	3724100	4424500	2051600	2918500	2590500	3.73947e+06	4343000	4397100	2520200					0.215859	-2.31966	0.346204	0.23372	-2.85729	0.228051	-0.569294	-9.24847	0.00436887	0.0178604	-0.287032	0.884414	-0.785154	-12.6632	0.000940782	-0.803014	-13.2156	0.00147583	108.778
sp	Homo sapiens	O60291	MGRN1_HUMAN	MGRN1	E3 ubiquitin-protein ligase MGRN1	cytoplasm [GO:0005737]; cytosol [GO:0005829]; early endosome [GO:0005769]; extracellular exosome [GO:0070062]; intracellular membrane-bounded organelle [GO:0043231]; membrane [GO:0016020]; nucleus [GO:0005634]; plasma membrane [GO:0005886]	TRUE	15	198.43	390000000	4498200	3889200	4075200	5280400	5069900	5468400	4500500	4179000	4414200	3369400	3992700	3636300	4154200	5272900	4.36457e+06	3.66613e+06	0.000691977	0.00200404	1.43827		0.344026	-9.14938	0.0117989	0.0712677	-1.22861	0.543863	-0.180311	-4.7234	0.0658495	-0.272758	-6.93869	0.0609764	-0.524337	-14.8123	0.000327755	-0.251579	-6.93869	0.0286089	103.065
sp	Homo sapiens	O60292	SI1L3_HUMAN	SIPA1L3	Signal-induced proliferation-associated 1-like protein 3	apical part of cell [GO:0045177]; apical plasma membrane [GO:0016324]; extracellular space [GO:0005615]; Golgi apparatus [GO:0005794]; nucleoplasm [GO:0005654]; plasma membrane [GO:0005886]; stress fiber [GO:0001725]; tricellular tight junction [GO:0061689]	TRUE	20	207.56	82300000	4025500	5493300	3746600	3964800	4092400	3901200	4301000	4849700	4529800	4532600	4237200	4878200	4421800	3.98613e+06	4.56017e+06	4.54933e+06	0.473309	0.497867	1.14401		-0.149644	-1.06209	0.632663	0.0444528	-0.726992	0.701664	0.0410214	-0.726992	0.674776	0.194097	-2.11904	0.426249	0.190665	-2.11904	0.319352	-0.00343141	0	1	91.9199
sp	Homo sapiens	O60293	ZC3H1_HUMAN	ZFC3H1	Zinc finger C3H1 domain-containing protein	exosome (RNase complex) [GO:0000178]; extracellular space [GO:0005615]; nucleus [GO:0005634]	TRUE	11	188.02	17900000	1034900	1122300	1027300	974220	966120	1035400	997040	903340	972250	840180	963080	803020	1061500	991913	957543	868760	0.0234335	0.0344474	1.22186		-0.0978184	-1.82798	0.439844	-0.148695	-3.57874	0.152933	-0.289075	-7.60489	0.0116635	-0.0508763	-1.1074	0.645835	-0.191256	-4.5698	0.0784396	-0.14038	-2.68097	0.267702	106.699
sp	Homo sapiens	O60294	TYW4_HUMAN	LCMT2	tRNA wybutosine-synthesizing protein 4	cytoplasm [GO:0005737]	FALSE	1	34.23	0	11351	23534	17105	11425	13805	18791	21305	8016.9	22574	19498	19774	18408	17330	14673.7	17298.6	19226.7					-0.240042	-0.827856	0.702782	-0.00261359	-0.259456	0.88371	0.149837	-0.916251	0.607368	0.237429	-0.495618	0.836636	0.389879	-2.07127	0.327763	0.152451	-1.29714	0.544615	66.2552
sp	Homo sapiens	O60306	AQR_HUMAN	AQR	RNA helicase aquarius	catalytic step 2 spliceosome [GO:0071013]; membrane [GO:0016020]; nucleoplasm [GO:0005654]; nucleus [GO:0005634]; spliceosomal complex [GO:0005681]; U2-type catalytic step 2 spliceosome [GO:0071007]	FALSE	6	138.95	12000000	1337300	1369500	1344300	1284900	1766000	1444100	1634700	1066300	1170000	920920	1108300	1143100	1.35037e+06	1.49833e+06	1.29033e+06	1057440					0.150007	-1.34978	0.552186	-0.0656074	-1.23104	0.543299	-0.352775	-5.27722	0.0472819	-0.215615	-3.15445	0.271945	-0.502783	-7.67773	0.0136379	-0.287168	-3.15445	0.209462	102.939
sp	Homo sapiens	O60312	AT10A_HUMAN	ATP10A	Probable phospholipid-transporting ATPase VA	endoplasmic reticulum [GO:0005783]; endoplasmic reticulum membrane [GO:0005789]; integral component of membrane [GO:0016021]; plasma membrane [GO:0005886]	TRUE	1	35.58	1860000	105800	112540	109440	115170	108510	111280	106950	86611	105100	127470	148800	109010	109260	111653	99553.7	128427					0.031261	-0.418045	0.841695	-0.134219	-1.65056	0.437985	0.233179	-3.79987	0.114608	-0.16548	-2.35216	0.385308	0.201918	-2.98848	0.19426	0.367398	-6.56291	0.0346376	94.2762
sp	Homo sapiens	O60313	OPA1_HUMAN	OPA1	Dynamin-like 120 kDa protein mitochondrial	axon cytoplasm [GO:1904115]; cytoplasm [GO:0005737]; cytosol [GO:0005829]; dendrite [GO:0030425]; extrinsic component of mitochondrial inner membrane [GO:0031314]; integral component of membrane [GO:0016021]; membrane [GO:0016020]; mitochondrial crista [GO:0030061]; mitochondrial inner membrane [GO:0005743]; mitochondrial intermembrane space [GO:0005758]; mitochondrial membrane [GO:0031966]; mito…	FALSE	29	277.07	500000000	15220000	14563000	14250000	16362000	16228000	16291000	15259000	14372000	15228000	12573000	15508000	15996000	1.46777e+07	1.62937e+07	14953000	1.46923e+07					0.150689	-3.52231	0.195551	0.0268123	-0.499334	0.789256	0.00144089	-0.454197	0.786064	-0.123876	-2.59651	0.346792	-0.149248	-4.42674	0.0851811	-0.0253714	-1.07484	0.609185	100.434
sp	Homo sapiens	O60318	GANP_HUMAN	MCM3AP	Germinal-center associated nuclear protein	chromosome [GO:0005694]; cytoplasm [GO:0005737]; cytosol [GO:0005829]; nuclear membrane [GO:0031965]; nuclear pore nuclear basket [GO:0044615]; nucleoplasm [GO:0005654]; nucleus [GO:0005634]; transcription export complex 2 [GO:0070390]	FALSE	7	160.69	40400000	1713000	1982500	1462200	1606700	1538200	1435000	1564400	1738700	1689400	925640	972390	1061800	1.71923e+06	1.52663e+06	1.66417e+06	986610					-0.171412	-2.30782	0.347515	-0.0469654	-0.496938	0.789917	-0.801214	-17.887	3.26579e-05	0.124446	-1.5023	0.549908	-0.629802	-15.1216	0.000279702	-0.754248	-17.1357	0.000318048	116.202
sp	Homo sapiens	O60333	KIF1B_HUMAN	KIF1B	Kinesin-like protein KIF1B	axon [GO:0030424]; axon cytoplasm [GO:1904115]; cytoplasmic vesicle [GO:0031410]; cytoplasmic vesicle membrane [GO:0030659]; dendrite [GO:0030425]; kinesin complex [GO:0005871]; microtubule [GO:0005874]; microtubule associated complex [GO:0005875]; mitochondrion [GO:0005739]; neuron projection [GO:0043005]; synaptic vesicle [GO:0008021]	FALSE	3	136.2	7610000	763520	755430	777270	736730	778620	778500	853690	839090	901480	933260	996550	907810	765407	764617	864753	945873					-0.00148982	-0.415483	0.842389	0.176062	-5.34566	0.0581434	0.305421	-8.96129	0.00518921	0.177552	-4.47971	0.157386	0.30691	-8.08868	0.0108392	0.129358	-2.28914	0.326988	91.4217
sp	Homo sapiens	O60341	KDM1A_HUMAN	KDM1A	Lysine-specific histone demethylase 1A	DNA repair complex [GO:1990391]; nuclear chromatin [GO:0000790]; nuclear chromosome, telomeric region [GO:0000784]; nucleoplasm [GO:0005654]; nucleus [GO:0005634]; protein-containing complex [GO:0032991]; transcription regulator complex [GO:0005667]	FALSE	1	37.25	1620000	40565	79985	59315	32220	42255	44065	37461	47080	50523	68860	38783	44871	59955	39513.3	45021.3	50838					-0.601541	-4.46024	0.122907	-0.413271	-2.80894	0.234073	-0.237973	-1.38791	0.468029	0.188269	-0.9382	0.688968	0.363568	-2.24268	0.298023	0.175298	-0.9382	0.650633	83.0707
sp	Homo sapiens	O60343	TBCD4_HUMAN	TBC1D4	TBC1 domain family member 4	cytosol [GO:0005829]; vesicle [GO:0031982]	FALSE	9	136.11	29000000	2633400	2524100	2471500	2661100	2560100	2980200	3533800	3308000	3304200	3605600	4059200	3794300	2543000	2733800	3382000	3819700					0.104376	-2.18506	0.371155	0.411345	-13.1534	0.000877503	0.586928	-17.3511	4.38438e-05	0.306969	-9.94861	0.0211679	0.482552	-14.6401	0.000357416	0.175583	-3.73263	0.155295	84.414
sp	Homo sapiens	O60353	FZD6_HUMAN	FZD6	Frizzled-6	apical plasma membrane [GO:0016324]; apicolateral plasma membrane [GO:0016327]; cell surface [GO:0009986]; cytoplasmic vesicle membrane [GO:0030659]; endoplasmic reticulum membrane [GO:0005789]; integral component of membrane [GO:0016021]; integral component of plasma membrane [GO:0005887]; plasma membrane [GO:0005886]	TRUE	18	249.72	611000000	9591700	8073200	9203900	7917800	8561800	8052600	6801500	6298800	7158800	5481300	7080700	5688300	8.95627e+06	8177400	6.75303e+06	6.08343e+06	0.00287017	0.0060382	1.47224		-0.131255	-2.18312	0.371459	-0.407362	-7.42056	0.0186853	-0.558012	-11.2339	0.0013844	-0.276107	-3.96288	0.192791	-0.426756	-7.85499	0.0123466	-0.15065	-2.54438	0.287587	128.017
sp	Homo sapiens	O60427	FADS1_HUMAN	FADS1	Acyl-CoA (8-3)-desaturase	endoplasmic reticulum membrane [GO:0005789]; integral component of membrane [GO:0016021]; intracellular membrane-bounded organelle [GO:0043231]; membrane [GO:0016020]; mitochondrion [GO:0005739]	FALSE	8	223.86	165000000	6893800	6873900	6214200	4584800	4588000	4791800	3798700	3136200	3597800	2119100	2555800	2220600	6.66063e+06	4.65487e+06	3510900	2298500					-0.51692	-12.6984	0.0021202	-0.923818	-20.1862	2.24313e-05	-1.53497	-28.9141	1.78539e-07	-0.406899	-8.34111	0.0370624	-1.01805	-21.7812	1.63823e-05	-0.611148	-14.8954	0.000754123	161.024
sp	Homo sapiens	O60437	PEPL_HUMAN	PPL	Periplakin	cornified envelope [GO:0001533]; cytoplasm [GO:0005737]; cytoskeleton [GO:0005856]; cytosol [GO:0005829]; desmosome [GO:0030057]; extracellular exosome [GO:0070062]; membrane [GO:0016020]	TRUE	19	220.57	34900000	2260600	3236000	1962500	2228300	2371800	2489800	2290100	3056600	2611500	3436800	3045500	3366000	2.48637e+06	2363300	2.65273e+06	3.28277e+06	0.108957	0.132555	1.38906		-0.0732363	-0.327228	0.875885	0.0934406	-0.793313	0.678869	0.400873	-5.62466	0.0383016	0.166677	-1.25418	0.607345	0.474109	-6.336	0.0287684	0.307433	-4.10779	0.127406	83.8411
sp	Homo sapiens	O60443	GSDME_HUMAN	GSDME	Gasdermin-E	cytosol [GO:0005829]; membrane [GO:0016020]; plasma membrane [GO:0005886]	TRUE	10	213.96	125000000	2550500	2679600	3061700	3068600	2969700	3288700	3834600	3443100	3360400	4122100	3965400	3998400	2.76393e+06	3109000	3.54603e+06	4.02863e+06	0.00053826	0.00164879	1.45757		0.169728	-3.17023	0.230516	0.359483	-10.2948	0.00395393	0.543568	-14.8909	0.000171025	0.189755	-5.70253	0.0966478	0.37384	-10.8218	0.00238548	0.184084	-3.68133	0.159276	75.8648
sp	Homo sapiens	O60447	EVI5_HUMAN	EVI5	Ecotropic viral integration site 5 protein homolog	cytosol [GO:0005829]; microtubule organizing center [GO:0005815]; nucleus [GO:0005634]; spindle [GO:0005819]	FALSE	4	106.71	4130000	859570	1021300	894840	1028400	1038200	1160600	1174800	1095200	1180800	874200	1007900	899820	925237	1.07573e+06	1.15027e+06	927307					0.217426	-4.90834	0.0985322	0.314074	-8.9565	0.00795734	0.00322409	-0.286496	0.860557	0.0966479	-2.65826	0.335999	-0.214202	-5.53073	0.0455354	-0.31085	-9.57049	0.00766225	84.3017
sp	Homo sapiens	O60462	NRP2_HUMAN	NRP2	Neuropilin-2	axon [GO:0030424]; extracellular region [GO:0005576]; glutamatergic synapse [GO:0098978]; integral component of membrane [GO:0016021]; membrane [GO:0016020]; plasma membrane [GO:0005886]; semaphorin receptor complex [GO:0002116]	TRUE	40	355.88	11000000000	149600000	129620000	137310000	95675000	97563000	96375000	80882000	68762000	71706000	83416000	95710000	82771000	1.38843e+08	9.65377e+07	7.37833e+07	87299000	2.34575e-05	0.000172073	1.88177	1	-0.524294	-12.965	0.00182706	-0.912091	-20.3663	2.03594e-05	-0.669421	-15.9384	9.52475e-05	-0.387797	-8.32078	0.0373436	-0.145127	-2.26867	0.293802	0.24267	-4.73109	0.0921497	150.935
sp	Homo sapiens	O60476	MA1A2_HUMAN	MAN1A2	Mannosyl-oligosaccharide 1 2-alpha-mannosidase IB	endoplasmic reticulum [GO:0005783]; extracellular exosome [GO:0070062]; Golgi apparatus [GO:0005794]; Golgi membrane [GO:0000139]; integral component of membrane [GO:0016021]; membrane [GO:0016020]	TRUE	6	119.13	33600000	878360	895630	860210	1243800	1408900	1484000	1571700	1501600	1793100	1609500	2193600	1811600	878067	1378900	1.62213e+06	1.87157e+06	9.84392e-05	0.000485663	2.13146	4	0.651115	-11.8891	0.00317176	0.88549	-16.5943	0.000147283	1.09184	-19.5915	1.36872e-05	0.234375	-4.11478	0.181227	0.440729	-8.32877	0.00947394	0.206354	-2.81691	0.249713	61.0962
sp	Homo sapiens	O60486	PLXC1_HUMAN	PLXNC1	Plexin-C1	integral component of plasma membrane [GO:0005887]; membrane [GO:0016020]; plasma membrane [GO:0005886]; semaphorin receptor complex [GO:0002116]	TRUE	2	106.78	3060000	270400	266060	284520	265020	290810	286720	267920	275810	298780	242280	262420	263290	273660	280850	280837	255997	0.133173	0.158472	1.09708		0.0374152	-0.420969	0.840665	0.0373467	-1.09729	0.58159	-0.0962596	-1.43262	0.455838	-6.84935e-05	-0.552519	0.819241	-0.133675	-2.11325	0.320497	-0.133606	-3.08107	0.216797	99.1072
sp	Homo sapiens	O60488	ACSL4_HUMAN	ACSL4	Long-chain-fatty-acid--CoA ligase 4	cytoplasm [GO:0005737]; endoplasmic reticulum [GO:0005783]; endoplasmic reticulum membrane [GO:0005789]; extracellular exosome [GO:0070062]; integral component of membrane [GO:0016021]; lipid droplet [GO:0005811]; membrane [GO:0016020]; mitochondria-associated endoplasmic reticulum membrane [GO:0044233]; mitochondrial outer membrane [GO:0005741]; neuronal cell body [GO:0043025]; peroxisomal membr…	TRUE	11	269.59	33400000	4149200	3826300	3777300	2926700	3018300	3249500	3821500	3323400	3495100	4870100	4526300	4850800	3917600	3.06483e+06	3.54667e+06	4.74907e+06	7.13901e-05	0.000387348	1.54954	5	-0.354161	-9.53401	0.00976832	-0.143506	-2.46321	0.28298	0.277674	-7.10692	0.0156618	0.210655	-5.72168	0.0963541	0.631835	-16.9824	0.000121074	0.42118	-10.8527	0.0041035	108.631
sp	Homo sapiens	O60499	STX10_HUMAN	STX10	Syntaxin-10	cytosol [GO:0005829]; endomembrane system [GO:0012505]; integral component of membrane [GO:0016021]; integral component of synaptic vesicle membrane [GO:0030285]; perinuclear region of cytoplasm [GO:0048471]; SNARE complex [GO:0031201]; synaptic vesicle [GO:0008021]; trans-Golgi network [GO:0005802]; trans-Golgi network membrane [GO:0032588]; vesicle [GO:0031982]	FALSE	1	36.16	1670000	177650	257030	244790	239770	234210	199130	252250	271590	234270	389160	289610	267130	226490	224370	252703	315300					-0.0135676	-0.062163	0.977337	0.157997	-1.57792	0.453058	0.477278	-5.75995	0.0353631	0.171565	-1.4713	0.557773	0.490845	-5.61431	0.0433421	0.31928	-3.15261	0.209485	69.7444
sp	Homo sapiens	O60502	OGA_HUMAN	OGA	Protein O-GlcNAcase	cytosol [GO:0005829]; membrane [GO:0016020]; nucleus [GO:0005634]	FALSE	9	158.91	144000000	4552500	4389000	4342300	3731500	3979100	4362100	4703900	3963400	4777400	3548700	3960600	3699600	4.42793e+06	4.02423e+06	4.48157e+06	3736300					-0.13792	-2.71253	0.286619	0.0173697	-0.133283	0.93854	-0.245023	-5.20833	0.0492706	0.155289	-2.98056	0.292536	-0.107104	-1.53667	0.440083	-0.262393	-5.51196	0.0609616	109.238
sp	Homo sapiens	O60503	ADCY9_HUMAN	ADCY9	Adenylate cyclase type 9	axon [GO:0030424]; dendrite [GO:0030425]; integral component of membrane [GO:0016021]; integral component of plasma membrane [GO:0005887]; plasma membrane [GO:0005886]	TRUE	30	345.88	1270000000	33222000	28801000	33443000	33778000	33179000	34378000	30259000	25091000	30313000	21214000	25586000	21682000	31822000	3.37783e+07	2.85543e+07	2.28273e+07	0.00235909	0.00520869	1.47973		0.0860736	-0.972596	0.658143	-0.156315	-1.92058	0.379588	-0.479262	-10.6861	0.00188871	-0.242388	-3.49796	0.235052	-0.565336	-12.3739	0.00108541	-0.322947	-7.5982	0.0204265	113.597
sp	Homo sapiens	O60504	VINEX_HUMAN	SORBS3	Vinexin	cytoskeleton [GO:0005856]; cytosol [GO:0005829]; focal adhesion [GO:0005925]; nucleus [GO:0005634]	FALSE	1	51.33	0	300740	384700	312200	363340	330620	379970	470240	452310	466920	592740	497940	518380	332547	357977	463157	536353					0.106309	-1.1135	0.618287	0.477943	-9.61046	0.00559147	0.689627	-14.8217	0.000177705	0.371635	-7.58461	0.0484817	0.583318	-13.0903	0.000754095	0.211683	-4.27561	0.117172	71.1797
sp	Homo sapiens	O60506	HNRPQ_HUMAN	SYNCRIP	Heterogeneous nuclear ribonucleoprotein Q	catalytic step 2 spliceosome [GO:0071013]; CRD-mediated mRNA stability complex [GO:0070937]; endoplasmic reticulum [GO:0005783]; GAIT complex [GO:0097452]; histone pre-mRNA 3'end processing complex [GO:0071204]; membrane [GO:0016020]; nucleoplasm [GO:0005654]; nucleus [GO:0005634]; ribonucleoprotein complex [GO:1990904]	FALSE	13	245.13	197000000	4199500	4458200	4728900	4524500	4579500	4720600	5218800	5074200	4909700	7582200	7232100	7222800	4462200	4608200	5.06757e+06	7345700					0.0464482	-0.625532	0.770225	0.183538	-4.23511	0.106568	0.719145	-20.5294	8.17922e-06	0.13709	-3.06013	0.282708	0.672697	-19.7166	3.75203e-05	0.535607	-16.53	0.000398949	78.1896
sp	Homo sapiens	O60507	TPST1_HUMAN	TPST1	Protein-tyrosine sulfotransferase 1	Golgi apparatus [GO:0005794]; Golgi membrane [GO:0000139]; integral component of Golgi membrane [GO:0030173]; membrane [GO:0016020]	FALSE	1	36.48	2080000	194280	220610	209580	172390	191100	174490	178480	149580	165290	143100	187640	144830	208157	179327	164450	158523					-0.21508	-4.61289	0.113834	-0.340021	-7.89214	0.0143953	-0.392975	-9.51267	0.00375448	-0.124941	-2.01839	0.442588	-0.177895	-3.43459	0.150325	-0.0529538	-0.851207	0.679087	109.383
sp	Homo sapiens	O60512	B4GT3_HUMAN	B4GALT3	Beta-1 4-galactosyltransferase 3	cytosol [GO:0005829]; extracellular exosome [GO:0070062]; Golgi apparatus [GO:0005794]; Golgi cisterna membrane [GO:0032580]; Golgi membrane [GO:0000139]; integral component of membrane [GO:0016021]	TRUE	1	40.64	0	73609	81054	93785	104700	79823	105740	113280	93673	113320	96899	126500	99311	82816	96754.3	106758	107570					0.224417	-3.08429	0.240769	0.366358	-5.59278	0.0510025	0.377294	-5.59278	0.0389852	0.141941	-1.51089	0.548098	0.152878	-1.51089	0.446772	0.0109361	-2.88308e-14	1	74.7493
sp	Homo sapiens	O60513	B4GT4_HUMAN	B4GALT4	Beta-1 4-galactosyltransferase 4	Golgi apparatus [GO:0005794]; Golgi cisterna membrane [GO:0032580]; Golgi membrane [GO:0000139]; integral component of membrane [GO:0016021]	FALSE	5	119.65	112000000	1898600	1800500	2016900	4679100	4511400	5036000	5051300	4749300	5111900	3547000	4360100	3709000	1.90533e+06	4.74217e+06	4.97083e+06	3.87203e+06					1.3155	-27.1191	1.46623e-06	1.38344	-27.9389	5.19179e-07	1.02305	-22.9224	2.48981e-06	0.0679414	-0.987575	0.675523	-0.292455	-6.7982	0.022168	-0.360396	-8.65532	0.012198	49.0266
sp	Homo sapiens	O60518	RNBP6_HUMAN	RANBP6	Ran-binding protein 6	cytoplasm [GO:0005737]; nucleus [GO:0005634]	FALSE	5	155.32	20600000	1537500	1219800	1600100	1805800	1791400	1936200	2007400	1668400	1926200	1119900	1229600	1177400	1.45247e+06	1.84447e+06	1.86733e+06	1.17563e+06					0.344699	-7.48537	0.0268236	0.362474	-7.48537	0.0180175	-0.305067	-6.11099	0.0286904	0.0177758	0	1	-0.649766	-14.5832	0.000368439	-0.667541	-14.5832	0.000873655	97.0047
sp	Homo sapiens	O60524	NEMF_HUMAN	NEMF	Nuclear export mediator factor NEMF	nucleus [GO:0005634]; RQC complex [GO:1990112]	FALSE	12	167.27	75000000	6302700	6394400	6543600	6028900	5946900	7375000	8668900	7951100	8486300	8292200	7865500	7586900	6.41357e+06	6.45027e+06	8.36877e+06	7.91487e+06					0.00823192	-0.0352877	0.988093	0.383888	-9.30519	0.0065307	0.303438	-8.32298	0.00757008	0.375656	-9.38665	0.0265352	0.295206	-8.4059	0.00909448	-0.08045	-0.477092	0.819476	86.494
sp	Homo sapiens	O60547	GMDS_HUMAN	GMDS	GDP-mannose 4 6 dehydratase	cytoplasm [GO:0005737]; cytosol [GO:0005829]; extracellular exosome [GO:0070062]	TRUE	5	119.77	65100000	1793900	1808600	1870600	1731200	1666800	1909500	2156200	2199300	2222300	2563800	2576700	2436300	1.82437e+06	1.76917e+06	2192600	2525600	1.50739e-05	0.000135998	1.42756		-0.0443258	-0.465521	0.824216	0.265247	-7.61936	0.016714	0.46923	-13.9367	0.000296219	0.309573	-8.59091	0.033866	0.513556	-14.7482	0.000339135	0.203984	-5.20476	0.0722617	86.331
sp	Homo sapiens	O60563	CCNT1_HUMAN	CCNT1	Cyclin-T1	cyclin/CDK positive transcription elongation factor complex [GO:0008024]; nucleoplasm [GO:0005654]; nucleus [GO:0005634]	FALSE	9	138.02	35800000	3931500	3959000	4055300	3553800	3865400	3924300	4064400	4372200	4190300	4083900	3524900	3623900	3.98193e+06	3.78117e+06	4.20897e+06	3.74423e+06					-0.0746376	-1.226	0.585212	0.079997	-1.71805	0.422681	-0.0887987	-1.98288	0.331794	0.154635	-3.60842	0.224296	-0.0141611	-0.491248	0.786605	-0.168796	-4.5836	0.0995232	100.062
sp	Homo sapiens	O60566	BUB1B_HUMAN	BUB1B	Mitotic checkpoint serine/threonine-protein kinase BUB1 beta	anaphase-promoting complex [GO:0005680]; condensed chromosome kinetochore [GO:0000777]; condensed chromosome outer kinetochore [GO:0000940]; condensed nuclear chromosome kinetochore [GO:0000778]; cytoplasm [GO:0005737]; cytosol [GO:0005829]; kinetochore [GO:0000776]; microtubule organizing center [GO:0005815]; perinuclear region of cytoplasm [GO:0048471]; spindle [GO:0005819]	FALSE	2	92.2	14400000	648890	893590	720300	515850	564860	545330	580450	800580	592380	1034800	591340	921760	754260	542013	657803	849300					-0.476734	-4.87086	0.10043	-0.197406	-1.90718	0.381932	0.171212	-1.09548	0.550888	0.279328	-2.02113	0.442268	0.647946	-6.89154	0.0211122	0.368618	-3.65684	0.161283	92.5869
sp	Homo sapiens	O60568	PLOD3_HUMAN	PLOD3	Multifunctional procollagen lysine hydroxylase and glycosyltransferase LH3	collagen-containing extracellular matrix [GO:0062023]; endoplasmic reticulum [GO:0005783]; endoplasmic reticulum lumen [GO:0005788]; endoplasmic reticulum membrane [GO:0005789]; extracellular exosome [GO:0070062]; extracellular space [GO:0005615]; Golgi apparatus [GO:0005794]; rough endoplasmic reticulum [GO:0005791]; trans-Golgi network [GO:0005802]	TRUE	4	78.64	57900000	995830	1115200	1390100	1574400	1663500	1674400	1390400	1692400	1613300	2124500	2217100	2323100	1.16704e+06	1.63743e+06	1.56537e+06	2.22157e+06	0.00043323	0.0013998	1.90359	4	0.488578	-10.5065	0.00615481	0.423642	-8.3091	0.0114606	0.928719	-17.9853	3.12389e-05	-0.0649355	-1.25471	0.607345	0.440141	-7.47355	0.0152869	0.505077	-9.70481	0.00719236	60.432
sp	Homo sapiens	O60573	IF4E2_HUMAN	EIF4E2	Eukaryotic translation initiation factor 4E type 2	cytoplasm [GO:0005737]; cytosol [GO:0005829]; eukaryotic translation initiation factor 4F complex [GO:0016281]; mRNA cap binding complex [GO:0005845]; P-body [GO:0000932]	FALSE	2	74.92	724000	490740	623220	532640	557330	641290	609200	824400	997990	729780	1247500	990280	1206000	548867	602607	850723	1.14793e+06					0.134761	-1.8311	0.439213	0.632234	-11.4927	0.00207754	1.0645	-18.5521	2.30098e-05	0.497473	-8.57445	0.033866	0.929742	-16.3325	0.000162212	0.432269	-7.22506	0.0247879	62.3138
sp	Homo sapiens	O60602	TLR5_HUMAN	TLR5	Toll-like receptor 5	integral component of plasma membrane [GO:0005887]; plasma membrane [GO:0005886]	TRUE	3	77.77	7100000	925010	822750	803340	1075700	1101000	1235300	966650	847780	1065500	703670	947060	712180	850367	1.13733e+06	959977	787637	0.0188448	0.0285876	1.44398		0.419498	-6.83905	0.036629	0.174914	-2.35402	0.299973	-0.110555	-1.32075	0.485997	-0.244584	-3.23288	0.262924	-0.530053	-9.18252	0.00590421	-0.285469	-4.49862	0.103678	99.0557
sp	Homo sapiens	O60610	DIAP1_HUMAN	DIAPH1	Protein diaphanous homolog 1	cytoplasm [GO:0005737]; cytosol [GO:0005829]; ficolin-1-rich granule membrane [GO:0101003]; microtubule organizing center [GO:0005815]; mitotic spindle [GO:0072686]; nucleus [GO:0005634]; plasma membrane [GO:0005886]; ruffle membrane [GO:0032587]; secretory granule membrane [GO:0030667]	TRUE	34	308.77	477000000	11715000	13312000	12774000	11724000	13943000	12163000	13202000	11866000	12709000	9110500	9963300	9468800	1.26003e+07	12610000	1.25923e+07	9514200	0.0017361	0.00410117	1.32539		0.00110638	-0.309014	0.882672	-0.000916264	-0.150639	0.930454	-0.405308	-11.2127	0.00140197	-0.00202264	-0.488185	0.838454	-0.406414	-10.5808	0.00272025	-0.404391	-11.5305	0.00300622	99.0345
sp	Homo sapiens	O60637	TSN3_HUMAN	TSPAN3	Tetraspanin-3	extracellular exosome [GO:0070062]; integral component of plasma membrane [GO:0005887]	TRUE	2	49.58	22700000	596050	502400	529090	690900	651200	735840	999320	807180	968490	1179400	1565300	1065200	542513	692647	924997	1.26997e+06	0.00022063	0.00085045	2.34089	4	0.352461	-5.09827	0.0901737	0.76979	-12.4094	0.00130722	1.22706	-19.2408	1.62736e-05	0.417329	-5.9639	0.0878753	0.874599	-14.2463	0.000427687	0.457271	-7.22516	0.0247879	69.5077
sp	Homo sapiens	O60645	EXOC3_HUMAN	EXOC3	Exocyst complex component 3	cytosol [GO:0005829]; exocyst [GO:0000145]; Golgi apparatus [GO:0005794]; growth cone [GO:0030426]; midbody [GO:0030496]; perinuclear region of cytoplasm [GO:0048471]; presynaptic membrane [GO:0042734]; secretory granule membrane [GO:0030667]	FALSE	21	275.23	241000000	7029800	6908300	6844500	7568800	7880200	9002700	9374400	8704800	9617100	6597300	8334500	7308900	6.92753e+06	8.15057e+06	9232100	7.41357e+06					0.234559	-6.03802	0.055671	0.414317	-11.7413	0.00181299	0.097826	-2.36145	0.266157	0.179758	-4.30451	0.170607	-0.136733	-2.5246	0.25424	-0.316491	-8.18823	0.0153407	88.6376
sp	Homo sapiens	O60658	PDE8A_HUMAN	PDE8A	High affinity cAMP-specific and IBMX-insensitive 3' 5'-cyclic phosphodiesterase 8A	cytosol [GO:0005829]; extracellular exosome [GO:0070062]	TRUE	7	121.02	22200000	5107900	4859400	5309000	5224400	5241500	5937500	6721900	5780800	6907000	6448100	8849500	6933600	5092100	5467800	6469900	7410400	0.0105272	0.0176358	1.45527		0.1027	-1.1617	0.603512	0.345483	-6.45881	0.0315564	0.541291	-10.1099	0.0026506	0.242783	-4.35527	0.166459	0.438591	-8.03061	0.0112019	0.195808	-2.34745	0.317438	83.5983
sp	Homo sapiens	O60664	PLIN3_HUMAN	PLIN3	Perilipin-3	cytoplasm [GO:0005737]; cytosol [GO:0005829]; endosome [GO:0005768]; endosome membrane [GO:0010008]; Golgi apparatus [GO:0005794]; lipid droplet [GO:0005811]; membrane [GO:0016020]; transport vesicle [GO:0030133]	FALSE	9	166.4	122000000	3973900	3834400	3708200	3596600	3532500	3644100	4437000	4015100	3794000	4723900	6281600	4721300	3.83883e+06	3.59107e+06	4.08203e+06	5.24227e+06					-0.0962555	-0.717585	0.738071	0.08862	-1.60367	0.448071	0.449523	-10.3009	0.00237494	0.184876	-2.75436	0.322127	0.545778	-11.6312	0.00157181	0.360903	-7.60731	0.0203859	94.8753
sp	Homo sapiens	O60669	MOT2_HUMAN	SLC16A7	Monocarboxylate transporter 2	integral component of membrane [GO:0016021]; integral component of plasma membrane [GO:0005887]; plasma membrane [GO:0005886]	TRUE	7	151.66	113000000	6596200	4218400	5684200	6473100	5923500	7020800	7778100	6553600	7573700	5117600	6910800	5881800	5499600	6.47247e+06	7301800	5.97007e+06	0.173815	0.201041	1.3277		0.234989	-2.50695	0.314807	0.408925	-5.67569	0.0485854	0.11842	-1.21222	0.517474	0.173937	-2.08231	0.432478	-0.116569	-0.876041	0.633136	-0.290505	-3.54528	0.171048	104.519
sp	Homo sapiens	O60671	RAD1_HUMAN	RAD1	Cell cycle checkpoint protein RAD1	checkpoint clamp complex [GO:0030896]; chromosome [GO:0005694]; intracellular membrane-bounded organelle [GO:0043231]; nucleoplasm [GO:0005654]; nucleus [GO:0005634]	FALSE	1	29.94	3780000	257170	351580	263190	245540	238080	256210	249320	246580	274520	367530	285430	294790	290647	246610	256807	315917					-0.237035	-2.86356	0.266002	-0.178584	-2.27691	0.312999	0.120278	-1.49078	0.440785	0.0584514	-0.316369	0.873825	0.357313	-5.31767	0.0513819	0.298861	-4.63986	0.0965798	92.6755
sp	Homo sapiens	O60674	JAK2_HUMAN	JAK2	Tyrosine-protein kinase JAK2	caveola [GO:0005901]; cytoplasm [GO:0005737]; cytoskeleton [GO:0005856]; cytosol [GO:0005829]; endosome lumen [GO:0031904]; euchromatin [GO:0000791]; focal adhesion [GO:0005925]; glutamatergic synapse [GO:0098978]; membrane raft [GO:0045121]; nucleolus [GO:0005730]; nucleoplasm [GO:0005654]; nucleus [GO:0005634]; plasma membrane [GO:0005886]; postsynapse [GO:0098794]	TRUE	3	79.36	3910000	482690	441460	478020	430860	447350	460570	501270	445410	465060	517470	578900	490640	467390	446260	470580	529003	0.0434273	0.0587996	1.18542		-0.0667424	-1.60911	0.489486	0.00981314	-0.256533	0.884991	0.17865	-3.40662	0.143518	0.0765555	-1.2046	0.620453	0.245392	-6.08194	0.0333883	0.168837	-3.9359	0.139359	100.916
sp	Homo sapiens	O60678	ANM3_HUMAN	PRMT3	Protein arginine N-methyltransferase 3	cytoplasm [GO:0005737]; cytosol [GO:0005829]	FALSE	11	191.3	202000000	9054100	11489000	9843800	9836900	10038000	10484000	12732000	12764000	13591000	12099000	12226000	11114000	1.0129e+07	1.01196e+07	13029000	11813000					-0.00132998	-0.196565	0.925398	0.363239	-9.38272	0.00627299	0.221888	-4.62456	0.0698192	0.364569	-8.94974	0.0300775	0.223218	-4.19686	0.097494	-0.141351	-3.30145	0.193446	80.3192
sp	Homo sapiens	O60684	IMA7_HUMAN	KPNA6	Importin subunit alpha-7	cytoplasm [GO:0005737]; host cell [GO:0043657]; membrane [GO:0016020]; nucleoplasm [GO:0005654]; nucleus [GO:0005634]	FALSE	11	232.3	387000000	4866900	5486600	5441800	4656000	4817300	5071400	6112600	6843700	6086900	7341000	6475600	6645700	5265100	4.84823e+06	6.34773e+06	6.82077e+06					-0.119002	-1.65852	0.476892	0.269781	-5.42013	0.0559612	0.373473	-9.33232	0.00416709	0.388782	-8.24471	0.0382439	0.492475	-11.9904	0.00132543	0.103692	-2.54389	0.287608	83.6171
sp	Homo sapiens	O60701	UGDH_HUMAN	UGDH	UDP-glucose 6-dehydrogenase	cytosol [GO:0005829]; extracellular exosome [GO:0070062]; nucleoplasm [GO:0005654]; nucleus [GO:0005634]	TRUE	17	249.12	1620000000	24180000	20253000	22582000	19749000	18315000	19389000	23506000	28108000	22507000	44418000	36531000	42877000	2.23383e+07	19151000	24707000	4.12753e+07	4.19577e-05	0.000263227	2.15526	5	-0.222102	-4.05164	0.15092	0.145398	-2.24305	0.319149	0.885758	-19.0451	1.79772e-05	0.3675	-7.58771	0.0484817	1.10786	-22.5192	1.26985e-05	0.74036	-16.4873	0.000403426	89.9958
sp	Homo sapiens	O60716	CTND1_HUMAN	CTNND1	Catenin delta-1	adherens junction [GO:0005912]; catenin complex [GO:0016342]; cell-cell junction [GO:0005911]; cytoplasm [GO:0005737]; cytosol [GO:0005829]; dendritic spine [GO:0043197]; extracellular exosome [GO:0070062]; glutamatergic synapse [GO:0098978]; growth cone [GO:0030426]; hippocampal mossy fiber to CA3 synapse [GO:0098686]; lamellipodium [GO:0030027]; midbody [GO:0030496]; nucleus [GO:0005634]; plasm…	TRUE	33	316.44	1300000000	17190000	18093000	18063000	19017000	19957000	19042000	23113000	26137000	22417000	26759000	24138000	27385000	17782000	1.93387e+07	23889000	26094000	0.000107313	0.000510315	1.46744		0.121071	-3.6084	0.18709	0.425929	-11.7342	0.00181668	0.553301	-15.3055	0.000136145	0.304858	-6.7685	0.0641359	0.43223	-10.855	0.00234227	0.127372	-2.75358	0.257945	78.9404
sp	Homo sapiens	O60749	SNX2_HUMAN	SNX2	Sorting nexin-2	cytoplasm [GO:0005737]; cytosol [GO:0005829]; early endosome membrane [GO:0031901]; endosome [GO:0005768]; endosome membrane [GO:0010008]; lamellipodium [GO:0030027]; lysosome [GO:0005764]; membrane [GO:0016020]; protein-containing complex [GO:0032991]; retromer, tubulation complex [GO:0030905]; retromer complex [GO:0030904]	FALSE	12	188.09	53000000	4607300	5006900	4588300	5975000	6200400	6439300	8095800	7233900	8009900	7119000	7746000	7165800	4.73417e+06	6204900	7.77987e+06	7343600					0.390297	-12.492	0.00232675	0.716635	-20.3116	2.10565e-05	0.633377	-19.5666	1.38552e-05	0.326337	-8.76526	0.0320354	0.24308	-7.62325	0.0140238	-0.083258	-0.560123	0.79071	70.7115
sp	Homo sapiens	O60762	DPM1_HUMAN	DPM1	Dolichol-phosphate mannosyltransferase subunit 1	dolichol-phosphate-mannose synthase complex [GO:0033185]; endoplasmic reticulum [GO:0005783]; endoplasmic reticulum membrane [GO:0005789]; membrane [GO:0016020]; nucleus [GO:0005634]	FALSE	8	192	489000000	6615400	6584700	6919100	6721600	7041400	7417900	7962700	8837100	8068700	6780100	6537600	7282100	6706400	7060300	8289500	6866600					0.074191	-0.817875	0.705739	0.305747	-7.47267	0.0181375	0.0340574	-0.23576	0.884985	0.231556	-5.8775	0.0907388	-0.0401336	-0.513433	0.777827	-0.271689	-6.94587	0.028498	91.4905
sp	Homo sapiens	O60763	USO1_HUMAN	USO1	General vesicular transport factor p115	cytosol [GO:0005829]; endoplasmic reticulum [GO:0005783]; ER to Golgi transport vesicle membrane [GO:0012507]; fibrillar center [GO:0001650]; Golgi apparatus [GO:0005794]; Golgi membrane [GO:0000139]; Golgi stack [GO:0005795]; membrane [GO:0016020]; perinuclear region of cytoplasm [GO:0048471]; transport vesicle [GO:0030133]	FALSE	27	308.7	554000000	18221000	18437000	17523000	17013000	18024000	20111000	22501000	20002000	21847000	17951000	20626000	20120000	1.80603e+07	1.83827e+07	21450000	1.95657e+07					0.0255215	-0.28321	0.890206	0.248153	-5.86556	0.0440411	0.1155	-2.22543	0.288837	0.222632	-5.24586	0.116376	0.0899782	-1.73416	0.393399	-0.132653	-2.5183	0.291385	94.0941
sp	Homo sapiens	O60779	S19A2_HUMAN	SLC19A2	Thiamine transporter 1	integral component of membrane [GO:0016021]; plasma membrane [GO:0005886]	TRUE	4	123.01	76000000	1661500	1422300	1538800	1780200	1609400	1597300	1595600	1340300	1409400	1457100	1572100	1419000	1.54087e+06	1662300	1.44843e+06	1.48273e+06	0.172441	0.199555	1.14765		0.109439	-1.31232	0.563291	-0.0892487	-1.84037	0.396052	-0.0554829	-1.18578	0.5243	-0.198687	-3.87488	0.199478	-0.164922	-3.04714	0.188103	0.0337659	-0.425297	0.8297	108.341
sp	Homo sapiens	O60783	RT14_HUMAN	MRPS14	28S ribosomal protein S14 mitochondrial	mitochondrial inner membrane [GO:0005743]; mitochondrial ribosome [GO:0005761]; mitochondrial small ribosomal subunit [GO:0005763]; small ribosomal subunit [GO:0015935]	FALSE	1	80.09	27600000	4442400	5532500	4732200	3660300	3846500	4695500	4487600	4532600	4723500	2992600	2919700	3358800	4.90237e+06	4.06743e+06	4.58123e+06	3.09037e+06					-0.26936	-4.71451	0.108399	-0.0977423	-1.31795	0.52073	-0.6657	-13.7125	0.000336369	0.171617	-2.5439	0.354879	-0.396341	-7.85363	0.012348	-0.567958	-11.6326	0.00290149	106.779
sp	Homo sapiens	O60784	TOM1_HUMAN	TOM1	Target of Myb protein 1	azurophil granule membrane [GO:0035577]; cytoplasm [GO:0005737]; cytosol [GO:0005829]; early endosome [GO:0005769]; endosome [GO:0005768]; extracellular exosome [GO:0070062]; membrane [GO:0016020]; plasma membrane [GO:0005886]; specific granule membrane [GO:0035579]	TRUE	9	191.31	35200000	1420600	1285300	1235000	1240900	1299100	1323100	1220500	1142800	1244000	1495400	1619300	1519100	1.31363e+06	1287700	1.20243e+06	1544600	0.0017241	0.0040858	1.28456		-0.0287661	-0.510025	0.811444	-0.127606	-2.99764	0.210988	0.233671	-6.40707	0.0240016	-0.0988396	-2.0999	0.429751	0.262437	-7.4697	0.0153142	0.361276	-10.778	0.00424122	106.246
sp	Homo sapiens	O60826	CCD22_HUMAN	CCDC22	Coiled-coil domain-containing protein 22	cytosol [GO:0005829]; endosome [GO:0005768]; nucleoplasm [GO:0005654]	FALSE	20	223.31	97500000	4620200	5067700	4643200	5087600	5185700	5993400	7054400	6781700	7013000	6252100	6593900	6260200	4.77703e+06	5.42223e+06	6949700	6.36873e+06					0.182772	-4.98601	0.0951377	0.540836	-15.6409	0.000239037	0.414892	-13.0362	0.000490243	0.358064	-9.89227	0.0215452	0.232119	-6.79029	0.0222726	-0.125944	-1.89876	0.403739	78.5825
sp	Homo sapiens	O60828	PQBP1_HUMAN	PQBP1	Polyglutamine-binding protein 1	cytoplasm [GO:0005737]; cytoplasmic stress granule [GO:0010494]; cytosol [GO:0005829]; neuronal ribonucleoprotein granule [GO:0071598]; nuclear body [GO:0016604]; nuclear speck [GO:0016607]; nucleoplasm [GO:0005654]; nucleus [GO:0005634]	FALSE	2	71.01	1790000	373120	617670	315660	355110	374910	379530	303670	280580	359390	311170	409610	389150	435483	369850	314547	369977					-0.235677	-1.66243	0.476498	-0.469343	-3.95763	0.12438	-0.235183	-1.66243	0.399447	-0.233666	-1.5423	0.541705	0.000494011	-2.01816e-14	1	0.23416	-1.5423	0.478913	100.176
sp	Homo sapiens	O60830	TI17B_HUMAN	TIMM17B	Mitochondrial import inner membrane translocase subunit Tim17-B	integral component of mitochondrial inner membrane [GO:0031305]; mitochondrial inner membrane [GO:0005743]; TIM23 mitochondrial import inner membrane translocase complex [GO:0005744]	FALSE	4	162.08	209000000	5919200	5738700	5745000	4759000	4822200	5106200	3641800	3420300	3390600	2555200	2737700	2985300	5.80097e+06	4895800	3.48423e+06	2759400					-0.244749	-7.12215	0.0318305	-0.735452	-21.174	1.32201e-05	-1.07194	-27.2059	3.77341e-07	-0.490703	-15.0658	0.00354634	-0.82719	-22.8498	1.17812e-05	-0.336487	-9.9469	0.00640677	139.765
sp	Homo sapiens	O60831	PRAF2_HUMAN	PRAF2	PRA1 family protein 2	endosome membrane [GO:0010008]; integral component of membrane [GO:0016021]; membrane [GO:0016020]	FALSE	3	90.04	102000000	1047800	3801700	1122400	1049600	1100200	1181200	1149200	1071700	1204400	865250	898960	822060	1.99063e+06	1.11033e+06	1.14177e+06	862090					-0.842235	-2.80172	0.274422	-0.80196	-2.80172	0.235008	-1.20732	-5.70865	0.0364687	0.040275	0	1	-0.365082	-1.83825	0.371413	-0.405357	-1.83825	0.414993	82.1027
sp	Homo sapiens	O60832	DKC1_HUMAN	DKC1	H/ACA ribonucleoprotein complex subunit DKC1	box H/ACA scaRNP complex [GO:0072589]; box H/ACA snoRNP complex [GO:0031429]; box H/ACA telomerase RNP complex [GO:0090661]; cytoplasm [GO:0005737]; fibrillar center [GO:0001650]; nucleolus [GO:0005730]; nucleoplasm [GO:0005654]; nucleus [GO:0005634]; telomerase holoenzyme complex [GO:0005697]	FALSE	16	226.5	171000000	6688800	5823900	7160700	13749000	14685000	13952000	7058800	8124000	8402700	8958700	9175100	9029400	6557800	1.41287e+07	7.86183e+06	9054400					1.10734	-23.8031	8.11241e-06	0.261654	-6.27069	0.0349233	0.465407	-10.9302	0.00164388	-0.845688	-19.0918	0.000965388	-0.641934	-15.6269	0.000225064	0.203753	-3.26529	0.197241	71.1523
sp	Homo sapiens	O60841	IF2P_HUMAN	EIF5B	Eukaryotic translation initiation factor 5B	cytoplasm [GO:0005737]; cytosol [GO:0005829]	FALSE	14	185.71	48900000	3674800	4103900	4069200	4147700	4193900	4898800	6192900	5604800	5339900	6103400	6390700	6262700	3949300	4.41347e+06	5.71253e+06	6.25227e+06					0.160315	-2.55195	0.308467	0.532534	-12.1966	0.00144946	0.662782	-15.2965	0.000136883	0.372218	-8.46198	0.0352934	0.502467	-11.9375	0.00135662	0.130249	-2.31138	0.323438	72.3117
sp	Homo sapiens	O60858	TRI13_HUMAN	TRIM13	E3 ubiquitin-protein ligase TRIM13	cytoplasm [GO:0005737]; endoplasmic reticulum membrane [GO:0005789]; endoplasmic reticulum quality control compartment [GO:0044322]; integral component of membrane [GO:0016021]; perinuclear endoplasmic reticulum [GO:0097038]	FALSE	1	63.13	599000	84988	88592	75091	75827	76424	90917	64094	78929	76952	82239	64212	69058	82890.3	81056	73325	71836.3					-0.0322849	-0.489319	0.816822	-0.176899	-2.64649	0.255693	-0.20649	-3.31678	0.151233	-0.144614	-1.81356	0.481591	-0.174205	-2.42247	0.26872	-0.0295915	-0.35046	0.849357	109.979
sp	Homo sapiens	O60869	EDF1_HUMAN	EDF1	Endothelial differentiation-related factor 1	cytoplasm [GO:0005737]; cytosol [GO:0005829]; intracellular [GO:0005622]; nucleolus [GO:0005730]; nucleoplasm [GO:0005654]; nucleus [GO:0005634]	FALSE	3	76.72	14100000	419980	422500	384080	475350	495510	436030	537860	466560	429370	565420	605910	580350	408853	468963	477930	583893					0.197892	-3.40821	0.206983	0.225216	-3.40821	0.16779	0.514121	-11.7988	0.000994848	0.0273242	0	1	0.31623	-7.05749	0.0192778	0.288906	-7.05749	0.0269673	86.6099
sp	Homo sapiens	O60879	DIAP2_HUMAN	DIAPH2	Protein diaphanous homolog 2	cytosol [GO:0005829]; early endosome [GO:0005769]; endoplasmic reticulum [GO:0005783]; intracellular membrane-bounded organelle [GO:0043231]; nucleolus [GO:0005730]	FALSE	3	97.47	4180000	241830	288490	259710	234780	260390	293640	365300	332140	295220	285000	351290	311410	263343	262937	330887	315900					-0.0022296	-0.12157	0.954775	0.329392	-5.48479	0.0539317	0.262523	-3.3664	0.146947	0.331622	-5.76399	0.0946223	0.264753	-3.62464	0.135023	-0.0668692	-1.21418	0.567492	82.4608
sp	Homo sapiens	O60884	DNJA2_HUMAN	DNAJA2	DnaJ homolog subfamily A member 2	cytosol [GO:0005829]; extracellular exosome [GO:0070062]; membrane [GO:0016020]	TRUE	8	197.54	326000000	11447000	10658000	11133000	11028000	11566000	13472000	15094000	14726000	13788000	18284000	16562000	15743000	1.10793e+07	12022000	14536000	16863000	0.000362956	0.00123195	1.52202	4	0.117806	-3.05002	0.244177	0.391759	-9.84337	0.0049758	0.60599	-15.9032	9.71494e-05	0.273953	-5.36704	0.110489	0.488184	-12.1159	0.00123787	0.214231	-5.36704	0.0661127	84.0142
sp	Homo sapiens	O60885	BRD4_HUMAN	BRD4	Bromodomain-containing protein 4	chromosome [GO:0005694]; condensed nuclear chromosome [GO:0000794]; nucleoplasm [GO:0005654]; nucleus [GO:0005634]	FALSE	19	203.19	146000000	3638600	4020900	4213600	6444100	6343400	6010600	6256700	5966700	6467100	6194000	7800300	6809600	3957700	6.26603e+06	6.23017e+06	6.93463e+06					0.66289	-16.4449	0.000308978	0.654609	-16.4449	0.000157911	0.809157	-19.8718	1.17046e-05	-0.00828169	-4.32463e-14	1	0.146267	-3.37613	0.155556	0.154549	-3.37613	0.186742	62.2288
sp	Homo sapiens	O60888	CUTA_HUMAN	CUTA	Protein CutA	extracellular exosome [GO:0070062]; membrane [GO:0016020]	TRUE	1	39.33	4400000	20505	40979	43456	33290	34914	27524	26229	90639	43323	95482	47955	69938	34980	31909.3	53397	71125					-0.132552	-0.220536	0.91474	0.610228	-2.18536	0.329451	1.02383	-5.24687	0.0481495	0.74278	-2.59702	0.346792	1.15638	-5.73752	0.0405052	0.413598	-2.04714	0.372055	42.8501
sp	Homo sapiens	O60890	OPHN1_HUMAN	OPHN1	Oligophrenin-1	actin cytoskeleton [GO:0015629]; cytoplasm [GO:0005737]; cytosol [GO:0005829]; dendritic spine [GO:0043197]; terminal bouton [GO:0043195]	FALSE	5	128.02	7560000	580480	678150	617250	640750	609610	659200	687310	685260	680000	549210	569990	539960	625293	636520	684190	553053					0.0256727	-0.699212	0.7429	0.129864	-4.17053	0.110103	-0.177115	-3.58446	0.130085	0.104191	-2.88781	0.305041	-0.202787	-4.91796	0.0644046	-0.306978	-9.22453	0.00916107	92.9119
sp	Homo sapiens	O60906	NSMA_HUMAN	SMPD2	Sphingomyelin phosphodiesterase 2	caveola [GO:0005901]; cell periphery [GO:0071944]; endoplasmic reticulum [GO:0005783]; integral component of plasma membrane [GO:0005887]; membrane [GO:0016020]; plasma membrane [GO:0005886]	TRUE	1	47.52	1390000	180240	158710	152000	182190	149280	182930	162120	133100	164780	177500	225760	192520	163650	171467	153333	198593					0.0673145	-0.77657	0.718983	-0.0939422	-1.46218	0.48297	0.279204	-4.05842	0.0981497	-0.161257	-2.67246	0.333482	0.211889	-2.67246	0.233794	0.373146	-6.58007	0.0343334	104.937
sp	Homo sapiens	O60934	NBN_HUMAN	NBN	Nibrin	cytosol [GO:0005829]; Mre11 complex [GO:0030870]; nuclear chromosome, telomeric region [GO:0000784]; nuclear inclusion body [GO:0042405]; nucleolus [GO:0005730]; nucleoplasm [GO:0005654]; nucleus [GO:0005634]; PML body [GO:0016605]; replication fork [GO:0005657]; site of double-strand break [GO:0035861]	FALSE	1	31.73	782000	126180	127970	143230	110020	114370	141550	96072	102470	109300	84319	107800	92172	132460	121980	102614	94763.7					-0.118912	-1.72024	0.463891	-0.368329	-6.89423	0.0248408	-0.483151	-9.2634	0.00433702	-0.249417	-4.02401	0.188253	-0.364239	-6.37186	0.0282773	-0.114822	-1.3403	0.532788	111.709
sp	Homo sapiens	O60941	DTNB_HUMAN	DTNB	Dystrobrevin beta	cytoplasm [GO:0005737]; plasma membrane [GO:0005886]; synapse [GO:0045202]	TRUE	2	49.04	5640000	434300	466460	340370	340120	365000	407020	453700	397040	478470	502410	536220	519080	413710	370713	443070	519237	0.0258664	0.0372624	1.40064		-0.158316	-2.07284	0.390788	0.0989148	-1.69289	0.428072	0.327772	-5.96021	0.0313988	0.257231	-4.66124	0.14733	0.486088	-9.30409	0.00553982	0.228858	-3.19421	0.205079	99.4544
sp	Homo sapiens	O60942	MCE1_HUMAN	RNGTT	mRNA-capping enzyme	nucleoplasm [GO:0005654]; nucleus [GO:0005634]	FALSE	2	64.21	573000	80406	84051	86082	66411	68863	62903	67320	112400	64083	58892	82722	45612	83513	66059	81267.7	62408.7					-0.338246	-2.99405	0.249942	-0.0393193	-0.52561	0.778842	-0.420254	-4.56311	0.0724864	0.298926	-2.07386	0.434027	-0.0820087	-0.87276	0.634118	-0.380935	-3.53065	0.172468	109.676
sp	Homo sapiens	O75027	ABCB7_HUMAN	ABCB7	ATP-binding cassette sub-family B member 7 mitochondrial	integral component of membrane [GO:0016021]; mitochondrial inner membrane [GO:0005743]	FALSE	6	115.79	31600000	2164600	1882200	2152800	2168700	2205700	2540800	2789500	2408500	2698300	2782400	3363800	2834100	2.06653e+06	2.30507e+06	2632100	2.99343e+06					0.157596	-3.06667	0.242568	0.349002	-7.83988	0.0148158	0.534589	-11.7512	0.00102033	0.191406	-3.39061	0.245538	0.376993	-7.38367	0.0160452	0.185587	-2.6666	0.269876	86.6088
sp	Homo sapiens	O75044	SRGP2_HUMAN	SRGAP2	SLIT-ROBO Rho GTPase-activating protein 2	cytoplasm [GO:0005737]; cytosol [GO:0005829]; dendritic spine head [GO:0044327]; lamellipodium [GO:0030027]; nucleoplasm [GO:0005654]; phagocytic vesicle [GO:0045335]; plasma membrane [GO:0005886]; postsynaptic density [GO:0014069]; postsynaptic membrane [GO:0045211]	TRUE	3	135.46	4720000	288310	400910	330930	300900	294280	285180	313150	272820	318350	251800	364120	261180	340050	293453	301440	292367	0.541253	0.56428	1.16309		-0.212616	-1.76588	0.45369	-0.173876	-0.954311	0.625015	-0.217968	-2.22305	0.289193	0.0387398	-0.56379	0.816155	-0.00535226	-0.261343	0.870845	-0.044092	-0.907052	0.660682	93.9648
sp	Homo sapiens	O75051	PLXA2_HUMAN	PLXNA2	Plexin-A2	integral component of plasma membrane [GO:0005887]; plasma membrane [GO:0005886]; semaphorin receptor complex [GO:0002116]	TRUE	36	322.91	1470000000	44837000	41270000	44109000	47351000	47733000	45464000	40715000	35182000	38782000	28993000	35049000	29594000	4.34053e+07	4.68493e+07	3.82263e+07	31212000	0.000427975	0.0013892	1.501	2	0.110156	-1.6613	0.476646	-0.183305	-3.19992	0.188387	-0.475772	-11.4133	0.00124925	-0.293462	-5.92449	0.0893908	-0.585928	-13.9122	0.000494542	-0.292466	-6.86528	0.0297281	112.308
sp	Homo sapiens	O75052	CAPON_HUMAN	NOS1AP	Carboxyl-terminal PDZ ligand of neuronal nitric oxide synthase protein	caveola [GO:0005901]; cytosol [GO:0005829]; mitochondrion [GO:0005739]; nucleus [GO:0005634]; perinuclear region of cytoplasm [GO:0048471]; sarcolemma [GO:0042383]; sarcoplasmic reticulum membrane [GO:0033017]; T-tubule [GO:0030315]; Z disc [GO:0030018]	FALSE	2	76.91	788000	100150	452650	87367	99053	96972	104340	91062	87535	175250	128950	120850	115610	213389	100122	117949	121803					-1.09173	-2.24545	0.360015	-0.855323	-1.65178	0.437711	-0.808932	-1.11638	0.544618	0.236409	-0.350272	0.865518	0.282799	-0.770873	0.671162	0.0463904	-0.350272	0.849357	72.4068
sp	Homo sapiens	O75054	IGSF3_HUMAN	IGSF3	Immunoglobulin superfamily member 3	cell surface [GO:0009986]; integral component of membrane [GO:0016021]	TRUE	45	372.6	8220000000	93631000	88031000	90725000	87135000	85911000	87977000	73589000	60923000	77336000	55347000	70564000	56693000	9.07957e+07	8.70077e+07	70616000	60868000	0.00223705	0.00498861	1.49168		-0.0614809	-0.352205	0.866584	-0.362628	-7.49463	0.0179403	-0.576939	-12.2651	0.000762678	-0.301147	-6.73192	0.0648152	-0.515459	-11.5752	0.00162274	-0.214311	-3.48141	0.176863	121.093
sp	Homo sapiens	O75056	SDC3_HUMAN	SDC3	Syndecan-3	cell surface [GO:0009986]; collagen-containing extracellular matrix [GO:0062023]; Golgi lumen [GO:0005796]; integral component of membrane [GO:0016021]; lysosomal lumen [GO:0043202]; membrane [GO:0016020]; microspike [GO:0044393]; plasma membrane [GO:0005886]	TRUE	2	77.06	10500000	728260	1057000	920590	270170	304740	305630	250160	165630	224490	208870	256670	202200	901950	293513	213427	222580	1.2658e-05	0.000120116	4.22604	1	-1.61962	-21.2779	2.49677e-05	-2.07931	-25.3633	1.6609e-06	-2.01872	-24.5567	1.19736e-06	-0.459686	-5.89191	0.0902107	-0.399102	-4.31564	0.0911407	0.0605835	-0.824238	0.686907	178.553
sp	Homo sapiens	O75063	XYLK_HUMAN	FAM20B	Glycosaminoglycan xylosylkinase	Golgi apparatus [GO:0005794]; Golgi membrane [GO:0000139]; integral component of membrane [GO:0016021]; nucleoplasm [GO:0005654]	FALSE	2	100.94	18400000	441780	329160	462820	935170	1026800	975960	970790	919960	1008000	1013400	1597100	1067400	411253	979310	966250	1.22597e+06					1.25174	-17.7545	0.000161098	1.23237	-17.3535	9.9191e-05	1.57582	-21.0602	6.3573e-06	-0.0193691	-0.249333	0.896961	0.324082	-3.47731	0.146616	0.343451	-3.99474	0.135334	49.3226
sp	Homo sapiens	O75064	DEN4B_HUMAN	DENND4B	DENN domain-containing protein 4B	cytoplasmic vesicle [GO:0031410]; cytosol [GO:0005829]; Golgi apparatus [GO:0005794]; nucleoplasm [GO:0005654]	FALSE	1	30.83	380000	57079	54958	62098	44933	51252	54639	57737	45209	44307	35344	54331	46558	58045	50274.7	49084.3	45411					-0.20734	-2.65037	0.295153	-0.241909	-3.20346	0.188027	-0.35413	-5.61135	0.0385892	-0.034569	-0.285495	0.884663	-0.14679	-1.8982	0.360664	-0.112221	-1.42858	0.508766	112.574
sp	Homo sapiens	O75071	EFC14_HUMAN	EFCAB14	EF-hand calcium-binding domain-containing protein 14	0	FALSE	4	80.95	4420000	666670	627230	641470	744230	711290	755610	924800	882420	1014600	880660	1160700	953610	645123	737043	940607	998323					0.192174	-3.306	0.217703	0.544017	-13.464	0.000749621	0.629932	-14.2142	0.00025308	0.351842	-9.03867	0.0297371	0.437758	-9.89862	0.00396082	0.0859156	-0.416993	0.831087	80.2952
sp	Homo sapiens	O75077	ADA23_HUMAN	ADAM23	Disintegrin and metalloproteinase domain-containing protein 23	extracellular region [GO:0005576]; integral component of plasma membrane [GO:0005887]; integral component of presynaptic membrane [GO:0099056]; plasma membrane [GO:0005886]	TRUE	1	43.39	0	15070	24461	21185	15169	20534	12621	8587.7	16230	18528	11539	12937	20134	20238.7	16108	14448.6	14870					-0.329337	-2.03213	0.398905	-0.486188	-3.34856	0.173504	-0.44471	-2.80085	0.205526	-0.156851	-0.783206	0.731419	-0.115373	-0.435264	0.803859	0.0414783	-0.278611	0.875516	91.799
sp	Homo sapiens	O75083	WDR1_HUMAN	WDR1	WD repeat-containing protein 1	actin filament [GO:0005884]; cell-cell junction [GO:0005911]; cell junction [GO:0030054]; cell projection [GO:0042995]; cortical actin cytoskeleton [GO:0030864]; cytosol [GO:0005829]; extracellular exosome [GO:0070062]; extracellular region [GO:0005576]; plasma membrane [GO:0005886]; podosome [GO:0002102]	TRUE	19	207.97	527000000	9820400	9448300	8315200	8673800	9173300	12484000	14985000	11448000	12115000	12790000	11800000	11851000	9.19463e+06	1.01104e+07	1.28493e+07	12147000	0.0429838	0.0582345	1.39748		0.136971	-1.08714	0.625511	0.48283	-6.56868	0.0296012	0.401736	-5.95383	0.0315	0.345858	-4.56929	0.151448	0.264765	-3.98049	0.110232	-0.0810935	-0.278534	0.875516	88.6691
sp	Homo sapiens	O75084	FZD7_HUMAN	FZD7	Frizzled-7	integral component of membrane [GO:0016021]; intracellular membrane-bounded organelle [GO:0043231]; plasma membrane [GO:0005886]; recycling endosome membrane [GO:0055038]	TRUE	3	112.18	73400000	4327200	4001900	4227700	2931700	3238800	3576300	3247600	2978500	3302800	3429200	4415500	3727800	4185600	3.24893e+06	3176300	3857500	0.0131481	0.0210031	1.31776		-0.365468	-6.70625	0.039388	-0.398087	-7.5112	0.0178143	-0.117768	-1.54204	0.428224	-0.032619	-0.373794	0.862169	0.2477	-4.07346	0.104468	0.280319	-4.84943	0.0867464	119.632
sp	Homo sapiens	O75094	SLIT3_HUMAN	SLIT3	Slit homolog 3 protein	extracellular space [GO:0005615]; mitochondrion [GO:0005739]	TRUE	6	139.18	15700000	4586100	3945700	4236700	1535900	1638300	1697600	1467700	1215000	1453900	1058100	1275200	1168100	4.25617e+06	1.62393e+06	1.37887e+06	1.16713e+06	2.74978e-07	1.46e-05	3.64668	1	-1.39006	-25.9728	2.8637e-06	-1.62607	-28.6225	3.87893e-07	-1.86659	-30.9445	6.74557e-08	-0.236009	-4.39024	0.164482	-0.476523	-10.2662	0.00321392	-0.240514	-4.39024	0.110109	217.709
sp	Homo sapiens	O75096	LRP4_HUMAN	LRP4	Low-density lipoprotein receptor-related protein 4	cell surface [GO:0009986]; dendrite [GO:0030425]; integral component of membrane [GO:0016021]; neuromuscular junction [GO:0031594]; neuronal cell body [GO:0043025]; plasma membrane [GO:0005886]; plasma membrane raft [GO:0044853]; postsynaptic density [GO:0014069]; synaptic membrane [GO:0097060]	TRUE	36	298.76	841000000	24541000	26322000	25880000	14391000	16308000	14109000	9444000	9090200	9595100	9183100	11467000	11508000	25581000	14936000	9.37643e+06	1.07194e+07	1.28127e-06	3.42196e-05	2.72822	1	-0.776279	-15.1354	0.000591877	-1.44796	-25.7404	1.41946e-06	-1.25485	-23.2309	2.18614e-06	-0.671683	-14.8085	0.0039444	-0.478574	-10.5184	0.00282946	0.193109	-3.37038	0.187319	161.953
sp	Homo sapiens	O75110	ATP9A_HUMAN	ATP9A	Probable phospholipid-transporting ATPase IIA	early endosome [GO:0005769]; early endosome membrane [GO:0031901]; endosome [GO:0005768]; integral component of membrane [GO:0016021]; perinuclear region of cytoplasm [GO:0048471]; plasma membrane [GO:0005886]; recycling endosome [GO:0055037]; trans-Golgi network [GO:0005802]	TRUE	13	233.51	224000000	4417100	3819100	4219700	6343400	6367900	6638300	7088100	6363600	7595000	5520500	7033100	6525800	4.15197e+06	6.44987e+06	7.01557e+06	6359800	0.000292865	0.0010483	1.6897	3	0.635474	-14.4342	0.000864619	0.756765	-17.1144	0.000113542	0.615187	-12.9762	0.000507724	0.12129	-2.12666	0.424968	-0.0202879	-0.893253	0.627105	-0.141578	-3.62195	0.164085	73.6883
sp	Homo sapiens	O75113	N4BP1_HUMAN	N4BP1	NEDD4-binding protein 1	nucleolus [GO:0005730]; nucleus [GO:0005634]; PML body [GO:0016605]	FALSE	3	97.11	10200000	615530	695890	614360	664480	625560	680640	727360	689420	693520	686910	808900	728020	641927	656893	703433	741277					0.0332506	-1.06868	0.630561	0.132005	-3.58425	0.152481	0.207604	-5.59194	0.0389964	0.0987546	-1.87793	0.469956	0.174353	-3.66615	0.13181	0.0755984	-1.12709	0.593303	89.7428
sp	Homo sapiens	O75116	ROCK2_HUMAN	ROCK2	Rho-associated protein kinase 2	centrosome [GO:0005813]; cytoplasm [GO:0005737]; cytoplasmic ribonucleoprotein granule [GO:0036464]; cytoskeleton [GO:0005856]; cytosol [GO:0005829]; nucleus [GO:0005634]; plasma membrane [GO:0005886]	TRUE	23	227.92	202000000	7730700	9249500	7899200	6383400	6623100	7969900	8900700	7761200	8339000	9475100	10482000	9133000	8.29313e+06	6.99213e+06	8.33363e+06	9696700	0.0153266	0.0240185	1.3868		-0.246185	-4.81344	0.103386	0.00702834	-0.227805	0.897316	0.225577	-4.13092	0.0940109	0.253213	-5.31476	0.112928	0.471761	-10.4232	0.00298003	0.218548	-3.65117	0.161611	92.8178
sp	Homo sapiens	O75121	MFA3L_HUMAN	MFAP3L	Microfibrillar-associated protein 3-like	cell junction [GO:0030054]; cytoplasm [GO:0005737]; integral component of membrane [GO:0016021]; nucleoplasm [GO:0005654]; nucleus [GO:0005634]; plasma membrane [GO:0005886]	TRUE	1	69.99	0	37484	33150	43644	49919	33351	41584	42106	32386	53371	31246	38192	39439	38092.7	41618	42621	36292.3					0.127694	-0.674287	0.752581	0.162051	-1.28307	0.529942	-0.0698485	-0.495726	0.768535	0.0343568	-0.452804	0.845221	-0.197543	-1.33868	0.493132	-0.2319	-2.05523	0.370506	94.5229
sp	Homo sapiens	O75122	CLAP2_HUMAN	CLASP2	CLIP-associating protein 2	axonal growth cone [GO:0044295]; basal cortex [GO:0045180]; cell cortex [GO:0005938]; cell leading edge [GO:0031252]; condensed chromosome kinetochore [GO:0000777]; cortical microtubule plus-end [GO:1903754]; cytoplasm [GO:0005737]; cytoplasmic microtubule [GO:0005881]; cytosol [GO:0005829]; Golgi apparatus [GO:0005794]; kinetochore microtubule [GO:0005828]; membrane [GO:0016020]; microtubule [GO…	TRUE	14	215.26	45800000	2178700	2220900	2122600	1956800	2084300	2210200	2550500	2334700	2303300	2477600	2677300	2411200	2.17407e+06	2.08377e+06	2.39617e+06	2.52203e+06	0.00616218	0.0111863	1.21032		-0.0612024	-0.967768	0.659114	0.140332	-2.75986	0.240329	0.214191	-4.61862	0.0700689	0.201535	-4.45062	0.15963	0.275394	-6.43533	0.0273096	0.0738591	-1.08026	0.607838	94.9735
sp	Homo sapiens	O75127	PTCD1_HUMAN	PTCD1	Pentatricopeptide repeat-containing protein 1 mitochondrial	mitochondrial matrix [GO:0005759]; mitochondrion [GO:0005739]	FALSE	3	73.44	10000000	612870	974440	676100	753790	628760	712730	710740	668490	817100	595800	784180	609840	754470	698427	732110	663273					-0.111355	-0.847374	0.696594	-0.0434031	-0.235472	0.894025	-0.18586	-1.60566	0.412469	0.0679518	-0.540206	0.822334	-0.0745051	-0.540206	0.766445	-0.142457	-1.23116	0.562239	86.0688
sp	Homo sapiens	O75128	COBL_HUMAN	COBL	Protein cordon-bleu	actin filament [GO:0005884]; axon [GO:0030424]; axonal growth cone [GO:0044295]; cell cortex [GO:0005938]; dendrite [GO:0030425]; dendritic growth cone [GO:0044294]; membrane [GO:0016020]; neuronal cell body [GO:0043025]; perinuclear region of cytoplasm [GO:0048471]; plasma membrane [GO:0005886]; ruffle [GO:0001726]; terminal web [GO:1990357]	TRUE	4	102.75	748000	165060	179290	184040	189470	184800	176090	194180	213100	209850	202690	215490	202400	176130	183453	205710	206860	0.00518499	0.00966766	1.17447		0.0587725	-0.861549	0.691809	0.223971	-6.81786	0.0258457	0.232014	-5.69335	0.0368028	0.165199	-5.15778	0.120946	0.173242	-4.0674	0.104783	0.00804277	-0.544793	0.796352	85.5063
sp	Homo sapiens	O75129	ASTN2_HUMAN	ASTN2	Astrotactin-2	cell cortex [GO:0005938]; cell pole [GO:0060187]; clathrin-coated vesicle [GO:0030136]; early endosome [GO:0005769]; endosome [GO:0005768]; integral component of membrane [GO:0016021]; late endosome [GO:0005770]; perikaryon [GO:0043204]	FALSE	1	28.78	135000000	307850	316520	246530	270980	290810	282840	320160	338900	282640	378270	445350	455550	290300	281543	313900	426390					-0.0441876	-0.638172	0.764969	0.11276	-1.95194	0.372956	0.554629	-11.2489	0.00137293	0.156948	-3.03537	0.285643	0.598817	-12.4203	0.00105957	0.441869	-8.15903	0.0155567	93.8472
sp	Homo sapiens	O75131	CPNE3_HUMAN	CPNE3	Copine-3	azurophil granule membrane [GO:0035577]; cell junction [GO:0030054]; cytoplasm [GO:0005737]; cytosol [GO:0005829]; extracellular exosome [GO:0070062]; focal adhesion [GO:0005925]; mitochondrion [GO:0005739]; nucleolus [GO:0005730]; nucleoplasm [GO:0005654]; nucleus [GO:0005634]; plasma membrane [GO:0005886]	TRUE	11	168.97	249000000	6578100	8140300	7272700	6804500	6495100	7149000	8498000	7822400	7438000	8707700	8965200	9116200	7.33037e+06	6816200	7.91947e+06	8929700	0.00685056	0.0122116	1.31007		-0.104918	-1.30707	0.564811	0.111518	-1.89067	0.384979	0.284726	-7.01624	0.0165706	0.216436	-3.92896	0.195713	0.389644	-9.3356	0.00544393	0.173208	-3.92896	0.139767	84.8904
sp	Homo sapiens	O75143	ATG13_HUMAN	ATG13	Autophagy-related protein 13	Atg1/ULK1 kinase complex [GO:1990316]; cytosol [GO:0005829]; endoplasmic reticulum membrane [GO:0005789]; extrinsic component of membrane [GO:0019898]; mitochondrion [GO:0005739]; phagophore assembly site [GO:0000407]	FALSE	1	37.02	0	34958	29861	31303	32088	25078	26643	26481	22016	26308	25714	35102	28920	32040.7	27936.3	24935	29912					-0.197761	-2.39612	0.332947	-0.361732	-5.49045	0.0537607	-0.0991798	-0.925493	0.604462	-0.16397	-2.03903	0.440863	0.0985817	-1.07101	0.570896	0.262552	-3.77838	0.151719	121.779
sp	Homo sapiens	O75144	ICOSL_HUMAN	ICOSLG	ICOS ligand	cytoplasmic ribonucleoprotein granule [GO:0036464]; external side of plasma membrane [GO:0009897]; extracellular exosome [GO:0070062]; integral component of membrane [GO:0016021]; plasma membrane [GO:0005886]	TRUE	3	109.85	105000000	4475500	3585600	3914500	4223200	3844500	3825700	2909000	1944900	1976900	1136500	1307900	1047700	3.99187e+06	3.96447e+06	2.27693e+06	1.16403e+06	1.42555e-05	0.000130822	3.42934	2	-0.00993674	-0.0665746	0.976373	-0.809971	-12.8701	0.00102885	-1.77793	-24.5208	1.22193e-06	-0.800035	-13.0069	0.00741866	-1.76799	-24.6011	5.85943e-06	-0.96796	-15.0115	0.000713287	157.072
sp	Homo sapiens	O75146	HIP1R_HUMAN	HIP1R	Huntingtin-interacting protein 1-related protein	apical plasma membrane [GO:0016324]; cell cortex [GO:0005938]; clathrin-coated pit [GO:0005905]; clathrin-coated vesicle [GO:0030136]; clathrin-coated vesicle membrane [GO:0030665]; cytoskeleton [GO:0005856]; cytosol [GO:0005829]; dendrite cytoplasm [GO:0032839]; dendritic spine [GO:0043197]; intracellular membrane-bounded organelle [GO:0043231]; mitochondrion [GO:0005739]; neuronal cell body [GO…	TRUE	20	259.66	97900000	7037500	7157900	7074500	6954900	7167900	8087800	8597100	7223600	8239700	6249500	7629700	6654600	7.08997e+06	7.40353e+06	8.02013e+06	6844600	0.162981	0.189493	1.17175		0.0624351	-0.583479	0.785294	0.177847	-3.39266	0.16912	-0.0508126	-0.300284	0.85384	0.115412	-2.34967	0.385764	-0.113248	-0.979572	0.599285	-0.22866	-4.00573	0.134579	95.8845
sp	Homo sapiens	O75147	OBSL1_HUMAN	OBSL1	Obscurin-like protein 1	3M complex [GO:1990393]; centrosome [GO:0005813]; cytoplasm [GO:0005737]; cytosol [GO:0005829]; Golgi apparatus [GO:0005794]; intercalated disc [GO:0014704]; M band [GO:0031430]; perinuclear region of cytoplasm [GO:0048471]; synapse [GO:0045202]; Z disc [GO:0030018]	FALSE	2	85.4	2870000	169400	153060	163930	131100	127750	156710	153750	132210	146720	156020	172750	204830	162130	138520	144227	177867					-0.227057	-3.57477	0.190216	-0.168813	-2.83925	0.230504	0.133645	-1.84494	0.359857	0.0582436	-0.380514	0.861341	0.360702	-6.57716	0.0251702	0.302458	-5.76017	0.0536486	108.809
sp	Homo sapiens	O75150	BRE1B_HUMAN	RNF40	E3 ubiquitin-protein ligase BRE1B	axon terminus [GO:0043679]; cytosol [GO:0005829]; extrinsic component of membrane [GO:0019898]; HULC complex [GO:0033503]; membrane [GO:0016020]; neuron projection [GO:0043005]; nucleoplasm [GO:0005654]; nucleus [GO:0005634]; ubiquitin ligase complex [GO:0000151]	FALSE	12	184.36	49100000	3284000	3883500	3497000	2728600	2684700	2857000	3016900	2839400	2987700	3016500	3431700	3309600	3.55483e+06	2.75677e+06	2948000	3252600					-0.366805	-8.20031	0.0186964	-0.270045	-6.22051	0.035993	-0.128189	-1.68322	0.394587	0.0967594	-1.06304	0.658144	0.238616	-5.34311	0.050662	0.141857	-3.44248	0.18081	104.986
sp	Homo sapiens	O75152	ZC11A_HUMAN	ZC3H11A	Zinc finger CCCH domain-containing protein 11A	nucleoplasm [GO:0005654]	FALSE	14	249.04	90600000	3900000	4039200	3866600	4415400	4354200	3986900	4389600	4593800	4808700	5477600	5857900	5460700	3.93527e+06	4.25217e+06	4.59737e+06	5.59873e+06					0.111737	-2.59057	0.303801	0.224346	-5.77642	0.0459473	0.508639	-15.1706	0.000146101	0.11261	-2.08435	0.43242	0.396902	-11.7534	0.00148233	0.284293	-8.53753	0.012868	84.8586
sp	Homo sapiens	O75153	CLU_HUMAN	CLUH	Clustered mitochondria protein homolog	cytoplasm [GO:0005737]	FALSE	27	273.49	226000000	9420600	9881100	9817900	8849200	9156600	9822100	10418000	9714600	10333000	9767000	10558000	9579400	9.70653e+06	9.27597e+06	10155200	9.96813e+06					-0.0654585	-1.72958	0.461448	0.0651906	-1.09292	0.58256	0.0383672	-0.36609	0.823217	0.130649	-3.43993	0.240179	0.103826	-2.35624	0.279335	-0.0268234	-0.608176	0.77041	96.36
sp	Homo sapiens	O75157	T22D2_HUMAN	TSC22D2	TSC22 domain family protein 2	0	FALSE	1	71.72	9970000	125240	126440	114700	154120	140360	153070	161910	165050	216200	233590	197540	207480	122127	149183	181053	212870					0.288708	-5.43466	0.0759092	0.568036	-11.8523	0.00171357	0.801594	-17.2533	4.62196e-05	0.279328	-5.01206	0.128696	0.512886	-11.4613	0.00171496	0.233558	-5.01206	0.0801238	75.3059
sp	Homo sapiens	O75165	DJC13_HUMAN	DNAJC13	DnaJ homolog subfamily C member 13	azurophil granule membrane [GO:0035577]; cytosol [GO:0005829]; early endosome membrane [GO:0031901]; endosome membrane [GO:0010008]; extracellular exosome [GO:0070062]; intracellular membrane-bounded organelle [GO:0043231]; lysosomal membrane [GO:0005765]; membrane [GO:0016020]; plasma membrane [GO:0005886]; secretory granule membrane [GO:0030667]	TRUE	38	294.38	629000000	14697000	14825000	14116000	15971000	17046000	17651000	19267000	18358000	19370000	12987000	15016000	14648000	14546000	1.68893e+07	1.89983e+07	14217000	0.000324005	0.00113249	1.33631		0.21549	-4.62786	0.113101	0.38525	-9.9315	0.00475813	-0.0330054	-1.33082	0.483415	0.16976	-3.82326	0.204412	-0.248495	-6.98837	0.0199918	-0.418256	-12.1414	0.00231902	90.9318
sp	Homo sapiens	O75167	PHAR2_HUMAN	PHACTR2	Phosphatase and actin regulator 2	plasma membrane [GO:0005886]; platelet alpha granule membrane [GO:0031092]	TRUE	1	52.82	3700000	249870	249850	239050	350940	338020	321530	347170	382560	368770	460190	487410	476610	246257	336830	366167	474737					0.451858	-14.7331	0.000735747	0.572338	-17.5884	8.67631e-05	0.946965	-26.2316	5.6511e-07	0.12048	-2.36009	0.384638	0.495107	-16.0204	0.000190263	0.374627	-12.9606	0.00161525	70.1887
sp	Homo sapiens	O75170	PP6R2_HUMAN	PPP6R2	Serine/threonine-protein phosphatase 6 regulatory subunit 2	cytosol [GO:0005829]; intracellular membrane-bounded organelle [GO:0043231]; nucleus [GO:0005634]	FALSE	4	166.94	14600000	1348900	1688400	1261600	1547300	1631500	1748100	1947400	1756600	1853900	1192800	1426600	1292700	1.43297e+06	1642300	1.85263e+06	1.30403e+06					0.196713	-2.94797	0.255559	0.370572	-7.10412	0.0221827	-0.136024	-2.75613	0.210585	0.17386	-2.85162	0.309897	-0.332737	-6.99424	0.0199185	-0.506597	-11.1698	0.00354547	86.5799
sp	Homo sapiens	O75175	CNOT3_HUMAN	CNOT3	CCR4-NOT transcription complex subunit 3	CCR4-NOT complex [GO:0030014]; CCR4-NOT core complex [GO:0030015]; cytosol [GO:0005829]; nucleus [GO:0005634]; P-body [GO:0000932]	FALSE	8	160.45	31200000	2054500	2636000	2441900	2795300	2680500	2670700	3307800	3829200	3613900	4421300	3714600	4521100	2.37747e+06	2715500	3.58363e+06	4219000					0.191793	-3.24166	0.223478	0.591998	-13.5267	0.000726358	0.827476	-17.4582	4.1646e-05	0.400205	-9.17957	0.0278534	0.635683	-13.7384	0.000534969	0.235478	-3.46789	0.178143	63.7272
sp	Homo sapiens	O75179	ANR17_HUMAN	ANKRD17	Ankyrin repeat domain-containing protein 17	chromatin [GO:0000785]; cytoplasm [GO:0005737]; membrane [GO:0016020]; nuclear membrane [GO:0031965]; nucleoplasm [GO:0005654]; nucleus [GO:0005634]	FALSE	9	213.52	63100000	1679100	1690800	1700900	1684600	1558500	1753500	1818300	1851500	1782900	1485700	1729000	1533500	1.69027e+06	1.66553e+06	1.81757e+06	1.58273e+06					-0.0212666	-0.498991	0.814421	0.104757	-2.28212	0.312166	-0.0948327	-3.06791	0.175417	0.126024	-3.17986	0.268884	-0.073566	-2.18003	0.308603	-0.19959	-6.5675	0.0345629	99.4124
sp	Homo sapiens	O75190	DNJB6_HUMAN	DNAJB6	DnaJ homolog subfamily B member 6	cytosol [GO:0005829]; membrane [GO:0016020]; nucleoplasm [GO:0005654]; nucleus [GO:0005634]; perinuclear region of cytoplasm [GO:0048471]; Z disc [GO:0030018]	FALSE	1	97.16	2230000	124870	123070	121070	136470	134730	125740	118260	118270	134140	120410	147220	99609	123003	132313	123557	122413					0.105261	-1.1566	0.604832	0.00647544	-0.302513	0.865651	-0.00694064	-0.0279457	0.985118	-0.0987856	-0.736846	0.745475	-0.112202	-1.20152	0.5316	-0.0134161	-0.33584	0.853271	99.6397
sp	Homo sapiens	O75197	LRP5_HUMAN	LRP5	Low-density lipoprotein receptor-related protein 5	endoplasmic reticulum [GO:0005783]; integral component of membrane [GO:0016021]; plasma membrane [GO:0005886]; receptor complex [GO:0043235]; Wnt-Frizzled-LRP5/6 complex [GO:1990851]; Wnt signalosome [GO:1990909]	TRUE	23	280.79	640000000	32519000	29906000	33208000	21505000	22453000	22731000	14934000	13011000	13964000	15099000	17538000	14533000	3.18777e+07	2.22297e+07	1.39697e+07	1.57233e+07	1.67575e-06	3.93359e-05	2.28192	1	-0.52006	-13.1994	0.00161537	-1.19025	-25.7809	1.40784e-06	-1.01964	-22.8967	2.5263e-06	-0.670189	-16.689	0.00192696	-0.499579	-12.103	0.00124581	0.17061	-4.00937	0.1343	155.221
sp	Homo sapiens	O75208	COQ9_HUMAN	COQ9	Ubiquinone biosynthesis protein COQ9 mitochondrial	mitochondrial inner membrane [GO:0005743]; mitochondrion [GO:0005739]	FALSE	3	75.35	35100000	1830700	1960900	1962100	1448800	1801400	1866400	1576300	1669500	1610000	1994400	2473300	2015000	1917900	1.70553e+06	1618600	2160900					-0.169305	-2.82032	0.271785	-0.244781	-4.38155	0.0984385	0.172105	-2.06857	0.315695	-0.0754765	-0.878811	0.70444	0.341409	-6.02267	0.034552	0.416886	-7.7166	0.0193301	98.9175
sp	Homo sapiens	O75251	NDUS7_HUMAN	NDUFS7	NADH dehydrogenase [ubiquinone] iron-sulfur protein 7 mitochondrial	mitochondrial matrix [GO:0005759]; mitochondrial respiratory chain complex I [GO:0005747]; neuronal cell body [GO:0043025]; neuron projection [GO:0043005]; synaptic membrane [GO:0097060]	FALSE	5	117.73	196000000	2107100	2439400	1911500	2806000	2783200	2962800	3062500	3393200	3359000	2335100	2446600	2465700	2.15267e+06	2.85067e+06	3.27157e+06	2415800					0.405174	-9.72245	0.00888156	0.603857	-14.8528	0.000365422	0.166376	-3.14806	0.167359	0.198682	-4.2012	0.176856	-0.238798	-5.13456	0.0567747	-0.437481	-10.801	0.00418394	78.8386
sp	Homo sapiens	O75306	NDUS2_HUMAN	NDUFS2	NADH dehydrogenase [ubiquinone] iron-sulfur protein 2 mitochondrial	mitochondrial matrix [GO:0005759]; mitochondrial respiratory chain complex I [GO:0005747]; mitochondrion [GO:0005739]; nucleoplasm [GO:0005654]	FALSE	2	69.6	32600000	3107900	3185600	2715700	2774400	2906500	2967400	2887700	4246600	4022500	4231500	2790800	4707500	3.00307e+06	2.88277e+06	3.71893e+06	3.90993e+06					-0.0589824	-0.488961	0.816823	0.308452	-2.60705	0.261798	0.380708	-3.50154	0.136204	0.367435	-3.51606	0.233045	0.43969	-4.46746	0.0832863	0.0722551	-0.480445	0.819	91.9858
sp	Homo sapiens	O75309	CAD16_HUMAN	CDH16	Cadherin-16	basolateral plasma membrane [GO:0016323]; extracellular exosome [GO:0070062]; integral component of plasma membrane [GO:0005887]	TRUE	2	51.27	5230000	761910	693120	757540	367770	370860	330440	119880	94001	107360	77974	80020	64551	737523	356357	107080	74181.7	5.589e-09	1.38483e-06	9.94212	1	-1.04937	-19.9301	5.21845e-05	-2.784	-36.4704	8.41816e-09	-3.31355	-39.3844	9.18153e-10	-1.73463	-28.3891	1.82399e-05	-2.26419	-32.7368	1.11984e-07	-0.529559	-10.0152	0.00619624	239.004
sp	Homo sapiens	O75312	ZPR1_HUMAN	ZPR1	Zinc finger protein ZPR1	axon [GO:0030424]; Cajal body [GO:0015030]; cytoplasm [GO:0005737]; Gemini of coiled bodies [GO:0097504]; growth cone [GO:0030426]; neuronal cell body [GO:0043025]; nucleolus [GO:0005730]; nucleoplasm [GO:0005654]; nucleus [GO:0005634]; perikaryon [GO:0043204]; perinuclear region of cytoplasm [GO:0048471]	FALSE	2	62.42	1700000	421550	437040	403110	336350	360580	413680	487430	412610	460000	486410	509160	435400	420567	370203	453347	476990					-0.184017	-2.42382	0.329008	0.10828	-1.89951	0.383368	0.181625	-3.37538	0.146243	0.292297	-5.34761	0.111448	0.365641	-7.08032	0.0190439	0.0733443	-0.905009	0.661042	97.9718
sp	Homo sapiens	O75323	NIPS2_HUMAN	NIPSNAP2	Protein NipSnap homolog 2	mitochondrial outer membrane [GO:0005741]; mitochondrion [GO:0005739]	FALSE	4	91.69	88200000	1159400	995320	1168300	1054100	1131400	1224400	1052300	979950	1164300	913070	1107800	914890	1.10767e+06	1.13663e+06	1.06552e+06	978587					0.0372345	-0.268147	0.897275	-0.0559793	-0.46861	0.799465	-0.178761	-2.71835	0.215455	-0.0932138	-0.808192	0.723882	-0.215995	-3.24284	0.16855	-0.122782	-1.90794	0.401769	108.143
sp	Homo sapiens	O75334	LIPA2_HUMAN	PPFIA2	Liprin-alpha-2	axon [GO:0030424]; cell surface [GO:0009986]; cytoplasm [GO:0005737]; cytosol [GO:0005829]; dendritic spine [GO:0043197]; extracellular exosome [GO:0070062]; glutamatergic synapse [GO:0098978]; presynaptic active zone [GO:0048786]	TRUE	1	148.63	5610000	770740	825340	670100	801320	724750	875050	954040	1092000	1156600	1178800	1280400	1287600	755393	800373	1.06755e+06	1.24893e+06					0.083445	-0.692254	0.74494	0.498999	-11.9708	0.00159747	0.725397	-17.3952	4.29042e-05	0.415554	-10.6946	0.0169688	0.641951	-16.3643	0.000159703	0.226397	-5.07451	0.0777005	79.6168
sp	Homo sapiens	O75351	VPS4B_HUMAN	VPS4B	Vacuolar protein sorting-associated protein 4B	centrosome [GO:0005813]; cytoplasm [GO:0005737]; cytosol [GO:0005829]; endosome [GO:0005768]; endosome membrane [GO:0010008]; extracellular exosome [GO:0070062]; Flemming body [GO:0090543]; late endosome membrane [GO:0031902]; nucleus [GO:0005634]; spindle pole [GO:0000922]	TRUE	2	103.69	14000000	454370	471670	445800	399560	381140	494890	619370	566110	527220	615490	612280	609900	457280	425197	570900	612557	0.00152038	0.00373398	1.44064		-0.104948	-2.62908	0.298269	0.32016	-6.09713	0.0386722	0.421765	-8.79457	0.00570522	0.425108	-10.0841	0.0203647	0.526713	-12.5783	0.000981679	0.101605	-1.56766	0.473142	87.9738
sp	Homo sapiens	O75354	ENTP6_HUMAN	ENTPD6	Ectonucleoside triphosphate diphosphohydrolase 6	cell surface [GO:0009986]; extracellular region [GO:0005576]; extracellular space [GO:0005615]; Golgi apparatus [GO:0005794]; Golgi membrane [GO:0000139]; integral component of membrane [GO:0016021]; plasma membrane [GO:0005886]	TRUE	4	128.43	46300000	3146400	2776500	3194300	5313000	5399100	5762900	6759600	4994800	5328100	3124900	3672500	3133000	3.03907e+06	5.49167e+06	5.69417e+06	3.31013e+06	9.40573e-05	0.000470286	1.87366	3	0.853616	-17.0439	0.000230363	0.905856	-17.6051	8.61414e-05	0.123261	-1.81538	0.365904	0.0522407	-0.355491	0.864526	-0.730355	-14.6809	0.000351249	-0.782595	-15.3015	0.000656075	71.774
sp	Homo sapiens	O75362	ZN217_HUMAN	ZNF217	Zinc finger protein 217	histone deacetylase complex [GO:0000118]; mitochondrion [GO:0005739]; nuclear speck [GO:0016607]; nucleoplasm [GO:0005654]; nucleus [GO:0005634]	FALSE	2	56.16	2040000	220130	218840	215680	143260	150960	145020	123390	128140	141100	129220	169900	129010	218217	146413	130877	142710					-0.575714	-12.8069	0.00198852	-0.737553	-15.6194	0.000240785	-0.612675	-12.8069	0.000558923	-0.161839	-2.08415	0.43242	-0.0369605	0	1	0.124879	-2.08415	0.364467	137.966
sp	Homo sapiens	O75363	BCAS1_HUMAN	BCAS1	Breast carcinoma-amplified sequence 1	cytoplasm [GO:0005737]; extracellular exosome [GO:0070062]; postsynaptic density [GO:0014069]	TRUE	2	51.23	2500000	430590	430240	527930	589300	629560	664770	613890	619630	663440	585490	602620	598550	462920	627877	632320	595553	0.00163862	0.00394614	1.36594		0.439718	-12.1819	0.00272191	0.449892	-11.2615	0.00233415	0.363468	-10.3147	0.00235814	0.0101737	-0.482248	0.840208	-0.0762505	-1.0885	0.565604	-0.0864241	-0.482248	0.818346	74.2822
sp	Homo sapiens	O75367	H2AY_HUMAN	MACROH2A1	Core histone macro-H2A.1	Barr body [GO:0001740]; condensed chromosome [GO:0000793]; extracellular exosome [GO:0070062]; nuclear chromatin [GO:0000790]; nuclear chromosome [GO:0000228]; nuclear chromosome, telomeric region [GO:0000784]; nucleolus [GO:0005730]; nucleoplasm [GO:0005654]; nucleosome [GO:0000786]; nucleus [GO:0005634]; pericentric heterochromatin [GO:0005721]; sex chromatin [GO:0001739]	TRUE	3	87.88	4220000	435240	461200	389080	783490	830900	812410	659200	725490	702470	806900	1020300	1018300	428507	808933	695720	948500	1.75298e-05	0.000146209	2.2135	4	0.916703	-18.7852	9.37407e-05	0.699189	-14.5645	0.000431686	1.14633	-22.3125	3.33599e-06	-0.217514	-4.07234	0.184042	0.229627	-4.07234	0.104511	0.447141	-9.62916	0.00743534	60.4152
sp	Homo sapiens	O75369	FLNB_HUMAN	FLNB	Filamin-B	actin cytoskeleton [GO:0015629]; brush border [GO:0005903]; cell cortex [GO:0005938]; cytoplasm [GO:0005737]; cytosol [GO:0005829]; extracellular exosome [GO:0070062]; focal adhesion [GO:0005925]; integral component of membrane [GO:0016021]; neuronal cell body [GO:0043025]; neuron projection [GO:0043005]; nucleus [GO:0005634]; phagocytic vesicle [GO:0045335]; plasma membrane [GO:0005886]; stress …	TRUE	82	423.58	2360000000	66751000	78029000	76957000	49710000	54062000	64785000	77272000	76038000	74485000	107740000	97512000	96780000	7.39123e+07	5.61857e+07	7.59317e+07	1.00677e+08	0.000260341	0.000947079	1.79187	5	-0.395613	-9.53152	0.00976832	0.0388866	-0.865857	0.653977	0.445852	-10.104	0.00265912	0.4345	-11.1182	0.0153161	0.841465	-19.1336	4.86813e-05	0.406965	-8.47834	0.0132978	87.0551
sp	Homo sapiens	O75376	NCOR1_HUMAN	NCOR1	Nuclear receptor corepressor 1	cytosol [GO:0005829]; histone deacetylase complex [GO:0000118]; membrane [GO:0016020]; mitotic spindle [GO:0072686]; nuclear chromatin [GO:0000790]; nucleoplasm [GO:0005654]; nucleus [GO:0005634]; transcription repressor complex [GO:0017053]	FALSE	9	139.99	22600000	1029200	1347100	1015200	864590	983140	975340	1056800	1060900	1012800	983730	1137300	1147700	1130500	941023	1043500	1.08958e+06					-0.264659	-5.47587	0.0742281	-0.11553	-2.41737	0.290421	-0.0531933	-1.17195	0.528268	0.149128	-2.00716	0.444802	0.211465	-3.41512	0.152136	0.0623371	-0.84684	0.680229	97.9118
sp	Homo sapiens	O75381	PEX14_HUMAN	PEX14	Peroxisomal membrane protein PEX14	fibrillar center [GO:0001650]; integral component of membrane [GO:0016021]; membrane [GO:0016020]; nucleus [GO:0005634]; peroxisomal importomer complex [GO:1990429]; peroxisomal membrane [GO:0005778]; peroxisome [GO:0005777]; protein-containing complex [GO:0032991]	FALSE	2	73.19	3880000	289500	323280	315300	273450	273050	285990	311150	342700	337110	518080	472300	548680	309360	277497	330320	513020					-0.156816	-2.35356	0.340273	0.0945777	-1.59451	0.449846	0.729728	-17.2774	4.55547e-05	0.251394	-4.86881	0.13513	0.886545	-19.8363	3.53183e-05	0.635151	-15.1754	0.000679357	80.9679
sp	Homo sapiens	O75382	TRIM3_HUMAN	TRIM3	Tripartite motif-containing protein 3	cytoplasm [GO:0005737]; dendrite [GO:0030425]; early endosome [GO:0005769]; Golgi apparatus [GO:0005794]	FALSE	6	160.42	21700000	1037600	1139900	1078300	1004900	881820	1084000	1109500	1017500	1121500	1200300	1210800	1107000	1.08527e+06	990240	1.08283e+06	1172700					-0.132199	-3.21631	0.225667	-0.00323837	-0.418272	0.81895	0.111784	-2.81003	0.204536	0.128961	-4.04065	0.186597	0.243984	-7.35745	0.0162918	0.115023	-2.06621	0.368228	95.8292
sp	Homo sapiens	O75385	ULK1_HUMAN	ULK1	Serine/threonine-protein kinase ULK1	Atg1/ULK1 kinase complex [GO:1990316]; autophagosome [GO:0005776]; axon [GO:0030424]; cytoplasm [GO:0005737]; cytosol [GO:0005829]; endoplasmic reticulum membrane [GO:0005789]; extrinsic component of autophagosome membrane [GO:0097635]; extrinsic component of omegasome membrane [GO:0097629]; extrinsic component of phagophore assembly site membrane [GO:0097632]; mitochondrial outer membrane [GO:00…	FALSE	2	60.42	1980000	134980	150170	141710	128930	137190	153630	148110	117940	147590	123230	130990	109200	142287	139917	137880	121140					-0.0242327	-0.0117631	0.995061	-0.0453873	-0.331119	0.853788	-0.232125	-3.68037	0.122734	-0.0211546	-0.345355	0.866655	-0.207893	-3.70659	0.129042	-0.186738	-3.02487	0.223174	99.7592
sp	Homo sapiens	O75387	LAT3_HUMAN	SLC43A1	Large neutral amino acids transporter small subunit 3	integral component of plasma membrane [GO:0005887]; plasma membrane [GO:0005886]	TRUE	3	79.08	33800000	749660	817090	707600	665800	684240	671440	650800	569640	641520	465470	562560	442570	758117	673827	620653	490200	0.00106554	0.00282876	1.54655	2	-0.170042	-2.45154	0.324515	-0.288632	-5.7111	0.0476078	-0.629049	-13.9308	0.000297098	-0.11859	-2.16392	0.41825	-0.459007	-10.5066	0.00284543	-0.340417	-7.10177	0.0263441	117.927
sp	Homo sapiens	O75390	CISY_HUMAN	CS	Citrate synthase mitochondrial	extracellular exosome [GO:0070062]; mitochondrial matrix [GO:0005759]; mitochondrion [GO:0005739]; nucleus [GO:0005634]	TRUE	9	173.75	440000000	8528400	10510000	7801800	8977500	9265800	13469000	9813700	8666600	9361100	11724000	12450000	10486000	8.94673e+06	1.05708e+07	9.28047e+06	1.15533e+07	0.202735	0.230781	1.29135		0.240647	-2.38901	0.333917	0.0528363	-0.461698	0.801619	0.368876	-4.94727	0.0576838	-0.187811	-1.62223	0.523325	0.128229	-1.62223	0.419089	0.31604	-4.00921	0.1343	84.5415
sp	Homo sapiens	O75391	SPAG7_HUMAN	SPAG7	Sperm-associated antigen 7	nucleus [GO:0005634]	FALSE	1	48.98	829000	57622	61595	73251	84253	49373	57715	66873	72789	78151	82987	77317	84902	64156	63780.3	72604.3	81735.3					-0.00847256	-0.255205	0.901714	0.178471	-1.80477	0.403791	0.349376	-3.55301	0.132372	0.186944	-2.25431	0.401754	0.357848	-4.08421	0.103854	0.170904	-1.10896	0.598868	81.6534
sp	Homo sapiens	O75396	SC22B_HUMAN	SEC22B	Vesicle-trafficking protein SEC22b	COPI-coated vesicle [GO:0030137]; endoplasmic reticulum [GO:0005783]; endoplasmic reticulum-Golgi intermediate compartment [GO:0005793]; endoplasmic reticulum-Golgi intermediate compartment membrane [GO:0033116]; endoplasmic reticulum membrane [GO:0005789]; ER to Golgi transport vesicle membrane [GO:0012507]; Golgi membrane [GO:0000139]; integral component of membrane [GO:0016021]; melanosome [GO…	FALSE	4	140.54	33200000	1215500	1162300	1223500	1145300	1173800	1232200	1512400	1379600	1242200	1863400	1646000	1660600	1.20043e+06	1.18377e+06	1.37807e+06	1.72333e+06					-0.0201705	-0.225749	0.913415	0.19909	-4.18069	0.109601	0.521646	-14.9171	0.000169206	0.219261	-4.66799	0.146813	0.541817	-15.3232	0.000258148	0.322556	-9.81938	0.00679124	88.6321
sp	Homo sapiens	O75400	PR40A_HUMAN	PRPF40A	Pre-mRNA-processing factor 40 homolog A	cytosol [GO:0005829]; membrane [GO:0016020]; nuclear matrix [GO:0016363]; nuclear speck [GO:0016607]; nucleoplasm [GO:0005654]; U1 snRNP [GO:0005685]; U2-type prespliceosome [GO:0071004]	FALSE	17	199.04	208000000	3746900	4377300	4101700	6811400	6910700	6569900	5373300	4937600	5987800	6670400	7419700	6866600	4075300	6764000	5432900	6.98557e+06					0.73097	-16.9956	0.000234779	0.414816	-9.8746	0.00489601	0.777471	-18.3325	2.56262e-05	-0.316154	-6.77085	0.0641116	0.0465005	-0.983685	0.597799	0.362655	-8.62247	0.0123767	64.4413
sp	Homo sapiens	O75410	TACC1_HUMAN	TACC1	Transforming acidic coiled-coil-containing protein 1	cytoplasm [GO:0005737]; cytosol [GO:0005829]; membrane [GO:0016020]; microtubule organizing center [GO:0005815]; midbody [GO:0030496]; nucleus [GO:0005634]	FALSE	16	221.9	163000000	4943900	4498500	4216400	4218400	4189300	4757500	5115600	4238500	4822000	4592600	5539100	4673100	4.55293e+06	4388400	4.72537e+06	4.93493e+06					-0.0531013	-0.393475	0.85131	0.0536299	-0.857938	0.656722	0.116234	-2.04242	0.320674	0.106731	-1.41902	0.570166	0.169336	-2.74284	0.224068	0.0626043	-0.863158	0.67576	106.311
sp	Homo sapiens	O75414	NDK6_HUMAN	NME6	Nucleoside diphosphate kinase 6	mitochondrion [GO:0005739]	FALSE	1	44.36	1580000	248980	340160	226010	238510	275300	268080	244720	242610	234530	228550	221990	164590	271717	260630	240620	205043					-0.0600999	-0.192464	0.926247	-0.175346	-1.58465	0.451203	-0.406174	-5.15618	0.0508244	-0.115247	-1.27391	0.603322	-0.346074	-4.72958	0.0718018	-0.230828	-2.61102	0.278097	101.831
sp	Homo sapiens	O75419	CDC45_HUMAN	CDC45	Cell division control protein 45 homolog	centrosome [GO:0005813]; ciliary basal body [GO:0036064]; cytoplasm [GO:0005737]; DNA replication preinitiation complex [GO:0031261]; nuclear pre-replicative complex [GO:0005656]; nucleoplasm [GO:0005654]; nucleus [GO:0005634]; replication fork protection complex [GO:0031298]	FALSE	1	31.56	239000	79159	72383	89933	63008	77535	75624	85181	81995	60589	62873	70131	63705	80491.7	72055.7	75921.7	65569.7					-0.159728	-2.73841	0.282982	-0.0843278	-1.22421	0.544996	-0.295811	-4.53065	0.0738791	0.0753998	-1.0371	0.663309	-0.136083	-1.0371	0.580887	-0.211483	-2.49867	0.294744	107.685
sp	Homo sapiens	O75420	GGYF1_HUMAN	GIGYF1	GRB10-interacting GYF protein 1	protein-containing complex [GO:0032991]	FALSE	2	65.08	1450000	207830	529160	207450	175100	164360	204800	205320	185340	229040	187380	221230	177200	314813	181420	206567	195270					-0.795163	-5.34392	0.0797351	-0.607889	-3.45448	0.164012	-0.689026	-4.06764	0.0976741	0.187274	-1.055	0.660266	0.106137	-0.651088	0.719753	-0.0811371	-0.299164	0.867373	92.5674
sp	Homo sapiens	O75436	VP26A_HUMAN	VPS26A	Vacuolar protein sorting-associated protein 26A	cytosol [GO:0005829]; early endosome [GO:0005769]; endosome [GO:0005768]; endosome membrane [GO:0010008]; lysosome [GO:0005764]; retromer, cargo-selective complex [GO:0030906]; retromer complex [GO:0030904]; tubular endosome [GO:0097422]; vesicle [GO:0031982]	FALSE	6	124.92	26100000	659680	716990	679490	692370	618550	809870	939360	902570	881090	1345700	1119600	1134800	685387	706930	907673	1.20003e+06					0.0446492	-0.170256	0.933833	0.405255	-7.59884	0.0169101	0.808084	-16.7894	5.94006e-05	0.360606	-7.2115	0.0556793	0.763435	-16.4976	0.000150644	0.402829	-8.80147	0.0113425	75.3915
sp	Homo sapiens	O75439	MPPB_HUMAN	PMPCB	Mitochondrial-processing peptidase subunit beta	mitochondrial inner membrane [GO:0005743]; mitochondrial processing peptidase complex [GO:0017087]; mitochondrion [GO:0005739]	FALSE	6	124.57	77900000	1733200	2376900	1630800	1215900	1226500	1630300	1384500	1533800	1388600	1650700	1450500	1425300	1.91363e+06	1.35757e+06	1.43563e+06	1.50883e+06					-0.495291	-7.19063	0.0308456	-0.414627	-5.41217	0.0561659	-0.342881	-3.6931	0.121805	0.0806643	-0.933325	0.690136	0.15241	-2.23009	0.300108	0.0717461	-0.933325	0.652096	111.538
sp	Homo sapiens	O75445	USH2A_HUMAN	USH2A	Usherin	apical plasma membrane [GO:0016324]; basement membrane [GO:0005604]; ciliary basal body [GO:0036064]; cytoplasm [GO:0005737]; integral component of membrane [GO:0016021]; periciliary membrane compartment [GO:1990075]; photoreceptor connecting cilium [GO:0032391]; photoreceptor inner segment [GO:0001917]; stereocilia ankle link [GO:0002141]; stereocilia ankle link complex [GO:0002142]; stereociliu…	TRUE	1	28.7	7160000	239180	238420	242250	170540	211870	188070	264430	290070	250260	326770	276900	498010	239950	190160	268253	367227					-0.33552	-4.33264	0.131228	0.160862	-0.990443	0.613557	0.613937	-7.49052	0.0124799	0.496382	-6.17447	0.0807784	0.949457	-13.06	0.000764592	0.453075	-5.62084	0.0575286	89.7831
sp	Homo sapiens	O75448	MED24_HUMAN	MED24	Mediator of RNA polymerase II transcription subunit 24	mediator complex [GO:0016592]; nucleoplasm [GO:0005654]; nucleus [GO:0005634]	FALSE	13	216.13	36200000	2434400	2198200	2251400	3033200	2973100	3131000	3316300	2758600	2945500	1887700	2172300	2112900	2.29467e+06	3.04577e+06	3006800	2.05763e+06					0.408521	-9.45649	0.0101859	0.389944	-9.45649	0.00603104	-0.157299	-2.77534	0.208493	-0.0185765	0	1	-0.56582	-13.3193	0.000666637	-0.547243	-13.3193	0.00141285	93.587
sp	Homo sapiens	O75475	PSIP1_HUMAN	PSIP1	PC4 and SFRS1-interacting protein	cytosol [GO:0005829]; nuclear chromatin [GO:0000790]; nuclear heterochromatin [GO:0005720]; nuclear periphery [GO:0034399]; nucleoplasm [GO:0005654]; nucleus [GO:0005634]; transcriptionally active chromatin [GO:0035327]	FALSE	9	167.66	45800000	1628500	1587700	1614000	1777600	1809000	1786900	1783200	1573800	1746600	2297500	2465700	2296300	1.61007e+06	1.79117e+06	1701200	2.35317e+06					0.153779	-5.64174	0.0682095	0.0794323	-2.28514	0.31181	0.547483	-16.5386	6.81067e-05	-0.0743468	-2.27038	0.399352	0.393704	-10.3701	0.00306585	0.468051	-13.6235	0.00124826	87.3706
sp	Homo sapiens	O75477	ERLN1_HUMAN	ERLIN1	Erlin-1	endoplasmic reticulum [GO:0005783]; endoplasmic reticulum membrane [GO:0005789]; integral component of membrane [GO:0016021]; protein-containing complex [GO:0032991]	FALSE	5	195.42	78100000	1127100	1132600	1294500	1061800	1028100	1090600	1134700	1387000	1241800	1432400	1284700	1510800	1.18473e+06	1.06017e+06	1254500	1409300					-0.160271	-2.3782	0.33597	0.0825501	-0.893752	0.645292	0.250416	-5.57943	0.0392783	0.242821	-3.91002	0.196948	0.410688	-9.29652	0.00555986	0.167866	-3.91002	0.141332	91.8451
sp	Homo sapiens	O75487	GPC4_HUMAN	GPC4	Glypican-4	anchored component of presynaptic membrane [GO:0099026]; cell surface [GO:0009986]; collagen-containing extracellular matrix [GO:0062023]; external side of plasma membrane [GO:0009897]; extracellular exosome [GO:0070062]; extracellular region [GO:0005576]; glutamatergic synapse [GO:0098978]; Golgi lumen [GO:0005796]; lysosomal lumen [GO:0043202]; nucleus [GO:0005634]; plasma membrane [GO:0005886]…	TRUE	4	176.8	51700000	648460	976070	478350	2439500	2288000	2189000	2197700	1797800	2523500	1691100	2499300	2074300	700960	2305500	2173000	2.08823e+06	0.000381755	0.00127862	3.28906	3	1.71768	-18.4032	0.000115603	1.63228	-17.8229	7.59096e-05	1.57488	-17.2267	4.68415e-05	-0.0853915	-0.383758	0.860646	-0.142797	-0.8504	0.642743	-0.0574053	-0.383758	0.841508	35.69
sp	Homo sapiens	O75489	NDUS3_HUMAN	NDUFS3	NADH dehydrogenase [ubiquinone] iron-sulfur protein 3 mitochondrial	mitochondrial matrix [GO:0005759]; mitochondrial membrane [GO:0031966]; mitochondrial respiratory chain complex I [GO:0005747]; mitochondrion [GO:0005739]; nuclear body [GO:0016604]	FALSE	5	114.83	45100000	1390400	2017000	1778200	1468500	1539300	1596400	1659700	2570300	1773400	2937600	1870600	2371900	1.72853e+06	1.53473e+06	2.00113e+06	2.39337e+06					-0.17156	-1.12166	0.615312	0.211269	-1.8344	0.397342	0.469493	-4.74528	0.0650173	0.382829	-3.60634	0.224318	0.641053	-6.80227	0.022131	0.258224	-1.99371	0.382877	72.6269
sp	Homo sapiens	O75503	CLN5_HUMAN	CLN5	Ceroid-lipofuscinosis neuronal protein 5	cytosol [GO:0005829]; endoplasmic reticulum [GO:0005783]; extracellular exosome [GO:0070062]; Golgi apparatus [GO:0005794]; integral component of membrane [GO:0016021]; lysosomal membrane [GO:0005765]; lysosome [GO:0005764]; perinuclear region of cytoplasm [GO:0048471]	TRUE	2	53.52	3120000	620080	544640	617040	510290	562930	575620	493390	440830	438950	475710	805980	607860	593920	549613	457723	629850	0.131987	0.157312	1.37605		-0.111852	-0.838391	0.699512	-0.375793	-5.77796	0.0459342	0.0847397	-0.799879	0.647282	-0.263941	-4.1841	0.177256	0.196591	-1.93586	0.352972	0.460532	-7.34329	0.0231861	111.17
sp	Homo sapiens	O75509	TNR21_HUMAN	TNFRSF21	Tumor necrosis factor receptor superfamily member 21	axon [GO:0030424]; cytoplasm [GO:0005737]; integral component of plasma membrane [GO:0005887]; intrinsic component of plasma membrane [GO:0031226]; plasma membrane [GO:0005886]	TRUE	4	97.69	19400000	3025800	3525100	3486500	2193600	2250200	2228900	1877100	1594700	1889600	1743200	2107900	1593400	3345800	2.22423e+06	1.78713e+06	1.81483e+06	0.000138488	0.000613973	1.87216	1	-0.589043	-11.7381	0.00342604	-0.904704	-18.8635	4.37897e-05	-0.882514	-18.299	2.60564e-05	-0.315661	-7.41098	0.0513298	-0.293471	-6.59127	0.025	0.0221898	-0.381241	0.842066	131.958
sp	Homo sapiens	O75521	ECI2_HUMAN	ECI2	Enoyl-CoA delta isomerase 2 mitochondrial	cytosol [GO:0005829]; intracellular membrane-bounded organelle [GO:0043231]; membrane [GO:0016020]; mitochondrion [GO:0005739]; peroxisomal matrix [GO:0005782]; peroxisome [GO:0005777]	FALSE	4	118.74	28600000	3053400	3022300	2713000	2237400	2682800	3097000	2527000	2376200	2511400	3547600	3427300	3329100	2.92957e+06	2672400	2.47153e+06	3.43467e+06					-0.132551	-1.54359	0.503855	-0.245281	-3.60093	0.150987	0.229483	-4.73406	0.0654537	-0.11273	-1.38356	0.578479	0.362034	-7.39522	0.0159505	0.474764	-9.80722	0.00683567	106.13
sp	Homo sapiens	O75528	TADA3_HUMAN	TADA3	Transcriptional adapter 3	Ada2/Gcn5/Ada3 transcription activator complex [GO:0005671]; mitotic spindle [GO:0072686]; nucleoplasm [GO:0005654]; nucleus [GO:0005634]; SAGA complex [GO:0000124]; STAGA complex [GO:0030914]; transcription factor TFTC complex [GO:0033276]	FALSE	1	28.81	352000	75722	75677	75667	64663	54605	74577	73157	62163	63142	53202	56572	39332	75688.7	64615	66154	49702					-0.228208	-2.88361	0.263365	-0.194249	-2.3609	0.298832	-0.606773	-9.44286	0.00390721	0.0339593	-0.277308	0.88726	-0.378565	-5.14337	0.0564826	-0.412524	-5.75002	0.053864	118.242
sp	Homo sapiens	O75529	TAF5L_HUMAN	TAF5L	TAF5-like RNA polymerase II p300/CBP-associated factor-associated factor 65 kDa subunit 5L	cytoplasmic ribonucleoprotein granule [GO:0036464]; nuclear chromatin [GO:0000790]; nuclear speck [GO:0016607]; nucleus [GO:0005634]; STAGA complex [GO:0030914]; transcription factor TFTC complex [GO:0033276]	FALSE	1	53.97	1710000	249540	209790	227630	213710	218490	242400	179610	154950	211610	121350	172520	150940	228987	224867	182057	148270					-0.0261938	-0.220591	0.91474	-0.330876	-4.58343	0.0882965	-0.627037	-10.1759	0.0025497	-0.304682	-4.10802	0.181574	-0.600843	-9.70159	0.00442554	-0.296161	-4.10802	0.127406	127.287
sp	Homo sapiens	O75530	EED_HUMAN	EED	Polycomb protein EED	cytosol [GO:0005829]; ESC/E(Z) complex [GO:0035098]; nucleoplasm [GO:0005654]; nucleus [GO:0005634]; pronucleus [GO:0045120]; sex chromatin [GO:0001739]	FALSE	2	62.92	7720000	500530	506960	481090	401120	408910	467610	486530	415060	481810	394410	509630	414300	496193	425880	461133	439447					-0.220455	-4.662	0.111232	-0.105718	-1.13402	0.570786	-0.175214	-2.38666	0.262162	0.114737	-2.72832	0.326149	0.0452411	-1.41184	0.472701	-0.0694959	-0.859003	0.676578	109.846
sp	Homo sapiens	O75533	SF3B1_HUMAN	SF3B1	Splicing factor 3B subunit 1	catalytic step 2 spliceosome [GO:0071013]; nuclear speck [GO:0016607]; nucleoplasm [GO:0005654]; nucleus [GO:0005634]; spliceosomal complex [GO:0005681]; U11/U12 snRNP [GO:0034693]; U12-type spliceosomal complex [GO:0005689]; U2 snRNP [GO:0005686]; U2-type precatalytic spliceosome [GO:0071005]; U2-type prespliceosome [GO:0071004]	FALSE	43	344.46	1090000000	27081000	25645000	26984000	28219000	30889000	33024000	32378000	29843000	35128000	23318000	30010000	27058000	26570000	3.07107e+07	3.24497e+07	2.67953e+07					0.208942	-4.4682	0.122335	0.288405	-5.32773	0.0587404	0.0121835	-0.0451649	0.976489	0.0794638	-0.412239	0.854315	-0.196758	-4.57166	0.0783906	-0.276222	-5.43361	0.0637006	92.9615
sp	Homo sapiens	O75534	CSDE1_HUMAN	CSDE1	Cold shock domain-containing protein E1	CRD-mediated mRNA stability complex [GO:0070937]; cytoplasmic stress granule [GO:0010494]; cytosol [GO:0005829]; Golgi apparatus [GO:0005794]; P-body [GO:0000932]; plasma membrane [GO:0005886]	TRUE	22	240.18	450000000	13487000	14273000	12641000	8567800	10212000	10877000	12375000	10941000	11735000	12678000	12239000	11368000	13467000	9885600	1.16837e+07	12095000	0.0092044	0.0157166	1.36228		-0.446028	-9.74586	0.00880969	-0.204935	-3.2281	0.185394	-0.155018	-3.2281	0.159694	0.241093	-5.0709	0.125752	0.29101	-5.0709	0.0589328	0.0499177	0	1	114.463
sp	Homo sapiens	O75578	ITA10_HUMAN	ITGA10	Integrin alpha-10	integrin alpha10-beta1 complex [GO:0034680]; integrin complex [GO:0008305]; plasma membrane [GO:0005886]	TRUE	2	55.83	5320000	221250	245450	249930	313470	248310	293600	243840	242760	266920	193360	247640	194520	238877	285127	251173	211840	0.0409728	0.0558493	1.34595		0.255337	-4.75754	0.106585	0.0724174	-0.793891	0.678818	-0.173291	-2.6212	0.227845	-0.18292	-3.2886	0.256323	-0.428628	-8.76265	0.00750653	-0.245708	-4.0289	0.132883	89.6641
sp	Homo sapiens	O75581	LRP6_HUMAN	LRP6	Low-density lipoprotein receptor-related protein 6	cell surface [GO:0009986]; cytoplasmic vesicle [GO:0031410]; early endosome membrane [GO:0031901]; endoplasmic reticulum [GO:0005783]; extracellular region [GO:0005576]; integral component of membrane [GO:0016021]; membrane raft [GO:0045121]; neuronal cell body [GO:0043025]; plasma membrane [GO:0005886]; synapse [GO:0045202]; Wnt-Frizzled-LRP5/6 complex [GO:1990851]; Wnt signalosome [GO:1990909]	TRUE	39	298.37	2110000000	28858000	28906000	29008000	29860000	30685000	28607000	22703000	19712000	22106000	17545000	22677000	17866000	28924000	2.97173e+07	21507000	1.93627e+07	0.000407626	0.00133677	1.53477	2	0.0390376	-0.521544	0.807587	-0.427461	-11.2957	0.00229084	-0.578989	-14.5776	0.000206161	-0.466498	-12.2798	0.00948095	-0.618027	-15.4509	0.00024308	-0.151529	-2.39547	0.310552	115.999
sp	Homo sapiens	O75592	MYCB2_HUMAN	MYCBP2	E3 ubiquitin-protein ligase MYCBP2	axon [GO:0030424]; cytoplasm [GO:0005737]; intracellular membrane-bounded organelle [GO:0043231]; membrane [GO:0016020]; microtubule cytoskeleton [GO:0015630]; nucleoplasm [GO:0005654]; nucleus [GO:0005634]	FALSE	11	149.35	30900000	2488700	3201900	2095000	1714600	1684200	1982000	1986300	1880800	1863700	1740700	1595800	1813600	2595200	1793600	1.91027e+06	1716700					-0.532988	-8.71184	0.0147608	-0.442072	-7.35555	0.0193689	-0.596208	-10.0378	0.00276054	0.0909159	-0.681825	0.76646	-0.0632202	-0.681825	0.7057	-0.154136	-1.58591	0.468611	124.19
sp	Homo sapiens	O75607	NPM3_HUMAN	NPM3	Nucleoplasmin-3	actin cytoskeleton [GO:0015629]; cytoplasm [GO:0005737]; cytosol [GO:0005829]; nucleolus [GO:0005730]; nucleoplasm [GO:0005654]	FALSE	1	30.91	733000	65185	108250	41870	29025	38521	31764	38475	45531	46834	40614	52599	59673	71768.3	33103.3	43613.3	50962					-1.11637	-9.12529	0.0119352	-0.718578	-5.02534	0.0693616	-0.493926	-2.77552	0.208493	0.397793	-2.70415	0.329183	0.622445	-4.94435	0.0633767	0.224653	-1.35133	0.530717	130.731
sp	Homo sapiens	O75608	LYPA1_HUMAN	LYPLA1	Acyl-protein thioesterase 1	cytoplasm [GO:0005737]; cytosol [GO:0005829]; endoplasmic reticulum [GO:0005783]; extracellular exosome [GO:0070062]; nuclear membrane [GO:0031965]; plasma membrane [GO:0005886]	TRUE	5	109.62	239000000	2963800	3266200	3110000	2344400	2514600	3024700	2680200	2374600	2470100	3918500	3790600	3453800	3.11333e+06	2627900	2508300	3.72097e+06	0.00148897	0.00369344	1.48346		-0.24455	-5.04376	0.0927423	-0.31175	-6.83127	0.0256932	0.257217	-5.23501	0.0484587	-0.0672005	-0.942439	0.687513	0.501767	-11.6981	0.00152676	0.568968	-13.291	0.00143116	99.0368
sp	Homo sapiens	O75616	ERAL1_HUMAN	ERAL1	GTPase Era mitochondrial	cytosol [GO:0005829]; mitochondrial inner membrane [GO:0005743]; mitochondrial matrix [GO:0005759]; mitochondrion [GO:0005739]	FALSE	9	184.52	112000000	5218500	5754700	4865000	4837900	4954300	5102100	4803500	5004100	5068200	4139600	4021000	4198100	5279400	4.96477e+06	4958600	4.11957e+06					-0.0886481	-1.60135	0.491096	-0.0904411	-0.869943	0.652855	-0.357881	-9.71394	0.0033355	-0.00179306	-0.516927	0.830481	-0.269233	-6.99708	0.0198898	-0.26744	-8.06913	0.0162526	108.03
sp	Homo sapiens	O75643	U520_HUMAN	SNRNP200	U5 small nuclear ribonucleoprotein 200 kDa helicase	catalytic step 2 spliceosome [GO:0071013]; membrane [GO:0016020]; nucleoplasm [GO:0005654]; nucleus [GO:0005634]; spliceosomal complex [GO:0005681]; U2-type catalytic step 1 spliceosome [GO:0071006]; U2-type precatalytic spliceosome [GO:0071005]; U4/U6 x U5 tri-snRNP complex [GO:0046540]; U5 snRNP [GO:0005682]	FALSE	62	400.06	1170000000	51740000	50986000	51771000	49069000	49751000	55045000	54451000	49872000	53838000	35123000	40446000	38960000	51499000	5.12883e+07	5.27203e+07	3.81763e+07					-0.00591373	-0.0165922	0.994254	0.0338151	-1.1853	0.556239	-0.431866	-11.5251	0.00116884	0.0397288	-1.2122	0.61857	-0.425952	-11.4887	0.00169158	-0.465681	-13.4474	0.00135062	106.854
sp	Homo sapiens	O75648	MTU1_HUMAN	TRMU	Mitochondrial tRNA-specific 2-thiouridylase 1	mitochondrion [GO:0005739]; nucleoplasm [GO:0005654]	FALSE	1	50.12	2150000	106020	98528	111660	101140	127400	111380	121870	110290	103020	115180	119260	105200	105403	113307	111727	113213					0.104321	-1.47899	0.520063	0.0840622	-1.47899	0.478519	0.103133	-1.47899	0.44389	-0.0202592	0	1	-0.00118887	-3.74801e-14	1	0.0190703	-3.74801e-14	1	95.589
sp	Homo sapiens	O75663	TIPRL_HUMAN	TIPRL	TIP41-like protein	cytosol [GO:0005829]	FALSE	3	72.73	22600000	414860	469550	439120	301050	420830	347090	470770	448190	425810	600060	625830	670560	441177	356323	448257	632150					-0.30817	-5.81252	0.0625843	0.0229685	-0.206562	0.907286	0.51891	-11.335	0.00130569	0.331138	-6.27717	0.0766254	0.82708	-17.4306	0.000100269	0.495942	-10.9031	0.00402666	88.3665
sp	Homo sapiens	O75665	OFD1_HUMAN	OFD1	Oral-facial-digital syndrome 1 protein	centriolar satellite [GO:0034451]; centriole [GO:0005814]; centrosome [GO:0005813]; ciliary basal body [GO:0036064]; cilium [GO:0005929]; cytosol [GO:0005829]; extracellular region [GO:0005576]; membrane [GO:0016020]; motile cilium [GO:0031514]; nucleus [GO:0005634]	TRUE	21	202.8	107000000	11608000	19059000	4931700	2884400	3187400	3950900	4025500	3602300	3392600	3070600	2759900	2878600	1.18662e+07	3340900	3.67347e+06	2.90303e+06	0.0085385	0.0147147	4.08753	1	-1.82855	-11.0179	0.00483165	-1.69165	-10.0344	0.00453926	-2.03123	-12.2084	0.000786322	0.136905	-0.499371	0.835657	-0.202676	-0.644974	0.722493	-0.339581	-1.30795	0.542259	213.151
sp	Homo sapiens	O75674	TM1L1_HUMAN	TOM1L1	TOM1-like protein 1	cytoplasm [GO:0005737]; cytosol [GO:0005829]; endosome [GO:0005768]; endosome membrane [GO:0010008]; extracellular exosome [GO:0070062]; Golgi stack [GO:0005795]; lysosome [GO:0005764]; membrane [GO:0016020]	TRUE	1	52.18	648000	16726	26295	16538	15490	10014	18680	19870	18770	29726	41377	30900	30754	19853	14728	22788.7	34343.7					-0.430795	-3.08244	0.240924	0.198959	-1.45273	0.484787	0.790687	-6.99291	0.0167946	0.629755	-5.51076	0.10457	1.22148	-11.41	0.00176378	0.591728	-4.46567	0.105424	72.949
sp	Homo sapiens	O75676	KS6A4_HUMAN	RPS6KA4	Ribosomal protein S6 kinase alpha-4	cytosol [GO:0005829]; nucleoplasm [GO:0005654]; nucleus [GO:0005634]	FALSE	7	132.27	11300000	1103700	1399300	1193800	804260	1007200	878100	892340	1039100	1088800	1148100	930200	1131800	1.23227e+06	896520	1.00675e+06	1.07003e+06					-0.458907	-9.46436	0.0101531	-0.291614	-4.39752	0.0978557	-0.203659	-3.7042	0.12102	0.167293	-3.59372	0.225868	0.255248	-4.28318	0.093004	0.087955	-0.336567	0.853271	104.975
sp	Homo sapiens	O75683	SURF6_HUMAN	SURF6	Surfeit locus protein 6	granular component [GO:0001652]; nucleolus [GO:0005730]; nucleoplasm [GO:0005654]	FALSE	11	174.38	160000000	5045200	4276900	4939800	4715600	5321900	5878800	6081400	4827500	7254900	3202200	4561900	3918700	4.75397e+06	5.30543e+06	6054600	3.89427e+06					0.158339	-1.54982	0.502297	0.3489	-3.97468	0.123179	-0.28778	-3.74109	0.118373	0.190561	-1.66824	0.511915	-0.446119	-6.36345	0.0283668	-0.63668	-9.18784	0.00936503	100.862
sp	Homo sapiens	O75688	PPM1B_HUMAN	PPM1B	Protein phosphatase 1B	cytosol [GO:0005829]; membrane [GO:0016020]; nucleolus [GO:0005730]; nucleus [GO:0005634]	FALSE	2	83.97	7800000	248010	233730	260360	168190	210600	209550	176210	200620	159230	249370	282630	221680	247367	196113	178687	251227					-0.334963	-5.75221	0.0643113	-0.469219	-9.65043	0.00549614	0.0223385	-0.230325	0.887968	-0.134256	-2.53894	0.355219	0.357302	-6.26661	0.0299255	0.491558	-10.1448	0.00582706	113.585
sp	Homo sapiens	O75691	UTP20_HUMAN	UTP20	Small subunit processome component 20 homolog	90S preribosome [GO:0030686]; cytoplasm [GO:0005737]; nucleolus [GO:0005730]; nucleoplasm [GO:0005654]; plasma membrane [GO:0005886]; preribosome, small subunit precursor [GO:0030688]; small-subunit processome [GO:0032040]	TRUE	35	264.54	308000000	12584000	10862000	11654000	11091000	10613000	11569000	11189000	9609500	10966000	7204900	8723100	8203400	11700000	11091000	1.05882e+07	8043800	0.00141406	0.00355108	1.45454		-0.0771191	-1.34092	0.554925	-0.144056	-2.72117	0.24549	-0.540559	-11.9965	0.000890085	-0.0669366	-0.916415	0.694924	-0.46344	-9.76309	0.0042803	-0.396504	-8.04587	0.0164273	121.517
sp	Homo sapiens	O75694	NU155_HUMAN	NUP155	Nuclear pore complex protein Nup155	host cell [GO:0043657]; membrane [GO:0016020]; nuclear envelope [GO:0005635]; nuclear membrane [GO:0031965]; nuclear pore inner ring [GO:0044611]	FALSE	18	271.07	217000000	6552700	6930500	6448400	6658800	6949000	6818700	7943600	7274700	7685400	5714900	6121700	5733600	6.64387e+06	6.80883e+06	7.63457e+06	5.85673e+06					0.0353845	-1.16958	0.600982	0.200523	-6.6498	0.0283376	-0.181927	-4.81909	0.0621973	0.165139	-4.5279	0.153986	-0.217311	-6.94976	0.0204048	-0.38245	-12.7642	0.00176905	97.2788
sp	Homo sapiens	O75695	XRP2_HUMAN	RP2	Protein XRP2	centriole [GO:0005814]; ciliary basal body [GO:0036064]; cilium [GO:0005929]; cytoplasm [GO:0005737]; cytoplasmic vesicle [GO:0031410]; extracellular exosome [GO:0070062]; Golgi apparatus [GO:0005794]; nuclear body [GO:0016604]; nucleoplasm [GO:0005654]; periciliary membrane compartment [GO:1990075]; plasma membrane [GO:0005886]	TRUE	3	106.91	27600000	499440	409820	469920	509300	440510	447420	538700	503590	622940	569780	747170	574640	459727	465743	555077	630530	0.0291572	0.0415082	1.37153		0.0187588	-0.522752	0.807349	0.271911	-3.73783	0.139957	0.455789	-7.86615	0.00997166	0.253152	-2.75938	0.321637	0.43703	-6.78193	0.0223677	0.183878	-2.75938	0.257189	94.6323
sp	Homo sapiens	O75716	STK16_HUMAN	STK16	Serine/threonine-protein kinase 16	cytoplasm [GO:0005737]; cytosol [GO:0005829]; Golgi-associated vesicle [GO:0005798]; membrane [GO:0016020]; perinuclear region of cytoplasm [GO:0048471]	FALSE	2	50.95	3780000	345700	316020	409020	350300	339030	359800	369320	319310	342150	390580	402880	426710	356913	349710	343593	406723					-0.0294147	-0.125392	0.953175	-0.0548718	-0.303013	0.865495	0.188474	-4.43811	0.0781283	-0.025457	-0.451902	0.845222	0.217889	-4.16056	0.0995121	0.243346	-5.08566	0.0772474	94.9113
sp	Homo sapiens	O75717	WDHD1_HUMAN	WDHD1	WD repeat and HMG-box DNA-binding protein 1	cytoplasm [GO:0005737]; nuclear replication fork [GO:0043596]; nucleoplasm [GO:0005654]; replication fork protection complex [GO:0031298]	FALSE	8	148.41	18300000	1976100	1902900	1949200	1569900	1602800	1608300	1563000	1474500	1704100	1597400	1754400	1680200	1.94273e+06	1.59367e+06	1.58053e+06	1.67733e+06					-0.285738	-8.68723	0.0149426	-0.297676	-8.68723	0.009257	-0.211918	-6.30111	0.0255872	-0.0119384	0	1	0.0738195	-1.3428	0.492012	0.085758	-1.3428	0.532202	116.339
sp	Homo sapiens	O75718	CRTAP_HUMAN	CRTAP	Cartilage-associated protein	endoplasmic reticulum [GO:0005783]; endoplasmic reticulum lumen [GO:0005788]; extracellular space [GO:0005615]; protein-containing complex [GO:0032991]	TRUE	4	108.37	118000000	1966300	1708400	1911700	1930800	1968200	1767100	1970100	1925800	1984800	1605200	1765800	1673700	1.86213e+06	1888700	1.96023e+06	1.68157e+06	0.0383196	0.0528138	1.16572		0.0204372	-0.494752	0.815356	0.074069	-1.14948	0.566533	-0.14715	-2.90935	0.192789	0.0536318	-0.519524	0.829932	-0.167588	-3.85063	0.118936	-0.221219	-4.88722	0.0852349	106.392
sp	Homo sapiens	O75746	CMC1_HUMAN	SLC25A12	Calcium-binding mitochondrial carrier protein Aralar1	integral component of membrane [GO:0016021]; mitochondrial inner membrane [GO:0005743]; mitochondrion [GO:0005739]	FALSE	18	272.06	465000000	16611000	16551000	18451000	22952000	20618000	20063000	21988000	28478000	26269000	22015000	19296000	27135000	1.72043e+07	21211000	2.55783e+07	2.28153e+07					0.302041	-5.42983	0.0761138	0.57215	-10.1932	0.0041742	0.407232	-6.80551	0.0188131	0.27011	-3.32183	0.252557	0.105191	-0.688662	0.702488	-0.164919	-2.13605	0.355202	76.5405
sp	Homo sapiens	O75751	S22A3_HUMAN	SLC22A3	Solute carrier family 22 member 3	integral component of plasma membrane [GO:0005887]; membrane [GO:0016020]; neuronal cell body [GO:0043025]; plasma membrane [GO:0005886]; presynapse [GO:0098793]	TRUE	6	157.76	4190000000	15772000	14609000	14876000	19359000	18885000	21324000	19716000	15083000	17386000	13444000	15041000	12181000	1.50857e+07	19856000	17395000	1.35553e+07	0.00503941	0.00948344	1.46481		0.396397	-8.25655	0.0182794	0.205494	-3.41689	0.166996	-0.154318	-2.69179	0.218686	-0.190902	-3.41956	0.242511	-0.550714	-12.1571	0.00121025	-0.359812	-7.44171	0.0220192	95.7446
sp	Homo sapiens	O75771	RA51D_HUMAN	RAD51D	DNA repair protein RAD51 homolog 4	centrosome [GO:0005813]; chromosome, telomeric region [GO:0000781]; cytoplasm [GO:0005737]; nuclear chromosome, telomeric region [GO:0000784]; nucleoplasm [GO:0005654]; nucleus [GO:0005634]; Rad51B-Rad51C-Rad51D-XRCC2 complex [GO:0033063]; replication fork [GO:0005657]	FALSE	1	60.41	0	117030	127860	99144	93127	82378	94705	118080	100080	139280	64105	82634	92557	114678	90070	119147	79765.3					-0.34847	-4.77752	0.105356	0.0551499	-0.377573	0.836245	-0.523755	-7.75321	0.0106675	0.40362	-5.57737	0.101965	-0.175285	-1.77828	0.383918	-0.578905	-8.55815	0.0127367	115.969
[truncated: 5,743 more rows]
[truncated: 23 more columns]

## Sheet: Populate Charts
Gene 1	N
Gene 2	ERVH48-1
Gene 3	ACE2
Gene 4	TRIM33

## Sheet: Lookup
	12h/Mock	log p	q	24h/mock	log p	q	48h/mock	log p	q	12h/2h	log p	q	24h/2h	log p	q	48h/2h	log p	q	24h/12h	log p	q	48h/12h	log p	q	48h/24h	log p	q
[truncated: 20 more rows]

[truncated: 2 more sheets: Scaled Abundance, RPQ]
